# Supplementary material for: Preclinical activity of brincidofovir in Peripheral T-cell and NK/T-cell Lymphoma
Source: Research Square preprint supplement (doi:10.21203/rs.3.rs-6768176/v1), 2025-06-03
Supplement: Supplementary file 2 [file e8de9bf82c4f78f25cf63624.xlsx]

## Sheet: Table S1
Supplementary Table 1. Differentially regulated genes in sensitive versus resistant NKTCL cell lines
Gene	baseMean	log2FoldChange	lfcSE	pvalue	padj
TLE1	207.204	-7.39008	0.597593	2.14e-35	3.51e-31
ZNF441	129.566	10.8716	1.37664	1.59e-31	1.31e-27
FGF13	204.402	-4.07e-07	0.00144269	5.37e-22	2.94e-18
AFP	146.574	-3.42e-07	0.00144269	1.57e-18	6.45e-15
FUT4	64.1491	9.73355	1.51616	7.18e-18	2.36e-14
KIR3DL2	488.35	-6.67e-10	0.00144269	9.59e-17	2.63e-13
P2RX7	137.3	6.85037	0.851561	1.25e-16	2.92e-13
POF1B	1783.73	-3.03e-06	0.0014427	2.66e-16	5.46e-13
HMGB1P17	41.6675	-3.33e-07	0.00144269	5.97e-16	1.04e-12
FMO3	115.897	-8.94e-09	0.00144269	6.3e-16	1.04e-12
LAYN	58.4316	-2.73e-07	0.00144269	1.3e-15	1.91e-12
SSX8	70.2666	-8.92e-08	0.00144269	1.39e-15	1.91e-12
ONECUT2	211.412	-2.62e-07	0.00144269	1.52e-15	1.92e-12
TMEM176B	112.574	-1.98e-07	0.00144269	4.58e-15	5.37e-12
OCRL	89.3592	-1.73e-07	0.00144269	2.86e-14	3.13e-11
NAALADL2-AS2	46.3204	-2.71e-07	0.00144269	2.06e-13	2.11e-10
GSTM1	45.5463	-2.97e-07	0.00144269	2.61e-13	2.52e-10
VN1R53P	35.9119	-1.32e-07	0.00144269	2.96e-13	2.7e-10
RYR1	85.726	3.96025	0.575466	4.94e-13	4.27e-10
LINC00284	32.2327	-2.56e-07	0.00144269	3.59e-12	2.95e-09
SULF1	2562.19	-9.24e-07	0.00144269	7.91e-12	6.19e-09
C10orf54	199.594	6.9004	1.06003	1.08e-11	8.04e-09
ITGB2-AS1	171.241	6.01319	0.934609	1.39e-11	9.91e-09
GATA4	9.82839	1.34e-07	0.00144269	2.84e-11	1.91e-08
CLIC2	359.711	-2.56e-06	0.0014427	2.91e-11	1.91e-08
NRIP1	801.678	-1.19e-06	0.00144269	3.03e-11	1.92e-08
IFI27	1466.73	8.12374	1.29371	5.46e-11	3.32e-08
BAHCC1	413.328	8.16149	1.32216	9.46e-11	5.55e-08
NEXN	368.878	4.03643	0.668046	1.38e-10	7.84e-08
KIAA1456	24.4685	-2.66e-07	0.00144269	1.74e-10	9.54e-08
HMOX1	48.4017	7.33743	1.25979	5.22e-10	2.77e-07
FAM89A	192.737	-8.79171	1.55833	5.63e-10	2.89e-07
ZNF711	57.939	-3.64e-06	0.0014427	5.94e-10	2.96e-07
MXRA7	350.715	4.97793	0.857448	6.63e-10	3.2e-07
MLC1	283.991	8.99586	1.52996	6.91e-10	3.25e-07
AK4	329.016	-6.88203	1.28372	8.86e-10	4.04e-07
ZNF141	175.849	10.1511	1.88476	3.55e-09	1.57e-06
SOX5	889.594	-1.93e-06	0.0014427	3.63e-09	1.57e-06
KLF7	246.612	-8.42e-07	0.00144269	6.06e-09	2.55e-06
LRRTM4	103.255	-1.57e-06	0.00144269	8.02e-09	3.29e-06
ZNF829	142.701	7.95642	1.52293	1.81e-08	7.26e-06
PARD3B	100.581	-1.62e-06	0.00144269	1.95e-08	7.49e-06
LAIR2	338.789	4.59856	0.885648	1.96e-08	7.49e-06
DLC1	474.689	-9.04e-07	0.00144269	7.7e-08	2.88e-05
CABLES1	67.8035	5.56399	1.12883	8.26e-08	3.02e-05
MUC19	77.4029	-1.92e-06	0.0014427	1.2e-07	4.29e-05
IL23R	766.624	-1.17e-06	0.00144269	1.32e-07	4.58e-05
B4GALNT3	90.2602	5.91076	1.2208	1.34e-07	4.58e-05
PLEKHA5	574.112	-8.65e-07	0.00144269	1.41e-07	4.74e-05
CACNA2D3	290.236	-1.07e-06	0.00144269	1.51e-07	4.95e-05
ARSD	37.8343	8.51549	1.99053	1.61e-07	5.2e-05
ANO2	317.673	-1.05e-06	0.00144269	1.86e-07	5.88e-05
ZNF551	165.12	13.0845	3.81893	1.97e-07	6.06e-05
TENM2	197.289	-1.31e-06	0.00144269	1.99e-07	6.06e-05
WHAMMP2	18.7115	9.80213	3.19207	2.07e-07	6.12e-05
LAMB3	1694.95	-1.9e-06	0.0014427	2.09e-07	6.12e-05
PLAC8	127.501	5.99198	1.26334	2.18e-07	6.23e-05
PCBP3	84.615	-1.65e-06	0.00144269	2.2e-07	6.23e-05
TRIM43	197.545	-8.29e-07	0.00144269	2.68e-07	7.37e-05
TDO2	538.753	-1.09e-06	0.00144269	2.69e-07	7.37e-05
GRM7	205.883	-7.83e-07	0.00144269	3.88e-07	0.000104413
GOLGA8M	35.0504	8.31093	2.02603	4.04e-07	0.000106996
USH2A	632.538	-1.15e-06	0.00144269	4.4e-07	0.000114791
TRIM53AP	312.432	-6.38e-07	0.00144269	4.78e-07	0.000122759
CSMD3	229.956	-6.31e-07	0.00144269	5.1e-07	0.000127673
GLDN	79.8104	8.03876	1.82404	5.17e-07	0.000127673
CNTNAP4	275.342	-1.21e-06	0.00144269	5.21e-07	0.000127673
OAS3	737.325	5.75477	1.26746	5.54e-07	0.000133941
KLHL14	68.2104	-9.64e-07	0.00144269	5.73e-07	0.000136417
CCL17	2250.1	-5.91e-07	0.00144269	5.84e-07	0.000137103
ACCS	19.3552	9.80352	3.24386	6.41e-07	0.000148356
MMP25	653.106	3.81131	0.860984	7.48e-07	0.000170696
MGST3	1903.49	3.25e-06	0.0014427	9.79e-07	0.000220229
UNC5D	49.7169	-1.88e-06	0.0014427	9.97e-07	0.000221277
CCL22	346.11	-5.82e-07	0.00144269	1.48e-06	0.000323767
PRDM16	144.715	5.19494	1.21317	1.51e-06	0.000327043
FRG2C	156.03	-9.07e-07	0.00144269	1.72e-06	0.000363847
C1orf61	135.832	-5.314	1.40213	1.73e-06	0.000363847
TPM1	83.6802	4.38632	1.0369	1.9e-06	0.000395044
ABCA8	122.371	-1.01e-06	0.00144269	2.49e-06	0.000512021
STRIP2	2277.61	-2.22405	0.586125	3.1e-06	0.000626212
NAV3	137.622	-1.59e-06	0.00144269	3.15e-06	0.000626212
SSX1	611.096	-4.16e-07	0.00144269	3.16e-06	0.000626212
SCN2A	186.867	-3.52471	0.951633	3.21e-06	0.000628536
NOS3	147.552	-5.1699	1.44747	3.49e-06	0.00067445
ZNF568	68.3783	11.5824	3.73306	3.75e-06	0.000715976
RXFP1	479.635	-6e-07	0.00144269	4.06e-06	0.000767511
KIF16B	463.045	-9.84e-07	0.00144269	4.26e-06	0.00079547
KIAA1244	64.9884	7.23684	1.77646	4.49e-06	0.000828517
RPS3AP6	136.308	-0.867586	0.228429	4.69e-06	0.000855787
LINC00423	51.6208	-8.5e-07	0.00144269	4.84e-06	0.000873413
LGALS9B	90.2833	5.75499	1.43912	4.89e-06	0.000873839
PRDM9	117.579	-8.38e-07	0.00144269	5.03e-06	0.000888611
GMPR	10.5932	5.40967	1.38067	5.15e-06	0.000900632
SSX6	92.829	-8.01e-07	0.00144269	5.31e-06	0.000909748
HGF	2959.73	2.94e-06	0.0014427	5.32e-06	0.000909748
MACROD2	265.353	-7.23e-07	0.00144269	5.51e-06	0.000933875
C19orf77	22.3591	6.29013	1.62887	5.96e-06	0.000999014
ADRB1	89.5022	6.07132	1.53198	6.02e-06	0.000999014
ADAMDEC1	36.2687	-9.18e-07	0.00144269	7.27e-06	0.00119402
ALB	245.262	-6.31e-07	0.00144269	7.39e-06	0.00120205
AMOTL1	112.117	-1.85e-06	0.0014427	7.58e-06	0.00122037
CCR3	85.3908	5.05274	1.30592	8.25e-06	0.0013157
ZG16B	14.6841	5.0227	1.31509	8.46e-06	0.00133674
ZHX1-C8ORF76	53.8991	1.51891	0.407256	9.03e-06	0.00141357
GPR97	68.8182	6.15375	1.59822	9.4e-06	0.00145041
FRMPD4	175.401	-5.86e-07	0.00144269	9.45e-06	0.00145041
LINGO3	13.5479	3.97162	1.06249	1.06e-05	0.00160694
AGMO	159.171	-5.37e-07	0.00144269	1.07e-05	0.00161404
CALHM1	48.4985	4.31528	1.14372	1.1e-05	0.00164625
PSD3	442.732	-1.68e-06	0.00144269	1.11e-05	0.00164916
GRID1	33.4355	-1.67e-06	0.00144269	1.21e-05	0.00176812
AQP3	72.8217	6.49711	1.71837	1.27e-05	0.00183713
RPS3A	24416.7	-0.665907	0.188684	1.27e-05	0.00183713
ZNF154	27.3004	5.31497	1.40255	1.31e-05	0.00187024
NBEAP1	79.8503	-1.34e-06	0.00144269	1.37e-05	0.00192049
PLXNB1	31.7015	5.40656	1.45623	1.38e-05	0.00192049
ORAI2	2750.47	3.14568	0.848371	1.38e-05	0.00192049
PRDM5	95.4312	-1.11e-06	0.00144269	1.41e-05	0.00194987
PTPRG	230.133	-2.05e-06	0.0014427	1.47e-05	0.00200003
ZFAND5	6002.09	-1.41443	0.41177	1.47e-05	0.00200003
DLL4	9.4527	4.51784	1.21602	1.54e-05	0.00207847
KCNJ3	17.5717	-1.02e-06	0.00144269	1.59e-05	0.00212628
LAMC3	52.9619	-1.65e-06	0.00144269	1.69e-05	0.00223796
ACSM2B	64.6012	-7.78e-07	0.00144269	1.8e-05	0.00236944
PLOD2	157.944	-1.18e-06	0.00144269	1.87e-05	0.00243615
HDC	1401.13	-1.17e-06	0.00144269	1.95e-05	0.00251859
LMO3	99.145	-8.41e-07	0.00144269	1.98e-05	0.00254603
KCNK2	26.332	-1.26e-06	0.00144269	2.2e-05	0.00279797
PACSIN3	77.7059	5.14217	1.4294	2.22e-05	0.00280811
AXIN2	46.2493	5.4658	1.5357	2.32e-05	0.00290445
PDE10A	119.118	-2.18e-06	0.0014427	2.34e-05	0.0029161
PPARGC1A	290.02	-6.04e-07	0.00144269	2.36e-05	0.00291837
CPXCR1	32.2603	-1.67e-06	0.00144269	2.45e-05	0.00300942
FAM115C	569.537	-2.04248	0.63407	2.5e-05	0.00304233
PARK2	49.0259	-1.23e-06	0.00144269	2.63e-05	0.0031715
HBE1	50.1067	-8.65e-07	0.00144269	2.69e-05	0.00322513
SV2B	15.7213	5.77147	1.65178	2.74e-05	0.00325948
LDB2	67.1409	5.75954	1.62463	2.76e-05	0.00325948
LRRTM3	240.847	-9.07e-07	0.00144269	2.78e-05	0.00326744
GPR35	118.307	4.32697	1.22509	2.85e-05	0.0033085
TMEM241	331.7	1.33055	0.389145	2.86e-05	0.0033085
CD226	1306.86	-2.49e-06	0.0014427	3.27e-05	0.00375217
PTN	159.774	-8.95e-07	0.00144269	3.63e-05	0.00414601
KCNK5	43.4869	-8.74e-07	0.00144269	3.73e-05	0.00422689
ACSM2A	50.7955	-6.48e-07	0.00144269	4.02e-05	0.00452333
PNKD	309.889	0.66657	0.203822	4.26e-05	0.00475722
PLD5	196.878	-6.11e-07	0.00144269	4.6e-05	0.00507306
DOK6	73.8201	-5.12e-06	0.0014427	4.6e-05	0.00507306
BCORP1	36.396	7.88671	2.48721	4.83e-05	0.00529218
PKHD1	46.1367	-1.02e-06	0.00144269	5e-05	0.00540418
EIF3IP1	4.84376	-2.57e-06	0.0014427	5e-05	0.00540418
ACOT12	308.376	-6.37e-07	0.00144269	5.22e-05	0.00560045
NMUR1	120.66	5.96201	1.7699	5.41e-05	0.00576741
CNTN5	19.544	-9.65e-07	0.00144269	5.5e-05	0.0058244
DGKB	259.586	-6.58e-07	0.00144269	5.53e-05	0.0058244
GNAL	1011.12	-1.52e-06	0.00144269	5.79e-05	0.00605837
FGF9	85.1519	-1.68e-06	0.00144269	5.87e-05	0.00610011
TSHZ2	533.08	-2.52e-07	0.00144269	6.52e-05	0.00672756
RYBP	3068.45	-1.05e-05	0.00144271	6.59e-05	0.00672756
HYAL4	199.198	-5.74e-07	0.00144269	6.63e-05	0.00672756
ARHGAP32	62.7379	-1.89e-06	0.0014427	6.63e-05	0.00672756
RASAL2	320.582	-5.95e-07	0.00144269	7.22e-05	0.00726224
ZNF649	69.7289	7.32e-07	0.00144269	7.25e-05	0.00726224
COL4A5	106.311	-5.56e-07	0.00144269	7.8e-05	0.00772458
RELN	22.6525	-1.92e-06	0.0014427	7.8e-05	0.00772458
ABCA4	53.5019	-1.34e-06	0.00144269	8.01e-05	0.00787924
FCER1G	74.2669	2.93918	0.925072	8.29e-05	0.00810624
SPINT2	18.5873	-2.04e-06	0.0014427	8.47e-05	0.00823022
WDFY3	109.946	-1.3e-06	0.00144269	8.61e-05	0.00832542
CTNND2	42.8813	-5.69e-07	0.00144269	9.05e-05	0.00868974
MYBPC2	25.8032	-1.27e-06	0.00144269	9.1e-05	0.00868974
AKR1C2	34.2183	-9.53e-07	0.00144269	9.19e-05	0.00872799
MAGI2	36.5268	-8.37e-07	0.00144269	9.37e-05	0.00884762
TBX18	40.9929	-6.62e-07	0.00144269	0.000101225	0.00950302
AKR1C1	72.8386	-1.24e-06	0.00144269	0.000102172	0.00953745
NAALADL2	95.6632	-1.21e-06	0.00144269	0.000103022	0.00956238
KIF7	54.6451	3.42294	1.09722	0.000103638	0.00956551
TANC2	1007.86	-1.6e-06	0.00144269	0.000104838	0.00962224
SLC43A2	49.7482	4.63e-06	0.00144269	0.000107241	0.00978811
OAZ3	57.2703	-1.32122	0.465165	0.000109185	0.00984608
NCR2	86.5256	7.08563	2.25936	0.000109967	0.00984608
THSD7A	40.0384	-1.23e-06	0.00144269	0.000110098	0.00984608
DCT	69.8573	-2.41e-06	0.0014427	0.000110273	0.00984608
CD207	36.8888	-1.03e-06	0.00144269	0.000112022	0.00989248
RAB37	682.823	4.04759	1.2985	0.000112319	0.00989248
CD40	89.4534	-5.12e-07	0.00144269	0.000112811	0.00989248
MAT1A	14.5494	-1.95e-06	0.0014427	0.000113201	0.00989248
SERPINE2	538.109	-5.09e-07	0.00144269	0.000113965	0.00990653
OTOF	152.435	7.12667	2.33169	0.000125927	0.0108887
CYFIP1	126.058	2.23314	0.741055	0.000128574	0.0110368
SH2B2	7.21319	3.75818	1.22348	0.000128983	0.0110368
SNX19P2	43.8235	-1.33e-06	0.00144269	0.000138334	0.0117756
CCR2	54.4179	4.20597	1.38227	0.000139135	0.0117828
EDNRA	22.3529	-1.58e-06	0.00144269	0.000140139	0.0118069
ANKRD30A	1042.26	-3.42e-07	0.00144269	0.00014147	0.0118582
NTRK3	41.3127	-1.04e-06	0.00144269	0.000147558	0.0122443
SCN1A	15.9728	-2.17e-06	0.0014427	0.000147566	0.0122443
PIEZO2	373.393	-7.63e-07	0.00144269	0.000158074	0.0130502
ABP1	76.2499	-7.26e-07	0.00144269	0.000162907	0.013382
XK	181.518	6.15622	2.0771	0.000169182	0.0137779
METTL7A	295.394	4.2329	1.42197	0.000169403	0.0137779
CDH18	84.5823	-7.02e-07	0.00144269	0.000174693	0.0141381
LAMA1	15.1332	-1.86e-06	0.00144269	0.000177294	0.0142107
CRTAM	37.2769	5.32617	1.78717	0.000177613	0.0142107
EVI5	467.837	-9.35e-07	0.00144269	0.000178185	0.0142107
TRIM53BP	70.1825	-4.97e-07	0.00144269	0.000183916	0.0145969
C21ORF116	22.6017	-5.55e-07	0.00144269	0.000189555	0.0149721
TPTE	4.64588	-2.24e-06	0.0014427	0.000191538	0.0150563
NRP2	19.5737	-1.79e-06	0.0014427	0.000195987	0.0153328
SPTLC3	83.1226	-7.75e-07	0.00144269	0.00019981	0.0155577
CA10	17.5332	-1.1e-06	0.00144269	0.000201369	0.0156052
DCC	68.3484	-4.66e-07	0.00144269	0.000203291	0.015632
SNTA1	37.1805	4.28351	1.47892	0.000204266	0.015632
RPL3P8	10.2616	-2.34e-06	0.0014427	0.00020457	0.015632
CCR10	8.1841	2.75983	0.970196	0.000206048	0.015672
CNBD1	76.9331	-6.29e-07	0.00144269	0.000207355	0.0156988
IRGM	17.2798	1.13e-06	0.00144269	0.000214726	0.0161823
BAI2	23.8853	3.96392	1.3727	0.00021582	0.0161904
KRT8	5.8186	3.16701	1.10764	0.000219541	0.0163221
NTPCR	857.046	-0.794929	0.304768	0.000219562	0.0163221
ABCA17P	94.7304	-2.12539	0.872698	0.000228452	0.0168545
SLC9A3R1	3630.81	1.18627	0.427503	0.000228776	0.0168545
MDH1B	44.3711	-2.03163	0.818067	0.000230969	0.0169401
ZBED2	2518.86	-1.45e-06	0.00144269	0.000234346	0.0171001
DSCAM	23.7991	-8.66e-07	0.00144269	0.000235232	0.0171001
KLHL1	42.8232	-1.15e-06	0.00144269	0.000237482	0.0171876
RBBP5	1816.23	-0.465247	0.17866	0.000242648	0.0174845
IRF2BPL	759.407	1.41198	0.511489	0.000245922	0.017643
LRCH2	44.8226	-5.08e-07	0.00144269	0.000263869	0.0188267
FAM65B	890.812	2.44251	0.877843	0.000264713	0.0188267
ESRRG	17.0602	-1.15e-06	0.00144269	0.000266181	0.0188495
SCN4B	5.61908	2.38e-06	0.00144269	0.000268894	0.0189599
PITPNM2	68.2273	2.26949	0.825474	0.000275412	0.0193128
TRMT10A	445.028	-2.44e-05	0.00144274	0.00027625	0.0193128
HECW2	2308.41	-1.19e-06	0.00144269	0.000278221	0.0193546
FAM63A	25.1215	3.28398	1.18873	0.000279204	0.0193546
IGFBP6	11.9443	4.43041	1.59684	0.000282029	0.0194683
LARGE	72.4872	-6.12e-07	0.00144269	0.000284402	0.0195499
JPH4	95.8793	-2.35e-06	0.0014427	0.000288277	0.0197337
TTC29	34.7728	-6.97e-07	0.00144269	0.00029196	0.0199029
DDX43	63.5081	2.68287	0.978393	0.000294028	0.0199611
CNTN3	5.5091	-1.53e-06	0.00144269	0.000302251	0.0204349
CLDN18	4.84119	-2.77e-06	0.0014427	0.000309195	0.0208187
OLFM1	10.5971	-9.74e-07	0.00144269	0.000313038	0.0209915
SORCS2	43.5045	-1.37e-06	0.00144269	0.000317107	0.0211743
SORBS1	185.738	-7.2e-06	0.0014427	0.000318342	0.0211743
C11orf63	24.0756	5.78281	2.20982	0.000326178	0.021608
FBN2	24.5931	-6.98e-07	0.00144269	0.00034646	0.0228594
CPEB2	614.866	-3.44e-06	0.0014427	0.0003696	0.0242886
CAMK1G	48.0361	-7.51e-07	0.00144269	0.000373386	0.0243956
RANBP3L	58.3666	-1.78e-06	0.00144269	0.000374198	0.0243956
NRCAM	289.862	-4.95e-07	0.00144269	0.000377114	0.0244886
CECR6	7.55306	2.63718	1.00486	0.000379117	0.0245217
STEAP1B	8.43345	-1.08e-06	0.00144269	0.000381889	0.0246041
PTAFR	61.5909	2.56188	0.971879	0.000386694	0.0248019
CYP19A1	853.609	-1.53e-06	0.00144269	0.000387979	0.0248019
TUBG2	105.362	3.2654	1.23438	0.000392119	0.0249695
ZNF577	54.8721	6.69e-07	0.00144269	0.000393973	0.0249907
RAB8A	2757.85	1.86e-05	0.00144272	0.000400518	0.0253081
FGD4	84.7892	-4.52e-08	0.00144269	0.000402304	0.0253236
ANKRD36BP2	27.534	-1.71e-06	0.00144269	0.000410474	0.0257392
HOMER3	6.61603	3.93813	1.50752	0.000421968	0.0263145
CYTH1	1667.73	1.05962	0.419347	0.000422852	0.0263145
DLEU2	710.466	1.3974	0.547687	0.000426651	0.0263973
PTH2R	5.56518	-1.52e-06	0.00144269	0.000427395	0.0263973
CDH8	90.807	-3.88e-07	0.00144269	0.000432379	0.026553
CXorf65	54.7714	1.0977	0.437866	0.000433345	0.026553
HYALP1	22.2958	-7.65e-07	0.00144269	0.000434765	0.026553
CALHM2	96.9645	1.37102	0.54193	0.000438959	0.0267099
STAT3	6907.37	-0.783517	0.342326	0.00044633	0.0270581
EFHD2	2898.09	1.17788	0.467277	0.000452572	0.0273357
FAM5B	86.3692	-2.75e-06	0.0014427	0.00045746	0.0275297
IL28RA	46.5017	8.4e-07	0.00144269	0.000470569	0.0282153
RHOT1P3	30.2161	-1.34e-06	0.00144269	0.000474842	0.0283333
SLC8A1	62.4443	-1.7e-06	0.00144269	0.000477267	0.0283333
RHOBTB3	14.6708	2.20963	0.871406	0.000477711	0.0283333
TMEM139	64.7249	-4.09e-06	0.0014427	0.000498441	0.0294564
NMUR2	45.6249	-7.51e-07	0.00144269	0.000503555	0.029652
PTCHD4	47.2657	-5.38e-07	0.00144269	0.000509646	0.0298008
DPF3	393.625	1.2832	0.519067	0.000509711	0.0298008
KIR3DL3	8.46745	5.00133	2.03652	0.000513984	0.0299441
MIR4523	9.56316	1.91204	0.774195	0.000518345	0.0300711
MS4A8B	220.728	-2.65e-07	0.00144269	0.000519824	0.0300711
FCGR2A	35.0969	-2.41e-06	0.0014427	0.00052618	0.030332
LIMCH1	99.2351	-1.3e-06	0.00144269	0.000536925	0.0307947
KLHL13	105.224	-9.46e-07	0.00144269	0.000537957	0.0307947
SPP1	3043.61	2.22e-06	0.0014427	0.000540658	0.0308419
NBPF14	505.643	-4.54e-06	0.00144269	0.000548421	0.0310031
SLC35F4	17.3455	-1.35e-06	0.00144269	0.00054845	0.0310031
GTSF1	414.308	-2.91e-07	0.00144269	0.00054953	0.0310031
NRXN1	50.5404	-1.54e-06	0.00144269	0.000551033	0.0310031
COL22A1	7.61542	-1.5e-06	0.00144269	0.000553273	0.0310229
ARHGAP24	32.4109	-6.29e-07	0.00144269	0.000558642	0.0312175
DDC	22.6309	-1.87e-06	0.00144269	0.000568937	0.031685
LINC00092	8.68799	2.74903	1.11464	0.000573237	0.0317308
CACNA2D4	59.7371	2.9363	1.17506	0.000573622	0.0317308
BAGE2	16.0925	-9.07e-07	0.00144269	0.000578398	0.031879
CDC20P1	67.0654	-9.36e-07	0.00144269	0.000580873	0.031879
FRMPD3	49.3073	-8.23e-07	0.00144269	0.000583906	0.031879
CAPG	169.753	1.34e-06	0.00144269	0.000584064	0.031879
PTPRD	128.671	-9.61e-07	0.00144269	0.000588132	0.0319314
FRG2B	28.0574	-7.99e-07	0.00144269	0.00058891	0.0319314
COL1A1	195.58	-1.5e-06	0.00144269	0.000592546	0.0320228
POU2F2	94.3526	2.19583	0.894384	0.000594874	0.0320432
C14orf37	31.7566	-1.07e-06	0.00144269	0.000605983	0.0324431
BCL6	2609.38	-2.37e-06	0.00144269	0.000606247	0.0324431
ABI3BP	92.1396	-3.43e-06	0.0014427	0.000611382	0.0326117
MLK4	592.147	-6.73e-07	0.00144269	0.000623208	0.0331349
TMC1	4.29065	-5.55347	1.07968	0.000636998	0.0336595
FAM212A	12.3615	2.44155	1.01549	0.000638321	0.0336595
PIGS	1617.17	1.0651	0.44932	0.00063922	0.0336595
HIVEP1	2890.62	-7.41e-06	0.0014427	0.000654547	0.0343564
AIF1	19.5531	3.14905	1.29067	0.000658748	0.0344668
GAD1	22.5275	3.25897	1.35262	0.00066734	0.0348055
PCDH15	1275.21	-9.7e-07	0.00144269	0.000675798	0.0351351
MT2A	1124.69	-1.69e-05	0.00144274	0.000681685	0.0353293
IL9	404.809	-5.68e-07	0.00144269	0.000685256	0.0354027
NOXA1	30.8034	3.66185	1.52196	0.000691697	0.0355141
HKDC1	25.731	4.23454	1.74557	0.000691734	0.0355141
KYNU	237.391	-1.3e-06	0.00144269	0.00069399	0.0355189
ZSCAN23	42.9771	-4.25e-07	0.00144269	0.000703373	0.0358873
SMAD1	54.2668	-6.27e-07	0.00144269	0.000714024	0.0363179
HSBP1L1	27.1129	0.907399	0.398506	0.000723388	0.0366807
PRKD1	29.886	-6.18e-07	0.00144269	0.000727566	0.0367399
KRTAP13-4	14.3504	-6.99e-07	0.00144269	0.000729029	0.0367399
SEC31A	3907.65	-0.720013	0.344418	0.000731267	0.03674
LIX1	66.7188	-1.35e-06	0.00144269	0.000735899	0.03686
LRRC4C	30.5049	-1.02e-06	0.00144269	0.000740878	0.0369966
OR51B4	24.9255	-1.51e-06	0.00144269	0.000753512	0.0375135
LINC00460	17.6726	-6.44e-07	0.00144269	0.000771517	0.0382938
TCHHL1	53.9522	-7.72e-07	0.00144269	0.000777572	0.038417
CTNNA3	96.9649	-2.08e-06	0.0014427	0.000778676	0.038417
RPL22L1	1931.66	-1.23064	0.630109	0.000789355	0.0388273
C22orf34	36.9413	-5.53e-07	0.00144269	0.000797807	0.0391259
STARD13	20.1189	-4.29e-06	0.0014427	0.000860618	0.0420806
GRIA1	67.4312	-4.34e-07	0.00144269	0.000868147	0.0423228
GPR137B	14.7712	1.61e-07	0.00144269	0.000873827	0.0424737
TMEM184B	655.352	-0.322717	0.15597	0.000882827	0.0427638
TMPRSS11D	69.4119	-7.04e-07	0.00144269	0.000885002	0.0427638
FADS2	666.943	-2.22e-06	0.00144269	0.000900463	0.0433833
FAM53A	24.3158	1.85104	0.824037	0.000915687	0.0439878
DDX4	444.825	-1.74e-06	0.00144269	0.000921392	0.0441328
ARHGAP29	18.149	-7.59e-07	0.00144269	0.000928195	0.0443294
DGKI	97.4419	-7.36e-07	0.00144269	0.000955178	0.0454859
DNAH5	47.434	-6.96e-07	0.00144269	0.000958292	0.0455023
RNF19BPX	7.86321	-9.21e-07	0.00144269	0.000961118	0.0455049
NEDD9	2026.13	1.97494	0.882256	0.000975049	0.0460318
PCDHGB6	7.35688	2.58877	1.15517	0.000986553	0.0464415
MAOA	173.811	-8.31e-07	0.00144269	0.00100291	0.0469398
VILL	20.952	3.78068	1.68852	0.00100513	0.0469398
TJP2	506.699	1.06e-06	0.00144269	0.00100571	0.0469398
NRG1	10.43	-8.43e-07	0.00144269	0.00101872	0.0472993
FJX1	43.0838	-7.72e-07	0.00144269	0.00102015	0.0472993
PPBPP2	8.24693	-8.82e-07	0.00144269	0.00102205	0.0472993
PABPC1P2	3.5633	-1.59e-06	0.00144269	0.0010278	0.0473821
ITGB2	2737.18	3.89066	1.73327	0.00103147	0.0473821
FAM20C	12.1308	9.01e-07	0.00144269	0.00103249	0.0473821
ISCU	2540.94	-1.04e-05	0.0014427	0.00104419	0.0477856
OR52D1	21.7219	-8.86e-07	0.00144269	0.00105009	0.0479218
PYCARD	125.098	3.76786	1.70425	0.00105613	0.0480576
PDE4DIP	6426.17	-1.95305	1.285	0.00105891	0.0480576
FAM115D	17.098	-3.87e-06	0.0014427	0.0010794	0.0488309
ARNT2	8.53667	-8.44e-07	0.00144269	0.0010819	0.0488309
XIRP2	29.118	-8.92e-07	0.00144269	0.00109014	0.0490684
CD300A	38.2892	4.59e-07	0.00144269	0.0011057	0.0496328
ASIC1	46.2583	-2.42e-06	0.0014427	0.00111522	0.0499235
CNTN4	15.7765	-7.75e-07	0.00144269	0.00112124	0.0500565
GNPNAT1	1225.59	0.824785	0.397752	0.00113235	0.0502954
ZNF221	7.99467	6.11e-07	0.00144269	0.00113271	0.0502954
ADRBK2	168.631	-1.68e-06	0.00144269	0.00114634	0.0507635
GIMAP4	1480.41	4.12665	1.89678	0.00115902	0.0510956
CPNE2	24.4303	2.13312	0.996461	0.00116006	0.0510956
PRMT6	340.033	0.702664	0.342633	0.00116529	0.0511888
UNC79	19.584	-2.39e-06	0.00144269	0.00117564	0.0515058
VCL	1536.09	1.07562	0.516521	0.00118828	0.051808
PAH	15.1257	-1.27e-06	0.00144269	0.00118885	0.051808
TRIM29	16.835	-1.11e-06	0.00144269	0.00120562	0.0523997
CPM	73.0983	-3.32e-06	0.0014427	0.00120917	0.0524153
GNG11	69.7762	7.99e-07	0.00144269	0.00121789	0.0526546
PDGFRA	1661.05	-8.95e-06	0.00144271	0.0012213	0.0526633
FCHO2	119.761	1.70714	0.80975	0.00123061	0.0529258
ZNF93	64.18	2.78328	1.30497	0.00124098	0.0532327
THEMIS2	108.613	1.83412	0.869938	0.0012487	0.0534244
TGFB2	8.96217	-4.22e-06	0.0014427	0.00127066	0.0540931
PLCB4	38.1882	-7.77e-07	0.00144269	0.00127092	0.0540931
SLC6A8	62.9858	1.97656	0.943045	0.00127566	0.0541546
CACNA1E	40.8441	-1e-06	0.00144269	0.00129846	0.0549803
NBPF8	427.684	-6.97e-06	0.0014427	0.00130787	0.0552365
CNTNAP1	40.4867	1.73333	0.839853	0.00131664	0.0554645
VGLL3	27.4865	-1.66e-06	0.00144269	0.00132403	0.0556129
KDELR3	72.2231	1.56887	0.763828	0.00132694	0.0556129
HBS1L	3906.22	-0.694909	0.399146	0.00133331	0.0557377
DZIP1L	16.0935	-1.18e-06	0.00144269	0.00134206	0.0559613
MTR	5790.47	-0.567804	0.32021	0.00135732	0.0563316
COL5A1	26.11	-7.47e-07	0.00144269	0.00135898	0.0563316
ANKRD22	187.279	-8.6e-07	0.00144269	0.00136123	0.0563316
CXorf30	31.542	-1.36e-06	0.00144269	0.00141722	0.0584669
LHFPL2	355.627	-1.87e-06	0.00144269	0.00141995	0.0584669
CES3	226.87	-1.09719	0.679576	0.00142674	0.0585999
ABCD1	321.95	1.35368	0.673818	0.00143082	0.058621
CD22	101.861	-5.35e-07	0.00144269	0.00144358	0.0589963
PINLYP	55.5596	-1.44e-06	0.00144269	0.00145421	0.0592836
BDNF	38.0619	-1.27e-06	0.00144269	0.0014634	0.059495
PHLDA3	14.6021	-7.72e-07	0.00144269	0.00146664	0.059495
PRSS33	9.89551	2.93799	1.43185	0.00147941	0.0598649
C2orf66	9.89008	-1.91e-06	0.00144269	0.00148755	0.0599804
CDC42BPG	10.5173	3.70716	1.82667	0.00148956	0.0599804
RTN1	15.0267	-9.4e-07	0.00144269	0.00150516	0.0604605
DQX1	17.7497	-3.38e-06	0.0014427	0.00153221	0.0613824
LIPM	7.31893	-8.59e-07	0.00144269	0.00153847	0.0613824
ANKRD26P4	3.37505	-2.43e-06	0.00144269	0.00153932	0.0613824
IDH2	2017.58	1.45762	0.739035	0.00159077	0.0632805
MIR3615	19.9799	1.33088	0.691129	0.00160906	0.0637223
JUP	21.3293	2.6281	1.31592	0.00160964	0.0637223
ANKFN1	85.8436	-1.6e-06	0.00144269	0.00161473	0.0637624
GYS2	66.8038	-7.35e-07	0.00144269	0.00161841	0.0637624
MAPRE3	33.4066	1.54222	0.793511	0.00162281	0.0637825
MYO3B	1108.58	-3.05e-06	0.0014427	0.0016303	0.063924
NPR3	25.0484	-1.35e-06	0.00144269	0.00163807	0.0640757
SH3PXD2B	22.4472	-2.32e-06	0.00144269	0.00164421	0.0641632
JUNB	10538.6	-5.31e-06	0.0014427	0.00169017	0.0658006
CTNNA2	7.1473	-1.15e-06	0.00144269	0.0017021	0.0661084
SPATA31E1	13.9409	-5.99e-07	0.00144269	0.00171196	0.0663346
SNX18P25	3.66505	-1.35e-06	0.00144269	0.00172296	0.0664642
LPAR5	7.16612	2.33209	1.19781	0.0017234	0.0664642
ITGA5	39.078	-7.15e-07	0.00144269	0.00173199	0.0666391
VAT1	240.917	1.52216	0.797057	0.00175755	0.0674645
TDRKH	1293.94	-1.07e-05	0.00144271	0.00177166	0.0678474
SYN2	19.5581	-1.09e-06	0.00144269	0.00177748	0.0679121
PGAP1	3146.26	-3.05e-06	0.0014427	0.00180609	0.0688345
LGALS9C	49.7836	3.22532	1.68486	0.00181	0.0688345
CACNB4	101.054	-1.85e-06	0.00144269	0.00182983	0.069428
TJP3	23.3825	3.25298	1.69195	0.00183508	0.0694665
PIK3C2G	12.9258	-1.07e-06	0.00144269	0.00184044	0.069486
NEBL	63.03	-6.88e-07	0.00144269	0.00184405	0.069486
ARL10	33.1819	0.931217	0.514532	0.00186901	0.0702654
EEF1A1P14	11.348	4.04e-07	0.00144269	0.00188593	0.0707398
FMNL2	365.613	-1.6e-06	0.00144269	0.00189309	0.0708464
NR1H3	144.867	1.23095	0.667617	0.00190038	0.0709578
RORC	242.59	-7.36e-07	0.00144269	0.00191111	0.0711964
NOX5	160.186	-5.23e-07	0.00144269	0.00197241	0.073314
CYP4F3	95.8761	-1e-06	0.00144269	0.00200893	0.0745027
YAP1	6.81381	-1.73e-06	0.00144269	0.00201866	0.0745933
SLC50A1	1809.34	-9.58e-06	0.0014427	0.00202045	0.0745933
SUZ12P	436.509	0.782491	0.445737	0.00203221	0.0747528
ACSBG1	39.5191	1.80478	0.981773	0.00203387	0.0747528
HOXB6	6.50421	-1.9e-07	0.00144269	0.00204349	0.0749385
SYCP2	605.101	-1.29e-06	0.00144269	0.00205354	0.0751393
TNS3	617.188	-6.28e-07	0.00144269	0.00209835	0.0765269
KRT86	238.7	2.03888	1.11082	0.00210077	0.0765269
FAM50B	100.349	8.72e-07	0.00144269	0.00212615	0.0771217
SCAND3	18.4597	3.61604	1.99815	0.00212649	0.0771217
SLC8A1-AS1	118.971	-9.71e-07	0.00144269	0.00213419	0.0772303
C10orf55	11.2653	1.98e-06	0.00144269	0.00215406	0.0777783
DUSP5P1	101.354	-3.23e-06	0.00144269	0.00217062	0.0782042
THSD7B	101.255	-6.19e-07	0.00144269	0.00220633	0.0793169
DTX4	6.09959	-2.6e-06	0.00144269	0.00222017	0.0795963
RAB3D	28.6255	1.64514	0.937786	0.00222379	0.0795963
SERPINA1	179.706	-1.55e-06	0.00144269	0.00223581	0.0798523
RSL24D1P3	2.65731	1.57e-06	0.00144269	0.00225379	0.0803202
RGS1	5405.56	-2.03e-06	0.00144269	0.00226413	0.0805138
SYNC	285.219	0.425748	0.261571	0.00227148	0.0805672
NTSR1	7.92724	4.83e-07	0.00144269	0.00227544	0.0805672
IL22RA1	13.7271	1.19e-06	0.00144269	0.00228367	0.0805837
FAM103A1	534.314	0.833366	0.492691	0.00228664	0.0805837
KIFAP3	4155.65	-1.42e-06	0.00144269	0.00229062	0.0805837
SND1	7633.72	-0.587668	0.405264	0.00232358	0.0815684
TNFRSF8	5043.97	-2.19e-06	0.00144269	0.00235796	0.082599
SF3A3P2	18.0934	-3.35e-06	0.0014427	0.00238022	0.0832014
APBA2	373.039	3.29327	1.89382	0.00239691	0.0836069
RXRA	37.7692	2.09878	1.20619	0.00241735	0.0841414
ABLIM3	10.6368	-6.21e-07	0.00144269	0.00243795	0.0846788
GORAB	670.691	-7.33e-06	0.0014427	0.00245684	0.0851547
POGZ	2862.65	-1.29e-05	0.0014427	0.00246267	0.0851774
SCRN1	19.3253	-1.39e-06	0.00144269	0.00248249	0.0856824
CD274	467.45	-4.08e-06	0.0014427	0.00250919	0.0863322
ADAMTSL5	23.3576	6.49e-07	0.00144269	0.00251183	0.0863322
DNAJA4	42.4449	1.39086	0.833008	0.00252205	0.0865025
ZBED6	2656.58	-7.41e-06	0.0014427	0.00253184	0.0866573
MCHR1	3.20969	-3.01e-06	0.0014427	0.0025648	0.0874689
CYGB	16.5423	-2.03e-06	0.00144269	0.00256619	0.0874689
KEL	8.67675	-3.14e-06	0.00144269	0.00258336	0.0876537
STC1	382.577	-5.08e-07	0.00144269	0.00258371	0.0876537
FCRL6	26.0057	3.57728	2.17921	0.00258829	0.0876537
TMEM132D	18.6381	-4.68e-07	0.00144269	0.00259451	0.0876537
PNPLA4	44.0675	5.47e-07	0.00144269	0.00260773	0.0876537
HCG22	10.2828	-8.36e-07	0.00144269	0.00261035	0.0876537
CORO6	24.1157	2.40859	1.44345	0.00261043	0.0876537
IRAK4	1442.66	-0.555621	0.445352	0.00261488	0.0876537
TYW5	1116.11	-0.558086	0.448252	0.00261963	0.0876537
MPDZ	5.18909	-2.16e-06	0.00144269	0.00262979	0.0878147
SPRTN	1157.75	-0.362295	0.264045	0.0026447	0.0881334
ARHGEF10	90.5686	-1.43e-06	0.00144269	0.00265241	0.0882115
BIRC2	2281.98	-0.476548	0.378027	0.00266469	0.088287
EPB49	23.1498	3.26289	2.02115	0.00266543	0.088287
COL25A1	5.84124	-2.18e-06	0.00144269	0.00271155	0.089634
ZNF20	28.3595	3.6722	2.28195	0.00272305	0.0897288
WDR72	27.2991	-3.6e-07	0.00144269	0.00272534	0.0897288
RAC3	56.7764	1.43433	0.894542	0.00281607	0.0924149
ZFP42	499.331	-6.63e-07	0.00144269	0.00281818	0.0924149
DACH2	8.40001	-6.8e-07	0.00144269	0.00282482	0.0924481
SLC5A8	3.55971	-1.2e-06	0.00144269	0.00283261	0.0925188
CPQ	122.053	-8.19e-07	0.00144269	0.0028709	0.0935835
STX12	1211.17	-0.464047	0.395921	0.00289264	0.0941053
EDA	14.9329	-6.4e-07	0.00144269	0.00289887	0.0941217
C1QA	143.604	-3.31e-07	0.00144269	0.00292654	0.0948326
MAPK11	422.257	-2.76e-06	0.00144269	0.00294918	0.0953781
CLEC4F	731.218	-6.89e-07	0.00144269	0.00297896	0.096152
LINGO4	9.6661	-1.14e-06	0.00144269	0.00299226	0.0963918
C16orf45	48.0534	-1.16e-06	0.00144269	0.00299962	0.09644
IRAK2	140.441	1.82383	1.15382	0.00300928	0.0965614
RGS21	8.41859	-6.7e-07	0.00144269	0.00302758	0.0968196
SMAGP	26.2501	1.4989	0.968457	0.00302911	0.0968196
C9orf72	586.055	-7.57e-06	0.0014427	0.00304063	0.0969992
SERPINB2	2.80846	-1.66e-06	0.00144269	0.00305466	0.0972579
KCNAB2	3291.41	1.36e-06	0.00144268	0.00309714	0.0983531
IFRD1	2876.18	-0.531172	0.520072	0.00310103	0.0983531
ZC3H11A	10906.1	-0.402923	0.370616	0.00313978	0.0993901
THSD4	169.819	-5.08e-07	0.00144269	0.00316166	0.0998901
IMPDH1P4	13.8618	-5.2e-07	0.00144269	0.00325193	0.102545
GIMAP7	197.656	3.09174	2.08027	0.00325872	0.102562
CALCRL	115.644	-2.51e-06	0.00144269	0.00330566	0.103841
THUMPD1	3486.36	-1.61e-05	0.0014427	0.00335698	0.105252
LCE1F	7.36541	-7.09e-07	0.00144269	0.0033741	0.10545
NOTCH2NL	1835.66	-7.73e-06	0.0014427	0.00337613	0.10545
THRA	296.23	2.02229	1.34247	0.0033963	0.105727
CMC1	596.838	0.55739	0.420075	0.0033992	0.105727
MMAA	248.953	-7.53e-06	0.0014427	0.00340431	0.105727
SATB1	4026.18	-2.13e-06	0.00144269	0.00353015	0.109276
RRAD	19.128	-1.55e-06	0.00144269	0.00353191	0.109276
CNOT4	1234.59	-0.336854	0.329832	0.00354034	0.109331
CHGA	5.16151	1.34058	0.969379	0.00355674	0.109632
AFF2	37.852	-5.98e-07	0.00144269	0.00356469	0.109671
FAM105B	2620.26	-1.31e-05	0.0014427	0.00358812	0.110185
ATF3	2337.8	-3.61e-06	0.00144269	0.00362298	0.111048
RAB11FIP4	469.509	2.56864	1.79568	0.00365312	0.111586
SYNGR3	19.0531	-5.29e-08	0.00144269	0.00365409	0.111586
SNX30	927.051	0.530672	0.425773	0.00367135	0.111905
SLC25A21	113.208	-5.51e-07	0.00144269	0.00369791	0.112505
SLC2A5	10.3143	1.49e-06	0.00144269	0.00373069	0.113293
C20orf118	65.6993	1.01592	0.771044	0.00376265	0.114053
ARL14EPL	47.1791	-8.33e-07	0.00144269	0.00377049	0.11408
GPR87	61.6612	-1.02e-06	0.00144269	0.00377847	0.114111
SLC35D1	1385.85	-7.52e-06	0.0014427	0.00380235	0.114481
OR51B5	21.9002	-3.89e-07	0.00144269	0.00380465	0.114481
ERMN	933.149	-1.3e-06	0.00144269	0.00383819	0.115279
CHD5	58.1974	1.49797	1.10094	0.00385457	0.11556
DRAP1	2217.18	0.339309	0.293027	0.00386325	0.115609
GCK	2.30634	-1.5e-06	0.00144269	0.00387631	0.115789
CMPK1	5797.45	-1.21e-05	0.0014427	0.00392924	0.117157
ATRNL1	10.7291	-7.06e-07	0.00144269	0.00398979	0.118747
ROBO1	623.487	3.45929	3.02202	0.00401036	0.119015
CSTA	1083.22	-6.22e-07	0.00144269	0.00401328	0.119015
TXNDC16	548.647	0.443335	0.390632	0.00404183	0.119646
NCKAP5	69.1685	-1.14e-06	0.00144269	0.00406267	0.120046
PPP1R15B	6754.3	-0.435009	0.571092	0.00410309	0.121023
KLHL4	622.082	-1.41e-06	0.00144269	0.00413962	0.121881
ZFR2	9.52941	1.48e-06	0.00144269	0.00416517	0.122414
NAPSB	284.625	-6.4e-07	0.00144269	0.00422873	0.123866
LRWD1	1306.59	1.25616	0.966682	0.00422966	0.123866
GPC5	7.4372	-8.81e-07	0.00144269	0.00427581	0.124995
NEURL	73.6443	-3.64e-07	0.00144269	0.00434749	0.126865
ERVV-1	19.6759	-3.8e-07	0.00144269	0.00435535	0.126869
KIF5C	29.5551	-1.5e-07	0.00144269	0.00437592	0.127242
C12orf39	20.2854	-1.31e-06	0.00144269	0.00440848	0.127963
SBF2-AS1	107.102	2.02399	1.64855	0.0044176	0.128001
CTAGE6P	6.44394	-1.55e-06	0.00144269	0.00444514	0.128572
SORT1	410.664	2.40203	1.99727	0.00446984	0.128983
ZNF174	328.621	0.623031	0.582451	0.00447502	0.128983
DAB2IP	526.465	-1.27e-06	0.00144269	0.00449018	0.129156
PDCD1	8.42164	-4.4e-07	0.00144269	0.00449675	0.129156
ST5	248.397	-1.55e-06	0.00144269	0.0045306	0.129734
DKK2	15.1599	-1.11e-06	0.00144269	0.0045422	0.129734
SPRR3	6.61177	-9.48e-07	0.00144269	0.00454413	0.129734
CTSZ	460.963	1.63e-06	0.00144269	0.00454845	0.129734
ARMC7	241.239	0.321405	0.360463	0.00457219	0.129907
FAM171B	6.29243	-1.43e-06	0.00144269	0.00457606	0.129907
KIAA0226L	13.4431	-8.03e-07	0.00144269	0.00457825	0.129907
USP12	2449.73	-1.71e-05	0.00144274	0.00459494	0.13
STEAP1	306.8	-4.49e-07	0.00144269	0.00459736	0.13
FAM198B	8.80061	-9.83e-07	0.00144269	0.00464622	0.131094
EPRS	15318.9	-9.94e-06	0.00144269	0.00465199	0.131094
ZSWIM7	201.588	0.686167	0.67337	0.00466223	0.131157
KLRF1	22.2226	2.52092	2.36681	0.00468698	0.131628
NPM1P11	21.2198	-4.61e-07	0.00144269	0.00472232	0.132347
HLF	274.355	-6.14e-07	0.00144269	0.00473475	0.132347
ANXA8L1	20.3956	-3.6e-07	0.00144269	0.00473675	0.132347
CNTD1	202.208	-1.84e-06	0.00144269	0.00475271	0.132567
ARHGEF17	21.4251	1.0067	0.966795	0.00480409	0.13372
RERGL	19.3299	-3.35e-07	0.00144269	0.0048103	0.13372
LGALS3BP	200.536	1.94332	1.74801	0.00485583	0.134758
C10orf112	27.3003	-8.76e-07	0.00144269	0.00487398	0.135033
LPA	33.1931	-5.25e-07	0.00144269	0.004913	0.135885
LINC00470	26.473	-3.52e-07	0.00144269	0.00493731	0.136328
OR51I1	7.52389	-5.77e-07	0.00144269	0.00497059	0.137001
STK32A	50.1522	-4.5e-07	0.00144269	0.00497838	0.137001
NTS	15.9009	-5.46e-06	0.0014427	0.00499051	0.137103
ZNF358	137.528	-3.74e-07	0.00144269	0.00499875	0.137103
CCDC90B	1688.61	-9.58e-06	0.00144268	0.00503243	0.137796
SH3BP1	1941.66	0.61021	0.714135	0.00506202	0.138149
YY1AP1	3070.47	-1.35e-05	0.00144269	0.00506211	0.138149
MTND2P32	5.79934	-3.43e-06	0.00144269	0.00507129	0.13817
hsa-mir-142	494.649	0.413845	0.554924	0.00508699	0.138368
C1orf173	64.0357	1.95777	2.0113	0.0051417	0.139625
OR51I2	8.77	-7.49e-07	0.00144269	0.00518058	0.140281
TNPO3	3817.58	2.71e-05	0.0014428	0.00518293	0.140281
ASH1L	5359.28	-9.46e-06	0.00144269	0.00519827	0.140464
PRR3	1043.41	-1.12e-05	0.0014427	0.00520889	0.14052
RGS9BP	30.7198	1.35186	1.42973	0.00521804	0.140536
FAM167B	2.74513	3.28e-06	0.0014427	0.00525952	0.141244
C19orf81	25.9549	-5.18e-07	0.00144269	0.0052615	0.141244
ZNF101	1431.72	0.814006	0.944301	0.00529139	0.141814
IL1RAPL1	23.9302	-6.34e-07	0.00144269	0.0053038	0.141916
THSD1	44.1935	0.941193	1.1432	0.00531709	0.14204
PILRA	44.3177	1.43648	1.56034	0.00534262	0.142343
TM7SF3	3266.61	-6.96e-06	0.0014427	0.00534577	0.142343
EXTL2	952.874	-1.13e-06	0.00144269	0.00535738	0.142421
MMP16	7.57613	-1.36e-06	0.00144269	0.00537784	0.142596
TMEM145	5.33513	1.72e-06	0.00144269	0.00538132	0.142596
CYBB	11.1737	1.52e-06	0.00144269	0.00539588	0.142613
COL5A2	755.384	2.36051	2.94049	0.00539932	0.142613
OR51B3P	4.90914	-7.81e-07	0.00144269	0.00545969	0.143976
FSTL1	10.346	-2.43e-06	0.00144269	0.00549429	0.144657
PLXND1	75.0177	1.31e-06	0.00144269	0.0055201	0.145104
MEMO1P1	6.57893	1.32557	1.92413	0.00554268	0.145464
OR51M1	5.06293	-6.76e-07	0.00144269	0.00556875	0.145915
POU3F1	11.9001	1.26e-06	0.00144269	0.00561184	0.146571
SGCE	201.513	2.2651	5.24637	0.00561326	0.146571
ADAM28	279.804	-1.3e-06	0.00144269	0.00562054	0.146571
LSAMP	172.217	-4.2e-07	0.00144269	0.0056535	0.147068
CHML	2581.73	-8.36e-06	0.00144269	0.00565749	0.147068
B3GALT2	82.0274	-7.86e-06	0.00144269	0.00571536	0.148146
KIAA0586	2685.58	-1.12e-05	0.00144271	0.00571764	0.148146
HERC2P5	8.57955	-7.25e-07	0.00144269	0.00572603	0.148146
FHIT	33.653	-6.85e-07	0.00144269	0.00573513	0.148149
ZBTB20	106.397	-1.62e-06	0.00144269	0.00577699	0.148995
TRIM49	5.26122	-7.23e-07	0.00144269	0.00585908	0.150876
KLHDC10	790.566	-8.94e-06	0.00144269	0.00592998	0.152232
IQSEC2	15.2491	-1.22e-06	0.00144269	0.00593316	0.152232
OSBPL10	156.989	-1.72e-06	0.00144269	0.00593956	0.152232
B4GALT4-AS1	1.62386	-1.75e-06	0.00144269	0.00595139	0.152298
RAB3GAP1	2180.53	-5.42e-06	0.00144269	0.00596641	0.152445
HSD11B1	114.451	-3.34e-07	0.00144269	0.00597927	0.152516
EVA1B	15.1985	1.8236	3.29107	0.00599137	0.152516
TSPAN7	176.334	-4.66e-07	0.00144269	0.00600626	0.152516
TACR3	9.58362	-6.75e-07	0.00144269	0.00600633	0.152516
ESYT2	7453.51	0.834977	1.17533	0.00602467	0.152746
GBA3	37.0587	-2.97e-07	0.00144269	0.00603419	0.152752
TXK	404.444	1.79e-06	0.00144269	0.00616328	0.155779
CCDC64B	6.38012	-1.25e-06	0.00144269	0.00619177	0.156039
PLEKHA2	2637.79	7.11e-06	0.00144269	0.00619255	0.156039
ZNF804A	52.0245	-8.61e-07	0.00144269	0.00625313	0.157127
SEC61G	1031.24	-5.81e-06	0.00144268	0.00625487	0.157127
VAMP8	165.725	2.16e-06	0.00144269	0.00629015	0.157772
PIGQ	335.687	-1.01e-05	0.00144269	0.00632631	0.158316
KCTD11	153.923	6.13e-06	0.0014427	0.00633108	0.158316
ANKRD20A4	9.72539	-1.29e-06	0.00144269	0.00634434	0.158375
TRIM9	149.556	-1.24e-06	0.00144269	0.0063533	0.158375
PREX2	11.1808	-6.08e-07	0.00144269	0.00637194	0.158375
ZXDA	12.2751	8.22e-07	0.00144269	0.00638131	0.158375
NSL1	1898.12	-3.15e-05	0.00144283	0.00638165	0.158375
CDHR1	6.83568	1.16e-06	0.00144269	0.00644531	0.159517
TRIM49C	2.92842	-1.06e-06	0.00144269	0.00644708	0.159517
VAV2	223.207	1.29e-06	0.00144269	0.00652665	0.161243
DCAF8	3301.48	-1.59e-05	0.00144271	0.00658249	0.162342
MRGPRX2	5.26194	-7.98e-07	0.00144269	0.00659092	0.162342
TMCC2	622.995	-1.7e-06	0.00144269	0.00660111	0.16235
KLRG1	64.785	4.22e-06	0.00144269	0.00668573	0.163998
GPR171	2753.3	3.26e-06	0.0014427	0.00668811	0.163998
THBS3	371.912	-3.9e-06	0.00144269	0.00671889	0.164508
HLA-DRB5	2266.72	-8.35e-07	0.00144269	0.00673083	0.164555
DCUN1D3	731.253	-6.76e-06	0.00144269	0.00683146	0.166767
GADD45A	920.033	-3.56e-06	0.00144269	0.00685964	0.167206
SDAD1P1	81.4774	-4.43e-06	0.00144269	0.00688231	0.16751
ZNF562	1439.66	7.32e-06	0.00144269	0.00702193	0.17051
NLGN4X	31.1251	-6.25e-07	0.00144269	0.0070263	0.17051
MIEN1	729.552	1.17e-05	0.00144268	0.00704498	0.170711
GATAD2A	4023.21	8.75e-06	0.00144269	0.0070833	0.171387
LONRF2	153.827	-1.53e-06	0.00144269	0.00709582	0.171437
TGM4	38.9698	-2.07e-06	0.00144269	0.00711712	0.171699
IPO9	4743.81	-1.01e-05	0.00144269	0.00714025	0.172005
FAM69B	26.28	6.6e-06	0.00144269	0.00719779	0.173137
DNAH3	27.0897	-1.98e-06	0.00144269	0.00724412	0.173408
SMAP2	8140.52	-3.72e-06	0.00144269	0.00724845	0.173408
MLANA	70.8245	-3.52e-06	0.00144269	0.00725303	0.173408
PSORS1C1	10.3323	-2.1e-06	0.00144269	0.00725801	0.173408
XDH	79.6264	-5.94e-07	0.00144269	0.00726183	0.173408
ZNF703	3.45553	2.52e-06	0.00144269	0.00729695	0.173994
RNASE11	5.63664	-6.31e-07	0.00144269	0.00735391	0.175098
CCDC110	10.7054	8.58e-07	0.00144269	0.00739297	0.17567
TUSC3	20.8583	-2.58e-06	0.00144269	0.00740959	0.17567
ITGAD	437.589	2e-06	0.0014427	0.00741003	0.17567
MPP4	9.31651	3.08e-06	0.00144269	0.00750038	0.177556
NBPF10	1323.27	-2.45e-06	0.00144269	0.00755415	0.178571
XRCC4	510.09	1.05e-05	0.00144269	0.00758266	0.178988
DHRS2	2999.91	-1.07e-06	0.00144269	0.00761543	0.17927
CCBP2	125.137	-1.71e-06	0.00144269	0.00761644	0.17927
SAP30BP	1721.02	2.76e-05	0.00144268	0.00763934	0.179324
NVL	1524.07	-4.97e-05	0.00144311	0.00764057	0.179324
DUSP16	1199.2	-2.57e-06	0.00144269	0.00767089	0.179662
ADORA2B	25.9563	3.31e-06	0.00144269	0.00767685	0.179662
CXorf59	38.7734	-1.58e-06	0.00144269	0.00772847	0.180613
ATP5A1P5	3.0793	-9.57e-07	0.00144269	0.00785804	0.183052
RPL31	11590.4	-1.22e-05	0.00144269	0.00787843	0.183052
SSH3	67.6948	3.38e-06	0.00144269	0.00787924	0.183052
DHRS1	250.458	1.11e-05	0.00144269	0.00788187	0.183052
CHRAC1	1272.37	-1.02e-05	0.00144269	0.00788854	0.183052
UBXN4	4195.76	-1.13e-05	0.00144269	0.00794273	0.184036
TMEM143	284.789	-5.41e-06	0.00144269	0.00795335	0.184036
MRPL41	515.958	9.36e-06	0.00144269	0.00799067	0.18464
SOCS2-AS1	70.6935	4.07e-06	0.0014427	0.00803608	0.185428
KREMEN2	26.7446	3.3e-06	0.00144269	0.00805826	0.185475
KDELR1	1540.01	-7.59e-06	0.00144268	0.00806071	0.185475
COL4A1	6.86217	-1.35e-06	0.00144269	0.00808294	0.185727
SORBS3	30.9661	2.45e-06	0.00144269	0.00814899	0.186751
HTR3B	10.7772	-4.42e-07	0.00144269	0.00815023	0.186751
SGMS2	45.4792	-9.43e-07	0.00144269	0.0081734	0.186948
CDH19	4.69876	-1.15e-06	0.00144269	0.00819451	0.186948
PXN	1586.63	2.53e-06	0.00144269	0.00819511	0.186948
PLK3	380.795	-4.24e-06	0.00144269	0.00820436	0.186948
RGAG4	8.5008	1.48e-06	0.00144269	0.0082764	0.188328
RPH3AL	15.2648	1.78e-06	0.00144269	0.00834645	0.189659
OXLD1	504.833	1.39e-05	0.0014427	0.00840784	0.190634
FBXO39	11.6571	1.68e-06	0.00144269	0.00841253	0.190634
SOX13	2.92065	-9.74e-07	0.00144269	0.00848132	0.191928
PLCL2	1228.88	1.24e-05	0.0014427	0.00852561	0.19244
FADS1	1098.3	-1.99e-06	0.00144269	0.00852736	0.19244
ACBD3	3034.54	-1.03e-05	0.00144269	0.00856463	0.192778
PTPRE	849.722	4.33e-06	0.00144269	0.0085658	0.192778
MTTP	108.939	-1.73e-06	0.00144269	0.00862431	0.193829
ATP2B4	7906.46	-4.52e-06	0.00144269	0.00864993	0.193961
PCDH18	84.1036	-9.36e-07	0.00144269	0.00865382	0.193961
NBPF2P	1.28666	1.64e-06	0.00144269	0.00872285	NA
NAALAD2	142.908	-2.17e-06	0.00144269	0.00872402	0.195268
SDSL	3.2798	9.92e-08	0.00144269	0.00874128	0.195388
SPATA12	23.7913	1.4e-06	0.00144269	0.00877254	0.195648
MACROD2-AS1	7.51155	-7.05e-07	0.00144269	0.00877673	0.195648
REPS2	209.225	-9.36e-07	0.00144269	0.00882271	0.196407
TEX19	2340.84	8.21e-07	0.00144269	0.00883633	0.196444
DELEC1	98.612	-5.38e-07	0.00144269	0.0088748	0.19695
VWA5A	252.737	1.63e-05	0.00144274	0.00889036	0.19695
KIAA0528	1200.9	-1.17e-05	0.00144269	0.00889505	0.19695
ORMDL2	517.241	-1.54e-05	0.00144271	0.00890837	0.196979
TCTE3	13.6264	5.59e-06	0.00144269	0.00895048	0.197644
LINC00630	143.392	-6.33e-06	0.00144269	0.00897267	0.197868
DIEXF	2178.97	-1.38e-05	0.00144271	0.00905701	0.199461
GNPDA1	266.508	2.5e-06	0.0014427	0.00910419	0.200231
EMP1	1140.03	-3.5e-06	0.0014427	0.00913275	0.200591
GBAP1	202.256	-6.97e-06	0.00144269	0.0091718	0.201007
COL7A1	69.4249	-6.87e-06	0.0014427	0.00917615	0.201007
FAT1	115.098	1.39e-06	0.00144269	0.00921337	0.201553
GAS8	153.735	-1.95e-06	0.00144269	0.00923872	0.201839
LZTS2	213.729	5.26e-06	0.00144269	0.0093645	0.204315
CFHR1	13.7766	-1.32e-06	0.00144269	0.00944245	0.205548
ANKRD18DP	18.9891	-6.69e-07	0.00144269	0.00944601	0.205548
FABP6	55.9778	-6.99e-07	0.00144269	0.00946372	0.205661
MYOM2	38.2707	1.45e-06	0.00144269	0.00948066	0.205747
PRPF3	3064.18	8.16e-06	0.00144268	0.00949273	0.205747
THEM5	283.581	-1.49e-07	0.00144269	0.00952485	0.206171
ZNF572	17.9724	4.69e-07	0.00144269	0.00954369	0.206307
NFIX	15.8024	-1.95e-06	0.00144269	0.00973821	0.210235
CERS2	4040.5	-1.63e-05	0.00144272	0.00977948	0.210849
MLEC	5054.47	-1.88e-05	0.00144273	0.00981208	0.211275
IKZF2	2217.53	1.9e-06	0.00144269	0.00987136	0.212273
PDE8B	100.25	1.35e-05	0.00144272	0.0100007	0.214773
PTPN3	468.641	2.65e-06	0.00144269	0.0100346	0.215189
SBK1	115.607	2.94e-06	0.00144269	0.0100463	0.215189
GHDC	280.403	4.01e-06	0.00144269	0.010101	0.21608
FBXW9	99.9858	8.14e-06	0.0014427	0.0101224	0.216256
NBEA	46.175	-5.92e-08	0.00144269	0.0101413	0.216377
ZNF594	477.073	4.24e-06	0.00144269	0.0102534	0.218486
KIAA1211L	11.0629	-1.35e-06	0.00144269	0.0103248	0.219523
TNFRSF9	1393.7	-6.04e-06	0.0014427	0.0103288	0.219523
MIPEPP2	8.12934	-4.75e-07	0.00144269	0.0103569	0.219756
LINC00672	27.9787	5.09e-06	0.00144269	0.0103665	0.219756
B3GALTL	353.983	-3.84e-06	0.00144269	0.0104835	0.221731
PGBD2	557.727	-3.96e-06	0.00144269	0.0104963	0.221731
C1orf192	114.129	-2.87e-06	0.0014427	0.0105001	0.221731
PLA2G2F	11.4778	-9.65e-07	0.00144269	0.0105328	0.222134
LINC00106	3.57935	3.44e-06	0.00144269	0.0105833	0.222855
DENND1B	2221.07	-1.07e-05	0.00144269	0.0105941	0.222855
EEF1A1P25	8.01831	-3.92e-06	0.00144269	0.0106232	0.223105
IGSF11	5.95918	-1.45e-06	0.00144269	0.0106331	0.223105
YIF1B	916.271	-8.1e-06	0.00144269	0.0106476	0.223123
PGF	19.2078	-1.73e-06	0.00144269	0.010717	0.224292
ANKRD36B	850.299	-7.66e-06	0.00144269	0.0107312	0.224304
ZNF514	107.082	4.48e-06	0.0014427	0.010796	0.225106
ADAMTS20	23.5956	-9.18e-07	0.00144269	0.010797	0.225106
RHPN1	18.8871	-1.33e-06	0.00144269	0.0108309	0.225528
ZNF34	128.64	-8.89e-06	0.00144269	0.010851	0.225659
SLC7A4	2.76454	1.45e-06	0.00144269	0.0109036	0.226466
PAK3	3.33232	-1.17e-06	0.00144269	0.0109376	0.226886
TYW1B	240.023	3.24e-06	0.00144269	0.0109967	0.227825
C1QL4	26.8466	2.42e-06	0.00144269	0.0110569	0.228782
SCN3B	42.9029	-2.23e-06	0.00144269	0.0111346	0.229942
CNTNAP2	27.2753	-5.93e-07	0.00144269	0.0111409	0.229942
AHDC1	250.94	4.94e-06	0.0014427	0.011162	0.230089
ATP7B	351.209	2.48e-06	0.00144269	0.0111983	0.230217
TRIM31	3.06294	-8.54e-07	0.00144269	0.0112092	0.230217
PDE6A	12.0597	3.97e-06	0.00144269	0.0112139	0.230217
ZFR	8378.43	-2.02e-05	0.00144268	0.0112243	0.230217
HLA-DPB2	37.1321	-1.19e-06	0.00144269	0.0112733	0.230933
GREM1	24.8586	-5.05e-07	0.00144269	0.0113446	0.231834
PCDHGA9	8.21973	2.42e-06	0.00144269	0.0113681	0.231834
EGFR	3.82345	-1.03e-06	0.00144269	0.0113736	0.231834
STARD4-AS1	38.5606	-2.98e-06	0.00144269	0.0113737	0.231834
LRRIQ1	12.0573	-1.75e-06	0.00144269	0.0114047	0.232178
SLC4A9	4.25348	2.01e-06	0.00144269	0.011438	0.232558
CFTR	21.0581	-1.5e-06	0.00144269	0.0114559	0.232558
ADCK2	435.134	1.01e-05	0.00144269	0.0114658	0.232558
JPH2	3.10332	1.58e-06	0.00144269	0.0114876	0.232586
DHRS9	6.71373	-7.95e-07	0.00144269	0.0114959	0.232586
STARD3	673.408	1.44e-05	0.00144268	0.011525	0.232586
OR4F13P	2.08021	-1.16e-06	0.00144269	0.011528	0.232586
ASB14	81.5403	-1.24e-05	0.00144271	0.0115486	0.232586
FLNC	4.07298	-2.38e-06	0.00144269	0.011566	0.232586
CSF1R	159.932	-4.85e-06	0.0014427	0.0115663	0.232586
DCAF8L1	6.19976	-7.04e-07	0.00144269	0.0116141	0.233261
FBXO28	1865.24	-7.65e-06	0.00144269	0.0116924	0.233394
KLF2	164.469	2.18e-06	0.00144269	0.011696	0.233394
FAM171A1	3.67688	-8.46e-07	0.00144269	0.0117076	0.233394
GRIN2A	26.5252	-4.62e-07	0.00144269	0.0117085	0.233394
DPEP1	23.0457	-2.77e-07	0.00144269	0.0117186	0.233394
KRT81	291.996	2e-06	0.00144269	0.011727	0.233394
ABCG1	117.69	2.66e-07	0.00144269	0.0117304	0.233394
KIAA0284	9.89023	-8.8e-07	0.00144269	0.0117458	0.233394
RRM2B	4579.75	-8.21e-06	0.0014427	0.0117486	0.233394
MARK2	1231.12	8.95e-06	0.00144269	0.0117857	0.233849
EGF	6.70595	-9.73e-07	0.00144269	0.0118356	0.234329
NAV1	159.502	-1.16e-05	0.00144272	0.0118384	0.234329
PDE1A	2.05383	-2.57e-06	0.0014427	0.0118803	0.234731
PLCH1	20.5056	-7.11e-07	0.00144269	0.0118975	0.234731
KIAA0922	1311.42	7.64e-06	0.00144269	0.0119103	0.234731
C4orf45	5.98166	-2.13e-06	0.00144269	0.0119158	0.234731
IKZF3	1421.89	-6.43e-07	0.00144269	0.0119643	0.235141
OR2T34	6.28238	-1.24e-06	0.00144269	0.0119697	0.235141
ITPKA	17.4998	1.4e-06	0.00144269	0.0119796	0.235141
CMAS	1277.75	-7.12e-06	0.00144269	0.0120114	0.235484
RPL41P1	54.4184	-6.57e-06	0.00144269	0.0121505	0.237488
NBPF9	400.856	-7.21e-06	0.0014427	0.0121758	0.237488
CDH23	7.63525	3.81e-06	0.00144269	0.012199	0.237488
HAX1	5480.44	-8.29e-06	0.00144269	0.0122124	0.237488
EHHADH	57.1529	1.95e-06	0.00144269	0.0122165	0.237488
HLA-DQB1-AS1	71.831	-1.94e-06	0.00144269	0.0122223	0.237488
FRMPD2	4.77613	-1.54e-06	0.00144269	0.0122484	0.237488
ZNF138	622.868	9.18e-06	0.00144268	0.0122522	0.237488
KLHL6-AS1	2.94031	-2.96e-06	0.00144269	0.0122532	0.237488
BAX	1971.64	-2.08e-06	0.00144269	0.0122582	0.237488
PPID	3451.69	-3.94e-06	0.00144269	0.0122949	0.237578
RRAGD	20.568	1.82e-06	0.00144269	0.012315	0.237578
TERF1P2	6.18335	-7e-07	0.00144269	0.0123201	0.237578
SNX18	2028.76	4.18e-06	0.00144269	0.0123262	0.237578
FCGBP	50.4521	2.82e-06	0.00144269	0.0123495	0.237578
PLG	3.66992	-7.22e-07	0.00144269	0.0123621	0.237578
ZNF620	71.8127	6.33e-06	0.0014427	0.0123641	0.237578
FAM13A	43.9699	-3.04e-06	0.00144269	0.0125307	0.240498
MDM4	4333.42	8.99e-06	0.0014427	0.0126023	0.241591
OR51Q1	6.9152	-2.67e-07	0.00144269	0.0126394	0.241758
MON2	2094.17	-9.49e-06	0.00144269	0.0126533	0.241758
OTUD5	4122	-2.38e-06	0.00144269	0.0126552	0.241758
NR1H2	912.964	-9.03e-06	0.00144269	0.012742	0.243134
STRA6	302.594	-8.34e-07	0.00144269	0.0127797	0.243571
LRRC45	512.563	7.49e-06	0.00144269	0.0128037	0.243745
LINC00476	125.565	6.27e-06	0.00144269	0.0128721	0.244242
TP53BP2	4910.51	-6.06e-06	0.00144269	0.0128736	0.244242
PRKAB1	713.528	-7.63e-06	0.00144268	0.0128836	0.244242
IFNG	4004.03	-5.01e-06	0.0014427	0.0129067	0.244242
SYDE2	49.6121	1.39e-06	0.00144269	0.0129294	0.244242
ATXN7	2199.32	-7.63e-05	0.00144368	0.0129415	0.244242
TMEM204	6.06868	3.32e-06	0.00144269	0.0129519	0.244242
ARF4	2700.42	-8.72e-06	0.00144269	0.0129612	0.244242
RCSD1	3309.85	5.34e-06	0.00144269	0.0129821	0.244242
SLCO3A1	306.937	2.25e-06	0.0014427	0.0129877	0.244242
TEX264	826.91	-1.93e-05	0.0014427	0.0129933	0.244242
NFIB	117.22	-1.22e-07	0.00144269	0.0130815	0.245017
IRF7	696.969	4.82e-06	0.0014427	0.0130975	0.245017
XXYLT1	304.57	6.67e-06	0.00144269	0.0131068	0.245017
CORO7	971.206	7.01e-06	0.00144269	0.0131076	0.245017
RIMKLBP2	67.8584	-5.17e-06	0.00144269	0.0131092	0.245017
DCSTAMP	2.63298	-1.36e-06	0.00144269	0.0131499	0.245499
SLC35E2	52.4238	6.09e-06	0.00144269	0.0131789	0.245763
LUC7L3	5954.5	0.00011055	0.0014448	0.0132229	0.246302
LINC00461	7.84783	1.33e-06	0.00144269	0.0133245	0.247915
ENPEP	406.119	1.51e-06	0.00144269	0.0133608	0.247938
TEAD3	31.3023	4.28e-06	0.0014427	0.0133709	0.247938
FCGR3B	13.6823	2.48e-06	0.00144269	0.0133752	0.247938
POLK	1035.2	5.98e-06	0.0014427	0.0133861	0.247938
RUFY4	25.6022	-1.64e-06	0.00144269	0.013479	0.249378
KLHL12	2839.58	1.04e-05	0.00144269	0.0135148	0.249758
LITAF	1674.07	-4.54e-06	0.00144269	0.0136361	0.251711
TEK	4.75725	-8.13e-07	0.00144269	0.013658	0.251711
PRKCB	3781.47	-7.23e-07	0.00144269	0.0136665	0.251711
INPP4B	1613.9	-2.62e-06	0.00144269	0.0137482	0.252523
ZBED1	900.069	7.09e-06	0.00144269	0.0137497	0.252523
SCG5	10.9211	3.44e-06	0.00144269	0.0137566	0.252523
RNF157	5130.55	3.46e-06	0.00144269	0.0138447	0.253856
P2RX6	9.83485	2.95e-06	0.00144269	0.0139612	0.255707
PPM1AP1	4.94984	-2.09e-06	0.00144269	0.0140682	0.257379
GRK6	1557.56	6.98e-06	0.00144269	0.0140867	0.257431
ZNF673	274.649	-5.85e-06	0.00144269	0.0141459	0.258141
ATXN10	1485.96	1.22e-05	0.0014427	0.014157	0.258141
TMC8	1958.99	3.02e-06	0.00144269	0.0142263	0.259118
GOLT1B	1562.77	-9.91e-06	0.00144269	0.0142811	0.259827
CROCCP3	97.5031	4.08e-06	0.00144269	0.0143324	0.26001
ARL1	1708.58	-1.16e-05	0.00144269	0.0143345	0.26001
TRHDE	24.7041	-4.08e-07	0.00144269	0.0143386	0.26001
TNFRSF1B	3392.69	3.58e-06	0.00144269	0.0143723	0.26033
GID4	289.009	6.18e-06	0.00144269	0.014388	0.26033
FLRT3	814.797	-6.49e-07	0.00144269	0.0144535	0.261019
PRR5L	124.861	-7.87e-07	0.00144269	0.0144578	0.261019
IGHD	14.9044	1.25e-06	0.00144269	0.0145207	0.261866
FAM120C	342.13	1.07e-05	0.00144269	0.0145477	0.262066
LRP1	129.979	-2.52e-06	0.00144269	0.0146419	0.263211
DISC1FP1	12.9323	-8.47e-07	0.00144269	0.0146433	0.263211
ZNF460	2283.32	-1.14e-06	0.00144269	0.0146693	0.263235
LMOD1	7.53854	-2.76e-06	0.00144269	0.0146905	0.263235
DERL3	87.6325	-4.43e-06	0.00144269	0.0146927	0.263235
MIIP	1057.18	-9.73e-06	0.0014427	0.0147239	0.263395
NCK2	1610.79	7.48e-07	0.00144269	0.0147337	0.263395
LPAR6	1426.26	3.49e-06	0.0014427	0.0147587	0.263555
DPYSL3	3.99586	-8.98e-07	0.00144269	0.0148574	0.26503
VPS8	1972.32	-1.1e-05	0.00144269	0.0148924	0.265365
CRB1	11.6998	-1.63e-06	0.00144269	0.0149208	0.265474
BAALC	8.73012	-1.64e-06	0.00144269	0.0149308	0.265474
EIF2C2	1733.42	1.01e-05	0.0014427	0.0149482	0.265486
BACH2	444.471	-1.13e-06	0.00144269	0.0149638	0.265486
LIME1	20.4877	6.46e-06	0.0014427	0.0150713	0.267105
COL9A3	7.11149	1.99e-06	0.00144269	0.0151143	0.267578
OR51K1P	6.4184	-4.78e-07	0.00144269	0.0151711	0.268295
MYO1G	12814.6	-3.35e-06	0.00144269	0.0152454	0.269319
MPZ	857.299	-6.15e-07	0.00144269	0.0153045	0.269856
PAK6	2.94045	2.52e-06	0.00144269	0.0153086	0.269856
STMN4	3.94926	-8.89e-07	0.00144269	0.0153743	0.27044
RUNDC3A	10.2043	3.73e-06	0.00144269	0.0153747	0.27044
LCE3D	6.42874	-6.54e-07	0.00144269	0.0154306	0.271134
RSBN1L-AS1	74.2148	7.92e-06	0.00144269	0.0155402	0.272767
SGK223	105.551	4.44e-06	0.0014427	0.0155653	0.272916
AQP4	10.8217	-4.59e-07	0.00144269	0.0156595	0.274076
PLEKHH1	12.9665	6.27e-06	0.0014427	0.0156648	0.274076
CDH11	9.41643	-4.9e-07	0.00144269	0.0158193	0.276485
RSPH1	2.35238	-8.87e-07	0.00144269	0.0159027	0.277647
PCDHGA11	5.80687	3.35e-06	0.00144269	0.0159986	0.279025
RPS15A	19055.8	-1.53e-05	0.00144268	0.0160833	0.280203
CTH	880.844	-2.2e-06	0.00144269	0.0161692	0.281402
ENDOD1	2904	5.42e-06	0.0014427	0.0161946	0.281546
RNF115	2065.92	-1.12e-05	0.00144268	0.0162123	0.281557
WISP2	17.8872	-3.41e-06	0.00144269	0.0163277	0.283261
MDM2	23915.1	-2.54e-06	0.00144269	0.0163532	0.283403
OR51B6	3.31782	-6.98e-07	0.00144269	0.0163711	0.283414
EIF3G	4830.47	-0.000102379	0.00144444	0.016453	0.284524
SFTPA2	23.0516	-9.54e-07	0.00144269	0.0164698	0.284524
VHL	2047.46	8.4e-06	0.00144269	0.016496	0.284678
PALD1	10.0306	8.5e-07	0.00144269	0.0167583	0.2889
IL15	249.987	-2.7e-06	0.00144269	0.0167792	0.288939
COMMD3	1157.65	-1.1e-05	0.0014427	0.0167957	0.288939
CASR	26.3221	-5.82e-07	0.00144269	0.0168921	0.290292
BLMH	2295.98	5.95e-06	0.00144269	0.0169516	0.291012
ST3GAL5	435.114	3.5e-07	0.00144269	0.01697	0.291023
LHB	4.3397	3.51e-06	0.00144269	0.0170207	0.291438
SMARCA5	7614.76	-1.05e-05	0.00144268	0.0170297	0.291438
MCAM	17.6534	2.83e-06	0.00144269	0.0170907	0.291948
TTBK1	2.75474	-2.05e-06	0.00144269	0.017095	0.291948
GJA1	278.337	-6.69e-07	0.00144269	0.0171193	0.29206
SLC44A2	984.393	5.04e-06	0.00144269	0.0172396	0.293806
JDP2	2.10679	-9.39e-07	0.00144269	0.0172747	0.293979
PRKAG1	1940.59	-1.01e-05	0.0014427	0.0172905	0.293979
CRAT	156.037	1.55e-06	0.00144269	0.0173034	0.293979
ACVR1	313.676	6.45e-06	0.0014427	0.0173705	0.294814
PRR7	72.1151	3.83e-06	0.00144269	0.0174201	0.295171
TNFRSF11B	3.15578	-6.91e-07	0.00144269	0.0174275	0.295171
AURKAPS1	39.0342	-6.72e-06	0.00144269	0.0174577	0.295378
ARL11	1.70688	2.41e-06	0.00144269	0.0174818	0.295482
IFFO2	1586.75	-4.9e-06	0.00144269	0.0175483	0.296301
SERPINB10	107.46	-6.46e-07	0.00144269	0.0176059	0.296803
TERF1	1356.17	1.87e-05	0.00144273	0.0176141	0.296803
HERPUD1	2462.78	-6.3e-06	0.00144269	0.0176525	0.296846
SNX4	1885.99	-7.82e-05	0.00144373	0.0176529	0.296846
TMEM39A	1184.12	-9.92e-06	0.00144269	0.0177011	0.297352
ACSM1	6.24973	-1.09e-06	0.00144269	0.0178513	0.29957
PDCD1LG2	61.211	-1.3e-06	0.00144269	0.0179111	0.300267
ELF2	1421.08	3.63e-05	0.00144288	0.0179699	0.300946
CHRNA5	229.101	5.72e-06	0.00144269	0.0181088	0.302585
STAT5A	4335.05	-2.58e-07	0.00144269	0.0181213	0.302585
P2RX5	647.263	2e-06	0.00144269	0.0181231	0.302585
TNFSF15	7.53697	1.43e-06	0.00144269	0.0182134	0.303785
SLC35G1	302.472	-3.59e-06	0.00144269	0.0182329	0.303801
PCDHGA6	21.0059	3.72e-06	0.00144269	0.0183428	0.305324
TPRG1L	345.53	-1.25e-06	0.00144269	0.0183992	0.305944
ITPK1-AS1	13.8947	5.18e-06	0.00144269	0.0184257	0.305944
PHLDB1	12.6897	2.53e-06	0.00144269	0.018436	0.305944
GLI4	247.225	-5.16e-06	0.00144269	0.0185074	0.306508
HNRNPA3P2	8.26457	4.56e-06	0.00144269	0.0185217	0.306508
RPS27L	2741.22	-3.8e-06	0.00144269	0.0185259	0.306508
CYP4F2	16.8302	-6.03e-07	0.00144269	0.0186413	0.307722
CTXN3	30.3174	-4.65e-07	0.00144269	0.0186474	0.307722
TXNRD3	18.7166	-2.52e-07	0.00144269	0.0186555	0.307722
FAM49B	4580.67	8.08e-06	0.0014427	0.0187344	0.308714
RNF19A	4608.57	-5.62e-06	0.00144269	0.0187852	0.30924
SAMD13	18.2809	3.71e-06	0.00144269	0.0189439	0.311371
SOX6	45.4374	-1.5e-06	0.00144269	0.0189809	0.311371
ECE1	991.746	5.29e-06	0.00144269	0.0189826	0.311371
KIF9	98.3099	7.35e-06	0.00144269	0.0189904	0.311371
FATE1	2.97192	-1.02e-06	0.00144269	0.0190614	0.312169
BTN2A2	1025.76	-3.65e-06	0.00144269	0.0190829	0.312169
ARHGAP40	2.29207	-8.45e-07	0.00144269	0.0191077	0.312169
SKIV2L	1398.9	3.14e-06	0.00144266	0.0191151	0.312169
SIGLEC12	6.4226	9.39e-07	0.00144269	0.0191506	0.312438
FAM181A	1.68237	2.82e-06	0.00144269	0.0192041	0.31276
APOBEC3A	10.1293	1.49e-06	0.00144269	0.0192084	0.31276
PSMD10	945.414	-1.01e-05	0.0014427	0.0192522	0.313163
CELF5	11.9431	1.77e-06	0.00144269	0.0193855	0.314859
MMP7	2.76736	-1.1e-06	0.00144269	0.0194138	0.314859
TRIM35	1178.35	-6.16e-06	0.00144269	0.019414	0.314859
VWA7	15.476	-3.36e-07	0.00144269	0.0194807	0.315346
SPEF2	118.108	-7.5e-07	0.00144269	0.0194824	0.315346
GPS1	2007.43	4.57e-06	0.00144267	0.0195098	0.315479
C22orf43	7.17049	1.78e-06	0.00144269	0.0195594	0.315888
MUM1L1	5.44688	-4.74e-07	0.00144269	0.0195753	0.315888
IGF1	1007.81	-2.01e-06	0.0014427	0.0195928	0.315888
SHROOM3	39.9524	-1.03e-06	0.00144269	0.0196235	0.316074
GGT3P	6.31766	-5.8e-07	0.00144269	0.019674	0.316577
ZSCAN10	3.04648	2.66e-06	0.00144269	0.0197094	0.316836
TFG	2611.77	2.7e-07	0.00144268	0.0197771	0.317612
STARD10	195.878	4.6e-06	0.00144269	0.0198624	0.318322
DUSP8	16.026	-7.08e-07	0.00144269	0.0198675	0.318322
MBLAC1	53.3077	3.25e-06	0.00144269	0.0198794	0.318322
TRGV1	1.58102	2.05e-06	0.00144269	0.0199287	0.318802
C17orf66	20.2755	3.53e-06	0.00144269	0.0199938	0.319531
PXDN	11.6157	-5.43e-07	0.00144269	0.020014	0.319543
IFI27L1	284.142	1.2e-05	0.00144269	0.02005	0.319807
ATL3	2778.89	-4.52e-06	0.0014427	0.0200966	0.320239
TMEM92	40.8912	-1.86e-06	0.00144269	0.020207	0.321686
CLIP1	3973.19	-5.01e-07	0.00144268	0.0202374	0.321731
TSPAN19	4.38757	-7.25e-07	0.00144269	0.0203291	0.321731
DNAJC2	3028.61	5.78e-06	0.00144269	0.0203461	0.321731
SH3TC1	100.717	9.72e-07	0.00144269	0.0203792	0.321731
PKD1P5	91.354	-6.84e-06	0.0014427	0.0204036	0.321731
KCNQ2	3.81835	-5.83e-07	0.00144269	0.020423	0.321731
ADAMTS5	4.98769	-5.06e-07	0.00144269	0.0204257	0.321731
FBXW2	1031.53	6.28e-05	0.0014433	0.0204368	0.321731
MADD	1803.84	9.48e-06	0.00144269	0.0204385	0.321731
LRRTM2	45.3464	-8.09e-07	0.00144269	0.0204655	0.321731
ZNF433	11.281	1.45e-06	0.00144269	0.0204708	0.321731
IL6	504.361	-5.18e-06	0.0014427	0.0204791	0.321731
C4orf33	776.059	-4.82e-06	0.00144269	0.0204836	0.321731
RPS2P46	102.61	-6.11e-06	0.00144269	0.0204839	0.321731
MAST4	1914.03	-1.8e-06	0.00144269	0.0206	0.323181
ZNF277	1078.31	-6.02e-06	0.00144269	0.0206156	0.323181
ZNF137P	4.4483	-5.28e-07	0.00144269	0.0206401	0.323257
UPK1B	18.9623	-1.23e-06	0.00144269	0.0207064	0.323729
ERV3-1	271.312	5.31e-06	0.00144269	0.0207149	0.323729
TECRL	5.53032	-6.22e-07	0.00144269	0.0207464	0.323729
TREX1	322.002	9.55e-06	0.00144269	0.0207517	0.323729
DIXDC1	135.756	1.93e-06	0.00144269	0.0207795	0.323729
ZRANB2-AS2	9.47729	-3.06e-06	0.00144269	0.0208084	0.323729
KRT15	5.00601	-1.22e-06	0.00144269	0.02081	0.323729
PRRT1	2.93149	-3.17e-07	0.00144269	0.0208447	0.323729
CCDC71L	2531.88	-2.06e-06	0.00144269	0.0208531	0.323729
NACAD	2.12426	-9.35e-07	0.00144269	0.0208673	0.323729
UFSP1	19.7292	3.29e-06	0.00144269	0.0210406	0.32611
AGXT2L2	1232.45	-8.65e-06	0.00144269	0.0211095	0.32664
ADC	22.0445	3.14e-06	0.00144269	0.0211146	0.32664
WRAP73	1153.98	8.31e-06	0.0014427	0.0211432	0.326775
GBP1	2656.9	8.08e-07	0.00144269	0.0212079	0.327091
PAOX	24.289	1.68e-06	0.00144269	0.0212113	0.327091
CADPS	5.10049	-1.43e-06	0.00144269	0.0212234	0.327091
JAK2	812.501	-6.7e-06	0.00144269	0.0213033	0.327609
RAB28	727.626	-1.07e-05	0.0014427	0.0213192	0.327609
PCDHGB2	40.0768	3.99e-06	0.00144269	0.0213354	0.327609
SLC18B1	187.937	2.32e-06	0.00144269	0.021345	0.327609
TPCN2	217.334	1.24e-06	0.00144269	0.0213567	0.327609
BATF	1328.69	-1.31e-05	0.00144272	0.0213922	0.327765
UMODL1	94.4064	-6.06e-07	0.00144269	0.0214068	0.327765
ALS2CR12	50.4255	4.79e-06	0.00144269	0.0214631	0.328273
HLA-DOB	207.244	-3.93e-06	0.0014427	0.0214799	0.328273
SWT1	381.989	-7.34e-06	0.00144269	0.0215625	0.329067
MIR4500HG	4.61731	-6.58e-07	0.00144269	0.0215719	0.329067
TRGV8	9.51676	-9.99e-07	0.00144269	0.0216202	0.329498
ZNF337	1015.03	-4.27e-06	0.00144269	0.0216656	0.329884
COBLL1	61.4646	-7.27e-07	0.00144269	0.0217835	0.331371
KLHL6	2641.25	1.11e-05	0.00144271	0.0218576	0.331815
C8orf31	12.6428	-2.94e-07	0.00144269	0.0218698	0.331815
CMTM2	7.51222	3.1e-06	0.00144269	0.0218733	0.331815
SH3TC2	6.30649	-9.78e-07	0.00144269	0.0219747	0.332789
SBSPON	31.7629	6.04e-06	0.00144269	0.021978	0.332789
MEP1B	23.3025	-9.43e-07	0.00144269	0.0220046	0.332885
ZNF461	67.8924	2.17e-06	0.00144269	0.0220312	0.332982
PTK7	22.5815	2.15e-06	0.00144269	0.0221081	0.333609
ZBED5	1261.69	-2.17e-05	0.00144274	0.0221134	0.333609
APLF	756.61	2.39e-06	0.00144269	0.0221413	0.333725
CRMP1	13.3843	1.63e-06	0.00144269	0.0222038	0.334153
ZCCHC17	1169.85	6.95e-06	0.00144269	0.0222213	0.334153
RPS3AP49	1.50272	-1.12e-06	0.00144269	0.0222308	0.334153
TMEM52	9.66466	1.41e-06	0.00144269	0.0222655	0.334366
GFRA1	26.1664	-6.6e-07	0.00144269	0.0222856	0.334366
ACTG1P4	2.61527	-2.64e-06	0.00144269	0.0223489	0.334783
SUSD1	208.338	2.46e-06	0.00144269	0.0223542	0.334783
LRIG1	2660.79	4.5e-06	0.00144269	0.0224358	0.335699
TBX10	4.44526	-1.66e-06	0.00144269	0.0224763	0.335999
EBI3	1085.53	-1.01e-06	0.00144269	0.0225188	0.336329
HERC5	876.951	-1.29e-05	0.00144272	0.0226037	0.33729
ACOT13	1723.21	-1.58e-05	0.00144272	0.0227082	0.338444
POLE3	2808.26	6.81e-06	0.00144269	0.0227222	0.338444
DAAM1	573.493	-5.51e-06	0.00144269	0.0227831	0.338874
HOOK2	341.661	-6.34e-06	0.00144269	0.0227924	0.338874
NAP1L2	15.8543	-3.24e-07	0.00144269	0.0229211	0.339987
MSTO1	372.915	-9.69e-06	0.0014427	0.0229279	0.339987
SGOL1-AS1	5.4326	1.93e-06	0.00144269	0.0229404	0.339987
TIE1	43.0186	-9.71e-07	0.00144269	0.02295	0.339987
TNNT1	4.3157	1.42e-06	0.00144269	0.0230272	0.340823
SETD7	1376.13	-2.3e-07	0.00144269	0.0230504	0.340859
LAMA2	90.8945	-7.45e-07	0.00144269	0.0231156	0.341258
PNKP	634.144	-8.31e-06	0.00144269	0.0231385	0.341258
SCN5A	1.97581	1.66e-06	0.00144269	0.0231397	0.341258
TRIM56	1263.14	5.96e-06	0.00144269	0.023187	0.341272
TRPC6	5.03434	-4.61e-07	0.00144269	0.0231907	0.341272
ACPP	19.1579	-5.04e-07	0.00144269	0.0232029	0.341272
OR51A10P	5.80408	-4.23e-07	0.00144269	0.0232244	0.341282
MCTP1	520.106	5.48e-06	0.0014427	0.0233039	0.342144
MXD4	631.627	-5.2e-06	0.00144269	0.0234228	0.343583
LCE3E	27.0446	-4.02e-07	0.00144269	0.0234923	0.344295
KLHDC9	3.48378	-2.47e-06	0.00144269	0.0236565	0.346393
NSFL1C	1537.75	-7.93e-06	0.00144269	0.0237255	0.347094
SPRY1	115.099	1.69e-06	0.00144269	0.0237673	0.347396
XAF1	1119.57	1.88e-06	0.00144269	0.0238075	0.347441
SLC7A11-AS1	249.166	-2.05e-06	0.00144269	0.0238127	0.347441
HEPH	56.4997	-8.55e-07	0.00144269	0.0239333	0.348891
BHLHE40-AS1	131.515	-1.22e-06	0.00144269	0.0240282	0.349963
LASP1	5170.23	7.01e-06	0.00144269	0.0240774	0.350369
CDH10	14.1468	-4.45e-07	0.00144269	0.0241715	0.3511
IQUB	16.9965	-4.16e-06	0.0014427	0.0241894	0.3511
PTPRM	1214.73	-9.45e-07	0.00144269	0.0241917	0.3511
AQP9	11.9214	-6.45e-07	0.00144269	0.0242861	0.352159
KRT8P35	5.43001	-4.39e-07	0.00144269	0.0243113	0.352214
POP4	1442.82	8.3e-06	0.00144269	0.024376	0.352759
TSPAN4	148.989	4.5e-06	0.00144269	0.0243919	0.352759
R3HDM2P2	2.1374	-8.22e-07	0.00144269	0.0244846	0.353789
C9orf78	2815.72	5.51e-06	0.00144269	0.0245674	0.354428
TMEM50B	935.217	-6.96e-06	0.00144269	0.0245758	0.354428
CHURC1-FNTB	104.809	-4.17e-06	0.00144269	0.024614	0.354428
FASTKD2	1733.95	-4.91e-06	0.00144269	0.024636	0.354428
PODXL	241.773	4.08e-06	0.00144269	0.0246548	0.354428
BROX	2774.24	-9.05e-06	0.00144269	0.0246583	0.354428
USHBP1	19.5995	-2e-06	0.00144269	0.0247043	0.354779
STRADB	612.328	3.64e-06	0.00144269	0.0247761	0.3555
TRIM49B	1.75241	-9.32e-07	0.00144269	0.0248712	0.35627
KRT17	2.97135	-9.17e-07	0.00144269	0.0249189	0.35627
TMEM164	983.213	1.13e-05	0.00144271	0.0249213	0.35627
GOLGA2B	463.096	2.24e-06	0.00144269	0.0249267	0.35627
CASC4P1	2.39406	1.75e-06	0.00144269	0.0249383	0.35627
MTND2P2	7.62901	-4.99e-06	0.0014427	0.0249837	0.356517
ANKRD20A11P	18.8337	-8.28e-07	0.00144269	0.0249989	0.356517
ARPC5L	1525.39	5.55e-06	0.00144269	0.0250603	0.356854
MAK	124.696	-1.7e-06	0.00144269	0.025066	0.356854
LPHN1	220.573	2.38e-06	0.00144269	0.0251893	0.358299
TTC21B	1299.45	-8.05e-06	0.00144269	0.0252769	0.358749
SH3BP5	748.367	3.61e-06	0.00144269	0.025278	0.358749
LEO1	2055.45	1.11e-05	0.00144268	0.0252865	0.358749
SLCO4C1	34.5536	9.32e-07	0.00144269	0.0253316	0.358966
CXCR1	9.40918	1.22e-06	0.00144269	0.0253508	0.358966
ZNF260	879.298	3.68e-07	0.00144268	0.0253673	0.358966
EML5	435.758	-2.29e-06	0.00144269	0.0254362	0.359436
FAM13C	2.94873	-9.1e-07	0.00144269	0.0254596	0.359436
ZNF672	1374.03	-4.25e-06	0.00144269	0.0254662	0.359436
RSPH4A	18.1629	3.84e-06	0.00144269	0.0255291	0.360015
HYOU1	10159.8	-5.43e-06	0.00144269	0.0255975	0.360509
ALDH8A1	20.2332	-3.37e-06	0.00144269	0.025608	0.360509
IL2RG	6352.13	-3.23e-05	0.00144287	0.0256522	0.360804
OAS1	677.098	3.31e-06	0.00144269	0.0256791	0.360804
MS4A4A	10.9091	-3.76e-07	0.00144269	0.0256974	0.360804
NIPAL4	20.2558	-1.23e-06	0.00144269	0.0257168	0.360804
PLEKHG6	33.6524	2.98e-06	0.00144269	0.0258537	0.362415
EFNA5	116.979	1.53e-06	0.00144269	0.0259707	0.363745
TMEM222	548.894	6.67e-06	0.00144269	0.0260767	0.364757
ZNF850	137.36	3.78e-06	0.0014427	0.0260874	0.364757
C1orf43	5371.44	-1.39e-05	0.0014427	0.0261702	0.365604
FHOD3	103.084	-1.65e-06	0.00144269	0.026212	0.365877
ERBB3	26.4959	2.84e-06	0.00144269	0.0263347	0.367277
FAM78A	1285.47	-9.97e-05	0.00144442	0.0263677	0.367425
STAMBPL1	1260.91	-6.42e-06	0.00144269	0.0264104	0.367709
SPTLC2	2560.58	9.48e-06	0.00144268	0.026434	0.367726
AHCYL2	1379.79	-3.37e-06	0.00144269	0.026479	0.36804
WARS2	447.608	-5.67e-06	0.00144269	0.0265022	0.368051
RASA3	136.934	9.61e-07	0.00144269	0.0265471	0.368308
LRRC4	31.5895	-7.42e-06	0.00144269	0.0265655	0.368308
SOCS3	2060.34	-1.92e-06	0.00144269	0.026697	0.369761
SEMA7A	424.224	2.94e-06	0.00144269	0.0267154	0.369761
STX10	1024.59	1.31e-05	0.00144267	0.0267471	0.36989
SCARNA17	21.2393	5.8e-06	0.0014427	0.0268413	0.370804
C14orf182	784.709	-2.58e-06	0.00144269	0.0268612	0.370804
ZNF573	26.0079	1.06e-06	0.00144269	0.0268935	0.370804
NOMO3	208.93	3.09e-06	0.00144269	0.0269035	0.370804
SSBP4	1107.35	6.5e-06	0.00144269	0.0269292	0.370847
SIX4	12.1109	-3.14e-07	0.00144269	0.0270122	0.371517
CCRL2	29.6524	2.09e-06	0.00144269	0.0270231	0.371517
L3HYPDH	158.042	8.71e-06	0.00144269	0.0270892	0.372026
SLA2	609.268	1.6e-06	0.00144269	0.0271054	0.372026
PLEKHG3	2.88881	1.2e-06	0.00144269	0.027171	0.372615
SLC27A2	3438.79	-3.95e-06	0.00144269	0.0272177	0.372944
CD28	409.193	-3.91e-07	0.00144269	0.0272429	0.372978
ATP6V0D2	5.5722	-4.08e-07	0.00144269	0.0273004	0.373455
DNAJB9	890.942	-3.62e-06	0.00144269	0.0273479	0.373792
MYB	2909.61	-2.65e-06	0.00144269	0.0274009	0.373921
NMB	28.7872	1.79e-06	0.00144269	0.0274028	0.373921
SAMD4B	1175.49	-2.66e-05	0.00144279	0.0276021	0.376328
SLC25A26	397.593	-1.18e-05	0.00144269	0.0277227	0.377659
ISG20	1012.35	3.22e-06	0.00144269	0.0278434	0.378989
DET1	83.4899	4.93e-06	0.00144269	0.0279069	0.379539
SUSD4	2.9641	-8.8e-07	0.00144269	0.0279365	0.379626
TSHZ1	1048.52	4.57e-06	0.00144269	0.0280063	0.37986
SYT3	5.19984	-4.22e-07	0.00144269	0.02803	0.37986
ACAA2	3628.56	2.34e-05	0.00144277	0.0280368	0.37986
LIPE	240.685	6.75e-06	0.00144269	0.0280536	0.37986
LRRC31	39.7248	-4.56e-07	0.00144269	0.0280801	0.37986
PTP4A2P1	4.49575	3.6e-06	0.00144269	0.0280924	0.37986
CUTC	689.7	3.92e-05	0.00144295	0.028133	0.380096
KIAA1731	3942.59	-6.44e-06	0.00144269	0.0282866	0.381741
LGALS3	1149.91	1.57e-05	0.00144273	0.0283012	0.381741
GAPDHP42	22.822	-4.39e-06	0.00144269	0.028377	0.382449
NAPRT1	49.2448	-6.53e-06	0.00144269	0.0284058	0.382514
DSTYK	1099.59	-3.06e-06	0.00144269	0.0284284	0.382514
GNB4	120.125	-1.94e-06	0.00144269	0.0285361	0.383501
FERMT2	21.0181	1.77e-06	0.00144269	0.0285484	0.383501
SNHG15	1998	1.35e-06	0.00144269	0.0286124	0.384047
WDR83OS	895.801	-1.04e-05	0.00144268	0.0288596	0.387048
ARHGAP4	2939.7	7.46e-06	0.00144269	0.0289286	0.387485
SHISA4	10.1002	-2.04e-06	0.00144269	0.0289393	0.387485
SORD	271.996	2.4e-06	0.00144269	0.029087	0.388927
ENDOG	163.519	4.37e-06	0.00144269	0.0291309	0.388927
FGF22	1.58932	2.61e-06	0.00144269	0.0291432	0.388927
SNRPGP3	3.47516	-1.53e-06	0.00144269	0.0291653	0.388927
LRRN3	939.196	-1.03e-06	0.00144269	0.0291654	0.388927
hsa-mir-10a	22.2233	4.65e-06	0.00144269	0.029272	0.389749
SLC26A4-AS1	125.409	-1.37e-06	0.00144269	0.0292745	0.389749
THBS4	41.6189	-1.62e-06	0.00144269	0.0293036	0.38982
HERC2P8	9.59279	-3.18e-07	0.00144269	0.0293491	0.390051
OR51J1	4.58319	-6.12e-07	0.00144269	0.0294095	0.390051
RNF138	2355.98	6.14e-06	0.00144269	0.0294113	0.390051
C8orf76	723.007	1.1e-05	0.00144271	0.0294159	0.390051
DTX1	19.9007	-1.02e-06	0.00144269	0.0294694	0.390446
RPS11P7	2.4095	-1.04e-06	0.00144269	0.0295146	0.390729
EEF1A1P33	4.5596	-8.65e-07	0.00144269	0.0295676	0.390815
KIAA0125	6.38746	-3.84e-07	0.00144269	0.0296002	0.390815
C7orf53	27.8025	-6.08e-06	0.00144269	0.0296061	0.390815
FAM86FP	1.53158	-1.59e-06	0.00144269	0.0296772	0.390815
ABCB8	603.06	-1e-05	0.00144268	0.0296909	0.390815
HNRPCP	105.705	-4.49e-06	0.00144269	0.0297228	0.390815
HSH2D	1278.38	3.36e-06	0.00144269	0.0297277	0.390815
C21orf67	100.286	5.54e-06	0.00144269	0.0297308	0.390815
GPR183	1287.45	-1.05e-06	0.00144269	0.0297352	0.390815
BTG1	2698.91	-3.29e-06	0.00144269	0.029805	0.390964
EDNRB	5.00242	-4.09e-07	0.00144269	0.029807	0.390964
PEX6	335.654	-1.51e-06	0.00144269	0.0298312	0.390964
CNR1	1.24686	-1.54e-06	0.00144269	0.0298432	NA
GTF2F2P1	3.77581	-4.99e-07	0.00144269	0.0298557	0.390964
PCOLCE-AS1	20.1145	2.22e-06	0.00144269	0.0298673	0.390964
NDUFB4	2424.65	-9.49e-06	0.0014427	0.0298987	0.390964
ALDH1A1	82.3082	-9.22e-07	0.00144269	0.0299215	0.390964
FAM115B	48.2283	-1.25e-06	0.00144269	0.0299369	0.390964
ERC2	174.158	-1.07e-06	0.00144269	0.030013	0.39159
ZNF691	237.964	-8.13e-06	0.00144269	0.0300616	0.39159
CMYA5	34.4334	2.61e-06	0.00144269	0.0301159	0.39159
PYROXD2	68.1859	1.35e-06	0.00144269	0.0301238	0.39159
CSF1	716.656	2.37e-06	0.00144269	0.0301713	0.39159
MRPL34	788.057	7.89e-06	0.00144267	0.0301746	0.39159
DESI2	3593.2	4.53e-06	0.00144269	0.030175	0.39159
DMBT1	35.4495	-4.48e-07	0.00144269	0.0301935	0.39159
PARP11	264.399	1.37e-05	0.00144271	0.0301993	0.39159
ZC3H11B	4.76963	-4.06468	0.91034	0.0302556	0.392011
LOXHD1	1.65567	-1.41e-06	0.00144269	0.0303129	0.392067
UNC13A	19.0266	-1.25e-06	0.00144269	0.0303148	0.392067
KBTBD11	6.78122	-1.51e-06	0.00144269	0.0303316	0.392067
ATF4P3	29.655	2.89e-06	0.00144269	0.0303681	0.392231
CDK18	93.5655	-1.12e-06	0.00144269	0.0304455	0.392922
NEK6	189.157	2.31e-06	0.00144269	0.0304856	0.39302
PRMT8	2.47981	-1.04e-06	0.00144269	0.0305028	0.39302
TNFAIP3	3580.73	-3.77e-05	0.00144294	0.0305249	0.39302
PRR7-AS1	26.5589	3.94e-06	0.00144269	0.0305741	0.393346
FNDC3A	2729.33	5.4e-06	0.00144269	0.0306197	0.393484
UBE2E2	12.3214	8.26e-08	0.00144269	0.0306328	0.393484
TTC28-AS1	318.869	1.09e-05	0.00144268	0.0307322	0.394453
TBXAS1	138.013	-1.11e-06	0.00144269	0.0307756	0.394702
UPP2	2.45993	-9.76e-07	0.00144269	0.0308299	0.395043
ARMC4	7.09607	-7.72e-07	0.00144269	0.0308504	0.395043
GUCY1A2	8.97928	-5.39e-07	0.00144269	0.0309523	0.39533
SPATA6	3.6504	-5.03e-07	0.00144269	0.0309739	0.39533
DSC3	17.3903	-1.43e-06	0.00144269	0.0310114	0.39533
RLN1	2.20418	1.35e-06	0.00144269	0.0310201	0.39533
SLC44A1	3883.98	2.6e-06	0.00144269	0.0310246	0.39533
ATPIF1	2275.45	1.34e-05	0.00144269	0.0310537	0.39533
TMTC3	764.38	-1.44e-05	0.00144267	0.0310977	0.39533
PHF21B	12.1511	-4.83e-07	0.00144269	0.031128	0.39533
PTPRT	2.53777	-5.8e-07	0.00144269	0.0311297	0.39533
HLA-DRB1	7924.33	-1.03e-06	0.00144269	0.0311443	0.39533
LYRM1	1739.53	-3.76e-06	0.00144269	0.031159	0.39533
ZNF780B	449.351	3.14e-06	0.00144269	0.0311725	0.39533
CCDC57	610.499	7.9e-06	0.00144268	0.0311856	0.39533
PTPN6	664.752	1.66e-06	0.00144269	0.0312423	0.395744
KCNH8	36.3406	-1.53e-06	0.00144269	0.0313042	0.396222
LEPROT	1197.27	-4.59e-06	0.00144269	0.0313648	0.396269
DNAH10	50.7648	3.8e-06	0.00144269	0.0313688	0.396269
HCG24	1.58938	-9.01e-07	0.00144269	0.0314125	0.396269
NOX4	5.88986	-1.09e-06	0.00144269	0.0314184	0.396269
CDYL2	1383.23	-2.2e-06	0.00144269	0.0314284	0.396269
ARHGAP9	1039.12	2.87e-06	0.00144269	0.0315282	0.396846
EIF4BP3	23.635	-3.9e-06	0.00144269	0.0315469	0.396846
LINC00474	2.33562	-6.79e-07	0.00144269	0.0315704	0.396846
CD80	2031.31	-5.09e-08	0.00144269	0.0315708	0.396846
IRF8	434.024	2.3e-06	0.0014427	0.0316198	0.397158
LAPTM4A	530.165	-6.46e-06	0.00144269	0.0316867	0.397206
ELOVL2	2.24442	-1.07e-06	0.00144269	0.0317376	0.397206
SPDYE3	374.151	3.56e-06	0.00144269	0.0317428	0.397206
UPB1	76.9559	-1.25e-06	0.00144269	0.0317567	0.397206
DNASE2	544.762	5.83e-06	0.00144269	0.0317577	0.397206
CEP72	293.543	1.36e-06	0.00144269	0.031805	0.397206
NANOS2	4.4659	1.28e-06	0.00144269	0.0318083	0.397206
GPR151	15.5239	6.43e-06	0.00144269	0.0318171	0.397206
ATP6V1C1	2562.34	5.27e-06	0.00144269	0.0318608	0.397449
MRPL55	598.962	1.39e-05	0.0014427	0.0319542	0.398093
MMGT1	1412.97	-1.09e-05	0.0014427	0.0319608	0.398093
VEGFB	302.617	4.75e-06	0.00144269	0.0319921	0.398181
SLFN12L	1675.53	-9.5e-06	0.0014427	0.0321243	0.399523
FAM82B	1778.02	-4.57e-06	0.00144269	0.0321963	0.400115
OR2T3	22.2056	-7.05e-07	0.00144269	0.0322284	0.400212
HLA-DQB1	3638.7	-1.58e-06	0.00144269	0.0322803	0.400399
TMBIM6	15821.4	2.9e-05	0.00144283	0.0322922	0.400399
THOC7	2328.7	-2.34e-05	0.00144275	0.0324879	0.402237
GALNT2	2163.14	-3.22e-06	0.00144269	0.0324894	0.402237
ADAL	620.522	1.5e-05	0.00144272	0.0325612	0.402822
KRT222	61.0379	6.3e-06	0.00144269	0.0326263	0.403132
NHLRC4	8.69815	1.92e-06	0.00144269	0.0326445	0.403132
OTOA	29.0158	-7.96e-07	0.00144269	0.0326598	0.403132
QRSL1	618.638	5.47e-06	0.00144268	0.0326913	0.403218
LINC00665	2.02699	-1.16e-06	0.00144269	0.0327571	0.403421
OR2T11	5.22806	-8.43e-07	0.00144269	0.0327606	0.403421
NAA50	4963.64	1.13e-06	0.00144268	0.0327966	0.403421
EPB41	5119.67	6.35e-06	0.0014427	0.0328061	0.403421
C12orf5	619.088	-3.9e-06	0.00144269	0.0328405	0.403543
SLK	4948.91	-5.44e-06	0.00144266	0.0329279	0.404314
SLC4A4	212.699	-5.91e-07	0.00144269	0.0329853	0.404716
USO1	3911.69	-2.22e-05	0.00144276	0.0330327	0.404995
TMEM178B	792.541	-1.07e-06	0.00144269	0.033207	0.406492
DPEP2	8.52874	1.39e-06	0.00144269	0.0332112	0.406492
ZNF662	15.6643	-5.18e-07	0.00144269	0.033229	0.406492
IL21R	2333.11	-2.39e-06	0.00144269	0.033292	0.406959
YAP1P1	2.61621	-8.88e-07	0.00144269	0.0333545	0.40742
ASTL	8.55144	1.48e-06	0.00144269	0.0335029	0.408449
C2orf50	2.85461	1.71e-06	0.00144269	0.0335293	0.408449
PHYHIPL	1.79482	-8.62e-07	0.00144269	0.0335295	0.408449
LTB	2269.9	9.87e-06	0.00144271	0.0335381	0.408449
FBXO44	42.7089	1.32e-06	0.00144269	0.0335881	0.408662
DKFZP779J2370	9.65914	2.82e-06	0.00144269	0.0336053	0.408662
EPHA5	24.0106	-2.74e-07	0.00144269	0.0337698	0.410276
ELAVL4	11.3023	-2.52e-07	0.00144269	0.033788	0.410276
FGGY	240.753	-1.96e-06	0.00144269	0.0338139	0.410287
CD5L	52.3479	-8.3e-07	0.00144269	0.0339022	0.41102
CXCL3	3.29734	-5.15e-07	0.00144269	0.0339244	0.41102
DNAH9	3.73428	-5.17921	1.1929	0.0339643	0.411201
FSIP2	67.9253	-1.3e-06	0.00144269	0.0340185	0.411554
KCNIP4	48.4674	-6.03e-06	0.00144269	0.0340781	0.411966
UBAC2-AS1	57.1136	5.98e-06	0.00144269	0.0341233	0.411966
RSPH10B2	2.1446	1.91e-06	0.00144269	0.0341399	0.411966
MYLK2	19.0838	4.57e-06	0.00144269	0.0342011	0.411966
CCM2	1155.22	-1.13e-06	0.00144269	0.0342071	0.411966
IRF1	3134.77	5.73e-06	0.00144269	0.0342081	0.411966
DMD-AS2	1.75043	-8.6e-07	0.00144269	0.0342514	0.411966
OBSCN	276.505	1.7e-06	0.00144269	0.0342783	0.411966
DRAM1	963.176	-9.1e-06	0.00144271	0.0342855	0.411966
ZNF426	118.301	1.69e-06	0.00144269	0.0343033	0.411966
POU1F1	6.86356	-8.94e-07	0.00144269	0.0344859	0.413408
CBWD3	114.015	-3.85e-06	0.00144269	0.0344981	0.413408
PDP2	546.271	7.83e-06	0.00144269	0.0344989	0.413408
TTC6	1.83948	-7.84e-07	0.00144269	0.0345345	0.413485
EEF1A1P32	27.3086	-6.79e-06	0.00144269	0.0345556	0.413485
ZNF91	826.388	9.63e-07	0.00144269	0.0346716	0.414297
PRSS27	73.6762	-3.12e-06	0.00144269	0.034674	0.414297
CTIF	177.838	1.99e-06	0.00144269	0.0347289	0.414653
TRMU	634.776	1.65e-05	0.0014427	0.0347552	0.414664
KIAA1109	4798.68	-4.82e-06	0.00144269	0.0347963	0.414854
PDGFC	19.1529	-3.09e-07	0.00144269	0.0348773	0.415459
UBA6	3281.6	7.2e-06	0.00144269	0.0348977	0.415459
C17orf80	1221.2	1.03e-06	0.00144265	0.0349353	0.415581
RAET1E	4.60242	1.79e-06	0.00144269	0.0350008	0.415581
IL1R2	26.5412	-6.11931	1.42913	0.0350228	0.415581
ZBTB46	52.5074	2.57e-06	0.00144269	0.0350307	0.415581
PTPDC1	915.163	-1.15e-06	0.00144269	0.0350661	0.415581
GLUD1	5136.47	-2.29e-05	0.00144275	0.035079	0.415581
GABRA5	17.2056	-2.57e-07	0.00144269	0.0351295	0.415581
PLXNA4	15.9255	-7.43e-07	0.00144269	0.0351716	0.415581
PLXNA2	5.50496	-1.22e-06	0.00144269	0.0351828	0.415581
CDK5R1	174.791	3.71e-06	0.00144269	0.0351859	0.415581
TRGV7	4.55552	2.73e-06	0.00144269	0.0352042	0.415581
LCE1B	5.59699	-7.08e-07	0.00144269	0.0352114	0.415581
ZNF286B	45.9747	3.41e-06	0.00144269	0.0352792	0.416082
FAIM3	211.124	8.96e-07	0.00144269	0.0353149	0.416204
EEF1DP2	15.3167	-2.54e-06	0.00144269	0.0353701	0.416555
MLK7-AS1	74.1598	-1.46e-06	0.00144269	0.0354477	0.416672
RDX	3789.57	-2.3e-05	0.00144278	0.0355341	0.416672
FLJ27352	22.4489	3.37e-06	0.00144269	0.0355605	0.416672
KIF13B	1745.83	-2.11e-05	0.00144276	0.0355642	0.416672
AGK	2611.39	-4.95e-06	0.00144269	0.0355792	0.416672
ZEB1	2956.37	-6.56e-06	0.00144269	0.0355799	0.416672
IFNAR2	470.476	5.01e-09	0.00144269	0.0355926	0.416672
SDCCAG8	835.29	-9.13e-07	0.00144269	0.0356203	0.416672
RGS3	493.738	4.86e-06	0.00144269	0.0356238	0.416672
FAM90A27P	4.14623	-4.35e-07	0.00144269	0.0356335	0.416672
THOC1	1421	2.09e-07	0.00144268	0.035722	0.417409
LMTK2	2221.63	4.11e-06	0.00144269	0.0357883	0.417702
COPA	7833.02	-7.52e-05	0.00144366	0.0358159	0.417702
PLD1	27.7009	-1.39e-06	0.00144269	0.0358628	0.417702
AXL	21.3857	-3.04e-06	0.00144269	0.0358701	0.417702
PP12708	50.9201	-4.6e-06	0.00144269	0.0358851	0.417702
PLAU	211.028	1.09e-06	0.00144269	0.0359042	0.417702
OLFML1	2.08465	-1.04e-06	0.00144269	0.0359251	0.417702
MAP4K1	3426.6	1.36e-05	0.00144272	0.0359832	0.418082
LINC00349	10.68	-2.6e-07	0.00144269	0.0360521	0.418296
DGKZ	2909.82	2.1e-06	0.00144269	0.0360535	0.418296
P2RY8	779.401	1.57e-06	0.00144269	0.0360835	0.418296
KRT8P11	1.92618	-7.38e-07	0.00144269	0.0361035	0.418296
RPL9	18797.3	6.59e-05	0.00144342	0.0362056	0.419184
OR2G6	21.6977	-7.9e-07	0.00144269	0.0362924	0.419642
CCHCR1	944.777	6.54e-05	0.00144342	0.0363076	0.419642
WASL	967.14	-8.08e-07	0.00144269	0.0363218	0.419642
FKBPL	145.325	-5.22e-06	0.00144269	0.0363907	0.419982
HSD17B7	810.967	-2.8e-06	0.00144269	0.0364024	0.419982
OAS2	3045.37	3.02e-06	0.00144269	0.0364706	0.420474
CTSH	41.0243	2.77e-06	0.00144269	0.0365548	0.421092
PARP3	452.466	-3.26e-06	0.00144269	0.0365755	0.421092
TBX3	17.7966	4.98e-07	0.00144269	0.036621	0.421114
INTS12	558.415	-9.49e-06	0.00144269	0.0366287	0.421114
IPO8P1	1.13829	-1.11e-06	0.00144269	0.0366649	NA
COMMD8	746.012	-1.06e-05	0.00144268	0.0366718	0.421315
MAP7D1	2540.52	7.66e-06	0.00144269	0.0368721	0.423321
PPFIA4	16.9713	-1.78e-06	0.00144269	0.0369402	0.423806
PDILT	3.27426	-4.97e-07	0.00144269	0.0369794	0.423959
LINC00158	62.3005	-5.74e-07	0.00144269	0.0370997	0.425042
RBM38	2052.51	3.84e-06	0.00144269	0.0371898	0.425759
PKD1P1	68.922	-2.06e-06	0.00144269	0.0372404	0.425759
PLEKHA8P1	54.7328	-7.84e-06	0.0014427	0.0372683	0.425759
KIAA1522	38.0433	3.85e-06	0.00144269	0.03731	0.425759
RAPGEF2	1241.65	-2.73e-06	0.00144269	0.0373177	0.425759
GNMT	7.12687	3.15e-06	0.00144269	0.0373178	0.425759
AEN	2240.26	-3.16e-06	0.00144269	0.0373739	0.426104
DDTL	65.385	7.93e-06	0.00144267	0.0374095	0.426214
SPSB1	239.412	-6.7e-07	0.00144269	0.037454	0.426268
GNAT2	9.23547	-4.62e-06	0.00144269	0.0374683	0.426268
ACSS3	3.12545	-7.21e-07	0.00144269	0.0375046	0.426268
GNA15	11.6068	2.35e-06	0.00144269	0.037518	0.426268
SUN3	1.88563	2.04e-06	0.00144269	0.0375482	0.426316
SRSF8	880.669	-2.26e-05	0.00144277	0.0376194	0.42683
SCRN3	289.439	3.37e-06	0.00144269	0.0376957	0.4274
MMP2	1.50648	-7.73e-07	0.00144269	0.0378893	0.429298
MYLK-AS1	17.313	3.35e-06	0.00144269	0.037964	0.429848
RUNDC3B	220.326	-1.59e-06	0.00144269	0.0381689	0.431871
MYEOV2	568.219	1.72e-06	0.00144265	0.0382442	0.432426
ASGR1	5.47998	1.61e-06	0.00144269	0.0382776	0.432505
CTDP1	705.867	7.31e-06	0.00144269	0.0383125	0.432602
SEC24D	1090.03	-6.84e-06	0.00144269	0.0384338	0.433592
NEURL1B	17.1626	-1.35e-06	0.00144269	0.0384629	0.433592
POLR3D	1133.19	-6.11e-06	0.00144269	0.0384855	0.433592
LSAMP-AS1	4.68664	-5.26e-07	0.00144269	0.0385057	0.433592
IL17RA	1608.73	1.09e-05	0.00144271	0.0386297	0.43469
FAM115A	379.24	-1.08e-06	0.00144269	0.0386784	0.43494
C7orf73	862.573	-1.15e-05	0.0014427	0.0388787	0.436878
UTP18	1801.7	9.54e-06	0.00144268	0.0389365	0.436878
IL1RAPL2	9.62937	-4.59e-07	0.00144269	0.0389417	0.436878
ZNF498	1299.48	1e-05	0.00144271	0.0389832	0.436878
ALOX15B	9.11256	-8.54e-07	0.00144269	0.0389837	0.436878
GABRA3	8.7105	-2.77e-07	0.00144269	0.0391844	0.438479
TMEM223	425.126	7.38e-06	0.00144269	0.039222	0.438479
TC2N	1309.54	1.44e-06	0.00144269	0.0392323	0.438479
NFASC	8.48113	-1.39e-06	0.00144269	0.0392333	0.438479
ACP5	8.69192	5.04e-06	0.00144269	0.0392825	0.43873
SPTY2D1-AS1	12.9045	4.33e-06	0.00144269	0.0393518	0.439116
C4B	6.22352	-1.13e-06	0.00144269	0.0393705	0.439116
IL26	311.246	-4.75e-07	0.00144269	0.0394589	0.439803
OGFR	1433.63	3.09e-05	0.00144284	0.0397126	0.442081
REPIN1	1686.32	-7.22e-06	0.00144269	0.0397171	0.442081
OLFM4	13.3037	1.19e-06	0.00144269	0.0397818	0.442237
NTMT1	495.332	5.8e-06	0.00144269	0.0397849	0.442237
SPANXN1	2.35044	-6.04e-07	0.00144269	0.0398413	0.442565
ENSA	5902.43	1.38e-05	0.00144271	0.0398833	0.442697
CTBS	928.836	-1.28e-05	0.00144272	0.0399071	0.442697
SYCE2	353.147	-5.68e-07	0.00144269	0.039975	0.442892
POMT1	548.885	1.36e-05	0.00144272	0.0399786	0.442892
HOXC5	16.9886	1.26e-06	0.00144269	0.0400874	0.443798
HEMGN	2.94288	1.57e-06	0.00144269	0.0402494	0.445291
SHC4	417.105	-1.27e-06	0.00144269	0.0405047	0.447601
S100A1	27.7909	-4.35e-06	0.00144269	0.0405127	0.447601
PCDHGB7	5.84649	2.25e-06	0.00144269	0.0406068	0.44834
ZNF222	4.00274	6.02e-07	0.00144269	0.0406564	0.448585
SLC9A2	1.67918	1.5e-06	0.00144269	0.0408132	0.450013
ZNF385D	2.50073	-5.02e-07	0.00144269	0.0408759	0.450158
ARHGAP25	1404.61	2.7e-06	0.00144269	0.0409037	0.450158
GAS2L1	2.74938	1.03e-06	0.00144269	0.0409287	0.450158
MYCN	9.87691	-4.35e-07	0.00144269	0.0409434	0.450158
BID	407.473	1.69e-06	0.00144269	0.0409634	0.450158
SOCS2	1150.03	3.16e-06	0.00144269	0.0410487	0.450795
BATF3	3006.11	-1.55e-06	0.00144269	0.0410954	0.450874
KIAA1024L	42.8282	-3.81e-07	0.00144269	0.0411108	0.450874
PEX16	420.267	8.9e-06	0.00144268	0.0412319	0.4519
TH1L	2217.44	1.59e-06	0.00144269	0.0412833	0.452162
TCEB1	1408.2	5.35e-06	0.00144269	0.0413298	0.452271
TP53BP1	2862.14	-1.39e-05	0.00144271	0.0413483	0.452271
POT1	1422.54	-5.6e-06	0.00144269	0.0413901	0.452377
MTBP	1010	5.02e-06	0.00144269	0.041413	0.452377
TRNP1	2.16806	8.13e-07	0.00144269	0.0414585	0.452385
CX3CR1	112.705	1.4e-06	0.00144269	0.0414689	0.452385
EVA1C	5.48298	4.68e-07	0.00144269	0.0416229	0.453764
ECHS1	1593.44	-8.19e-06	0.00144268	0.041679	0.454008
GIPC2	1.99176	1.67e-06	0.00144269	0.0417782	0.454008
COX6C	2915.74	4.4e-06	0.00144269	0.0417861	0.454008
ZFP91-CNTF	120.309	5.83e-06	0.00144269	0.0417993	0.454008
WDR86	11.3321	-2.71e-06	0.00144269	0.0418045	0.454008
AKAP5	88.4481	3.03e-06	0.00144269	0.0418111	0.454008
PLA1A	41.1351	-4.93e-07	0.00144269	0.041967	0.455117
CUL4B	2021.83	-3.6e-06	0.00144269	0.0419686	0.455117
HERC2P4	45.5419	-7.05e-07	0.00144269	0.0420008	0.455139
KLLN	161.452	-4.7e-06	0.00144269	0.042026	0.455139
INTS7	1641.27	-6.52e-06	0.00144269	0.0421946	0.456366
FILIP1L	102.602	-4.93e-06	0.00144269	0.0421949	0.456366
APOM	83.3972	4.69e-06	0.00144269	0.0422741	0.456921
IGSF1	1.26155	-1.53e-06	0.00144269	0.0422905	NA
TIMM13	769.941	6.97e-06	0.00144269	0.0423354	0.457283
ENAH	62.0824	-1.06e-06	0.00144269	0.0423811	0.457415
NME3	56.8844	2.75e-06	0.00144269	0.0424033	0.457415
SNX18P16	39.3529	-8.48e-07	0.00144269	0.0425897	0.45878
NACA	15356.4	-3.27e-05	0.00144283	0.042595	0.45878
F11R	557.922	2.07e-06	0.00144269	0.0426448	0.45878
PCDH7	13.5525	-3.41e-07	0.00144269	0.0426605	0.45878
GNPAT	2196.83	-9.68e-06	0.00144268	0.0426694	0.45878
RASGEF1B	43.0274	-1e-06	0.00144269	0.0427725	0.459208
ZNF484	611.922	-1.18e-05	0.0014427	0.0427799	0.459208
MED4	1229.76	8.21e-06	0.00144268	0.0428054	0.459208
HLA-DQA1	14424.4	-1e-06	0.00144269	0.042821	0.459208
GIPR	85.4392	2.23e-06	0.00144269	0.0428506	0.459225
IZUMO4	18.3867	3.27e-06	0.00144269	0.0430424	0.460668
RGPD4	1.79709	-2.3e-06	0.0014427	0.0430723	0.460668
HIST1H3A	856.607	4.09e-06	0.00144269	0.0430766	0.460668
TAX1BP1	5288.53	1.79e-05	0.00144275	0.0430974	0.460668
ADIPOR1	3779.6	-7.6e-06	0.00144268	0.0432748	0.462138
CYCSP52	7.41295	-3.66e-06	0.00144269	0.0432956	0.462138
CSF2RA	4.9478	-6.5e-07	0.00144269	0.0434104	0.462138
SLIT2	2.45037	-2.01e-06	0.0014427	0.0434427	0.462138
SUPV3L1	1800.04	6.6e-06	0.00144269	0.0434746	0.462138
NELF	1321.1	9.08e-07	0.00144269	0.0434912	0.462138
NCOA2	4475.81	-2.58e-06	0.00144269	0.0434926	0.462138
GABPA	2458.75	-3.02e-06	0.00144269	0.0434979	0.462138
BAG3	150.43	2.17e-06	0.00144269	0.0435238	0.462138
GPR3	88.0723	2.59e-06	0.00144269	0.0435282	0.462138
LMOD2	16.8465	-1.2e-06	0.00144269	0.0435479	0.462138
FAM184A	8.11023	-1.09e-06	0.00144269	0.0435725	0.462138
PHC3	2201.2	-9.68e-06	0.00144268	0.0436224	0.462369
CORT	6.01501	3.58e-06	0.00144269	0.0438234	0.4642
ANO6	2658.66	3.15e-05	0.00144286	0.0438752	0.46445
EPHA4	70.6458	-7.23e-07	0.00144269	0.0439324	0.464755
ARHGEF28	3.52284	-9.84e-07	0.00144269	0.0440221	0.465405
POLR2J3	384.986	4.12e-06	0.00144269	0.0440606	0.465512
TRMT10B	236.8	5.63e-06	0.00144269	0.0441816	0.466491
DSE	84.7524	2.27e-06	0.00144269	0.0442155	0.466548
COX20P2	132.435	-2.16e-06	0.00144269	0.0443039	0.467182
NDUFAF2	597.28	5.73e-06	0.00144269	0.044385	0.467736
ATG3P1	1.61236	-2.68e-07	0.00144269	0.0444147	0.467749
CD36	2.76011	-7.02e-07	0.00144269	0.0444879	0.467954
CLNK	379.712	-5.34e-07	0.00144269	0.0445006	0.467954
TMEM55B	505.649	-8.15e-06	0.00144268	0.0445195	0.467954
PFKFB2	196.665	4.35e-06	0.0014427	0.0445799	0.468108
MAFK	365.383	9.78e-06	0.00144268	0.0446106	0.468108
PPM1K	855.883	-2.18e-05	0.00144277	0.0446197	0.468108
MORN4	80.2033	-1.08e-06	0.00144269	0.0447162	0.468821
LINC00052	4.08838	-5.24e-07	0.00144269	0.0447854	0.469157
PELI3	79.3385	3.47e-06	0.00144269	0.0448053	0.469157
IFNK	1.91218	-1.92e-06	0.00144269	0.0448786	0.469317
TRIB1	1693.1	-2.15e-06	0.00144269	0.0448832	0.469317
MRPL9	2479.98	-5.71e-06	0.00144269	0.0449064	0.469317
COPB2	5731.61	-0.00022675	0.00145176	0.0449447	0.469419
CSK	2040.88	5.36e-06	0.00144269	0.0449989	0.469686
SP110	2615.07	4.24e-06	0.00144269	0.0451697	0.470995
ETFDH	1002.25	1.76e-05	0.00144273	0.0451816	0.470995
CERCAM	209.075	1.53e-06	0.00144269	0.0452238	0.471136
SPATS2	753.866	-4.08e-06	0.00144269	0.0452787	0.47141
C2orf62	3.10007	1.49e-06	0.00144269	0.0453562	0.471812
CSDC2	4.78499	3.27e-06	0.00144269	0.0453749	0.471812
NTN4	2.63856	8.68e-07	0.00144269	0.0454378	0.471931
RERE	518.914	3.71e-06	0.00144269	0.0454438	0.471931
APLP1	191.458	-8.39e-07	0.00144269	0.0455542	0.472779
CPT1A	543.487	1.18e-06	0.00144269	0.0456113	0.472993
SLC22A1	4.49439	-2.09e-07	0.00144269	0.0456368	0.472993
FAM19A3	8.51344	-6.05e-07	0.00144269	0.045689	0.472993
GANC	367.406	6.2e-06	0.00144269	0.04569	0.472993
CCNI	3996.98	-1.12e-05	0.0014427	0.0457697	0.473204
EIF2D	2728.63	-2.15e-07	0.00144269	0.0457756	0.473204
HAPLN3	441.336	3.29e-07	0.00144269	0.0457968	0.473204
DOCK10	5779.92	1.17e-05	0.00144271	0.0458531	0.473486
LRCH4	1586.38	3.37e-06	0.00144269	0.0458816	0.473486
HTR2C	2.08683	-6.53e-07	0.00144269	0.0459142	0.473525
LATS2	107.527	1.3e-06	0.00144269	0.0459788	0.473822
ZNHIT2	84.6461	5.69e-06	0.00144269	0.046025	0.473822
MTUS2	25.3459	-9.1e-07	0.00144269	0.0460295	0.473822
TRIM43B	2.21891	-1.08e-06	0.00144269	0.0462221	0.475432
STMN2	55.2274	-5e-07	0.00144269	0.0462529	0.475432
C3	360.203	2.02e-06	0.00144269	0.0462728	0.475432
INTS3	2137.38	-7.01e-06	0.00144269	0.0463757	0.475755
TRIM16L	45.395	1.59e-06	0.00144269	0.0463904	0.475755
USP8	2929.19	3.22e-06	0.00144268	0.0464171	0.475755
MUC17	2.17075	1.82e-06	0.00144269	0.04642	0.475755
AMMECR1LP1	8.49689	-3.39e-07	0.00144269	0.046461	0.475878
VIT	24.3599	-3.48e-07	0.00144269	0.0465094	0.476077
NAGS	37.2937	3.83e-06	0.00144269	0.046546	0.476155
CTNND1	382.333	-2.06e-06	0.00144269	0.0466083	0.476408
CD160	1488.54	-2.07e-06	0.0014427	0.0466287	0.476408
DLGAP2	15.7055	-3.15e-07	0.00144269	0.0467584	0.477436
OR4F15	3.54249	-5.52e-07	0.00144269	0.0467898	0.477459
LINC00310	10.3829	2.97e-06	0.00144269	0.0468329	0.477603
GLRA3	20.3935	-1.79e-06	0.00144269	0.0468765	0.47775
MAST4-AS1	11.7859	-1.68e-06	0.00144269	0.0469397	0.477968
UBQLN2	977.641	6.11e-06	0.00144269	0.0469618	0.477968
FLG	11.2155	-1.05e-06	0.00144269	0.0469852	0.477968
ITGA6	1255.82	1.82e-06	0.00144269	0.0470267	0.478095
ZNF274	483.089	4.55e-06	0.00144269	0.0470593	0.478131
IER5L	50.8954	1.39e-06	0.00144269	0.047117	0.478412
TEFM	417.211	1.55e-05	0.00144272	0.0471452	0.478412
SCARF1	39.2401	-1.94e-06	0.00144269	0.0472199	0.478873
TP53INP1	282.642	-1.94e-06	0.00144269	0.0472517	0.478901
CACNG8	4.36852	-1.73e-06	0.00144269	0.047371	0.479814
OR8B8	6.62085	-2.92e-07	0.00144269	0.0474236	0.480002
RB1	4631.47	4.45e-06	0.00144269	0.0474849	0.480002
RNF167	1472.64	1.21e-05	0.00144271	0.0474963	0.480002
CITED2	1824.05	-2.06e-06	0.00144269	0.0475242	0.480002
TIGD2	331.495	-5.02e-06	0.00144269	0.0475357	0.480002
TEX2	1363.53	2.12e-05	0.00144275	0.0476059	0.480179
PRKD2	619.499	2.35e-06	0.00144268	0.0476145	0.480179
TPK1	149.666	-3.72e-06	0.00144269	0.0476409	0.480179
AKR1B15	10.3554	-5.7e-07	0.00144269	0.0477564	0.480887
LSM12P1	12.4054	6.09e-06	0.00144269	0.0477697	0.480887
NPM1P10	0.967193	-1.12e-06	0.00144269	0.0477719	NA
CAPN6	6.41898	-1.1e-06	0.00144269	0.0478299	0.481123
OBSL1	5.08908	-9.38e-07	0.00144269	0.0478517	0.481123
HNRNPA1P22	7.57335	-3.51e-07	0.00144269	0.0478989	0.481304
KLHL38	3.34226	-4.33e-07	0.00144269	0.0479625	0.481648
C17orf67	105.423	-1.4e-05	0.0014427	0.0481385	0.48312
PSMA6	3379.1	8.13e-06	0.00144268	0.0481967	0.483409
MIR1255B1	102.278	-4.99e-07	0.00144269	0.0483893	0.484791
SVOPL	3.08621	1.72e-06	0.00144269	0.0483962	0.484791
GULP1	115.48	-2.44e-07	0.00144269	0.0484231	0.484791
IMPDH1P6	5.12852	2.43e-06	0.00144269	0.0484543	0.484808
NR4A3	687.867	-9.93e-07	0.00144269	0.0485144	0.485114
DNAJC13	2729.84	-4.9e-06	0.00144267	0.0485454	0.485129
PPFIBP2	75.0028	-9.22e-07	0.00144269	0.0486429	0.485625
COX10-AS1	225.01	9.84e-06	0.0014427	0.048678	0.485625
ATP8A2P1	6.81277	-2.84e-07	0.00144269	0.0486837	0.485625
HCST	612.74	2.02e-06	0.00144269	0.0487589	0.48608
DPM1	1586.53	7.11e-05	0.00144355	0.0488192	0.486386
CYP3A7	3.79292	2.7e-06	0.00144269	0.04889	0.486793
C9orf40	545.2	4.81e-06	0.00144269	0.0489193	0.486793
CFLAR	6770.53	-3.31e-06	0.00144269	0.0490323	0.487622
MAP2K6	112.016	2.5e-06	0.00144269	0.0491962	0.487846
SORL1	377.999	1.73e-06	0.00144269	0.0492065	0.487846
OR9A2	1.83586	-9.86e-07	0.00144269	0.0492166	0.487846
ZNF623	941.992	5.04e-06	0.00144269	0.0492277	0.487846
MOCS3	304.258	8.51e-06	0.00144268	0.0492281	0.487846
GRIK4	11.3932	-9.5e-07	0.00144269	0.049292	0.487846
CD163L1	8.20895	1.06e-06	0.00144269	0.0492934	0.487846
ZNF821	196.82	-5.12e-06	0.00144269	0.0493217	0.487846
SLC25A25	473.179	6.24e-06	0.00144269	0.0493221	0.487846
TTC3	6362.02	-4.71e-06	0.00144269	0.049371	0.488037
BBC3	373.261	-3.5e-06	0.00144269	0.049544	0.489083
RNF103	678.11	-5.92e-06	0.00144269	0.0495485	0.489083
UQCRH	3188.87	9.52e-06	0.00144267	0.0495662	0.489083
OXTR	21.7936	2.7e-06	0.00144269	0.0496066	0.489172
NDUFAF3	1020.99	-6.28e-06	0.00144269	0.0496779	0.489172
HEPHL1	6.04958	2.79e-06	0.00144269	0.049683	0.489172
CDKN2A	1314.92	3.44e-06	0.00144269	0.0496943	0.489172
ANGPT1	31.2711	1.33e-06	0.00144269	0.0497576	0.489502
TNK1	10.7832	1.97e-06	0.00144269	0.0498424	0.490042
FAM185A	158.173	3.35e-06	0.00144269	0.049896	0.490047
TMEM102	120.457	4.24e-06	0.00144269	0.0499025	0.490047
NAAA	368.077	9.09e-06	0.0014427	0.0499785	0.490244
DMP1	10.3664	-7.63e-07	0.00144269	0.0499822	0.490244
SIN3B	947.109	-2.53e-06	0.00144267	0.0500298	0.490417
TATDN3	569.073	-7.39e-06	0.00144268	0.0500788	0.490507
HAUS6P2	7.90234	-2.59e-07	0.00144269	0.0501186	0.490507
GAP43	19.6537	-5.29e-07	0.00144269	0.050146	0.490507
NCOA7	1822.44	6.13e-06	0.0014427	0.0501678	0.490507
ANKRD36C	2117.02	5.6e-06	0.00144269	0.0501882	0.490507
USP32P1	69.1734	8.36e-07	0.00144269	0.050271	0.490543
DUSP13	2.80786	-1.07e-06	0.00144269	0.0503139	0.490543
SMN2	312.572	6.49e-06	0.00144269	0.0503333	0.490543
RNF157-AS1	18.4976	2.37e-06	0.00144269	0.0503349	0.490543
LINC00528	127.213	2.79e-06	0.00144269	0.0503412	0.490543
BLOC1S4	248.975	2.95e-06	0.00144268	0.0504035	0.490737
TMEM229B	421.686	1.73e-06	0.00144269	0.0504263	0.490737
WFDC1	6.40296	-3.76e-07	0.00144269	0.0504507	0.490737
RIMBP2	23.7652	1.05e-06	0.00144269	0.050544	0.4912
FAM9C	2.32615	1.76e-06	0.00144269	0.0505581	0.4912
MFSD2A	81.2742	1.07e-06	0.00144269	0.0506208	0.491281
GPR84	90.5172	9.31e-07	0.00144269	0.0506263	0.491281
ACVR1C	74.2479	-1.48e-06	0.00144269	0.0506935	0.491596
RFPL1	4.61341	-6.76e-07	0.00144269	0.0507399	0.491596
GLA	574.636	-3.05e-06	0.00144269	0.0507484	0.491596
PCDH10	102.983	3.4e-07	0.00144269	0.0509173	0.49294
SCAMP3	1886.72	-6.4e-06	0.00144269	0.0509472	0.49294
CLDN23	1.85652	7.22e-07	0.00144269	0.0510963	0.494092
TBKBP1	103.938	-1.66e-07	0.00144269	0.0512348	0.495039
CUL7	716.464	7.93e-06	0.0014427	0.0512546	0.495039
FABP3	5.53177	3.16e-06	0.00144269	0.0512984	0.495171
SNRPGP4	2.59098	1.48e-06	0.00144269	0.0513878	0.495542
KIF3A	2687.64	-3.34e-06	0.00144269	0.0514079	0.495542
STX3	3889.93	2.3e-06	0.00144269	0.0514273	0.495542
CD6	82.0896	7.58e-07	0.00144269	0.0514992	0.495944
MBL2	1.49938	-8.55e-07	0.00144269	0.0516187	0.496803
RPL21P44	3.51525	-2.7e-06	0.00144269	0.0516717	0.497023
VASH1	115.808	1.96e-06	0.00144269	0.0517255	0.497113
SLMO1	4.50808	1.22e-07	0.00144269	0.0517632	0.497113
SEC22B	1830.77	-5.3e-06	0.00144269	0.0517719	0.497113
GPR37	3.25889	-5.89e-07	0.00144269	0.0518771	0.497832
ATL1	6.85052	3.54e-06	0.00144269	0.0519211	0.497964
DYX1C1	3.4915	-1.1e-06	0.00144269	0.0521422	0.499723
PVRL1	163.381	-9.63e-07	0.00144269	0.0521654	0.499723
HOXD13	1.35315	1.2e-06	0.00144269	0.0521743	NA
VPS28	711.829	9.17e-08	0.00144269	0.0523072	0.500549
MYRIP	7.46782	-1.57e-06	0.00144269	0.0523345	0.500549
CCDC6	2478.29	-5.62e-06	0.0014427	0.052343	0.500549
ITIH4	40.5064	3.55e-06	0.00144269	0.0523875	0.500684
PPP2R2C	47.7727	-7.19e-07	0.00144269	0.0524788	0.501187
MYO5C	81.3292	2.04e-06	0.00144269	0.0525012	0.501187
EXOC8	1712.4	5.65e-06	0.00144269	0.0525855	0.5017
TENM1	492.573	-1.21e-06	0.00144269	0.0526636	0.502153
GNB1L	135.995	7.15e-06	0.00144268	0.0527058	0.502264
MYB-AS1	14.1536	-1.54e-06	0.00144269	0.0528562	0.503205
ATP6V1F	1979.99	-1.18e-05	0.0014427	0.0528657	0.503205
YPEL5	1988.08	-1.84e-06	0.00144269	0.0529312	0.503536
ST13P20	2.24512	-7.2e-07	0.00144269	0.0530323	0.503897
SPN	4452.44	1.04e-05	0.0014427	0.0530463	0.503897
PTGDR	78.0193	1.02e-06	0.00144269	0.0530611	0.503897
SEPTIN9	6606.19	1.96e-06	0.00144269	0.0531358	0.504314
ABCC11	6.5619	-2.58e-06	0.00144269	0.0531698	0.504346
DRD5P2	1.11976	-1.22e-06	0.00144269	0.0532622	NA
CREB1	3284.07	-8.99e-06	0.00144269	0.0532635	0.504943
ZSCAN12P1	7.30454	2.45e-06	0.00144269	0.053352	0.505491
TBC1D29	1.66336	1.9e-06	0.00144269	0.0534709	0.506325
AQP7P1	2.67726	-4.76e-07	0.00144269	0.0535251	0.506413
LINC00515	73.6652	-1.49e-06	0.00144269	0.0536063	0.506413
SARNP	2131.73	-9.5e-06	0.00144267	0.0536076	0.506413
TMEM19	710.198	-9.08e-06	0.00144269	0.0536308	0.506413
C11orf83	362.253	1.08e-05	0.0014427	0.0536597	0.506413
PATL2	214.166	2.55e-06	0.00144269	0.0536673	0.506413
ALAS1	2169.82	1.22e-05	0.00144267	0.0536994	0.506413
ARMC9	125.019	4.41e-06	0.00144269	0.0537268	0.506413
SAMHD1	4152.65	4.38e-06	0.00144269	0.0537772	0.506597
VDR	646.993	-1.26e-06	0.00144269	0.0538096	0.506612
HMGB1P19	12.8489	4.36e-06	0.00144269	0.0538679	0.506871
EAF1-AS1	24.0258	3.04e-06	0.00144269	0.0539651	0.507409
MFI2-AS1	24.7431	5.34e-06	0.00144269	0.0539924	0.507409
AIDA	760.421	-5.37e-06	0.00144268	0.0540219	0.507409
TNNT3	12.8335	-9.98e-07	0.00144269	0.054072	0.507409
CNTN1	1.95747	-1.17e-06	0.00144269	0.0540795	0.507409
ALDH1L1	17.6095	1.53e-06	0.00144269	0.0543068	0.508954
PRKCD	335.221	3.86e-06	0.00144269	0.0543342	0.508954
CLSTN3	1419.54	-2.75e-06	0.00144269	0.0543387	0.508954
C20orf195	1.61764	1.05e-06	0.00144269	0.054385	0.508954
GSTM2	3.45157	-3.04e-06	0.00144269	0.0544281	0.508954
C19orf52	306.976	1.01e-05	0.00144268	0.0544379	0.508954
ENTPD4	2135.96	-6.43e-06	0.00144269	0.0544779	0.508954
HLTF	5084.81	-3.59e-06	0.00144269	0.0545108	0.508954
IZUMO1	15.6203	-1.18e-06	0.00144269	0.054523	0.508954
POLI	705.305	-4.04e-06	0.00144269	0.0546417	0.509772
SLC5A9	4.39219	-6.79e-07	0.00144269	0.0547703	0.510682
PDE6G	8.32354	2.96e-06	0.00144269	0.0548263	0.510702
WDR91	477.066	-4.97e-06	0.00144269	0.0548347	0.510702
PALM3	1.69581	1.57e-06	0.00144269	0.0548931	0.510811
MAGI3	340.729	-1.19e-06	0.00144269	0.0549085	0.510811
DIO2	57.2434	-5.67e-07	0.00144269	0.0550174	0.511534
HCFC2	574.763	1.31e-05	0.00144265	0.0550987	0.511952
ZNF826P	16.8034	8.51e-07	0.00144269	0.0551247	0.511952
SMARCD3	52.9565	4.49e-06	0.00144269	0.0551577	0.51197
IMMP1L	172.916	8.97e-06	0.00144268	0.0552805	0.512819
ZNF629	74.6995	-1.14e-06	0.00144269	0.0554094	0.513725
C5orf27	11.2021	-1.11e-06	0.00144269	0.0557011	0.51597
CORO1B	70.7169	2.19e-06	0.00144269	0.0557143	0.51597
CBX3P1	7.12944	-2.5e-07	0.00144269	0.0558265	0.516718
ADCY9	519.242	-1.97e-06	0.00144269	0.0559488	0.517558
RPL13AP5	189.513	-1.36e-06	0.00144268	0.0560127	0.517857
EXPH5	4.79783	-1.08e-08	0.00144269	0.0562854	0.520086
LZTR1	1195.91	-8.29e-06	0.00144268	0.0564158	0.520998
POLDIP2	3042.62	6.54e-06	0.00144268	0.0564718	0.521063
FAM154A	1.96579	-1.48e-06	0.00144269	0.0565104	0.521063
PVRIG	804.699	5.31e-07	0.00144269	0.0565181	0.521063
EPHX3	8.24087	-1.95e-06	0.00144269	0.0566447	0.521938
SVIL	505.478	1.56e-06	0.00144269	0.0566853	0.522019
ZNF469	3.86797	2.24e-06	0.00144269	0.0567243	0.522086
MAD2L2	1341.13	1.08e-05	0.00144271	0.0567626	0.522146
TEP1	989.839	-4.19e-06	0.00144269	0.0568225	0.522404
SNTB1	1294.22	5.03e-06	0.00144269	0.0568993	0.52257
GTPBP6	431.217	4.54e-06	0.00144269	0.0569338	0.52257
SPTA1	144.47	-1.22e-06	0.00144269	0.056936	0.52257
GPAA1	1042.84	-7.13e-06	0.0014427	0.0569961	0.52283
OR51B2	6.53633	-2.69e-07	0.00144269	0.0570725	0.523239
GLYATL1P2	2.38383	-5e-07	0.00144269	0.0571122	0.523311
DSTNP1	27.0236	-5.05e-06	0.00144269	0.0571623	0.523478
SH3PXD2A	211.97	-5.98e-07	0.00144269	0.0573525	0.524569
AK7	27.8043	3.37e-06	0.00144269	0.0573595	0.524569
SNX21	36.2404	6.75e-06	0.00144269	0.0573929	0.524569
FAM60CP	4.71313	-1.5e-06	0.00144269	0.0574092	0.524569
SOX2-OT	454.669	-8.7e-07	0.00144269	0.057543	0.5255
DYNLRB2	7.51125	-1.74e-06	0.00144269	0.0576441	0.525997
ARL6IP4	2444.49	9.35e-06	0.00144269	0.0576615	0.525997
PLLP	2.6046	1.34e-06	0.00144269	0.0577188	0.526084
AKAP17A	1554.7	9.63e-06	0.0014427	0.057735	0.526084
ZNF702P	1.09577	-1.12e-06	0.00144269	0.0578004	NA
NMT2	654.502	4.54e-06	0.0014427	0.0578557	0.526648
DLG2	98.7776	-2.05e-06	0.00144269	0.057861	0.526648
ZNF252P-AS1	16.8982	1.58e-06	0.00144269	0.0581167	0.528468
FCRL1	16.6574	-5.17e-07	0.00144269	0.0581253	0.528468
RAMP2-AS1	1.81228	1.17e-06	0.00144269	0.0581977	0.528833
KCNQ3	11.4555	-4.83e-07	0.00144269	0.058295	0.529159
OIP5	277.189	3.73e-06	0.00144269	0.058298	0.529159
TRPV5	1.80942	-9.13e-07	0.00144269	0.0583331	0.529185
GOLM1	914.069	4.74e-06	0.0014427	0.0584943	0.530354
RBMXL1	1834.13	-3.77e-06	0.00144269	0.0585621	0.530535
SPPL2B	437.179	-8.02e-06	0.00144268	0.0585787	0.530535
OPA1-AS1	1.72484	-1.79e-06	0.00144269	0.0586787	0.530708
C1orf141	2.10425	-7.78e-07	0.00144269	0.0587427	0.530708
PTCH1	219.305	2.39e-06	0.00144269	0.0587529	0.530708
PYCR2	2784.23	-8.89e-06	0.00144269	0.0587731	0.530708
MUC15	72.9284	-5.69e-07	0.00144269	0.0587984	0.530708
ZNF805	396.583	-3.65e-06	0.00144268	0.0588097	0.530708
CYP26A1	2.91444	1.71e-06	0.00144269	0.058824	0.530708
UBE2Q1	3848.76	5.44e-06	0.00144269	0.0588686	0.530748
EIF4E3	1433.18	2.39e-07	0.00144269	0.0588931	0.530748
CBX8	328.688	4.51e-06	0.00144269	0.0589533	0.530764
ZC3H10	289.907	-5.82e-06	0.00144269	0.0589676	0.530764
TENM4	3.1187	-8.51e-07	0.00144269	0.0589917	0.530764
ADI1	1218.17	-3.45e-06	0.00144269	0.0590582	0.531072
FAAH	23.9569	-2.74e-06	0.00144269	0.0591318	0.53143
ZNF396	3.24834	1.33e-06	0.00144269	0.0591971	0.53143
PIN4	370.8	1.12e-05	0.0014427	0.0592338	0.53143
TSC22D4	2639.49	1.67e-06	0.00144269	0.0592438	0.53143
PTGES	12.5273	1.18e-06	0.00144269	0.0592599	0.53143
LOH12CR1	277.223	-3.44e-06	0.00144269	0.0594791	0.532934
PI4KB	2618.45	-4.87e-06	0.00144269	0.0595336	0.532934
C20orf196	118.857	8.53e-06	0.00144269	0.0595429	0.532934
AGMAT	71.9841	-1.16e-06	0.00144269	0.0595573	0.532934
CPSF1	1478.61	2.01e-06	0.00144268	0.0596269	0.533076
ZHX1	2937.84	6.83e-06	0.0014427	0.059638	0.533076
MGAT5B	8.6852	1.09e-06	0.00144269	0.0596977	0.533088
MRP63	1076.1	1.49e-05	0.00144271	0.0597043	0.533088
FSTL4	7.0897	-1.03e-06	0.00144269	0.0597553	0.533184
C1orf74	257.33	-7.76e-06	0.00144268	0.0597799	0.533184
RPS27	28069.7	-4.73e-06	0.00144269	0.0598371	0.533241
ETV1	98.1217	9.77e-07	0.00144269	0.0598513	0.533241
APOBEC3H	1143.61	-2.36e-06	0.00144269	0.0599051	0.533431
TAS2R39	3.56638	-1.33e-06	0.00144269	0.0599636	0.533663
ADAMTS16	125.429	-4.54e-07	0.00144269	0.0600458	0.534106
CTGLF10P	3.92994	1.26e-06	0.00144269	0.0600866	0.534175
FSCN2	5.62206	2.85e-06	0.00144269	0.060124	0.534175
SURF2	434.816	4.07e-06	0.00144269	0.0601512	0.534175
EMBP1	20.9416	-4.52e-06	0.00144269	0.0602407	0.534624
NRG4	148.151	4.08e-06	0.00144269	0.0602668	0.534624
RAB2A	2077.38	6.39e-06	0.00144269	0.0604331	0.53527
LMNA	15872.7	-1.27e-06	0.00144269	0.0604434	0.53527
ANAPC15	572.113	1.47e-05	0.00144272	0.0604551	0.53527
TTLL9	10.6529	-3.41e-06	0.00144269	0.0604996	0.53527
LRRC4B	10.1741	-1.81e-06	0.00144269	0.0605098	0.53527
KDM4D	34.5152	2.46e-06	0.00144269	0.0605351	0.53527
PREP	878.172	2.98e-06	0.00144269	0.0608236	0.537531
KCNK9	6.57787	-7.21e-07	0.00144269	0.0608618	0.53758
SH3D21	107.989	2.76e-06	0.00144269	0.0609429	0.53765
ZNF692	795.65	-5.48e-06	0.00144269	0.0609577	0.53765
NECAB1	14.0971	-1e-06	0.00144269	0.060968	0.53765
EFNA3	108.291	-4.99e-06	0.00144269	0.0610263	0.537876
KLF13	4027.73	4.43e-06	0.00144269	0.0611118	0.53826
TMEM183A	1794.86	-9.19e-06	0.00144268	0.0611353	0.53826
ZNF654	836.793	-8.25e-06	0.00144268	0.0612458	0.538943
LCP2	4193.36	5.56e-06	0.00144269	0.0613163	0.539223
GHRHR	5.57233	1.47e-06	0.00144269	0.0613432	0.539223
COPG1	4798.03	-7.86e-06	0.00144268	0.0614689	0.539646
UBE4B	1663.8	-6.68e-06	0.00144269	0.0614925	0.539646
TMPRSS5	21.7932	-1.21e-06	0.00144269	0.0615087	0.539646
ZNF250	345.327	-5.17e-06	0.00144269	0.0615252	0.539646
ZNF674	166.7	-2.85e-06	0.00144269	0.0616458	0.539646
TBC1D2B	1992.08	8.95e-06	0.0014427	0.0616512	0.539646
TP53I3	119.756	2.73e-07	0.00144269	0.0616617	0.539646
JAK3	3683.75	-3.72e-06	0.00144269	0.0616622	0.539646
LIN7A	969.821	-7.43e-07	0.00144269	0.0617088	0.539646
UBAC2	1412.17	6.87e-06	0.00144269	0.0617199	0.539646
ITGBL1	52.2221	-5.88e-07	0.00144269	0.0617718	0.539813
BMI1	3291.11	-3.68e-06	0.00144269	0.0619853	0.540764
RBKS	121.635	2.65e-06	0.00144269	0.0620105	0.540764
OR6E1P	1.40153	1.36e-06	0.00144269	0.062031	0.540764
PLCD1	69.8098	1.76e-06	0.00144269	0.0620632	0.540764
DPRXP4	8.26278	2.4e-06	0.00144269	0.0621331	0.540764
MAL2	3.69276	-4.87e-07	0.00144269	0.0621963	0.540764
MURC	11.2747	1.62e-06	0.00144269	0.0622765	0.540764
ARHGAP30	8085.67	4.47e-06	0.00144268	0.0622918	0.540764
RBM26-AS1	86.6322	3.41e-06	0.00144269	0.0623087	0.540764
GPT	18.0725	-7.95e-06	0.0014427	0.0623109	0.540764
ZNF853	22.7893	2.06e-06	0.00144269	0.0623174	0.540764
B9D1	70.4638	-2.57e-06	0.00144269	0.0623356	0.540764
FCRL2	2.59688	-4.48e-07	0.00144269	0.062337	0.540764
CDKN2C	749.449	2.55e-06	0.00144269	0.062349	0.540764
ZNF385C	30.1511	2.26e-06	0.00144269	0.0623744	0.540764
PPARGC1B	617.508	9.44e-06	0.0014427	0.0624132	0.540816
AANAT	1.1783	1.53e-06	0.00144269	0.0624615	NA
TEN1-CDK3	30.9865	3.95e-06	0.00144269	0.0624705	0.541027
KBTBD3	133.296	-4.56e-06	0.00144269	0.0625152	0.541129
RPL34	6843.28	-7.07e-05	0.00144353	0.0625989	0.541173
BMP2	5.65907	-3.02e-07	0.00144269	0.0626128	0.541173
CACNB1	383.266	7.07e-06	0.00144268	0.0626239	0.541173
PHLDB2	294.182	2.14e-06	0.00144269	0.0626521	0.541173
LGR5	1.34395	-1.16e-06	0.00144269	0.0627438	NA
PRPS1P2	25.7416	-4.27e-06	0.00144269	0.0627479	0.541335
BRMS1L	336.923	-6.21e-06	0.00144269	0.0627494	0.541335
KLF7-IT1	2.27296	-4.94e-07	0.00144269	0.0628614	0.541335
OR2T2	10.8447	-9.93e-07	0.00144269	0.062863	0.541335
FAM219A	757.387	-3.13e-06	0.00144269	0.0628945	0.541335
GTF2IRD1P1	5.2377	-1.63e-06	0.00144269	0.0629009	0.541335
ATP13A4	44.1383	-4.02e-06	0.0014427	0.0629249	0.541335
ENSAP2	5.12916	-2.95e-06	0.00144269	0.0629344	0.541335
ZNF608	371.441	1.34e-06	0.00144269	0.0630457	0.541575
DNAJC16	901.423	-6.74e-06	0.00144269	0.0630669	0.541575
ZNF768	1164.24	-3.89e-06	0.00144269	0.0630946	0.541575
ESRP1	56.7627	-1.04e-06	0.00144269	0.0631136	0.541575
ITM2B	3022.61	-1.31e-05	0.00144272	0.0631572	0.541575
AXDND1	13.0266	-1.73e-06	0.00144269	0.0631601	0.541575
CYYR1	11.7233	-7.65e-07	0.00144269	0.0633399	0.542833
CCDC144A	92.1633	8.42e-07	0.00144269	0.063388	0.542905
PPP1R35	711.833	3.5e-06	0.00144269	0.0634678	0.542905
ACHE	3.31493	1.49e-06	0.00144269	0.0635091	0.542905
E2F2	1290.44	5.74e-05	0.00144326	0.0635363	0.542905
RCOR3	1373.42	-5.05e-06	0.00144269	0.0635486	0.542905
SIK3-IT1	45.4452	-4.87e-06	0.00144269	0.0635756	0.542905
NTNG2	106.174	1.74e-06	0.00144269	0.0635796	0.542905
RPL3P6	18.8143	-1.34e-06	0.00144269	0.0636304	0.542921
CEP112	125.544	1.76e-06	0.00144269	0.0636476	0.542921
FAM220CP	7.23475	-9.82e-07	0.00144269	0.0637932	0.543881
PSCA	3.16015	-1.49e-06	0.00144269	0.0639024	0.544529
DNMT3B	312.039	1.88e-06	0.00144269	0.0639729	0.544753
KIAA0368	5327.46	6.38e-05	0.00144339	0.063995	0.544753
PNPLA8	1537.27	-4.44e-06	0.00144269	0.0640473	0.544819
BTN2A3P	57.6288	3.32e-06	0.00144269	0.064069	0.544819
CLIC3	3.42883	1.53e-06	0.00144269	0.0641405	0.54503
BZW1P1	1.16321	1.55e-06	0.00144269	0.0641698	NA
ZNF627	140.12	1.98e-06	0.00144269	0.0642734	0.54503
PDZRN4	2.92836	-4.06e-07	0.00144269	0.0643125	0.54503
DAND5	2.26578	-1.13e-06	0.00144269	0.0643368	0.54503
GNAS-AS1	15.9752	1.66e-06	0.00144269	0.0643798	0.54503
RPS2	55540.8	-6.14e-06	0.00144269	0.0644364	0.54503
UBD	1391.59	-5.62e-07	0.00144269	0.064456	0.54503
ORAI3	166.312	1.4e-06	0.00144269	0.0644791	0.54503
USP46	395.994	-2.97e-06	0.00144269	0.0644819	0.54503
RHOBTB1	6.07142	-2.62e-07	0.00144269	0.0644982	0.54503
ZDHHC18	1603.21	5.36e-06	0.00144269	0.0645028	0.54503
IRAK1	3369.66	5.41e-06	0.00144269	0.0645225	0.54503
IGHV3-15	1.50692	9.52e-07	0.00144269	0.0645251	0.54503
XIAP	1939.9	-7.17e-06	0.00144269	0.0646495	0.5458
VPS37C	202.084	-3.16e-06	0.00144269	0.0646853	0.545822
TRPM2	185.738	9.01e-07	0.00144269	0.0647596	0.546168
NBPF20	99.5747	-5.03e-06	0.00144269	0.064833	0.546506
MNDA	1.89308	-1.06e-06	0.00144269	0.0649691	0.547373
PSPC1	3086.51	-8.84e-05	0.00144402	0.0650503	0.547584
C16orf3	3.16138	-8.11e-07	0.00144269	0.0650608	0.547584
ATP10A	10.0817	-6.2e-07	0.00144269	0.0651177	0.547782
ZNF107	1899.31	7.42e-06	0.00144269	0.065188	0.548093
NAA10	1784.61	5.91e-06	0.00144269	0.0653564	0.548775
PDZD2	96.6993	-5.43e-06	0.0014427	0.0653596	0.548775
TOX2	871.177	1.13e-06	0.00144269	0.0654092	0.548775
NXF4	2.21387	-4.52e-07	0.00144269	0.0654257	0.548775
ASB7	966.467	1.92e-06	0.00144269	0.0654362	0.548775
CCDC85C	256.635	1.92e-06	0.00144269	0.0654812	0.548806
DNAI1	19.5746	-1.43e-06	0.00144269	0.0655203	0.548806
HCN4	1.359	1.37e-06	0.00144269	0.0655221	NA
MEPE	2.9148	-5.89e-07	0.00144269	0.0655401	0.548806
ABHD11-AS1	13.9396	-1.41e-06	0.00144269	0.0656283	0.549085
TRIM38	1442.42	-8.7e-06	0.00144269	0.0656402	0.549085
WRAP53	592.814	9.87e-06	0.0014427	0.0657006	0.549254
PIP5K1A	3359.6	-8.92e-06	0.00144269	0.0657273	0.549254
PDDC1	692.425	3.18e-06	0.00144269	0.0658246	0.549354
PAQR6	157.852	-4.56e-06	0.00144269	0.0658343	0.549354
CD38	1227.46	1.41e-06	0.00144269	0.0658395	0.549354
C20orf26	14.6789	-5.96e-07	0.00144269	0.0658762	0.549381
RALB	5465.7	-1.75e-06	0.00144269	0.0661158	0.550987
OR51B8P	2.40177	-4.64e-07	0.00144269	0.0661359	0.550987
PCDHGA5	15.1571	2.84e-06	0.00144269	0.0661819	0.551009
NRN1	1.71552	6.69e-07	0.00144269	0.0662322	0.551009
PGS1	631.001	1.86e-05	0.00144274	0.0662391	0.551009
HYDIN	5.6648	-1.23e-06	0.00144269	0.0663494	0.551615
CMA1	2.48716	-1.02e-06	0.00144269	0.0664125	0.551615
ZPLD1	4.30962	-9.95e-07	0.00144269	0.0664127	0.551615
ZNF585B	434.036	2.24e-06	0.00144269	0.0664563	0.551698
MAGED2	959.703	3.7e-06	0.00144269	0.0665791	0.552438
RPL39	4127.45	5.31e-06	0.00144269	0.0666136	0.552446
CDK16	1657.53	-6.12e-06	0.00144269	0.0666648	0.552453
INTU	2.6107	-9.79e-07	0.00144269	0.0666818	0.552453
NUP160	1956.45	8.07e-06	0.00144269	0.0668159	0.552944
TYRP1	4.06942	-9.41e-07	0.00144269	0.0668348	0.552944
LANCL1	1884.28	-5.53e-06	0.00144269	0.066842	0.552944
[truncated: 16,195 more rows]

## Sheet: Table S2
Supplementary Table 2. Differentially regulated pathways in sensitive versus resistant NKTCL cell lines
NAME	NES	ES	FDR q-val	NOM p-val	FWER p-val	RANK AT MAX	LEADING EDGE
HALLMARK_MYC_TARGETS_V2	1.7674	0.685488	0	0	0	11072	tags=74%, list=21%, signal=94%
HALLMARK_E2F_TARGETS	1.66684	0.57257	0.00278251	0	0.006	13474	tags=63%, list=26%, signal=84%
HALLMARK_G2M_CHECKPOINT	1.65792	0.568045	0.00217247	0	0.007	13504	tags=66%, list=26%, signal=89%
HALLMARK_INTERFERON_ALPHA_RESPONSE	1.64684	0.596586	0.0022969	0	0.01	10252	tags=58%, list=20%, signal=72%
HALLMARK_MYC_TARGETS_V1	1.57995	0.543522	0.00530606	0	0.027	13360	tags=62%, list=26%, signal=83%
HALLMARK_OXIDATIVE_PHOSPHORYLATION	1.50872	0.517601	0.0134611	0	0.083	13971	tags=62%, list=27%, signal=85%
HALLMARK_DNA_REPAIR	1.41787	0.496165	0.0419853	0.00331126	0.277	11594	tags=48%, list=22%, signal=61%
HALLMARK_PI3K_AKT_MTOR_SIGNALING	1.3661	0.494044	0.0779489	0.0131422	0.485	10309	tags=44%, list=20%, signal=55%
HALLMARK_MITOTIC_SPINDLE	1.35773	0.460762	0.0792161	0.00537634	0.538	13330	tags=54%, list=26%, signal=72%
HALLMARK_WNT_BETA_CATENIN_SIGNALING	1.28432	0.5155	0.176348	0.0887199	0.884	13123	tags=48%, list=25%, signal=64%
HALLMARK_ADIPOGENESIS	1.24838	0.428082	0.242781	0.0426894	0.966	11508	tags=46%, list=22%, signal=59%
HALLMARK_MTORC1_SIGNALING	1.22323	0.420767	0.289563	0.0625674	0.987	9938	tags=39%, list=19%, signal=48%
HALLMARK_PEROXISOME	1.21212	0.435359	0.299455	0.0961538	0.993	11206	tags=44%, list=22%, signal=56%
HALLMARK_INTERFERON_GAMMA_RESPONSE	1.18821	0.406868	0.347587	0.099675	0.997	10498	tags=43%, list=20%, signal=54%
HALLMARK_FATTY_ACID_METABOLISM	1.14256	0.396772	0.494338	0.165758	1	12339	tags=44%, list=24%, signal=58%
HALLMARK_MYOGENESIS	1.1202	0.382335	0.556618	0.204989	1	12251	tags=40%, list=24%, signal=53%
HALLMARK_UV_RESPONSE_DN	1.09989	0.387324	0.606411	0.239229	1	10239	tags=41%, list=20%, signal=50%
HALLMARK_ESTROGEN_RESPONSE_EARLY	1.09888	0.37689	0.576541	0.229543	1	11218	tags=43%, list=22%, signal=54%
HALLMARK_ALLOGRAFT_REJECTION	1.09237	0.369897	0.573363	0.26455	1	11007	tags=44%, list=21%, signal=55%
HALLMARK_HEME_METABOLISM	1.08335	0.369496	0.580566	0.256216	1	10876	tags=37%, list=21%, signal=46%
HALLMARK_COMPLEMENT	1.07561	0.369289	0.583663	0.300211	1	8435	tags=34%, list=16%, signal=40%
HALLMARK_ESTROGEN_RESPONSE_LATE	1.07252	0.365841	0.569636	0.309574	1	10431	tags=36%, list=20%, signal=45%
HALLMARK_IL2_STAT5_SIGNALING	1.06207	0.36027	0.583545	0.334778	1	12066	tags=42%, list=23%, signal=55%
HALLMARK_UNFOLDED_PROTEIN_RESPONSE	1.03788	0.372776	0.65081	0.392736	1	14008	tags=50%, list=27%, signal=68%
HALLMARK_UV_RESPONSE_UP	1.03557	0.360329	0.633559	0.387912	1	11496	tags=39%, list=22%, signal=51%
HALLMARK_APOPTOSIS	1.02475	0.356931	0.647901	0.430804	1	11128	tags=39%, list=22%, signal=50%
HALLMARK_NOTCH_SIGNALING	1.01871	0.436707	0.644849	0.427586	1	8245	tags=38%, list=16%, signal=45%
HALLMARK_TGF_BETA_SIGNALING	1.00532	0.390444	0.667981	0.472569	1	9840	tags=43%, list=19%, signal=53%
HALLMARK_ANDROGEN_RESPONSE	0.97897	0.354052	0.732897	0.513143	1	11818	tags=43%, list=23%, signal=55%
HALLMARK_XENOBIOTIC_METABOLISM	0.969177	0.329642	0.739746	0.570964	1	11989	tags=37%, list=23%, signal=48%
HALLMARK_GLYCOLYSIS	0.949546	0.324894	0.773423	0.619914	1	13918	tags=44%, list=27%, signal=60%
HALLMARK_IL6_JAK_STAT3_SIGNALING	0.933751	0.343602	0.796828	0.60117	1	7336	tags=31%, list=14%, signal=36%
HALLMARK_INFLAMMATORY_RESPONSE	0.908956	0.310635	0.84121	0.722462	1	10771	tags=33%, list=21%, signal=42%
HALLMARK_SPERMATOGENESIS	0.905427	0.319596	0.825484	0.712375	1	11664	tags=36%, list=23%, signal=46%
HALLMARK_HYPOXIA	0.892464	0.304063	0.834023	0.745161	1	11439	tags=32%, list=22%, signal=42%
HALLMARK_REACTIVE_OXYGEN_SPECIES_PATHWAY	0.87394	0.343264	0.854032	0.696361	1	14595	tags=53%, list=28%, signal=74%
HALLMARK_P53_PATHWAY	0.812155	0.278293	0.954245	0.900755	1	8010	tags=26%, list=15%, signal=30%
HALLMARK_BILE_ACID_METABOLISM	0.797729	0.284009	0.951631	0.889655	1	6178	tags=18%, list=12%, signal=20%
HALLMARK_PANCREAS_BETA_CELLS	0.794852	0.321889	0.931537	0.846053	1	10594	tags=30%, list=20%, signal=38%
HALLMARK_APICAL_SURFACE	0.793778	0.321481	0.909764	0.824903	1	13897	tags=47%, list=27%, signal=64%

## Sheet: Table S3
Supplementary Table 3. Clinicopathological features of patient cohort with NKTCL
	TLE1-high	TLE1-low	p-value, Fisher exact test
n (%)	39 (100)	14 (100)
Age (years)
≥ 60	10 (25.6)	4 (28.6)	1
< 60	29 (74.4)	10 (71.4)
Stage
I-II	28 (71.8)	7 (50.0)	0.191
III-IV	11 (28.2)	7 (50.0)
B-symptoms
Yes	10 (25.6)	6 (42.9)	0.311
No	29 (74.4)	8 (57.1)

## Sheet: Table S4
Supplementary Table 4. Differentially regulated genes in TLE1-low and TLE1-high NKTCL tumor samples
Gene	baseMean	log2FoldChange	lfcSE	pvalue	padj
SERPINB11	58.7676	-26.0547	1.33695	1.38331e-84	2.04094e-80
TEKT1	123.54	-26.9119	1.70663	5.08591e-56	3.75188e-52
TLE1	444.675	-9.82697	0.673202	2.91945e-48	1.43579e-44
TMEM190	35.5876	-25.3676	1.89487	7.15415e-41	2.63881e-37
SLURP1	28.9441	-23.9759	1.93807	3.7504e-35	1.10667e-31
RNF103	967.202	-9.06952	0.791719	2.20724e-30	5.42761e-27
PALMD	753.39	-9.07196	0.808199	3.07689e-29	6.4852e-26
CPE	727.739	-8.67977	0.78423	1.79599e-28	3.31226e-25
MGAM2	412.177	-8.87595	0.814157	1.12737e-27	1.84813e-24
SPRR2G	39.6485	-25.5265	2.39645	1.71021e-26	2.52325e-23
HOMER2	508.195	-9.95641	0.943335	4.84317e-26	6.49602e-23
ADAM15	1860.99	-8.76123	0.858221	1.81463e-24	2.23109e-21
SLC49A4	417.165	-7.94196	0.77979	2.31993e-24	2.63294e-21
IL17RD	210.685	-9.38928	0.928721	4.99384e-24	5.2628e-21
OSBPL10	365.748	-9.02819	0.89551	6.66198e-24	6.55272e-21
NFIX	768.928	-7.91782	0.788389	9.8593e-24	9.0915e-21
RHOBTB1	221.766	-8.43779	0.843075	1.40069e-23	1.21563e-20
TMPRSS13	180.242	-9.16144	0.926622	4.74389e-23	3.88058e-20
ZG16B	299.469	-9.88138	0.999967	4.99736e-23	3.88058e-20
EGFL7	326.302	-8.58022	0.869247	5.56787e-23	4.10742e-20
SMAD9	186.257	-8.65482	0.879	7.11744e-23	5.00051e-20
ADGRB3	73.8854	-7.8544	0.798718	8.05468e-23	5.40176e-20
SYNGR1	228.477	-9.28134	0.945583	9.65841e-23	6.19566e-20
FAM107A	318.518	-9.96905	1.01806	1.21634e-22	7.47743e-20
CAV1	836.035	-9.07913	0.927975	1.3215e-22	7.79894e-20
KCNQ1	353.127	-7.81183	0.805356	3.01964e-22	1.71353e-19
IL17RC	363.967	-7.85372	0.811322	3.66197e-22	2.00107e-19
SERPINA3	544.977	-9.11846	0.943802	4.39762e-22	2.29627e-19
TCEAL1	151.911	-8.46776	0.876693	4.51348e-22	2.29627e-19
ZNF395	631.05	-9.03874	0.936766	4.96995e-22	2.44422e-19
OR10W1	30.7715	-25.1714	2.61342	5.8816e-22	2.79926e-19
AK9	90.5307	-7.94089	0.825909	6.92877e-22	3.1946e-19
EFS	163.593	-8.69147	0.906205	8.7182e-22	3.89783e-19
THNSL2	251.063	-8.80199	0.920461	1.14849e-21	4.98379e-19
MXI1	409.549	-7.35782	0.77158	1.48392e-21	6.25534e-19
TFCP2L1	197.359	-9.2874	0.976015	1.80614e-21	7.40217e-19
ZNF358	331.062	-8.2195	0.864957	2.04346e-21	8.14843e-19
ITGBL1	149.888	-7.54457	0.807623	9.47981e-21	3.68066e-18
TMEM254	214.671	-7.85966	0.843211	1.15133e-20	4.24667e-18
ZNF662	117.68	-8.21751	0.881461	1.13516e-20	4.24667e-18
KLF8	182.228	-9.0069	0.967429	1.27657e-20	4.59378e-18
GCNT2	784.177	-7.87074	0.846977	1.50366e-20	5.28215e-18
NTRK3	102.251	-8.23942	0.888601	1.82072e-20	6.2472e-18
MGP	530.511	-7.92832	0.862016	3.66656e-20	1.22946e-17
ANKRD35	256.381	-8.94758	0.975183	4.50361e-20	1.47658e-17
BOC	620.601	-8.42351	0.924362	8.03015e-20	2.57558e-17
ARMCX5	298.398	-8.08989	0.889973	9.89964e-20	3.10765e-17
FAM171B	373.002	-8.11679	0.893454	1.03954e-19	3.13008e-17
TNFRSF11A	152.675	-8.91518	0.981311	1.03727e-19	3.13008e-17
HSPA12A	218.291	-8.75767	0.970124	1.75849e-19	5.18894e-17
PPP2R3A	331.689	-7.51151	0.832703	1.86989e-19	5.40948e-17
CYLC2	24.8445	-24.7804	2.75331	2.2525e-19	6.39104e-17
SMARCD3	288.188	-7.25746	0.807841	2.61639e-19	7.28343e-17
RNASE6	275.105	-6.82145	0.761974	3.48002e-19	9.5082e-17
KRT10	300.535	-9.46267	1.05732	3.56649e-19	9.56727e-17
MAPK8IP1	300.916	-9.4745	1.06083	4.21236e-19	1.10981e-16
WNT5A	319.693	-8.71925	0.978173	4.93056e-19	1.27624e-16
PELI3	115.328	-8.29496	0.930958	5.0974e-19	1.29667e-16
PLSCR4	186.344	-7.96213	0.893871	5.22104e-19	1.30561e-16
TMEM170B	224.602	-8.2152	0.92437	6.25847e-19	1.53896e-16
KANK1	931.306	-7.16704	0.811646	1.04448e-18	2.52628e-16
DUSP23	110.797	-7.90838	0.896868	1.16759e-18	2.77848e-16
SNCAIP	277.414	-7.79142	0.885234	1.34962e-18	3.16068e-16
IGFBP6	181.19	-8.02602	0.913653	1.57017e-18	3.56404e-16
PINK1	829.575	-7.96615	0.906681	1.54899e-18	3.56404e-16
NPNT	238.103	-7.03394	0.80168	1.72438e-18	3.85478e-16
CTNNBIP1	266.777	-7.49755	0.856015	1.97582e-18	4.35093e-16
B3GALNT1	146.996	-8.85439	1.0129	2.29858e-18	4.98724e-16
FMO1	113.19	-8.01472	0.917956	2.52315e-18	5.39515e-16
CRABP2	441.394	-8.76032	1.00402	2.65706e-18	5.60031e-16
ALDH1A2	172.189	-9.13131	1.04972	3.35337e-18	6.93296e-16
AMIGO1	103.099	-8.25192	0.948735	3.38331e-18	6.93296e-16
ADGRL4	701.187	-7.35982	0.846417	3.46007e-18	6.99313e-16
KCNT2	65.2152	-7.39603	0.850946	3.57565e-18	7.12907e-16
B3GNT9	411.784	-9.63723	1.10927	3.69231e-18	7.26351e-16
ARHGEF4	419.414	-8.91235	1.02674	3.9505e-18	7.65854e-16
DNAH14	136.576	-8.06954	0.929791	3.99693e-18	7.65854e-16
OR52A5	4.45101	-22.4751	2.59149	4.22168e-18	7.98547e-16
IGHV3-7	234.861	-7.62851	0.879914	4.3361e-18	8.09807e-16
INPP5A	188.395	-7.94227	0.921742	6.89824e-18	1.27221e-15
CD1D	93.985	-7.65261	0.888781	7.29143e-18	1.32812e-15
ZNF396	99.6786	-8.24769	0.959386	8.19398e-18	1.47432e-15
LXN	415.257	-7.4665	0.869305	8.76931e-18	1.55882e-15
FKBP9	871.481	-7.90343	0.920666	9.12585e-18	1.60289e-15
KLC4	499.872	-6.98903	0.814833	9.71648e-18	1.68655e-15
DEGS2	140.054	-8.7762	1.02579	1.17271e-17	1.98876e-15
ZNF205	170.54	-7.35002	0.858992	1.16283e-17	1.98876e-15
USP51	80.9079	-6.99554	0.818775	1.2976e-17	2.17554e-15
NAPRT	678.43	-7.36591	0.862669	1.35966e-17	2.25398e-15
CNTNAP3B	125.948	-6.95406	0.814834	1.40964e-17	2.31088e-15
ATP6V1C2	111.984	-8.86766	1.0422	1.75995e-17	2.85345e-15
NEURL1B	184.79	-8.60641	1.01233	1.87031e-17	2.97929e-15
SPRR2B	4.81558	-22.6639	2.66604	1.87999e-17	2.97929e-15
ZNF219	528.074	-7.09709	0.834965	1.89815e-17	2.97929e-15
MID2	337.091	-7.66277	0.902407	2.04025e-17	3.16861e-15
KCTD21	165.406	-7.06883	0.832845	2.11001e-17	3.24282e-15
EDIL3	94.9036	-8.18771	0.965063	2.17358e-17	3.30609e-15
B4GAT1	170.103	-7.81612	0.925487	3.02966e-17	4.56119e-15
ANKRD9	217.569	-7.60358	0.901107	3.22684e-17	4.80898e-15
CSTA	491.549	-6.62325	0.785408	3.37286e-17	4.97632e-15
LRRN1	307.206	-9.02623	1.07058	3.422e-17	4.99883e-15
THSD7A	332.155	-6.93497	0.823218	3.63134e-17	5.25262e-15
ZNF860	76.1415	-6.79088	0.806671	3.81682e-17	5.46732e-15
IGLV2-14	438.852	-7.64634	0.909274	4.1252e-17	5.85223e-15
RAPGEF5	435.329	-7.11884	0.846771	4.20504e-17	5.90869e-15
PRKN	78.2947	-7.94719	0.945857	4.38536e-17	6.10393e-15
ANXA8	164.108	-10.3708	1.23554	4.70972e-17	6.31702e-15
GGT7	196.83	-7.10126	0.845931	4.67426e-17	6.31702e-15
IMPA2	369.15	-8.11216	0.966329	4.66621e-17	6.31702e-15
TPD52L1	122.817	-8.58647	1.02287	4.6778e-17	6.31702e-15
C8orf58	94.8166	-7.18827	0.857	4.95712e-17	6.58896e-15
HHAT	264.818	-8.17533	0.975392	5.2218e-17	6.85802e-15
TMEM45A	176.467	-7.85197	0.936888	5.25252e-17	6.85802e-15
KLK13	108.071	-11.1793	1.33449	5.42068e-17	6.99259e-15
NOS2	230.562	-8.85874	1.05765	5.48262e-17	6.99259e-15
PLAG1	98.3305	-8.18866	0.977689	5.49777e-17	6.99259e-15
IGHV3-48	169.856	-9.1003	1.08785	5.9925e-17	7.55669e-15
FAXDC2	158.55	-8.53843	1.0211	6.16625e-17	7.70991e-15
GNG12	329.226	-8.30429	0.993603	6.39233e-17	7.92542e-15
PLPPR4	97.4266	-6.33976	0.758791	6.5389e-17	7.97314e-15
SERPINB13	229.017	-11.4231	1.36704	6.48674e-17	7.97314e-15
MINDY1	199.028	-7.76778	0.93085	7.132e-17	8.62504e-15
LRATD2	344.197	-8.51287	1.02106	7.6025e-17	9.11929e-15
THRB	285.863	-8.00707	0.960858	7.86507e-17	9.35816e-15
ODAM	238.41	-12.2629	1.47583	9.63801e-17	1.13084e-14
TSKU	740.09	-8.0338	0.966888	9.65743e-17	1.13084e-14
TGM1	811.505	-7.66388	0.923192	1.02804e-16	1.1943e-14
ZNF334	246.841	-7.86203	0.947868	1.09103e-16	1.25759e-14
BDKRB2	256.33	-8.36521	1.00895	1.12288e-16	1.28426e-14
CHST3	385.642	-7.04181	0.850981	1.28534e-16	1.45876e-14
MXRA8	460.479	-7.12087	0.861178	1.35357e-16	1.52447e-14
LYPD3	1125.72	-8.56917	1.03784	1.49694e-16	1.67317e-14
OR2AG1	60.6456	-26.1144	3.16384	1.53169e-16	1.69913e-14
CPA3	99.5947	-7.13613	0.865265	1.61963e-16	1.78329e-14
IGHV3-74	149.295	-8.77724	1.06844	2.12134e-16	2.31839e-14
PLEKHA1	438.257	-7.07647	0.861882	2.20289e-16	2.38981e-14
CILK1	262.313	-6.29442	0.767119	2.30066e-16	2.47766e-14
CSRP2	170.652	-7.73945	0.944004	2.43335e-16	2.60156e-14
STOX2	279.651	-7.41373	0.905179	2.6047e-16	2.75409e-14
TRMT9B	264.815	-7.8645	0.960262	2.61335e-16	2.75409e-14
ZNF677	180.407	-6.76148	0.826443	2.80512e-16	2.93523e-14
MMP16	62.0893	-7.48212	0.917079	3.38818e-16	3.52037e-14
PHETA1	111.092	-7.73759	0.948517	3.41821e-16	3.52673e-14
KLF4	698.83	-7.11526	0.87449	4.06963e-16	4.16968e-14
TINAGL1	812.523	-7.9159	0.973402	4.21558e-16	4.28943e-14
IGHV3-33	122.841	-8.63944	1.06287	4.35089e-16	4.39678e-14
CDC42EP1	515.595	-6.60538	0.812837	4.42465e-16	4.4409e-14
PAX6	149.961	-9.78999	1.20506	4.50719e-16	4.49318e-14
CLEC14A	534.477	-7.48113	0.921167	4.60991e-16	4.56474e-14
SERPINB4	462.995	-11.1058	1.3685	4.84576e-16	4.76629e-14
PTPN21	225.487	-7.31424	0.901913	5.07475e-16	4.95847e-14
IGLV3-10	136.356	-8.8788	1.0957	5.34928e-16	5.19232e-14
COL9A2	92.5114	-7.21397	0.892657	6.39976e-16	6.13131e-14
FZD8	114.604	-6.89821	0.853578	6.39663e-16	6.13131e-14
TRIP6	609.779	-7.30757	0.907434	8.07854e-16	7.68973e-14
DDO	90.651	-8.07667	1.00488	9.16995e-16	8.67265e-14
GSTA4	120.772	-7.57914	0.94333	9.39967e-16	8.77738e-14
VMO1	352.29	-7.25395	0.902817	9.37315e-16	8.77738e-14
TLR5	381.669	-7.32199	0.911721	9.67147e-16	8.9744e-14
IGHV3-21	345.405	-7.75684	0.965963	9.73435e-16	8.97628e-14
STARD5	212.899	-7.24792	0.902722	9.8306e-16	9.00874e-14
CYP4X1	190.619	-7.97157	0.993475	1.02419e-15	9.32774e-14
CPTP	148.612	-7.72703	0.963174	1.03647e-15	9.36603e-14
SDCBP2	253.662	-8.4791	1.05699	1.04109e-15	9.36603e-14
SHROOM4	1247.54	-7.11005	0.886817	1.07925e-15	9.65048e-14
TEF	190.878	-7.47349	0.93249	1.10538e-15	9.82453e-14
GATA2	92.4507	-6.69064	0.83656	1.26664e-15	1.11904e-13
OCRL	688.634	-6.50285	0.81359	1.31928e-15	1.15861e-13
CCL28	76.8325	-7.07557	0.885804	1.37431e-15	1.1998e-13
BAIAP3	125.097	-8.65	1.08312	1.39152e-15	1.20767e-13
PALM	133.932	-7.05738	0.884689	1.49633e-15	1.29104e-13
ALDH3A1	116.167	-9.0837	1.13894	1.51688e-15	1.30117e-13
WTIP	179.19	-7.47432	0.937475	1.55095e-15	1.3227e-13
ZNF300	150.386	-6.84405	0.858594	1.57096e-15	1.33207e-13
KCTD15	270.766	-7.4056	0.929202	1.58863e-15	1.33935e-13
EMCN	122.438	-7.47948	0.938682	1.6118e-15	1.35117e-13
HLA-G	187.607	-6.57574	0.825529	1.64572e-15	1.3718e-13
BEND7	109.098	-8.40929	1.0574	1.82331e-15	1.50608e-13
SHB	148.359	-7.34957	0.924178	1.82723e-15	1.50608e-13
SYTL4	290.271	-7.97002	1.00331	1.96174e-15	1.60797e-13
LYNX1	157.6	-8.98228	1.1309	1.97939e-15	1.61347e-13
P2RX1	36.6728	-6.58889	0.829931	2.03684e-15	1.65119e-13
IQCA1	108.002	-7.92482	0.998997	2.14293e-15	1.72247e-13
LIAT1	117.758	-7.49332	0.944638	2.14813e-15	1.72247e-13
KDELR3	126.548	-8.67313	1.09475	2.3284e-15	1.85693e-13
HOXA1	90.6205	-7.07528	0.893701	2.43644e-15	1.93264e-13
ANO2	112.2	-8.04693	1.01752	2.60842e-15	2.058e-13
MASP1	200.114	-7.92323	1.00305	2.80858e-15	2.20414e-13
RILPL1	182.26	-6.49331	0.822317	2.87156e-15	2.24164e-13
BARX2	151.258	-7.22245	0.915177	2.97713e-15	2.29971e-13
TMEM54	157.808	-7.91724	1.0032	2.97442e-15	2.29971e-13
ZNF442	98.7839	-6.69598	0.848862	3.06596e-15	2.356e-13
PLEKHN1	71.6631	-7.56798	0.9597	3.12576e-15	2.38951e-13
AREG	90.6498	-7.76851	0.985439	3.18846e-15	2.39151e-13
JAG2	393.975	-7.85889	0.996886	3.18499e-15	2.39151e-13
LRP5	976.24	-7.50017	0.951388	3.1859e-15	2.39151e-13
TEX9	85.6631	-7.17106	0.909673	3.19322e-15	2.39151e-13
L1TD1	59.9928	-7.25133	0.920332	3.29916e-15	2.45838e-13
MMP7	97.5392	-8.42448	1.07078	3.61509e-15	2.68025e-13
GRHL3	156.469	-8.22543	1.04559	3.63822e-15	2.68392e-13
KCTD11	383.538	-6.79868	0.864902	3.82199e-15	2.80545e-13
XKR8	184.707	-6.84989	0.871882	3.95219e-15	2.88667e-13
ANXA8L1	286.691	-9.22824	1.17514	4.06684e-15	2.95577e-13
CIART	55.5878	-7.45682	0.949944	4.16849e-15	3.0148e-13
CPEB3	476.694	-5.66242	0.72226	4.51045e-15	3.2462e-13
PDE7B	112.66	-7.73291	0.98664	4.59152e-15	3.28851e-13
ADRB2	383.743	-7.11093	0.907621	4.69992e-15	3.34988e-13
ZNF517	141.477	-5.99959	0.765968	4.7753e-15	3.38725e-13
IGKV2-30	672.068	-7.4854	0.956642	5.09024e-15	3.59337e-13
SLC5A1	92.7579	-9.16377	1.17185	5.28558e-15	3.7135e-13
SYT7	47.4894	-7.28324	0.932948	5.87071e-15	4.10505e-13
EPHX3	172.931	-8.74013	1.12037	6.13813e-15	4.27179e-13
C1orf56	65.5856	-7.67479	0.984438	6.38447e-15	4.42237e-13
SNAI2	356.698	-7.66831	0.98478	6.87122e-15	4.73729e-13
TNFAIP8L3	102.529	-7.91553	1.0172	7.15799e-15	4.91204e-13
RAB3D	452.976	-7.42958	0.955715	7.6138e-15	5.20065e-13
EFCAB2	60.8545	-6.61083	0.850685	7.77576e-15	5.2868e-13
PDE5A	205.761	-6.49641	0.836236	7.93406e-15	5.36969e-13
ATP1A2	50.3953	-7.65891	0.987107	8.56356e-15	5.74304e-13
TXLNB	49.8529	-6.4797	0.835101	8.54796e-15	5.74304e-13
STRA6	78.8254	-7.29231	0.940043	8.66766e-15	5.78655e-13
MARVELD3	139.688	-7.81858	1.00854	9.01718e-15	5.99087e-13
TMEM9	273.763	-7.098	0.91565	9.05492e-15	5.99087e-13
FAM83H	828.743	-7.79561	1.00841	1.0705e-14	7.05097e-13
RTKN	181.233	-6.83738	0.884823	1.09769e-14	7.19789e-13
VIPR1	85.7381	-8.06443	1.04399	1.12155e-14	7.32183e-13
ARMCX1	366.144	-6.72454	0.87091	1.15163e-14	7.48285e-13
PCDHB14	46.3743	-6.88501	0.891759	1.15682e-14	7.48285e-13
SPATA31D3	42.2527	-25.6126	3.31761	1.16143e-14	7.48285e-13
BCL2L15	130.472	-7.58937	0.983695	1.20823e-14	7.75055e-13
ARL4D	176.182	-8.18862	1.06187	1.24308e-14	7.92948e-13
ZNF423	180.848	-6.15862	0.798664	1.24687e-14	7.92948e-13
ZNF415	208.232	-7.09194	0.920101	1.28019e-14	8.10639e-13
GPRC5A	568.772	-7.86478	1.02049	1.28938e-14	8.12973e-13
CERS4	354.6	-6.53879	0.848636	1.30788e-14	8.1757e-13
CTBS	815.512	-6.05567	0.785989	1.3133e-14	8.1757e-13
FGD1	155.907	-7.1455	0.927435	1.31271e-14	8.1757e-13
GPR39	92.5997	-8.2261	1.06797	1.33345e-14	8.23482e-13
SFRP4	272.062	-7.45966	0.968469	1.33396e-14	8.23482e-13
GPR161	350.282	-7.31854	0.950315	1.3482e-14	8.28803e-13
APCDD1	252.282	-7.41572	0.963592	1.40485e-14	8.60048e-13
EFHD1	43.504	-7.31718	0.950943	1.41875e-14	8.6497e-13
NHS	482.147	-6.10264	0.794445	1.57066e-14	9.53643e-13
DUSP21	37.7796	-25.4481	3.31763	1.71227e-14	1.03536e-12
MAGEA1	11.7866	-23.8755	3.11354	1.74351e-14	1.04995e-12
KRT6C	530.168	-10.7687	1.40493	1.78905e-14	1.073e-12
XKRX	80.2312	-7.22929	0.943316	1.80653e-14	1.07909e-12
OR2A7	57.222	-6.85124	0.894275	1.84175e-14	1.09569e-12
CTSV	191.658	-8.35683	1.0916	1.92421e-14	1.14015e-12
EVA1C	213.407	-7.16649	0.936229	1.93861e-14	1.14409e-12
ZNF501	137.249	-6.09229	0.795968	1.94928e-14	1.1458e-12
CERS3	70.3089	-7.23361	0.945209	1.96453e-14	1.15019e-12
ADGRL3	152.712	-7.72912	1.01122	2.11616e-14	1.23406e-12
ZNF763	83.9733	-5.66785	0.741722	2.14731e-14	1.2473e-12
ASPN	61.4204	-7.86177	1.02911	2.18231e-14	1.258e-12
GPC1	551.591	-7.72446	1.01128	2.20158e-14	1.258e-12
ITGA8	340.417	-7.69337	1.00718	2.19781e-14	1.258e-12
SPEF2	311.111	-6.85176	0.897077	2.20836e-14	1.258e-12
SUSD2	241.351	-5.82642	0.762789	2.20097e-14	1.258e-12
OTX1	157.361	-8.24336	1.07984	2.27759e-14	1.29245e-12
DGCR2	1347.99	-6.8624	0.899525	2.36745e-14	1.33829e-12
P2RY2	339.312	-7.75668	1.0173	2.44451e-14	1.37657e-12
LRGUK	50.0926	-6.9557	0.913341	2.62345e-14	1.47173e-12
TUBB2A	652.159	-6.42902	0.845283	2.83225e-14	1.58284e-12
ADGRL1	370.001	-6.72336	0.884839	2.99819e-14	1.66298e-12
AXIN2	312.382	-6.77533	0.891677	2.99784e-14	1.66298e-12
RASSF9	130.727	-6.79444	0.894453	3.04969e-14	1.68521e-12
ZBTB7C	161.718	-7.43563	0.979064	3.08656e-14	1.69922e-12
NRARP	107.339	-7.10496	0.936185	3.21713e-14	1.76452e-12
SLC26A4	163.161	-7.30214	0.962391	3.26133e-14	1.78213e-12
CAP2	85.6034	-8.05672	1.06242	3.36739e-14	1.82656e-12
FJX1	77.5039	-7.32098	0.96537	3.36089e-14	1.82656e-12
BAMBI	84.1512	-7.30518	0.963769	3.4608e-14	1.87036e-12
EPB41L5	243.826	-6.37543	0.842463	3.80136e-14	2.04691e-12
AKR1C3	143.421	-7.27718	0.962766	4.07389e-14	2.18568e-12
CCDC89	78.3204	-6.63296	0.87799	4.19805e-14	2.24413e-12
SOX15	60.8944	-7.36436	0.975118	4.27706e-14	2.27811e-12
IL17RE	101.845	-7.30625	0.967671	4.341e-14	2.30385e-12
AIF1L	99.8404	-7.52298	0.996506	4.37427e-14	2.30493e-12
GTF2IRD2	156.039	-5.95173	0.788361	4.36967e-14	2.30493e-12
ANKEF1	206.487	-7.01052	0.929584	4.64335e-14	2.42437e-12
DNAH3	288.005	-7.6548	1.01494	4.62327e-14	2.42437e-12
TMEM30B	236.17	-6.5446	0.867825	4.65024e-14	2.42437e-12
CNTNAP3	213.081	-6.85653	0.909408	4.71606e-14	2.44143e-12
SNCA	182.058	-7.15317	0.948742	4.7126e-14	2.44143e-12
DNAH2	116.067	-7.53589	0.999861	4.8114e-14	2.48208e-12
PWWP4	27.0322	-25.0039	3.31773	4.82947e-14	2.48272e-12
CRYL1	367.791	-6.51228	0.864585	4.98718e-14	2.55489e-12
ARHGEF37	278.001	-7.52693	0.999933	5.17485e-14	2.64186e-12
TAF11L5	26.4095	-24.9673	3.31774	5.25531e-14	2.67368e-12
PAX9	86.8181	-8.70938	1.15758	5.32196e-14	2.69829e-12
EYA2	300.39	-7.33845	0.975527	5.37187e-14	2.71426e-12
FBXL2	95.4005	-6.74215	0.896817	5.56806e-14	2.8038e-12
CACNA2D4	76.6496	-6.71697	0.893618	5.62173e-14	2.82078e-12
SYT15-AS1	23.3651	-6.1913	0.82373	5.64002e-14	2.82078e-12
IFTAP	45.1044	-7.15985	0.953368	5.91012e-14	2.93595e-12
KIT	218.576	-7.35178	0.978924	5.90986e-14	2.93595e-12
FAM228B	196.782	-6.86082	0.91362	5.93592e-14	2.93888e-12
TUFT1	223.835	-6.76526	0.901314	6.0964e-14	3.00824e-12
GSTM3	62.8965	-7.36892	0.9818	6.11853e-14	3.00909e-12
VWA3B	59.3616	-7.52026	1.00252	6.31717e-14	3.09646e-12
TMEM63B	937.202	-6.82867	0.910874	6.53775e-14	3.19397e-12
HEY1	130.878	-7.36946	0.983327	6.65954e-14	3.24274e-12
NOS3	409.133	-7.06599	0.942925	6.69604e-14	3.24978e-12
CALML3	162.559	-10.8626	1.45115	7.12674e-14	3.44747e-12
PPARGC1A	127.359	-6.37953	0.852892	7.43884e-14	3.58669e-12
INHBB	94.1908	-7.46687	0.99841	7.50306e-14	3.60587e-12
CDCP1	964.744	-6.79126	0.908881	7.89148e-14	3.78022e-12
P3H2	101.826	-6.30551	0.844259	8.09986e-14	3.86748e-12
SLC2A9	234.127	-5.8793	0.78756	8.31683e-14	3.95828e-12
GPR34	451.259	-6.85301	0.918488	8.57486e-14	4.06796e-12
TMC4	357.659	-6.9864	0.936621	8.70815e-14	4.11795e-12
LRRC32	319.138	-6.3782	0.855421	8.90421e-14	4.19721e-12
TRIL	240.4	-7.64644	1.02568	8.98607e-14	4.22231e-12
OPHN1	155.748	-5.7747	0.774678	9.0336e-14	4.23116e-12
PIR	111.48	-7.41896	0.995428	9.12185e-14	4.25898e-12
EXD3	133.029	-5.77181	0.775407	9.79911e-14	4.56076e-12
GNG11	62.13	-7.61088	1.02322	1.02112e-13	4.73328e-12
GPM6B	151.711	-7.35195	0.988451	1.0234e-13	4.73328e-12
FAM83A	73.0524	-8.26277	1.11105	1.03064e-13	4.75189e-12
ZNF229	128.718	-7.55914	1.01665	1.04275e-13	4.79274e-12
TEAD4	138.391	-6.98593	0.939725	1.05346e-13	4.82694e-12
MALL	341.293	-6.73782	0.906709	1.07718e-13	4.89921e-12
MANSC1	317.219	-6.49865	0.874576	1.0808e-13	4.89921e-12
RANBP17	170.428	-6.97982	0.939356	1.08251e-13	4.89921e-12
ZNF658B	74.6758	-7.87572	1.05985	1.07824e-13	4.89921e-12
FBLN5	296.082	-6.75196	0.909048	1.10663e-13	4.99301e-12
SLC35C1	388.845	-6.73349	0.906652	1.11291e-13	5.00608e-12
ROBO2	60.9709	-7.4214	0.999599	1.13314e-13	5.08155e-12
GJB2	587.626	-7.82022	1.054	1.17476e-13	5.25225e-12
DENND2C	210.958	-7.37621	0.99453	1.20004e-13	5.34107e-12
SUSD4	113.618	-7.15052	0.964127	1.20187e-13	5.34107e-12
SLC16A14	67.0819	-7.713	1.04003	1.20605e-13	5.34355e-12
CNKSR3	233.642	-6.26535	0.845124	1.22979e-13	5.43243e-12
TRIQK	43.4199	-7.10158	0.958709	1.2876e-13	5.67081e-12
CDC42EP5	190.501	-7.85225	1.06122	1.3695e-13	5.99572e-12
PLEKHS1	265.213	-7.65732	1.03486	1.3686e-13	5.99572e-12
ASB13	185.71	-5.95605	0.805726	1.4447e-13	6.28765e-12
NOSTRIN	158.063	-6.85627	0.927478	1.4423e-13	6.28765e-12
KATNAL2	149.528	-7.16401	0.969326	1.46049e-13	6.33769e-12
PADI1	110.824	-9.10818	1.23249	1.4673e-13	6.34857e-12
KLF7	444.011	-5.59924	0.757897	1.49216e-13	6.43725e-12
ECM2	132.109	-6.67016	0.90302	1.50746e-13	6.48429e-12
FAM171A1	322.966	-6.83167	0.925229	1.53885e-13	6.60007e-12
PAPPA	233.682	-6.34765	0.860403	1.6125e-13	6.88692e-12
TMEM53	152.814	-5.9286	0.803625	1.61507e-13	6.88692e-12
CPAMD8	166.071	-8.05718	1.09226	1.62341e-13	6.90255e-12
LRRC8E	182.673	-8.30732	1.12638	1.64019e-13	6.95384e-12
DMRT2	52.4287	-7.32955	0.993967	1.65541e-13	6.98303e-12
GALNT3	539.813	-7.20465	0.977092	1.66127e-13	6.98303e-12
NSUN7	60.5895	-6.79474	0.92146	1.65725e-13	6.98303e-12
SFN	791.714	-7.75003	1.05206	1.75169e-13	7.34216e-12
OR2A2	17.8073	-24.4351	3.3179	1.7767e-13	7.4259e-12
TMEM25	237.418	-6.62234	0.899341	1.79084e-13	7.46385e-12
LARGE2	55.9798	-7.41227	1.00667	1.79644e-13	7.4661e-12
IL20RB	184.094	-7.31768	0.993919	1.80569e-13	7.48345e-12
FBXO27	115.737	-7.75592	1.05379	1.8387e-13	7.59895e-12
TEAD3	208.027	-6.57354	0.893314	1.85845e-13	7.65911e-12
ID1	520.008	-6.54977	0.890177	1.86914e-13	7.68171e-12
RAB3C	89.8525	-8.16804	1.11018	1.87514e-13	7.68495e-12
PRSS12	154.09	-8.12112	1.10412	1.90567e-13	7.78844e-12
JADE3	203.557	-5.96309	0.810889	1.9269e-13	7.83181e-12
MEGF6	383.589	-7.00877	0.953068	1.92494e-13	7.83181e-12
SLC2A10	276.375	-7.22645	0.983804	2.0512e-13	8.31411e-12
ZNF433	86.752	-6.79862	0.926128	2.12157e-13	8.5758e-12
CDHR3	91.0137	-7.50456	1.02266	2.16324e-13	8.7081e-12
LNX1	132.137	-7.15258	0.974715	2.16611e-13	8.7081e-12
PLCD1	243.61	-6.43646	0.877336	2.1947e-13	8.79906e-12
SGK3	330.107	-6.02694	0.821645	2.21373e-13	8.85132e-12
ZDHHC1	88.9425	-5.96051	0.812998	2.27557e-13	9.074e-12
LRP2	80.0928	-6.95849	0.949787	2.36464e-13	9.40374e-12
NCK2	666.882	-6.52938	0.891285	2.37468e-13	9.41829e-12
SERTAD4	171.905	-6.76313	0.923616	2.43491e-13	9.63129e-12
P2RY1	755.258	-7.21191	0.985164	2.4701e-13	9.73443e-12
PBX1	959.622	-6.56458	0.896764	2.47419e-13	9.73443e-12
IFT70B	318.818	-6.8958	0.942661	2.56906e-13	1.00808e-11
ZNF502	182.981	-6.82656	0.933401	2.59997e-13	1.01751e-11
OR4F4	20.5232	-24.2629	3.31784	2.61522e-13	1.02076e-11
SEPTIN5	165.935	-6.27477	0.858239	2.64735e-13	1.03058e-11
ROBO3	247.432	-6.37692	0.872565	2.70646e-13	1.05082e-11
CYB561	310.94	-6.6566	0.910884	2.71462e-13	1.05122e-11
ATRNL1	67.1084	-7.71425	1.05606	2.77854e-13	1.07036e-11
SYBU	220.162	-6.72657	0.92081	2.77141e-13	1.07036e-11
TMEM8B	430.052	-5.87811	0.804742	2.78629e-13	1.07055e-11
EFNB1	420.108	-6.5895	0.902561	2.85873e-13	1.09269e-11
ZNF660	83.9985	-6.25786	0.857124	2.85646e-13	1.09269e-11
BBOF1	155.535	-7.02448	0.962258	2.87775e-13	1.09711e-11
CAPNS2	60.973	-7.34659	1.00654	2.90192e-13	1.10212e-11
CDC42BPG	293.349	-6.41601	0.879063	2.90583e-13	1.10212e-11
GPRASP3	122.4	-6.59591	0.904118	2.97747e-13	1.12352e-11
GPRC5B	372.109	-6.3178	0.865974	2.97325e-13	1.12352e-11
PGAP4	102.131	-7.81287	1.07105	2.9962e-13	1.1277e-11
H1-1	106.753	-6.72137	0.921636	3.03431e-13	1.13914e-11
TP73	100.953	-6.89071	0.945095	3.07615e-13	1.15192e-11
MROH6	66.078	-7.19002	0.986343	3.10925e-13	1.16137e-11
B3GNT3	235.446	-7.65232	1.05	3.14759e-13	1.17097e-11
GALNT18	299.411	-6.27065	0.860433	3.15083e-13	1.17097e-11
FZD1	368.109	-5.43296	0.745544	3.16352e-13	1.17273e-11
NREP	174.473	-6.92898	0.950942	3.1824e-13	1.17677e-11
PDE8B	54.8742	-7.19187	0.987385	3.24652e-13	1.19748e-11
STC1	143.078	-5.81492	0.798447	3.26993e-13	1.20311e-11
BTG1	2295.84	-6.55608	0.90072	3.37026e-13	1.23694e-11
B4GALT7	254.082	-5.71475	0.78532	3.414e-13	1.24988e-11
SCG2	120.144	-6.74997	0.928748	3.65361e-13	1.33429e-11
SLC16A5	98.7779	-6.60351	0.908959	3.73271e-13	1.35981e-11
DNAH7	138.982	-6.5364	0.899818	3.75444e-13	1.36436e-11
ADIRF	213.701	-6.5982	0.90838	3.76636e-13	1.36533e-11
KCNS3	253.632	-6.87765	0.947125	3.82536e-13	1.38332e-11
ASXL3	166.869	-6.48449	0.89357	3.96256e-13	1.42943e-11
MCU	585.218	-5.80907	0.800582	3.98535e-13	1.43414e-11
FAM110C	75.6544	-7.63747	1.05286	4.04656e-13	1.45263e-11
TUB	35.1041	-6.67931	0.921326	4.17802e-13	1.49618e-11
SCML1	260.242	-6.21467	0.857525	4.25433e-13	1.51981e-11
PCDHGB5	107.118	-5.78034	0.798006	4.37329e-13	1.55854e-11
FHIP1A	445.299	-6.82547	0.942505	4.42648e-13	1.57369e-11
ERMAP	315.707	-6.17494	0.852914	4.49307e-13	1.59204e-11
MYEOV	62.1227	-7.09284	0.979726	4.49967e-13	1.59204e-11
PCP4L1	110.765	-8.38236	1.15809	4.54976e-13	1.60208e-11
PI3	123.213	-8.38743	1.15878	4.54931e-13	1.60208e-11
CFAP57	50.4695	-7.5679	1.04573	4.5887e-13	1.60812e-11
DNALI1	96.7167	-6.83636	0.944605	4.57826e-13	1.60812e-11
ENTPD3	68.1035	-7.32411	1.01224	4.63605e-13	1.62086e-11
BMP3	182.218	-8.54231	1.18082	4.68198e-13	1.63022e-11
PARD6G	75.9404	-7.18396	0.993064	4.68492e-13	1.63022e-11
NME3	204.412	-6.686	0.924669	4.80542e-13	1.66822e-11
PPM1L	296.495	-5.89735	0.815667	4.82639e-13	1.67156e-11
LDOC1	46.167	-6.3568	0.879432	4.89074e-13	1.68988e-11
PRRG4	328.685	-6.59092	0.912195	4.9984e-13	1.72305e-11
CADM4	175.267	-6.28636	0.870341	5.09013e-13	1.75004e-11
NOX4	52.5481	-6.05231	0.837968	5.10043e-13	1.75004e-11
SNAI3	52.3896	-6.7076	0.929002	5.18999e-13	1.77664e-11
ECHDC3	39.6907	-6.11149	0.846708	5.27779e-13	1.79835e-11
PRR29	70.6492	-7.65703	1.06081	5.27304e-13	1.79835e-11
NCKAP5	283.378	-6.3289	0.876899	5.30054e-13	1.80194e-11
SNX7	238.449	-6.45764	0.895323	5.48821e-13	1.86145e-11
ACSS2	457.33	-5.316	0.73718	5.54308e-13	1.87575e-11
TGM5	77.2462	-7.87493	1.0926	5.69789e-13	1.92372e-11
EFEMP1	1661.27	-6.34653	0.880589	5.71396e-13	1.92474e-11
CTDSPL	195.182	-7.13702	0.990381	5.7478e-13	1.92931e-11
SMPD3	427.041	-6.65522	0.923542	5.75367e-13	1.92931e-11
TSPAN9	403.778	-6.14443	0.852913	5.84516e-13	1.95554e-11
DHRS9	551.862	-7.16194	0.994433	5.93212e-13	1.97674e-11
ZFP28	84.2533	-6.2534	0.868292	5.93531e-13	1.97674e-11
GALNT12	235.092	-6.94764	0.964867	5.99395e-13	1.99177e-11
THTPA	212.888	-5.57912	0.775324	6.20727e-13	2.05803e-11
GRAMD1C	185.115	-6.59275	0.91656	6.34163e-13	2.09786e-11
CHST9	133.972	-8.30998	1.15566	6.44612e-13	2.12765e-11
CCDC121	29.0242	-5.53635	0.770278	6.60026e-13	2.15918e-11
IGHV3-53	93.177	-6.77826	0.943025	6.5849e-13	2.15918e-11
SHF	26.3994	-5.96464	0.829834	6.58658e-13	2.15918e-11
SLC66A1	149.582	-6.02859	0.838799	6.61482e-13	2.15918e-11
XPR1	1275.79	-5.91674	0.823118	6.56479e-13	2.15918e-11
MOXD1	156.843	-6.50582	0.905316	6.65962e-13	2.16901e-11
CLDN1	676.609	-7.78104	1.08302	6.74189e-13	2.19097e-11
EML1	327.743	-7.17319	0.998536	6.7844e-13	2.19688e-11
RHBDF1	337.324	-6.91976	0.963272	6.78986e-13	2.19688e-11
OVGP1	48.2382	-5.83914	0.813067	6.88932e-13	2.22418e-11
RHOB	726.304	-6.61465	0.921323	6.99597e-13	2.25368e-11
EHD3	423.914	-5.87587	0.818488	7.02552e-13	2.25534e-11
SAT2	451.584	-5.59436	0.779287	7.03169e-13	2.25534e-11
PROSER2	65.3359	-6.41868	0.894152	7.04758e-13	2.25553e-11
RARB	284.159	-6.13737	0.855473	7.27091e-13	2.32197e-11
FDCSP	125.723	-8.44489	1.17728	7.32387e-13	2.33383e-11
MMP10	120.171	-8.07033	1.12512	7.34556e-13	2.3357e-11
PPM1J	64.712	-6.28788	0.876728	7.39183e-13	2.34536e-11
TESK2	172.151	-5.93093	0.827095	7.45625e-13	2.36072e-11
SLC34A2	92.789	-9.51411	1.32692	7.49614e-13	2.36827e-11
DSC3	879.918	-6.96966	0.972251	7.57768e-13	2.38891e-11
NRSN2	61.8741	-7.59794	1.06021	7.69854e-13	2.42184e-11
RAB19	51.557	-7.3359	1.0242	7.91769e-13	2.48548e-11
GAREM1	333.24	-5.93124	0.828524	8.13885e-13	2.54519e-11
SDR16C5	116.335	-7.51574	1.04987	8.14241e-13	2.54519e-11
ZNF181	292.475	-5.50548	0.769132	8.18353e-13	2.55264e-11
SDR42E1	179.247	-7.2108	1.00744	8.21299e-13	2.55642e-11
TMEM184B	745.564	-5.62753	0.786476	8.34479e-13	2.59198e-11
SUMF1	764.697	-6.83396	0.955421	8.50068e-13	2.63485e-11
DNAL4	66.2481	-5.97514	0.835519	8.58888e-13	2.65661e-11
ALDH1L1	156.119	-7.08003	0.990225	8.68262e-13	2.67999e-11
FSTL3	85.8184	-6.64148	0.92937	8.9201e-13	2.74754e-11
UGT8	61.5049	-7.25407	1.01589	9.29142e-13	2.85595e-11
SYDE2	92.6737	-6.9999	0.980589	9.43805e-13	2.89499e-11
CALHM5	112.519	-7.65468	1.07246	9.50356e-13	2.90903e-11
KLK5	74.6382	-9.38622	1.3152	9.5562e-13	2.91909e-11
UPK1B	65.1412	-8.24404	1.15534	9.63484e-13	2.93703e-11
BTBD8	246.546	-6.02641	0.844622	9.6757e-13	2.94341e-11
PDE9A	72.3656	-6.37737	0.893942	9.75044e-13	2.96004e-11
PRR4	51.3083	-8.10849	1.13671	9.7992e-13	2.96873e-11
SLC44A4	465.837	-7.36132	1.03203	9.82983e-13	2.97191e-11
LDAF1	216.614	-7.2346	1.01443	9.91218e-13	2.9785e-11
SWT1	317.982	-6.09872	0.855128	9.89718e-13	2.9785e-11
TSPO	557.16	-6.99065	0.98015	9.87586e-13	2.9785e-11
BST1	251.243	-6.53745	0.91697	1.0081e-12	2.99647e-11
F2RL1	135.724	-7.17764	1.00679	1.00932e-12	2.99647e-11
FOXG1	128.169	-8.15527	1.14377	1.00243e-12	2.99647e-11
IVL	82.4644	-8.42941	1.18219	1.00122e-12	2.99647e-11
PKHD1L1	168.828	-6.63817	0.931098	1.00807e-12	2.99647e-11
RSPH4A	81.8791	-7.32419	1.02735	1.00938e-12	2.99647e-11
TM7SF2	198.484	-5.96859	0.837516	1.02922e-12	3.04923e-11
SLITRK5	50.4858	-7.09713	0.996011	1.03664e-12	3.06505e-11
LYPD5	48.7037	-6.90276	0.969031	1.05328e-12	3.10802e-11
SNX22	98.4683	-5.98617	0.840998	1.09556e-12	3.22633e-11
CCDC113	130.315	-6.78577	0.953615	1.11238e-12	3.26934e-11
FAM83E	214.631	-7.04368	0.990214	1.13307e-12	3.32353e-11
BNIPL	91.4304	-7.05958	0.992495	1.13579e-12	3.32489e-11
IGLV2-23	277.275	-6.89774	0.970208	1.16422e-12	3.40136e-11
CBR3	309.65	-6.5478	0.921055	1.16868e-12	3.40766e-11
TSPAN6	175.753	-7.388	1.0395	1.18362e-12	3.4444e-11
SLC4A11	354.906	-6.39055	0.899241	1.18937e-12	3.45432e-11
LY6D	166.677	-8.83433	1.24342	1.20445e-12	3.49125e-11
IGKV3-11	563.676	-6.36368	0.895737	1.20841e-12	3.49586e-11
CLDN7	255.352	-7.28686	1.02615	1.23714e-12	3.56498e-11
CLUAP1	136.901	-6.35216	0.894499	1.23531e-12	3.56498e-11
CHMP1B	1797.47	-6.13636	0.864523	1.26601e-12	3.64108e-11
PTHLH	136.956	-6.608	0.931037	1.27065e-12	3.64731e-11
TRIM6	47.8138	-6.39156	0.9011	1.31178e-12	3.75805e-11
HYAL1	312.081	-7.30011	1.02929	1.3185e-12	3.76998e-11
MAOA	275.078	-6.70505	0.945485	1.32523e-12	3.78191e-11
CRABP1	46.802	-7.5171	1.06091	1.38518e-12	3.94536e-11
CNKSR1	92.5094	-6.65414	0.93928	1.39756e-12	3.97024e-11
PLEKHA7	544.984	-6.13443	0.865968	1.40156e-12	3.97024e-11
ZNF704	302.875	-6.1413	0.866943	1.40199e-12	3.97024e-11
CARD14	54.0236	-7.00597	0.989285	1.42238e-12	4.02027e-11
SGCD	54.9075	-7.41028	1.04666	1.4424e-12	4.06905e-11
CACNA1A	41.2138	-5.46212	0.771938	1.48534e-12	4.17822e-11
ECSCR	295.967	-6.20768	0.877321	1.48676e-12	4.17822e-11
FRAT2	197.254	-6.79846	0.961086	1.50824e-12	4.23052e-11
PCDHGB4	101.347	-6.75625	0.955325	1.52491e-12	4.26916e-11
PRKAA2	67.6872	-6.98472	0.988133	1.56503e-12	4.37321e-11
CXCL1	242.119	-6.9046	0.977247	1.60195e-12	4.46789e-11
NHSL3	974.409	-6.63578	0.939937	1.66726e-12	4.64128e-11
TMEM179B	340.096	-5.45191	0.772389	1.6831e-12	4.67655e-11
PEX7	151.7	-6.25427	0.886306	1.70669e-12	4.73318e-11
BOK	50.7343	-7.31554	1.03689	1.72257e-12	4.76825e-11
LRP11	317.397	-6.19886	0.879039	1.7654e-12	4.87767e-11
ZNF583	79.7371	-6.55328	0.929379	1.77328e-12	4.89028e-11
AMY2B	275.524	-5.63337	0.798974	1.77947e-12	4.8982e-11
ASS1	1059.76	-6.88443	0.9767	1.80651e-12	4.96335e-11
BAIAP2	407.506	-6.64332	0.942636	1.82033e-12	4.98357e-11
C11orf68	445.397	-5.84834	0.829837	1.82062e-12	4.98357e-11
FOXJ1	656.716	-8.71912	1.23742	1.83828e-12	5.00886e-11
MIR100HG	63.8425	-6.27949	0.891191	1.83904e-12	5.00886e-11
TRIM3	208.958	-5.17126	0.733919	1.84005e-12	5.00886e-11
KCNMB3	87.3596	-5.56559	0.789944	1.84721e-12	5.01911e-11
SPIN3	129.165	-5.32877	0.756456	1.8628e-12	5.05216e-11
ANKRD31	114.161	-6.36875	0.904532	1.90949e-12	5.15981e-11
TTC9	232.647	-6.59249	0.936301	1.90876e-12	5.15981e-11
KLRB1	128.238	-7.18247	1.02049	1.94679e-12	5.25099e-11
MFAP3L	94.4192	-6.98764	0.992863	1.95208e-12	5.25567e-11
MYOM1	65.3448	-5.37653	0.764077	1.96948e-12	5.29286e-11
ZNF627	290.972	-5.743	0.816848	2.05523e-12	5.51326e-11
MYOM3	43.1416	-6.87718	0.978464	2.08695e-12	5.58819e-11
PAK3	135.14	-6.1249	0.871588	2.10579e-12	5.62841e-11
BCL6B	167.861	-6.61021	0.940878	2.13175e-12	5.68749e-11
TIGD5	167.318	-6.23663	0.88778	2.14109e-12	5.70209e-11
CCL13	73.0571	-7.25791	1.03326	2.15147e-12	5.71941e-11
PTK7	1205.91	-6.25442	0.890691	2.18741e-12	5.8045e-11
CRNN	391.462	-10.6256	1.51422	2.26372e-12	5.99622e-11
CHIC2	218.673	-5.31362	0.757808	2.35224e-12	6.20839e-11
LRATD1	228.248	-7.14558	1.01905	2.34959e-12	6.20839e-11
OAT	1325.17	-6.19094	0.883834	2.47611e-12	6.51357e-11
SPINT1	770.96	-7.0755	1.01012	2.47669e-12	6.51357e-11
DCHS2	64.0812	-6.80413	0.971514	2.49406e-12	6.54758e-11
TRPM3	85.482	-6.57933	0.940173	2.59638e-12	6.80409e-11
CARMIL1	495.303	-5.9977	0.8572	2.61784e-12	6.84815e-11
RAP1GAP	87.6351	-6.54801	0.936234	2.67172e-12	6.97672e-11
PIEZO2	108.629	-5.66282	0.809731	2.68189e-12	6.99093e-11
CYP24A1	86.2494	-8.07053	1.15479	2.77336e-12	7.2166e-11
ZSCAN5A	99.8451	-5.67712	0.812625	2.82535e-12	7.33893e-11
IGLV1-47	160.51	-6.74821	0.966012	2.83569e-12	7.35287e-11
IGHV3-11	234.966	-5.87505	0.841117	2.85216e-12	7.3826e-11
CBX7	523.247	-5.73546	0.821231	2.86946e-12	7.41436e-11
CD151	1387.68	-5.21352	0.746772	2.9223e-12	7.52454e-11
PRKG1	194.463	-6.16587	0.883157	2.91798e-12	7.52454e-11
EPHB2	686.229	-6.05769	0.867841	2.94781e-12	7.57701e-11
ZNF711	113.024	-6.05754	0.867864	2.95528e-12	7.58298e-11
SLC15A2	194.303	-6.37102	0.913109	3.00954e-12	7.69546e-11
SPINT2	1289.84	-7.07634	1.01417	3.00606e-12	7.69546e-11
PWWP2B	278.071	-5.95363	0.853409	3.03071e-12	7.73618e-11
TENT5B	58.2502	-7.648	1.09684	3.10737e-12	7.91816e-11
LGR6	93.4866	-6.02291	0.86402	3.15153e-12	8.01685e-11
IGKV4-1	1578.18	-7.12315	1.02234	3.22621e-12	8.17861e-11
RASSF7	186.365	-6.04108	0.867008	3.22095e-12	8.17861e-11
CHRNE	59.0275	-6.0073	0.862383	3.26237e-12	8.24195e-11
SLC14A1	139.189	-5.91	0.848396	3.25884e-12	8.24195e-11
CYP2J2	110.871	-6.36179	0.913783	3.35381e-12	8.44908e-11
PCDH10	110.375	-8.8074	1.26508	3.35581e-12	8.44908e-11
PDGFC	334.711	-5.74848	0.825992	3.41535e-12	8.58434e-11
GPC4	99.2805	-6.69679	0.962638	3.48329e-12	8.74021e-11
HECTD2	220.591	-6.02467	0.866334	3.54522e-12	8.8805e-11
CFAP45	44.8683	-6.13417	0.882398	3.60904e-12	9.02505e-11
GSDMC	118.095	-6.25674	0.900093	3.62142e-12	9.04067e-11
CFD	230.483	-5.59636	0.805293	3.6665e-12	9.13777e-11
CASKIN2	269.637	-5.95536	0.857019	3.6808e-12	9.15792e-11
SOX13	304.806	-6.31546	0.909223	3.75807e-12	9.33358e-11
SPRR1A	109.339	-10.2711	1.47877	3.76507e-12	9.33358e-11
TMEM150A	78.532	-6.21285	0.894511	3.77038e-12	9.33358e-11
LTB4R2	175.183	-5.79432	0.834568	3.84124e-12	9.49306e-11
S100A13	778.31	-6.70733	0.966181	3.8631e-12	9.53112e-11
IGKV1D-13	58.9386	-7.52384	1.08387	3.87624e-12	9.54758e-11
SERAC1	144.423	-5.38523	0.776016	3.93258e-12	9.67021e-11
CAND2	76.4083	-6.23091	0.898	3.95857e-12	9.71791e-11
MAP7	613.71	-6.1193	0.882141	4.00865e-12	9.82453e-11
TM6SF1	81.7409	-6.27346	0.904674	4.07646e-12	9.97413e-11
IGKV1-17	113.575	-6.78473	0.979028	4.20647e-12	1.02752e-10
PCDHGA9	96.5012	-6.56838	0.948212	4.29482e-12	1.04737e-10
MT1X	222.177	-6.62084	0.956155	4.37699e-12	1.06565e-10
ANXA3	229.712	-6.41026	0.925963	4.42798e-12	1.07099e-10
CAB39L	261.657	-6.30917	0.911337	4.42242e-12	1.07099e-10
LOXL3	421.248	-5.54942	0.801589	4.42092e-12	1.07099e-10
YPEL4	44.5343	-6.11574	0.883419	4.42771e-12	1.07099e-10
CLCA4	234.221	-7.75641	1.12054	4.452e-12	1.07504e-10
BHLHA15	111.629	-6.88774	0.995153	4.47553e-12	1.07895e-10
ANGPT1	195.938	-6.00647	0.868019	4.5247e-12	1.08903e-10
GNAL	126.092	-7.09023	1.02517	4.64179e-12	1.11539e-10
SOX2	130.307	-7.89768	1.14198	4.65368e-12	1.11643e-10
ARMH4	153.641	-5.84083	0.844769	4.70788e-12	1.1276e-10
BMP6	81.071	-5.7385	0.830086	4.74029e-12	1.13352e-10
NRIP1	2086.41	-5.84633	0.84574	4.75584e-12	1.1354e-10
CAPS2	29.2278	-5.51711	0.798281	4.80422e-12	1.14349e-10
CCDC149	237.998	-5.73133	0.82928	4.80524e-12	1.14349e-10
CBR3-AS1	57.1561	-6.0858	0.880789	4.86404e-12	1.15562e-10
WNT4	37.9292	-7.22175	1.04564	4.96542e-12	1.17781e-10
PC	233.012	-6.00883	0.870223	5.02266e-12	1.18948e-10
TTC21A	50.9398	-5.72515	0.829199	5.04021e-12	1.19172e-10
C11orf71	101.735	-7.4855	1.08486	5.20213e-12	1.22804e-10
CLCA2	808.475	-8.47015	1.22762	5.2126e-12	1.22854e-10
ENPP3	35.2005	-6.68336	0.968897	5.27765e-12	1.24134e-10
SLC27A1	474.25	-6.24828	0.905874	5.29213e-12	1.24134e-10
THSD1	90.8324	-5.78812	0.83914	5.28599e-12	1.24134e-10
IGKV3-15	207.238	-7.50419	1.08837	5.39155e-12	1.26265e-10
CD226	578.14	-6.4473	0.935328	5.45948e-12	1.27653e-10
USP2	45.9465	-6.94178	1.00712	5.47375e-12	1.27784e-10
NKD1	104.073	-6.01839	0.873218	5.49366e-12	1.28046e-10
IGLV3-1	281.813	-6.91982	1.00408	5.51314e-12	1.28298e-10
NME4	178.926	-6.50122	0.94347	5.54949e-12	1.2894e-10
CFAP54	63.9543	-5.81924	0.844804	5.64766e-12	1.31015e-10
PLCH2	321.011	-5.87582	0.853146	5.68878e-12	1.31762e-10
DMRTA1	44.1934	-7.22123	1.04877	5.76126e-12	1.33231e-10
SBF2-AS1	45.0843	-6.18852	0.899057	5.84621e-12	1.34984e-10
GLCE	672.883	-5.6043	0.814588	5.9886e-12	1.38056e-10
ILDR1	138.032	-6.06445	0.88168	6.05725e-12	1.39421e-10
CCDC9B	158.093	-5.37927	0.782332	6.15832e-12	1.41526e-10
MATN2	216.455	-6.19752	0.901549	6.22944e-12	1.42938e-10
HP	218.621	-6.87206	0.999838	6.27879e-12	1.43847e-10
IGLV3-25	103.857	-7.18372	1.04522	6.28954e-12	1.43869e-10
ZNF625-ZNF20	82.1364	-5.28763	0.769423	6.32163e-12	1.4438e-10
LZTS3	284.387	-6.40525	0.93237	6.42648e-12	1.46548e-10
CCDC126	163.406	-6.33882	0.922828	6.46944e-12	1.473e-10
CLDN23	167.105	-6.6593	0.969571	6.49754e-12	1.47711e-10
MIA	37.3872	-7.07392	1.03045	6.65465e-12	1.5105e-10
SEZ6L2	137.653	-6.1946	0.902422	6.67635e-12	1.5131e-10
SAA2	256.146	-7.40349	1.07859	6.69346e-12	1.51465e-10
HEBP2	583.374	-6.04965	0.881407	6.71328e-12	1.51681e-10
CLDN5	122.311	-6.61562	0.964356	6.87884e-12	1.55184e-10
EPCAM	183.756	-6.85969	1.00039	7.02971e-12	1.58346e-10
F2RL2	61.4372	-5.84664	0.852762	7.07528e-12	1.59129e-10
ASPRV1	64.7041	-7.86397	1.14711	7.10725e-12	1.59605e-10
RPTN	131.345	-9.43284	1.37611	7.14659e-12	1.60244e-10
JDP2	292.759	-5.73693	0.837064	7.19986e-12	1.61194e-10
CALCRL	361.512	-6.4514	0.941562	7.2925e-12	1.6302e-10
TYRO3	98.1963	-6.72505	0.981568	7.31647e-12	1.63309e-10
NRG1	165.636	-6.88273	1.00493	7.43714e-12	1.65752e-10
CCNJL	66.9567	-6.53223	0.953821	7.4634e-12	1.65836e-10
PRSS27	50.9083	-6.27698	0.916537	7.4581e-12	1.65836e-10
IQCD	29.3622	-5.5895	0.81626	7.50458e-12	1.665e-10
FAM174A	148.208	-6.42421	0.938337	7.57389e-12	1.67786e-10
SOWAHB	69.7636	-8.0626	1.17802	7.69132e-12	1.70131e-10
GC	22.0633	-22.6899	3.3178	7.98446e-12	1.76351e-10
DRC3	45.6231	-6.65523	0.973185	7.99649e-12	1.76353e-10
NAV2	433.226	-5.47461	0.800909	8.17219e-12	1.79959e-10
ZNF471	65.6009	-5.66798	0.829253	8.19797e-12	1.80258e-10
YIPF2	545.232	-6.01902	0.880665	8.22163e-12	1.80509e-10
OSCP1	30.3611	-6.13118	0.897627	8.46548e-12	1.85586e-10
COBLL1	831.886	-5.87677	0.860416	8.48299e-12	1.85694e-10
H19	150.11	-6.87564	1.00689	8.57683e-12	1.87423e-10
WNT5B	73.462	-7.40599	1.08459	8.58735e-12	1.87423e-10
KRTCAP3	47.7701	-6.5036	0.952645	8.67756e-12	1.89112e-10
RNF152	403.06	-5.73191	0.839638	8.69227e-12	1.89153e-10
ZNF414	170.922	-5.77778	0.84681	8.91581e-12	1.93732e-10
GJA5	99.6873	-6.83455	1.00195	9.02699e-12	1.95859e-10
MDFI	44.1139	-7.11408	1.04297	9.04068e-12	1.95868e-10
ADAMTS18	29.5396	-6.05624	0.888171	9.18151e-12	1.98627e-10
CECR2	61.2809	-6.61183	0.96984	9.26763e-12	2.00197e-10
EGLN3	326.826	-6.11222	0.896895	9.43519e-12	2.03519e-10
ESRRG	67.9118	-7.55339	1.10853	9.50001e-12	2.04546e-10
PEAK3	26.8596	-5.60736	0.822951	9.51055e-12	2.04546e-10
INAVA	440.645	-6.46803	0.949395	9.57238e-12	2.05576e-10
SSPN	82.5869	-4.95902	0.728452	9.92372e-12	2.12812e-10
C15orf62	41.9234	-7.03995	1.03438	1.00389e-11	2.1497e-10
USP53	1113.4	-5.13117	0.754187	1.02054e-11	2.18217e-10
PLA2G4F	40.9418	-8.00417	1.17653	1.02312e-11	2.18454e-10
ZNF629	515.006	-6.14886	0.903929	1.02913e-11	2.1942e-10
COL6A6	66.9665	-7.24187	1.06512	1.05253e-11	2.2376e-10
ORAI3	267.003	-6.423	0.944672	1.05215e-11	2.2376e-10
HLF	130.684	-6.95663	1.02356	1.07163e-11	2.27494e-10
IGHV4-59	81.4155	-6.52544	0.960232	1.07793e-11	2.28175e-10
TMIGD3	25.6833	-5.91972	0.871078	1.07674e-11	2.28175e-10
NUDT14	156.964	-5.71669	0.841355	1.08593e-11	2.29538e-10
MTURN	144.307	-5.59899	0.824258	1.10008e-11	2.32198e-10
OPN3	168.459	-6.72943	0.990978	1.11593e-11	2.35206e-10
GPAT3	166.312	-5.83194	0.859198	1.13973e-11	2.39881e-10
IGHV2-5	169.337	-6.71701	0.989694	1.14519e-11	2.40686e-10
CFAP43	47.4939	-6.36508	0.937963	1.15226e-11	2.41828e-10
ARMC2	76.1104	-5.31605	0.78373	1.17698e-11	2.46665e-10
PHYHD1	65.9088	-6.2482	0.921269	1.1839e-11	2.47762e-10
SLC5A8	54.0523	-8.97441	1.32344	1.1924e-11	2.49187e-10
ALKBH7	140.102	-6.74201	0.994314	1.19703e-11	2.49803e-10
ASAP3	441.148	-5.20927	0.768384	1.20579e-11	2.50886e-10
OCEL1	70.5838	-5.50628	0.812216	1.20733e-11	2.50886e-10
SLC25A4	286.142	-6.48111	0.955959	1.20428e-11	2.50886e-10
EIF4EBP1	203.494	-6.33481	0.934618	1.21876e-11	2.52906e-10
CBY1	93.3582	-5.32559	0.786296	1.26125e-11	2.61355e-10
CELSR2	813.555	-6.05738	0.894847	1.29514e-11	2.67823e-10
FAM210B	401.663	-5.93064	0.876137	1.29609e-11	2.67823e-10
APOLD1	191.79	-5.46778	0.807793	1.2987e-11	2.67987e-10
SLC7A2	239.423	-6.64115	0.981785	1.33899e-11	2.75915e-10
ANKRD42	203.531	-5.05017	0.74676	1.35377e-11	2.78571e-10
FAM114A1	1203.82	-6.01761	0.889954	1.36373e-11	2.80229e-10
VMAC	120.923	-5.84661	0.864745	1.36973e-11	2.81071e-10
DMRTA2	119.181	-7.92786	1.17267	1.37519e-11	2.818e-10
LRRC51	49.5246	-6.45263	0.954699	1.39131e-11	2.84707e-10
GAL3ST4	219.261	-5.82666	0.862158	1.39686e-11	2.85446e-10
DHRS12	150.324	-5.77408	0.854581	1.41248e-11	2.87842e-10
IGHV3-15	342.873	-6.17085	0.913304	1.41243e-11	2.87842e-10
ARL4A	317.246	-6.57412	0.973071	1.41801e-11	2.8857e-10
C1orf198	313.723	-6.04901	0.895413	1.42291e-11	2.89168e-10
PDE3A	150.275	-5.97871	0.885357	1.44934e-11	2.94134e-10
PHYH	94.7195	-5.9486	0.88115	1.46881e-11	2.97676e-10
CYB5D2	521.06	-6.37371	0.944629	1.50602e-11	3.04799e-10
TLCD5	42.4789	-7.00837	1.0392	1.54072e-11	3.10968e-10
VANGL2	121.95	-5.67687	0.84175	1.53955e-11	3.10968e-10
VSNL1	46.2024	-7.74151	1.14812	1.55402e-11	3.13224e-10
PEX11A	65.5592	-6.46346	0.958609	1.5564e-11	3.13275e-10
OAF	301.78	-5.92037	0.878295	1.57571e-11	3.1673e-10
FSCN1	710.118	-6.28443	0.93241	1.58405e-11	3.17159e-10
LRFN5	39.5798	-6.82466	1.01257	1.58429e-11	3.17159e-10
LRP4	174.616	-6.28257	0.932089	1.58053e-11	3.17159e-10
CLDN11	49.3034	-6.49819	0.96448	1.61136e-11	3.22141e-10
RAG1	96.284	-6.13739	0.911081	1.62382e-11	3.24193e-10
IGKV1-5	763.079	-6.5149	0.967398	1.64541e-11	3.28059e-10
P3H3	254.964	-6.11996	0.908895	1.65745e-11	3.30013e-10
CACFD1	39.732	-6.96361	1.03463	1.69025e-11	3.3609e-10
FOXQ1	134.868	-6.44977	0.958564	1.71332e-11	3.40219e-10
ADGRG6	571.64	-6.18944	0.920178	1.73969e-11	3.44992e-10
COL28A1	27.8527	-6.47274	0.962739	1.77714e-11	3.51946e-10
IRX5	72.4779	-6.84046	1.01778	1.8056e-11	3.57103e-10
ST3GAL4	363.131	-5.30487	0.789394	1.81504e-11	3.58488e-10
ADORA3	51.8763	-7.22256	1.07481	1.81908e-11	3.58805e-10
LRRC1	329.83	-6.01906	0.895842	1.83127e-11	3.60729e-10
HAVCR1	68.6817	-6.13798	0.91391	1.86553e-11	3.66987e-10
IGLV6-57	126.46	-7.17441	1.06885	1.91575e-11	3.76365e-10
SRCIN1	35.3964	-6.32363	0.942471	1.95119e-11	3.81802e-10
TRPV4	199.911	-5.90711	0.880391	1.95094e-11	3.81802e-10
ZNF658	315.942	-5.97289	0.890145	1.94602e-11	3.81802e-10
INKA2	282.454	-5.54662	0.826884	1.97505e-11	3.85958e-10
PDZD4	63.3646	-6.51454	0.971264	1.98282e-11	3.86966e-10
FGFRL1	125.122	-5.36064	0.799358	1.99793e-11	3.88372e-10
TOM1L1	110.172	-6.44858	0.961547	1.99399e-11	3.88372e-10
TTLL7	157.627	-5.74092	0.856063	1.99764e-11	3.88372e-10
HES2	49.824	-7.2163	1.07631	2.01867e-11	3.91391e-10
ITPRID1	85.4689	-7.74606	1.15532	2.01876e-11	3.91391e-10
SPTLC3	202.975	-5.58094	0.832503	2.03056e-11	3.93161e-10
PLPP3	857.482	-5.98521	0.892962	2.04675e-11	3.95777e-10
RAB7B	77.2244	-5.16612	0.770936	2.06846e-11	3.9945e-10
INPP5J	119.625	-6.68595	0.998444	2.13661e-11	4.12072e-10
HSPA4L	277.496	-6.52658	0.974753	2.14745e-11	4.13083e-10
SPATA18	47.1392	-6.47409	0.9669	2.14608e-11	4.13083e-10
GUSBP9	74.9923	-5.45866	0.81534	2.15746e-11	4.14468e-10
HR	247.117	-6.23842	0.931987	2.17634e-11	4.17551e-10
MYCL	162.863	-5.68378	0.84917	2.18135e-11	4.17969e-10
AKTIP	427.03	-5.13413	0.768049	2.31495e-11	4.42812e-10
FOXA1	195.478	-7.60792	1.13814	2.317e-11	4.42812e-10
TRO	126.256	-6.16784	0.922829	2.33104e-11	4.44918e-10
OLFML3	374.697	-6.13632	0.918333	2.3567e-11	4.49234e-10
PLCE1	322.858	-5.52982	0.827737	2.37883e-11	4.52868e-10
SERPINB7	28.6461	-7.76921	1.16324	2.40649e-11	4.57544e-10
MINAR1	41.8416	-6.48371	0.97102	2.43528e-11	4.62422e-10
CTAGE4	63.2935	-6.82954	1.02301	2.45709e-11	4.65478e-10
IGHV4-61	88.2684	-5.90539	0.884587	2.45769e-11	4.65478e-10
FGFBP1	188.119	-8.65857	1.29725	2.48016e-11	4.69132e-10
PODXL2	77.6389	-6.38113	0.956856	2.57814e-11	4.87041e-10
LAPTM4B	319.761	-6.81843	1.02268	2.60659e-11	4.91785e-10
OR52N1	39.4774	-11.3988	1.70981	2.61671e-11	4.93065e-10
ZNF596	109.114	-6.08046	0.912325	2.65039e-11	4.98774e-10
PCGF2	116.073	-5.40555	0.811121	2.65941e-11	4.99833e-10
MAP2	123.42	-4.77617	0.716865	2.6905e-11	5.05033e-10
PITX1	63.5368	-7.47144	1.12164	2.71635e-11	5.09238e-10
CRISPLD1	41.4629	-7.02055	1.05422	2.74809e-11	5.14535e-10
ACOX2	99.4883	-6.33304	0.951699	2.84349e-11	5.31721e-10
CPNE5	197.945	-5.75297	0.864768	2.87921e-11	5.37164e-10
PSEN2	336.04	-5.47229	0.822581	2.87987e-11	5.37164e-10
BSCL2	166.888	-5.88245	0.88436	2.89828e-11	5.39914e-10
PRELID2	100.767	-6.30093	0.947803	2.97231e-11	5.53007e-10
DHH	50.0411	-6.5494	0.98539	3.00137e-11	5.57711e-10
SPRR3	173.3	-9.99943	1.50475	3.027e-11	5.61765e-10
H1-0	1023.5	-5.53202	0.832643	3.05447e-11	5.66152e-10
IGLV3-9	72.193	-6.72144	1.01219	3.12577e-11	5.78641e-10
IGLV7-43	54.4088	-6.59406	0.99328	3.16515e-11	5.85195e-10
IGKV3-20	1117.42	-6.65085	1.00213	3.20692e-11	5.91453e-10
IQCK	183.593	-6.38001	0.961316	3.20701e-11	5.91453e-10
SHISA4	59.3931	-5.76918	0.869489	3.24205e-11	5.97169e-10
C19orf33	145.468	-6.84092	1.03134	3.28902e-11	6.05064e-10
IFT70A	69.8499	-5.87543	0.885839	3.2979e-11	6.05942e-10
EPHX2	194.401	-6.08912	0.918619	3.38966e-11	6.22028e-10
MMP11	52.3995	-7.33029	1.10624	3.44149e-11	6.30754e-10
CCM2L	77.0314	-5.57097	0.840977	3.48666e-11	6.38241e-10
PLPP5	623.272	-5.47834	0.827159	3.51781e-11	6.43145e-10
ZBBX	28.912	-8.03582	1.21369	3.56834e-11	6.51575e-10
PLPPR2	223.289	-5.10823	0.771804	3.62724e-11	6.61511e-10
ZNF778	380.82	-5.14146	0.777239	3.71479e-11	6.76643e-10
FAM131A	152.286	-6.14292	0.928876	3.75896e-11	6.83843e-10
EFHB	54.888	-7.23297	1.09375	3.76642e-11	6.84356e-10
TMEM91	94.3392	-5.27967	0.798493	3.79044e-11	6.87873e-10
CCNB3	38.6389	-6.21963	0.941029	3.8589e-11	6.99437e-10
MYCT1	112.416	-6.51244	0.985464	3.88212e-11	7.02782e-10
ALDH7A1	550.466	-5.73843	0.868593	3.9331e-11	7.11139e-10
ELN	165.568	-6.57788	0.995985	3.99145e-11	7.20805e-10
NEK10	41.3577	-5.64976	0.855513	4.00353e-11	7.22104e-10
MUC15	136.682	-7.03675	1.06558	4.01021e-11	7.22426e-10
GPRASP2	90.8325	-5.6549	0.856431	4.03283e-11	7.25615e-10
SLITRK6	188.303	-6.73815	1.02186	4.28066e-11	7.69267e-10
TMEM200B	61.2587	-6.77958	1.02828	4.30723e-11	7.72852e-10
ZNF215	66.4525	-5.36742	0.814113	4.31108e-11	7.72852e-10
AGA	148.126	-5.6643	0.859268	4.33942e-11	7.76987e-10
ACKR4	57.8503	-6.55279	0.994399	4.4074e-11	7.88203e-10
IFT81	115.987	-4.73276	0.718408	4.4628e-11	7.97145e-10
ACVR1C	59.8285	-7.31019	1.1105	4.61702e-11	8.23694e-10
KPNA5	517.124	-5.36175	0.814629	4.6469e-11	8.28024e-10
PCDHB5	42.6747	-6.82708	1.03737	4.66887e-11	8.30935e-10
TMEM200C	51.1861	-6.45908	0.981647	4.70968e-11	8.37188e-10
RNASE4	63.7862	-5.55856	0.844819	4.71775e-11	8.37614e-10
SMIM27	106.903	-5.74925	0.874435	4.87114e-11	8.63808e-10
FUT6	171.145	-7.65877	1.1651	4.91539e-11	8.70607e-10
CD300C	129.941	-6.0889	0.92643	4.9497e-11	8.75634e-10
GRIP2	97.0736	-5.76708	0.877777	5.02817e-11	8.8845e-10
ACER2	35.6308	-6.79744	1.03485	5.08106e-11	8.95941e-10
MYRIP	90.7629	-5.63463	0.857827	5.08271e-11	8.95941e-10
STEAP4	538.668	-5.34915	0.814403	5.09313e-11	8.96707e-10
NRBP2	133.823	-5.39161	0.82092	5.10765e-11	8.98192e-10
IGHV4-31	36.6952	-6.56958	1.00073	5.20998e-11	9.15097e-10
RUSC2	1075.46	-5.52653	0.842242	5.32025e-11	9.33354e-10
SPRR2E	165.74	-10.7648	1.64228	5.572e-11	9.76358e-10
ZNF32	269.718	-5.34479	0.815477	5.5946e-11	9.79155e-10
ZNF665	94.7039	-5.7037	0.870278	5.60575e-11	9.79944e-10
RP1	48.4478	-7.23362	1.10378	5.62057e-11	9.81371e-10
TCIM	494.378	-5.71485	0.872502	5.75563e-11	1.00377e-09
TENM2	324.926	-6.10866	0.932896	5.82891e-11	1.01535e-09
CROCC2	42.508	-6.83797	1.04432	5.83956e-11	1.016e-09
ASRGL1	191.612	-6.03339	0.921472	5.84864e-11	1.01638e-09
CYP2E1	64.3872	-6.02559	0.920382	5.8769e-11	1.01889e-09
RASA4B	250.897	-4.93534	0.753835	5.87118e-11	1.01889e-09
RND1	102.476	-5.73269	0.876009	5.9854e-11	1.03649e-09
C1orf115	82.9224	-6.16409	0.942261	6.07797e-11	1.0476e-09
PCDHGA8	45.0613	-6.15387	0.940689	6.07528e-11	1.0476e-09
RAB34	558.652	-5.63708	0.861666	6.06716e-11	1.0476e-09
RAPGEF4	85.9542	-5.6673	0.86628	6.06559e-11	1.0476e-09
GAS2	47.3084	-7.0316	1.07496	6.10077e-11	1.04908e-09
SMIM14	801.106	-5.92816	0.906255	6.09537e-11	1.04908e-09
CAMK1D	526.426	-5.22273	0.798539	6.13729e-11	1.0529e-09
SEMA6D	73.3923	-5.55113	0.848741	6.13443e-11	1.0529e-09
CACNB3	117.721	-5.27951	0.807406	6.1991e-11	1.06148e-09
GJA1	606.103	-5.77878	0.883786	6.20695e-11	1.06148e-09
RGS4	62.7207	-7.2771	1.11294	6.20888e-11	1.06148e-09
OPRL1	61.9108	-6.10225	0.933533	6.28795e-11	1.07339e-09
ZNF487	76.4064	-5.2181	0.798289	6.29307e-11	1.07339e-09
CHL1	603.04	-6.54936	1.0024	6.41697e-11	1.09326e-09
ZNF329	228.004	-5.11801	0.783527	6.48947e-11	1.10433e-09
TTC23	274.127	-5.46627	0.837075	6.56834e-11	1.11647e-09
TMEM144	201.799	-5.65047	0.865525	6.64893e-11	1.12886e-09
SPRR1B	454.825	-8.00651	1.22648	6.66456e-11	1.13022e-09
CLXN	108.179	-8.07963	1.23781	6.69348e-11	1.13382e-09
CCNO	58.8717	-7.75587	1.18834	6.726e-11	1.13802e-09
KREMEN1	675.716	-5.84291	0.895425	6.78681e-11	1.14573e-09
RSPH1	44.8267	-6.86863	1.05262	6.78709e-11	1.14573e-09
LIMS2	80.5843	-5.45245	0.835631	6.80245e-11	1.14701e-09
ZNF699	368.35	-4.91773	0.753708	6.81347e-11	1.14756e-09
HDC	67.4246	-6.15612	0.943534	6.82129e-11	1.14756e-09
PLEK2	40.1272	-7.18783	1.10177	6.84937e-11	1.15098e-09
PPM1H	202.013	-6.44122	0.987494	6.90105e-11	1.15834e-09
DBP	418.075	-5.51449	0.84551	6.93367e-11	1.16249e-09
PHLDB3	252.652	-5.47837	0.840565	7.14954e-11	1.19732e-09
LURAP1L	53.8836	-6.37894	0.978782	7.16214e-11	1.19807e-09
AP1M2	253.625	-6.50471	0.998154	7.18514e-11	1.1992e-09
ENKD1	37.4138	-5.45359	0.836849	7.18145e-11	1.1992e-09
SGCE	153.197	-5.5563	0.852923	7.29694e-11	1.21649e-09
CYP4F3	92.854	-6.8706	1.05471	7.30832e-11	1.21701e-09
VSTM4	120.01	-5.63803	0.8656	7.34491e-11	1.22172e-09
NELL2	449.409	-5.22584	0.802357	7.36133e-11	1.22307e-09
CDKN1C	79.6952	-6.2793	0.964152	7.37787e-11	1.22444e-09
THSD4	263.064	-6.28697	0.965366	7.38971e-11	1.22503e-09
PRICKLE1	353.797	-5.67667	0.87168	7.39942e-11	1.22526e-09
EIF2AK4	1102.94	-4.35304	0.668472	7.4192e-11	1.22716e-09
CCDC24	74.812	-6.32215	0.971285	7.56246e-11	1.24946e-09
FAM106A	111.708	-5.10403	0.784164	7.57144e-11	1.24954e-09
RHOV	36.3575	-7.0222	1.07928	7.69918e-11	1.2692e-09
CFAP61	40.4075	-7.16647	1.10234	7.97013e-11	1.31094e-09
CYP4B1	269.31	-7.18347	1.10494	7.96593e-11	1.31094e-09
ZDHHC23	109.998	-5.46658	0.84108	8.06005e-11	1.32425e-09
PLEKHH2	166.726	-5.81784	0.89515	8.07004e-11	1.32442e-09
CEL	52.1362	-6.25958	0.963347	8.15337e-11	1.33661e-09
BBS1	205.304	-5.02899	0.77456	8.43089e-11	1.37904e-09
COL4A6	101.39	-6.63421	1.02179	8.42937e-11	1.37904e-09
SNTA1	99.3892	-6.12486	0.943439	8.46711e-11	1.38343e-09
IGKV1-6	37.4469	-6.9682	1.07403	8.70411e-11	1.42058e-09
IGLV4-69	54.8881	-7.06421	1.08919	8.83025e-11	1.43957e-09
TGM3	97.5664	-9.06662	1.39841	8.96047e-11	1.45919e-09
GPT2	419.108	-6.02051	0.928721	9.01629e-11	1.46666e-09
CUTA	949.206	-5.89078	0.908772	9.04394e-11	1.46954e-09
CAPS	156.104	-5.43793	0.839411	9.2776e-11	1.50585e-09
RCBTB2	306.624	-5.39516	0.832973	9.35733e-11	1.51712e-09
CD109	422.749	-5.75788	0.889065	9.39794e-11	1.52203e-09
FAM124B	36.8818	-6.8231	1.05361	9.4221e-11	1.52427e-09
DPCD	34.2773	-5.44871	0.841583	9.52154e-11	1.53867e-09
FMO3	96.6771	-5.3656	0.828922	9.60845e-11	1.55102e-09
TNFRSF13B	64.026	-5.82829	0.900641	9.7186e-11	1.56639e-09
TNFRSF19	127.558	-5.90195	0.912038	9.72489e-11	1.56639e-09
CRACDL	267.885	-6.31873	0.976642	9.8094e-11	1.57828e-09
COPZ2	67.7007	-5.43288	0.840378	1.01428e-10	1.63014e-09
HSBP1L1	73.5959	-5.31698	0.822825	1.03427e-10	1.66045e-09
PLEKHA4	385.931	-5.83091	0.902771	1.05466e-10	1.69136e-09
SLC22A18	234.619	-5.00765	0.775432	1.0618e-10	1.70096e-09
CDC42EP4	784.89	-5.97462	0.925629	1.08464e-10	1.73567e-09
KLK7	49.2949	-8.39004	1.3	1.09032e-10	1.74286e-09
USP27X	43.1845	-5.16315	0.800048	1.09258e-10	1.74458e-09
BBS12	138.22	-5.14607	0.797564	1.10209e-10	1.75787e-09
PLD2	770.453	-5.21942	0.809158	1.11531e-10	1.77702e-09
PMP22	351.155	-5.59736	0.86812	1.13577e-10	1.80768e-09
KLK6	48.1126	-7.50952	1.16478	1.13957e-10	1.80995e-09
NPIPA8	38.0922	-5.92237	0.918601	1.13965e-10	1.80995e-09
BAIAP2L1	234.339	-6.13835	0.95234	1.15183e-10	1.82733e-09
POR	1787.61	-5.15732	0.800253	1.15902e-10	1.83675e-09
HORMAD1	54.0833	-5.65354	0.87732	1.16285e-10	1.84085e-09
IGHA2	854.504	-6.54755	1.01622	1.17087e-10	1.85156e-09
KLK10	82.3743	-7.43603	1.15432	1.17956e-10	1.8633e-09
MUC12	166.385	-6.14161	0.953748	1.19908e-10	1.89009e-09
PDGFB	87.4903	-5.48444	0.851677	1.19802e-10	1.89009e-09
ST3GAL6	123.924	-4.79722	0.745516	1.23667e-10	1.94726e-09
CD177	39.4289	-7.13863	1.10955	1.24434e-10	1.95725e-09
EAF2	184.738	-5.77148	0.897427	1.26648e-10	1.98719e-09
FNBP1L	392.332	-5.38407	0.837202	1.26742e-10	1.98719e-09
GPER1	68.9576	-6.69881	1.04163	1.267e-10	1.98719e-09
HDX	145.131	-4.9272	0.766828	1.31499e-10	2.05959e-09
HDHD3	239.023	-6.36863	0.991814	1.35208e-10	2.11543e-09
PRAM1	140.361	-4.61701	0.719168	1.36341e-10	2.1309e-09
BEX2	45.9411	-5.52759	0.86114	1.37248e-10	2.14282e-09
CFI	263.637	-5.59264	0.871726	1.40277e-10	2.18779e-09
TGFB3	246.811	-4.3094	0.671788	1.40987e-10	2.19654e-09
CLIC3	48.062	-6.12598	0.954999	1.41152e-10	2.19679e-09
LIPT2-AS1	24.3114	-5.98203	0.932644	1.41696e-10	2.20293e-09
LTF	4693.9	-6.3401	0.988583	1.42391e-10	2.2114e-09
DKK3	315.519	-5.43209	0.847291	1.4445e-10	2.24103e-09
CLIC5	255.104	-5.37769	0.838837	1.44676e-10	2.24217e-09
KIF13A	2428.94	-5.29285	0.825694	1.45342e-10	2.25013e-09
IGHV1-3	86.8473	-5.36285	0.837147	1.49289e-10	2.30882e-09
TMEM121B	120.233	-6.01206	0.939143	1.5371e-10	2.3747e-09
IL20RA	39.2216	-7.08947	1.10763	1.54785e-10	2.38689e-09
ST6GALNAC2	263.455	-6.8714	1.07357	1.54823e-10	2.38689e-09
DIP2C	330.721	-5.385	0.842171	1.61401e-10	2.48571e-09
IL34	52.0794	-6.14595	0.961219	1.61693e-10	2.48726e-09
P2RY11	254.663	-5.34275	0.835618	1.61839e-10	2.48726e-09
MEIS1	561.252	-5.8839	0.920635	1.64669e-10	2.5255e-09
PTN	72.9318	-5.99766	0.938435	1.64665e-10	2.5255e-09
WDR49	37.3134	-5.62198	0.880033	1.67653e-10	2.56859e-09
IGLL5	386.435	-5.84486	0.915044	1.68596e-10	2.57769e-09
NUDT12	221.825	-5.47735	0.85749	1.68454e-10	2.57769e-09
IGHV4-34	34.8203	-6.33267	0.991783	1.71248e-10	2.61552e-09
S100A7	100.298	-9.31453	1.45895	1.72047e-10	2.625e-09
SLC24A3	112.387	-5.25569	0.82331	1.72961e-10	2.63623e-09
ADCY5	82.2345	-5.76713	0.90412	1.78569e-10	2.7189e-09
HSPA12B	135.04	-6.24294	0.978768	1.78985e-10	2.72241e-09
MFAP2	108.159	-5.83885	0.915657	1.80976e-10	2.74986e-09
RNF39	95.0685	-7.32133	1.14862	1.84115e-10	2.79469e-09
BMP4	47.8865	-5.91612	0.9286	1.8779e-10	2.84754e-09
UGGT2	399.452	-5.23718	0.822059	1.8803e-10	2.84825e-09
RMDN2	162.18	-5.31911	0.835002	1.88809e-10	2.85568e-09
TSPAN1	338.036	-6.66865	1.04687	1.88908e-10	2.85568e-09
PLLP	32.0319	-6.61626	1.03873	1.89572e-10	2.8628e-09
NMB	81.0765	-6.44888	1.01253	1.90151e-10	2.86859e-09
FAM47E	21.3294	-6.00746	0.944382	2.00103e-10	3.01218e-09
KCNK6	221.887	-5.25505	0.826101	2.00098e-10	3.01218e-09
ZNF362	396.104	-5.23139	0.8224	2.00282e-10	3.01218e-09
MRGPRF	132.364	-5.62005	0.88368	2.01979e-10	3.03364e-09
PAIP2B	30.1684	-6.56673	1.03255	2.02119e-10	3.03364e-09
DNASE1L3	60.9868	-5.78585	0.910023	2.04506e-10	3.06635e-09
SPRR2A	197.948	-8.56219	1.34731	2.08377e-10	3.12122e-09
DNAI7	25.2158	-6.08716	0.957875	2.08619e-10	3.12167e-09
RIMS1	92.966	-7.07312	1.11316	2.0965e-10	3.13075e-09
RRAGB	94.6838	-5.33666	0.839869	2.0958e-10	3.13075e-09
SLC9A3	45.8243	-5.59308	0.880294	2.10268e-10	3.1368e-09
KANK4	38.5709	-7.23156	1.13857	2.13302e-10	3.17884e-09
TCTN1	145.259	-4.86575	0.766441	2.17421e-10	3.23696e-09
YPEL5	619.427	-5.68172	0.895438	2.22149e-10	3.30403e-09
WASHC1	71.1966	-6.14269	0.968146	2.22717e-10	3.30913e-09
PMEPA1	217.083	-5.88185	0.92708	2.23156e-10	3.31232e-09
NBPF1	412.634	-5.10381	0.804649	2.25483e-10	3.34349e-09
IGIP	124.7	-5.81763	0.917211	2.25717e-10	3.3436e-09
ERG	326.368	-5.7254	0.902719	2.26221e-10	3.34435e-09
TMEM276	46.3966	-5.8933	0.929178	2.2608e-10	3.34435e-09
SLC22A17	52.083	-5.43002	0.856202	2.26823e-10	3.3499e-09
CCDC183-AS1	41.8453	-4.8981	0.77243	2.28043e-10	3.36455e-09
RGS12	953.461	-5.23211	0.825196	2.29107e-10	3.37687e-09
FCRLA	63.1808	-6.64364	1.04804	2.31076e-10	3.40249e-09
KRT4	170.67	-6.82704	1.07729	2.339e-10	3.44063e-09
HEBP1	173.522	-5.73654	0.905544	2.37478e-10	3.48979e-09
IGFBP3	818.969	-6.4712	1.02192	2.41383e-10	3.54365e-09
ABCB11	55.9908	-6.6989	1.05803	2.42836e-10	3.56143e-09
FBLN1	1959.21	-5.15289	0.814204	2.47166e-10	3.62134e-09
SYT17	113.316	-5.70201	0.901066	2.4824e-10	3.63346e-09
KLF9	645.433	-5.05849	0.799417	2.48794e-10	3.63796e-09
SLURP2	37.2962	-8.10297	1.28083	2.51023e-10	3.66693e-09
DMKN	460.401	-6.28801	0.993967	2.51312e-10	3.66751e-09
PCSK1	63.9331	-6.06894	0.959511	2.53172e-10	3.691e-09
STK32C	159.32	-4.86764	0.769674	2.54393e-10	3.70515e-09
TCEAL2	27.3786	-6.33588	1.00222	2.58469e-10	3.76081e-09
TSPAN15	362.445	-6.185	0.9784	2.58957e-10	3.76419e-09
MOK	55.5964	-4.89992	0.775138	2.59288e-10	3.76529e-09
EDA	23.3868	-6.18928	0.979266	2.61005e-10	3.7865e-09
NR5A2	131.988	-5.71648	0.904523	2.61757e-10	3.79368e-09
ITGB6	121.628	-5.96572	0.945043	2.74295e-10	3.96759e-09
RAMP2	111.216	-5.75146	0.911081	2.74053e-10	3.96759e-09
IGHM	4980	-5.66319	0.897203	2.75352e-10	3.97898e-09
EPB41L1	318.641	-5.25441	0.832648	2.78155e-10	4.01164e-09
PTPRS	856.943	-5.51743	0.874312	2.77972e-10	4.01164e-09
ZMYND15	320.826	-5.41339	0.857871	2.78567e-10	4.01366e-09
NDN	121.807	-6.22373	0.98707	2.87705e-10	4.14127e-09
HSD17B1	23.5664	-6.37835	1.01167	2.88594e-10	4.15001e-09
PERP	2976.91	-7.21079	1.14419	2.93633e-10	4.21836e-09
KCTD3	645.024	-4.92924	0.782466	2.98363e-10	4.28215e-09
VSIG10	385.728	-5.34258	0.848272	3.01125e-10	4.31759e-09
SH3YL1	185.602	-5.28086	0.838602	3.03043e-10	4.34087e-09
MEST	218.194	-6.168	0.979609	3.04663e-10	4.35984e-09
PITPNM3	134.099	-6.16688	0.980052	3.12598e-10	4.46906e-09
SERPINB3	4624.26	-8.0965	1.28708	3.16215e-10	4.51639e-09
CLEC1A	89.5557	-5.01355	0.79737	3.224e-10	4.60028e-09
GIPC2	15.3243	-5.60734	0.891832	3.22732e-10	4.60057e-09
TSPAN12	39.143	-5.88489	0.936089	3.24341e-10	4.61904e-09
SAA1	372.047	-6.21889	0.989268	3.24998e-10	4.62393e-09
TPSB2	23.9458	-5.70844	0.908143	3.26087e-10	4.63497e-09
MSMB	532.777	-8.62705	1.37299	3.31283e-10	4.70429e-09
CLEC12B	32.0624	-5.14129	0.818423	3.34365e-10	4.74348e-09
PRRG1	232.147	-5.81369	0.925614	3.36606e-10	4.77068e-09
ANKRD36BP2	141.385	-5.72564	0.911659	3.37578e-10	4.77986e-09
PTK6	157.781	-6.00502	0.956329	3.40234e-10	4.81286e-09
GJB6	192.964	-6.99393	1.11401	3.42663e-10	4.84257e-09
TSPAN11	100.651	-5.88634	0.937955	3.48023e-10	4.91361e-09
TXNRD3	149.549	-5.65367	0.901198	3.52998e-10	4.97909e-09
RTL8C	396.139	-5.63855	0.898877	3.54429e-10	4.99451e-09
MMRN2	1131.22	-5.53434	0.882434	3.57176e-10	5.0284e-09
ELAPOR1	347.339	-5.6964	0.908874	3.66799e-10	5.15897e-09
KCTD14	30.31	-6.42668	1.02594	3.74781e-10	5.2662e-09
LY96	239.823	-6.14646	0.981333	3.76712e-10	5.2883e-09
THAP8	63.5032	-5.52492	0.882534	3.84267e-10	5.38924e-09
CHST6	330.406	-6.80253	1.08703	3.90166e-10	5.46677e-09
AGPAT2	358.173	-5.34681	0.854471	3.91315e-10	5.47361e-09
JCHAIN	1316.03	-5.94739	0.950454	3.91396e-10	5.47361e-09
EPAS1	4113.98	-4.93792	0.789485	3.98525e-10	5.56802e-09
CXCL17	171.184	-7.09966	1.13534	4.01789e-10	5.60832e-09
ZDHHC9	503.974	-5.793	0.926567	4.04936e-10	5.6469e-09
CATSPERB	70.9822	-6.1771	0.988532	4.13734e-10	5.75968e-09
CYB5R2	279.704	-5.69634	0.9116	4.13804e-10	5.75968e-09
HOOK2	616.024	-5.14784	0.824136	4.20162e-10	5.84267e-09
CCDC159	108.575	-5.0163	0.803602	4.31277e-10	5.99159e-09
GCNT4	177.852	-5.82789	0.934176	4.41688e-10	6.13045e-09
CTTNBP2	59.5958	-5.45492	0.874579	4.45481e-10	6.17147e-09
PCDHGB7	229.751	-5.3215	0.853186	4.45445e-10	6.17147e-09
GGT6	201.487	-6.46529	1.03661	4.46233e-10	6.17486e-09
IL9R	68.6207	-7.06894	1.13342	4.46562e-10	6.17486e-09
LHX6	45.4055	-6.0448	0.969397	4.49955e-10	6.21594e-09
NAALADL2	65.9263	-5.23721	0.840275	4.58361e-10	6.32615e-09
IGHV3-49	49.1553	-5.80037	0.93076	4.6092e-10	6.35553e-09
ADAMTS3	25.5797	-6.40764	1.02849	4.65924e-10	6.41853e-09
GXYLT2	224.021	-5.78891	0.929362	4.69708e-10	6.46462e-09
PTPN3	560.667	-5.69625	0.91468	4.73683e-10	6.51325e-09
CRYM	46.1346	-7.23881	1.16243	4.74502e-10	6.51607e-09
DNAI4	49.2966	-5.66776	0.910163	4.74865e-10	6.51607e-09
EFNA1	202.111	-5.51884	0.886265	4.75213e-10	6.51607e-09
NT5E	622.489	-5.3205	0.854635	4.8011e-10	6.57711e-09
CCT6B	121.049	-5.71341	0.917847	4.82162e-10	6.5991e-09
SIL1	539.208	-4.90897	0.788674	4.83622e-10	6.61294e-09
SPAG4	109.314	-5.62683	0.90403	4.84131e-10	6.61376e-09
ANKRD6	182.628	-5.0169	0.806476	4.94701e-10	6.75192e-09
ACACB	477.99	-4.51592	0.726317	5.0494e-10	6.88529e-09
SYP	56.7511	-6.57561	1.0588	5.28472e-10	7.19951e-09
RXRA	931.966	-5.27388	0.849261	5.29951e-10	7.213e-09
KCNMB1	71.2421	-5.0345	0.810745	5.30798e-10	7.21788e-09
FAM83C	35.3064	-7.77755	1.25264	5.33547e-10	7.24857e-09
SLC45A3	113.939	-6.39035	1.02942	5.37573e-10	7.29656e-09
NHLRC1	39.201	-5.69147	0.917561	5.54608e-10	7.52085e-09
SHANK2	224.402	-5.59195	0.901886	5.63629e-10	7.63616e-09
IGHV1-18	125.13	-5.71934	0.922657	5.69046e-10	7.69542e-09
TNNT1	38.2375	-6.73793	1.08697	5.68956e-10	7.69542e-09
LINC00571	23.4659	-6.15855	0.993726	5.73918e-10	7.75421e-09
TUSC3	223.454	-5.52129	0.891015	5.7687e-10	7.78695e-09
MSRA	82.8485	-4.9095	0.792606	5.86105e-10	7.90438e-09
SLC39A13-AS1	43.4279	-4.9439	0.79858	5.98356e-10	8.06223e-09
DDIT4L	51.1763	-6.32859	1.02254	6.0505e-10	8.14498e-09
ALDH2	873.449	-4.95823	0.801211	6.07702e-10	8.16922e-09
HAAO	128.997	-5.08607	0.821878	6.07958e-10	8.16922e-09
MSRB1	135.586	-5.05111	0.816393	6.12799e-10	8.22678e-09
CYP2S1	101.154	-4.7572	0.769326	6.26592e-10	8.40431e-09
SETD9	58.3485	-5.75131	0.930119	6.2728e-10	8.40589e-09
MANBAL	169.044	-4.95064	0.801387	6.50891e-10	8.71437e-09
ABCA12	99.5017	-7.21075	1.16731	6.52415e-10	8.72686e-09
MCC	800.853	-5.47518	0.88647	6.5585e-10	8.76486e-09
CAMKK1	135.81	-5.40701	0.875494	6.57657e-10	8.78106e-09
B9D1	56.4422	-6.25807	1.01364	6.66416e-10	8.88996e-09
AKR1C2	80.5289	-6.07387	0.984071	6.73515e-10	8.97655e-09
SEMA6C	54.9653	-4.91673	0.797019	6.87636e-10	9.15648e-09
ECM1	185.554	-5.23101	0.848206	6.95347e-10	9.24248e-09
NRN1	138.01	-5.3411	0.866053	6.95219e-10	9.24248e-09
TRPM4	579.949	-5.32929	0.864373	7.02616e-10	9.33069e-09
PRDX2	480.39	-5.4426	0.882972	7.09492e-10	9.41353e-09
FHL1	136.836	-4.37796	0.710395	7.15117e-10	9.47964e-09
DAG1	1708.55	-5.29603	0.859853	7.31009e-10	9.67809e-09
MINDY4	71.8086	-5.32288	0.864225	7.314e-10	9.67809e-09
KANK3	119.543	-5.27104	0.855882	7.33889e-10	9.70233e-09
MPV17L	68.9979	-5.90359	0.958661	7.35919e-10	9.72046e-09
KIF17	70.207	-5.59919	0.909277	7.37404e-10	9.73136e-09
SORT1	1308.11	-5.52761	0.897723	7.39643e-10	9.75218e-09
PAWR	438.806	-4.97578	0.808137	7.4089e-10	9.75991e-09
SFRP1	363.794	-6.13106	0.995798	7.41676e-10	9.76155e-09
SH3BP4	925.782	-5.60655	0.910637	7.42612e-10	9.76515e-09
WASF1	35.7834	-5.52	0.896602	7.43324e-10	9.76581e-09
KRT6B	1082.65	-6.55666	1.06512	7.46897e-10	9.80402e-09
CYP2B7P	120.606	-6.58969	1.07068	7.52371e-10	9.86709e-09
STS	572.378	-4.96208	0.806525	7.63114e-10	9.9991e-09
ANGPTL4	196.606	-6.74422	1.09622	7.64021e-10	1.00021e-08
ZC3H6	1396.12	-4.44036	0.721874	7.69206e-10	1.00611e-08
GRTP1	69.8407	-6.20729	1.00929	7.74012e-10	1.0115e-08
RAB9A	335.802	-4.39288	0.714426	7.80608e-10	1.01921e-08
ABCC2	59.5806	-4.92178	0.800505	7.82939e-10	1.02135e-08
KLF11	319.294	-4.76392	0.774945	7.87473e-10	1.02636e-08
ID4	99.702	-6.28749	1.02308	7.96281e-10	1.03692e-08
C2orf81	60.6366	-4.94674	0.805128	8.04471e-10	1.04666e-08
PLK2	1256.23	-5.06073	0.824158	8.22726e-10	1.06947e-08
CD79A	192.347	-5.56721	0.906772	8.27332e-10	1.07381e-08
MORN2	55.0868	-4.678	0.761944	8.27519e-10	1.07381e-08
TMEM220	19.5476	-5.93258	0.966718	8.41854e-10	1.09145e-08
GPX8	215.924	-6.03859	0.984374	8.54568e-10	1.10608e-08
PAK6	110.373	-5.82572	0.949676	8.54638e-10	1.10608e-08
RASIP1	200.494	-5.56352	0.906977	8.56227e-10	1.1067e-08
RFTN2	114.897	-6.04427	0.985361	8.56614e-10	1.1067e-08
RAB40C	138.229	-4.92977	0.803701	8.57843e-10	1.10731e-08
MUC2	236.108	-6.75198	1.10095	8.63012e-10	1.11301e-08
ABHD8	159.965	-4.7013	0.766696	8.68417e-10	1.11803e-08
SOWAHD	122.961	-5.01186	0.817328	8.67793e-10	1.11803e-08
BPIFB1	628.935	-8.14556	1.32846	8.70213e-10	1.11937e-08
SCGB3A1	58.4157	-8.56022	1.39643	8.78436e-10	1.12896e-08
CYP2F1	172.293	-7.14537	1.16567	8.79685e-10	1.12958e-08
RIBC1	21.0315	-5.84669	0.954534	9.05857e-10	1.16217e-08
XDH	93.5361	-6.17693	1.00852	9.083e-10	1.1643e-08
ERLIN2	342.696	-4.99229	0.815161	9.10831e-10	1.16653e-08
ZNF536	46.9511	-6.7429	1.10111	9.14066e-10	1.16966e-08
PTGES	231.252	-5.78451	0.944634	9.15158e-10	1.17004e-08
NIPAL1	173.229	-6.51739	1.06477	9.30159e-10	1.18819e-08
PRRX2	70.6584	-5.59862	0.915046	9.45144e-10	1.20629e-08
HSD17B11	591.698	-4.88809	0.799119	9.54442e-10	1.2171e-08
EPHB3	259.904	-5.18254	0.84731	9.5675e-10	1.21899e-08
CST6	60.5585	-6.55897	1.07238	9.57869e-10	1.21936e-08
IGHV1-24	21.1934	-6.15978	1.00752	9.7274e-10	1.23722e-08
CFAP99	29.3483	-6.59609	1.07912	9.80939e-10	1.24658e-08
ANO5	45.9223	-5.59273	0.915156	9.88672e-10	1.25532e-08
SMPDL3B	51.8594	-6.517	1.06654	9.93653e-10	1.26056e-08
TPSAB1	37.6936	-6.97824	1.14217	9.98714e-10	1.2659e-08
POLL	219.127	-4.6646	0.764083	1.02907e-09	1.30326e-08
DSC2	1209.85	-4.2265	0.692603	1.04531e-09	1.32268e-08
SOCS6	711.429	-4.86231	0.796993	1.05524e-09	1.3341e-08
TMPRSS11D	34.2056	-8.2056	1.34504	1.05644e-09	1.33447e-08
GASK1B-AS1	29.5035	-5.7906	0.949403	1.06597e-09	1.34537e-08
ARHGEF15	294.056	-5.05849	0.829792	1.08687e-09	1.37057e-08
CASTOR3P	381.572	-5.18733	0.851016	1.0913e-09	1.37381e-08
FPR3	539.547	-5.05729	0.829682	1.09127e-09	1.37381e-08
CSTPP1	566.705	-5.18754	0.851587	1.11776e-09	1.40592e-08
KANSL1L	290.276	-4.32696	0.710406	1.12325e-09	1.41042e-08
MYH15	61.4253	-5.86792	0.963392	1.12284e-09	1.41042e-08
MTMR11	155.728	-5.2199	0.857231	1.13437e-09	1.42317e-08
NDUFA4L2	38.5626	-5.73911	0.942571	1.13773e-09	1.42617e-08
AQP5	367.613	-6.50208	1.06854	1.16482e-09	1.45889e-08
ABCA10	66.9737	-5.41291	0.889687	1.17171e-09	1.46573e-08
PDZK1IP1	151.727	-6.15197	1.0112	1.17326e-09	1.46573e-08
ZFYVE9	452.422	-4.64624	0.763686	1.17248e-09	1.46573e-08
MACROD1	44.8189	-4.95873	0.815151	1.178e-09	1.47041e-08
GPR153	163.487	-5.27186	0.866741	1.18404e-09	1.4767e-08
PPP1R9A	256.125	-5.20423	0.855753	1.19097e-09	1.48408e-08
RAI2	58.4607	-5.36928	0.883429	1.21861e-09	1.51724e-08
ZNF595	277.868	-4.56584	0.75135	1.22574e-09	1.52484e-08
ADH7	21.558	-7.61425	1.254	1.26344e-09	1.57041e-08
LY75	1563.01	-4.79446	0.789909	1.28201e-09	1.59216e-08
CNTNAP3P2	21.1676	-5.99293	0.987832	1.30521e-09	1.61946e-08
GPBAR1	116.097	-5.07504	0.83655	1.3062e-09	1.61946e-08
EFCAB12	26.4805	-6.53376	1.07744	1.32637e-09	1.64171e-08
ZXDA	348.417	-4.93878	0.814404	1.32545e-09	1.64171e-08
NRG2	75.4301	-4.90214	0.808427	1.32944e-09	1.64414e-08
IGKV3D-15	48.3855	-5.08675	0.839139	1.3455e-09	1.66261e-08
NIPAL4	62.8918	-6.61521	1.09131	1.34676e-09	1.66277e-08
MAP3K9	431.873	-4.83951	0.798454	1.35198e-09	1.66782e-08
CCDC170	74.1265	-4.70962	0.7773	1.37008e-09	1.68874e-08
CXCL14	86.4328	-5.46579	0.902446	1.38992e-09	1.71176e-08
SLC16A9	105.964	-6.61103	1.09158	1.39236e-09	1.71333e-08
ZNF799	183.757	-4.99212	0.824963	1.43661e-09	1.76631e-08
OMD	54.9125	-6.41544	1.06026	1.44124e-09	1.77052e-08
SPEG	127.074	-4.74308	0.783936	1.44543e-09	1.77419e-08
MPZL1	1198.65	-5.05512	0.835589	1.4505e-09	1.77894e-08
RAB38	157.725	-5.50663	0.910852	1.48867e-09	1.82424e-08
PRPF40B	333.711	-5.3422	0.883705	1.49198e-09	1.82678e-08
NKIRAS1	124.733	-4.89416	0.809809	1.50723e-09	1.84391e-08
ZNF703	95.2507	-4.31162	0.713698	1.52936e-09	1.86944e-08
NEK11	35.1065	-5.7705	0.955346	1.53902e-09	1.8797e-08
EPHX1	84.338	-5.0086	0.829438	1.55507e-09	1.89773e-08
GINM1	604.428	-5.17414	0.857019	1.56646e-09	1.91004e-08
TNFAIP1	916.224	-4.73223	0.78404	1.58276e-09	1.92833e-08
CFAP92	17.5121	-6.04029	1.00094	1.59347e-09	1.93977e-08
PROS1	360.937	-5.36962	0.890149	1.61673e-09	1.96647e-08
CHRM3	24.8431	-5.60648	0.929479	1.62087e-09	1.96988e-08
KLK8	30.3592	-8.47575	1.40522	1.62333e-09	1.97125e-08
CDK14	362.267	-5.00863	0.830453	1.62744e-09	1.97461e-08
RAB40B	107.004	-4.98391	0.826442	1.63392e-09	1.98085e-08
HDAC11	175.247	-4.84499	0.803471	1.63884e-09	1.98517e-08
FRAT1	94.5879	-5.17681	0.858589	1.64522e-09	1.99127e-08
MATCAP2	29.6188	-6.47906	1.07485	1.66122e-09	2.00899e-08
LRG1	149.25	-5.55348	0.921609	1.68227e-09	2.03277e-08
GRAP	135.445	-5.04461	0.838184	1.76042e-09	2.12547e-08
ATG9B	104.722	-5.94	0.987087	1.76912e-09	2.13422e-08
DMTN	143.733	-5.71809	0.950495	1.78886e-09	2.15627e-08
ITGA3	791.541	-5.22248	0.868134	1.79048e-09	2.15647e-08
BBS5	77.5883	-5.02723	0.835714	1.79348e-09	2.15832e-08
GAS2L1	370.973	-5.49275	0.913706	1.83803e-09	2.21013e-08
MGST2	570.847	-5.73211	0.953555	1.84036e-09	2.21113e-08
CADM3-AS1	49.5754	-5.04578	0.839429	1.84427e-09	2.21403e-08
SEMA6A	268.573	-5.28234	0.878903	1.85349e-09	2.22329e-08
SH3BGRL2	142.054	-5.36524	0.892882	1.86789e-09	2.23873e-08
TMTC1	411.646	-5.08422	0.846473	1.89734e-09	2.27218e-08
EFHC1	145.335	-5.06922	0.844114	1.9089e-09	2.28418e-08
IGKV3D-20	28.9343	-6.58496	1.0966	1.91443e-09	2.28894e-08
WNK3	136.766	-5.69303	0.948154	1.92124e-09	2.29522e-08
FCRL2	80.0564	-5.07545	0.845484	1.93688e-09	2.31204e-08
SLC22A4	73.4896	-4.5808	0.763332	1.96034e-09	2.33815e-08
KCNJ5	110.684	-5.5156	0.919665	2.00505e-09	2.38954e-08
GPR87	108.899	-7.15537	1.19342	2.02634e-09	2.41297e-08
PGBD1	131.455	-4.82453	0.804736	2.03269e-09	2.41858e-08
MOCOS	556.022	-6.25574	1.04371	2.05075e-09	2.43809e-08
SUOX	394.444	-5.16772	0.862247	2.05605e-09	2.44243e-08
UPK3BL1	187.373	-5.83964	0.974442	2.06259e-09	2.44823e-08
FOXO4	385.777	-5.01828	0.837539	2.07665e-09	2.46294e-08
CC2D2B	19.481	-4.9346	0.823622	2.08117e-09	2.46632e-08
BLCAP	708.461	-5.25618	0.877568	2.10505e-09	2.49261e-08
FLACC1	29.8314	-4.98756	0.832893	2.12134e-09	2.50988e-08
DUOXA2	199.43	-6.67322	1.11467	2.14124e-09	2.53139e-08
UBXN10	54.6788	-6.86788	1.14741	2.15668e-09	2.54761e-08
ARAP3	417.974	-5.10222	0.852774	2.18939e-09	2.58418e-08
DNAJB12	828.541	-4.97902	0.832241	2.19516e-09	2.58892e-08
NUAK1	522.862	-4.65597	0.778393	2.21081e-09	2.60529e-08
CXXC5	513.219	-5.04842	0.844174	2.22717e-09	2.62247e-08
HTRA3	189.81	-5.52693	0.924369	2.24316e-09	2.6371e-08
TMEM175	317.016	-4.52266	0.756406	2.24315e-09	2.6371e-08
TMEM222	243.885	-4.94508	0.82711	2.24863e-09	2.64142e-08
KLF5	1277.48	-5.96812	0.998911	2.30626e-09	2.70696e-08
ZFYVE21	623.253	-5.13576	0.859622	2.30874e-09	2.70772e-08
CLDN10	254.481	-7.63945	1.27873	2.31133e-09	2.7086e-08
ADGRL2	1387.09	-4.697	0.786243	2.31531e-09	2.71111e-08
MTFR1L	494.632	-4.81296	0.806045	2.35693e-09	2.75767e-08
CNN3	2039.62	-5.44908	0.912628	2.36155e-09	2.76088e-08
SNTN	49.7036	-8.74611	1.4653	2.38956e-09	2.79142e-08
FAM149A	47.4391	-5.26224	0.882074	2.43508e-09	2.84234e-08
GPX1	2009.55	-5.94485	0.996544	2.4394e-09	2.84513e-08
TTC34	47.1299	-4.89866	0.821314	2.45503e-09	2.8611e-08
S1PR5	36.9221	-5.80552	0.973471	2.46546e-09	2.87099e-08
LATS2	678.89	-4.92142	0.825246	2.46767e-09	2.8713e-08
CEP68	844.099	-4.8637	0.815731	2.48583e-09	2.88787e-08
NHERF2	539.063	-5.6662	0.95032	2.48536e-09	2.88787e-08
PARM1	667.644	-5.65376	0.948325	2.49409e-09	2.89519e-08
CACNA1E	204.62	-5.36977	0.90096	2.52159e-09	2.9248e-08
ESPN	131.447	-5.9706	1.00182	2.52583e-09	2.92742e-08
BMS1P4-AGAP5	24.1934	-6.25061	1.04886	2.5308e-09	2.93088e-08
GLTP	674.582	-4.79377	0.804468	2.53893e-09	2.93799e-08
SPSB2	150.284	-5.14351	0.863454	2.57076e-09	2.97249e-08
DNAH8	93.5754	-5.32768	0.894426	2.57646e-09	2.97442e-08
SPACA9	41.7007	-5.50256	0.923773	2.57514e-09	2.97442e-08
PPP1R16A	476.077	-5.50138	0.9237	2.58788e-09	2.98527e-08
GNA14	138.6	-5.48794	0.921553	2.59914e-09	2.99591e-08
ZGLP1	33.0313	-6.24678	1.04968	2.66349e-09	3.06769e-08
SGIP1	99.579	-5.00161	0.840705	2.6928e-09	3.09903e-08
TAS2R13	40.3805	-5.40611	0.909076	2.73409e-09	3.1441e-08
SLC18A2	35.3712	-6.84445	1.15134	2.76821e-09	3.18086e-08
PTGS1	274.528	-5.61148	0.94422	2.79882e-09	3.21352e-08
MELTF	109.69	-5.33011	0.897291	2.84631e-09	3.26551e-08
IMPG2	57.1679	-4.80757	0.809383	2.85372e-09	3.27147e-08
C3orf70	99.3116	-5.92524	0.997765	2.87615e-09	3.29207e-08
GRIN3B	31.7807	-7.02808	1.18347	2.87595e-09	3.29207e-08
KCNK13	116.63	-5.09177	0.857539	2.8912e-09	3.30672e-08
KDR	882.431	-4.96914	0.836965	2.90113e-09	3.31552e-08
TSNAX-DISC1	44.6626	-5.56947	0.938274	2.92294e-09	3.33786e-08
CFAP46	52.1774	-6.67028	1.12407	2.95555e-09	3.37248e-08
GPR89B	112.323	-5.20612	0.877379	2.9615e-09	3.37665e-08
HS1BP3	659.812	-5.35829	0.903307	2.9952e-09	3.41245e-08
ZNF582	64.148	-5.05182	0.851676	2.99957e-09	3.41479e-08
EXPH5	965.873	-6.01139	1.01366	3.02183e-09	3.43747e-08
NFIB	1407.2	-4.61791	0.778802	3.03863e-09	3.45392e-08
HS3ST1	148.877	-6.21451	1.04831	3.06373e-09	3.47977e-08
DEPTOR	47.9096	-5.08716	0.858181	3.06955e-09	3.4837e-08
PFKM	522.277	-4.92597	0.831414	3.12655e-09	3.54566e-08
ADAM29	33.8591	-6.30133	1.06383	3.15683e-09	3.57726e-08
ZBTB42	143.496	-5.11853	0.864173	3.16043e-09	3.57858e-08
DNAI3	23.8532	-5.50695	0.93003	3.19491e-09	3.61485e-08
PPP2R2C	36.1828	-6.33558	1.07037	3.23822e-09	3.66104e-08
STATH	532.498	-7.96425	1.34582	3.26356e-09	3.68687e-08
CACHD1	227.435	-5.09636	0.861263	3.27248e-09	3.69412e-08
CMTM4	84.1614	-5.81431	0.982968	3.31763e-09	3.74223e-08
NEURL3	23.1576	-6.27506	1.06103	3.3367e-09	3.76087e-08
ZNF90	72.1223	-5.69952	0.963995	3.37163e-09	3.79733e-08
DUOXA1	172.633	-6.09169	1.03036	3.37525e-09	3.79851e-08
CDS1	32.4842	-6.17707	1.04485	3.38175e-09	3.80292e-08
IQSEC2	363.592	-4.48449	0.758686	3.40326e-09	3.8242e-08
BACE1	344.895	-4.89419	0.828314	3.44984e-09	3.87358e-08
JAM3	252.843	-5.22748	0.884876	3.47155e-09	3.895e-08
HFE	199.72	-4.68408	0.793143	3.51117e-09	3.93645e-08
CHDH	57.3087	-5.7312	0.970613	3.53247e-09	3.95719e-08
PLEKHB1	31.5756	-5.80156	0.982548	3.53503e-09	3.95719e-08
CCDC13	16.4818	-5.70445	0.966365	3.56963e-09	3.9929e-08
GPR157	356.324	-5.57099	0.944447	3.66418e-09	4.09555e-08
ISYNA1	285.066	-5.01254	0.850083	3.71213e-09	4.14601e-08
TTC12	115.403	-4.81053	0.815898	3.72442e-09	4.15658e-08
TMEM87A	1553.62	-4.99923	0.8481	3.75528e-09	4.18786e-08
RGS22	16.6339	-5.37124	0.911248	3.76081e-09	4.19086e-08
SMAD1	549.612	-4.97611	0.844481	3.80379e-09	4.23556e-08
BOLA1	83.9126	-5.98941	1.01674	3.84343e-09	4.27647e-08
SLC10A6	26.6919	-6.61122	1.12256	3.87541e-09	4.3088e-08
CAMSAP3	226.085	-5.46573	0.928431	3.93117e-09	4.3675e-08
CHID1	569.957	-4.54134	0.771616	3.96877e-09	4.40597e-08
TMEM150C	33.5684	-5.27725	0.897291	4.07005e-09	4.515e-08
ARHGAP39	203.11	-6.13109	1.04266	4.09685e-09	4.53893e-08
SOX10	66.8071	-5.64043	0.959225	4.09778e-09	4.53893e-08
INKA1	47.2049	-5.50643	0.936456	4.10096e-09	4.53906e-08
PFN2	204.158	-4.83908	0.823149	4.13403e-09	4.5688e-08
WLS	256.981	-5.07017	0.862448	4.13224e-09	4.5688e-08
SUGT1P4-STRA6LP-CCDC180	35.4667	-5.18303	0.882183	4.22258e-09	4.66317e-08
TSPYL5	333.007	-5.32255	0.906292	4.28263e-09	4.72595e-08
RAVER2	322.39	-5.52209	0.940463	4.31423e-09	4.75726e-08
RHCG	312.4	-6.21028	1.05824	4.39764e-09	4.84562e-08
SHC2	27.489	-5.15639	0.878775	4.41873e-09	4.86159e-08
TPPP3	104.888	-5.23772	0.892629	4.41757e-09	4.86159e-08
FRK	353.365	-6.00506	1.02344	4.42429e-09	4.86408e-08
PPCS	1051.18	-4.86842	0.829762	4.43081e-09	4.86763e-08
RHOD	56.5764	-5.75963	0.981737	4.44346e-09	4.87789e-08
SLC52A3	75.7727	-6.00907	1.02542	4.62532e-09	5.07375e-08
ARL3	319.722	-4.72947	0.807179	4.6493e-09	5.09627e-08
LMNTD2	64.729	-5.29987	0.904722	4.68468e-09	5.13123e-08
AKAP6	428.815	-5.31754	0.908343	4.79572e-09	5.24896e-08
ODAD1	13.7418	-5.34844	0.913902	4.848e-09	5.30225e-08
ELL3	36.3497	-5.14083	0.878676	4.89629e-09	5.3511e-08
EBF4	127.651	-5.63029	0.962751	4.97134e-09	5.42911e-08
MAGED1	1567.37	-5.22442	0.893424	4.98623e-09	5.44133e-08
ZNF532	1698.35	-3.89816	0.666672	4.99941e-09	5.45169e-08
CLCN2	113.993	-4.86514	0.832304	5.05379e-09	5.50691e-08
TOM1L2	697.659	-4.69004	0.80249	5.08525e-09	5.53711e-08
PECAM1	3895.16	-4.44241	0.760522	5.18063e-09	5.6368e-08
SPAG8	24.0741	-5.28116	0.904206	5.19931e-09	5.65296e-08
FAAH2	146.425	-5.04307	0.863763	5.26769e-09	5.72309e-08
RFX2	407.698	-5.5675	0.953654	5.28096e-09	5.73328e-08
ARSI	52.6475	-5.7348	0.982501	5.31681e-09	5.76796e-08
PON2	405.384	-5.86698	1.00524	5.33481e-09	5.78323e-08
KRT16	3119.54	-7.30438	1.25215	5.42883e-09	5.88084e-08
SLIT1	28.8541	-5.49899	0.942729	5.44224e-09	5.89104e-08
FAM13C	31.223	-4.84924	0.831521	5.48394e-09	5.93182e-08
LINGO2	48.7932	-7.32442	1.25598	5.48844e-09	5.93234e-08
CIMIP1	51.738	-10.275	1.76213	5.50991e-09	5.95119e-08
FCER1A	32.4598	-6.6943	1.14809	5.51564e-09	5.95301e-08
AMOTL1	1596.47	-4.96097	0.850892	5.5323e-09	5.96663e-08
EPS8	1046.41	-5.40511	0.927223	5.56438e-09	5.99685e-08
TREM2	63.4304	-4.8238	0.827837	5.64355e-09	6.07773e-08
COCH	26.1227	-5.30092	0.909834	5.66878e-09	6.10046e-08
KLK11	178.786	-6.56279	1.1279	5.93493e-09	6.38221e-08
TRIM2	1184.69	-5.59287	0.961788	6.06077e-09	6.51279e-08
LHPP	176.315	-4.74976	0.816861	6.07616e-09	6.52457e-08
LIPN	34.3806	-5.77421	0.99355	6.1845e-09	6.63608e-08
B4GALT6	90.1054	-4.8845	0.84048	6.18939e-09	6.6365e-08
OXER1	55.0537	-4.59307	0.790421	6.21305e-09	6.65703e-08
CFAP157	22.8806	-6.548	1.12696	6.23565e-09	6.6764e-08
PDZD7	37.859	-4.66433	0.803111	6.32854e-09	6.76603e-08
ZNF214	25.3499	-6.2447	1.07522	6.32815e-09	6.76603e-08
CLNK	167.108	-4.72065	0.812851	6.3404e-09	6.77381e-08
ZNF667	25.3658	-5.24485	0.90332	6.39109e-09	6.82302e-08
SPR	25.2502	-5.83374	1.00506	6.46049e-09	6.89213e-08
KIF26A	188.402	-4.88089	0.84128	6.56314e-09	6.99657e-08
CAVIN1	3115.05	-5.02278	0.865797	6.57866e-09	7.00805e-08
ZNF568	297.721	-4.98119	0.858738	6.60816e-09	7.0344e-08
GLIS2	108.47	-4.79161	0.826141	6.63186e-09	7.05454e-08
GAPT	110.578	-4.48171	0.7728	6.65846e-09	7.07773e-08
SMAGP	94.3996	-5.20863	0.898165	6.66366e-09	7.07816e-08
SNAP25	47.6062	-4.81982	0.831208	6.68814e-09	7.09905e-08
IGLV3-19	76.829	-5.03066	0.867802	6.75039e-09	7.15998e-08
SIGLEC5	139.994	-5.28778	0.912258	6.77674e-09	7.18276e-08
TMEM98	177.992	-4.83047	0.833425	6.79448e-09	7.19639e-08
GGACT	62.339	-4.99981	0.862783	6.83297e-09	7.23197e-08
EPN2	542.409	-4.72732	0.816571	7.07081e-09	7.47833e-08
DNAJB2	858.869	-4.58335	0.791841	7.11374e-09	7.51834e-08
CNTN4	20.1456	-5.9839	1.03406	7.17425e-09	7.57687e-08
SIX5	194.564	-4.68044	0.808997	7.23061e-09	7.63093e-08
SLC13A2	29.3575	-7.92238	1.36941	7.24102e-09	7.63646e-08
AKR1B10	182.372	-7.80333	1.34925	7.3173e-09	7.70586e-08
KLHDC7B	986.548	-4.73772	0.81919	7.31989e-09	7.70586e-08
NTN1	257.482	-6.37548	1.10238	7.3225e-09	7.70586e-08
TDRD15	24.5299	-5.42534	0.938359	7.39372e-09	7.77526e-08
RNF122	97.3075	-4.15836	0.719461	7.47779e-09	7.85255e-08
SULT2B1	81.1906	-6.14994	1.06404	7.47786e-09	7.85255e-08
CFTR	48.9865	-6.08703	1.05329	7.51269e-09	7.88352e-08
KCNE3	251.951	-4.41953	0.764817	7.53532e-09	7.90164e-08
SOX18	143.775	-5.11981	0.886074	7.55577e-09	7.91746e-08
NQO2	213.576	-4.32597	0.749092	7.69795e-09	8.06072e-08
C1QTNF5	106.826	-5.49322	0.95138	7.74364e-09	8.10282e-08
FZD7	153.919	-5.01952	0.869422	7.76868e-09	8.12325e-08
GNA11	539.221	-4.71788	0.817538	7.88803e-09	8.24221e-08
IL22RA1	30.5466	-7.1226	1.23453	7.95127e-09	8.30241e-08
DOK4	150.071	-5.6887	0.986177	8.00111e-09	8.34854e-08
ATP8B1	726.536	-5.10248	0.884942	8.12292e-09	8.46722e-08
FAM3D	28.9596	-6.85224	1.18842	8.12633e-09	8.46722e-08
IGHV2-26	25.4806	-6.17666	1.0718	8.26797e-09	8.60873e-08
CES4A	34.888	-4.22896	0.733878	8.28824e-09	8.62375e-08
RHBDL2	16.3065	-5.68599	0.986771	8.30174e-09	8.6317e-08
DGAT2	165.656	-5.66981	0.984631	8.49603e-09	8.8275e-08
MGLL	535.977	-4.45413	0.773544	8.5073e-09	8.83298e-08
TMED3	663.343	-5.06993	0.880648	8.56003e-09	8.88148e-08
LPCAT2	653.047	-4.51212	0.783993	8.64812e-09	8.96658e-08
LAMA1	63.812	-4.69445	0.815843	8.70974e-09	9.02412e-08
FAM8A1	699.959	-4.4946	0.781231	8.7553e-09	9.06497e-08
DHX32	547.784	-5.06932	0.881145	8.7621e-09	9.06564e-08
IGHV3-73	17.8094	-6.10715	1.06159	8.77546e-09	9.0731e-08
SPSB3	499.451	-4.71556	0.819821	8.82246e-09	9.11531e-08
EFNB2	413.855	-5.5865	0.971315	8.84647e-09	9.13371e-08
CNTN1	49.1471	-5.7896	1.00734	9.06232e-09	9.35004e-08
GBP1P1	96.8113	-4.67779	0.814115	9.14535e-09	9.4291e-08
RBP1	225.557	-5.51283	0.959616	9.2015e-09	9.48037e-08
CCDC152	25.5956	-5.52496	0.961797	9.22389e-09	9.49681e-08
AK5	18.7618	-5.94283	1.03473	9.28208e-09	9.55006e-08
FXYD3	422.838	-6.03372	1.0506	9.29606e-09	9.55778e-08
MTARC2	103.199	-5.00247	0.871077	9.30917e-09	9.56459e-08
PNPLA2	609.957	-4.80412	0.836651	9.35142e-09	9.60132e-08
SMOX	199.89	-4.87973	0.850336	9.54682e-09	9.79512e-08
CCN4	104.094	-5.47522	0.954218	9.58527e-09	9.82774e-08
PPP2R5B	172.678	-4.5063	0.785377	9.59444e-09	9.8303e-08
SIGLEC16	102.88	-5.64764	0.984651	9.71233e-09	9.94418e-08
CERCAM	100.023	-4.69878	0.819601	9.86658e-09	1.00951e-07
PPM1F-AS1	71.9558	-4.77095	0.83226	9.89518e-09	1.01174e-07
AVPI1	104.688	-5.38844	0.940128	9.94849e-09	1.01648e-07
ALOX15B	42.1268	-5.52282	0.963712	9.99724e-09	1.02076e-07
SLC47A1	72.5059	-4.88719	0.85336	1.02223e-08	1.04302e-07
EMP2	438.671	-5.16566	0.90218	1.02975e-08	1.04996e-07
GTF2IRD2B	654.417	-4.9124	0.858011	1.03232e-08	1.05185e-07
CPQ	491.921	-4.61572	0.80627	1.03564e-08	1.05451e-07
ZNF135	135.272	-4.99852	0.873326	1.04324e-08	1.06152e-07
REEP3	1193.89	-4.79168	0.837694	1.06474e-08	1.08264e-07
ENPP5	21.9025	-5.83625	1.02052	1.0723e-08	1.08951e-07
SGMS1-AS1	64.3134	-4.25252	0.743608	1.07297e-08	1.08951e-07
EPHB6	254.634	-5.12548	0.896379	1.07794e-08	1.09306e-07
VENTX	26.9632	-5.67177	0.991906	1.07751e-08	1.09306e-07
MEGF9	766.933	-4.04939	0.708382	1.08806e-08	1.10256e-07
IFIT1	743.056	-4.38986	0.768179	1.09941e-08	1.11329e-07
ESYT3	37.9939	-5.72241	1.0016	1.10811e-08	1.12133e-07
HOMER3	506.73	-4.95139	0.86702	1.12438e-08	1.13702e-07
SLC6A6	3154.4	-4.314	0.755866	1.14745e-08	1.15955e-07
SCAMP5	112.68	-4.06948	0.713056	1.14919e-08	1.16051e-07
MS4A14	146.001	-4.2776	0.749589	1.15262e-08	1.16318e-07
TCTN2	116.398	-5.12519	0.898265	1.15894e-08	1.16876e-07
DEFB1	17.8847	-6.03325	1.05776	1.17169e-08	1.18082e-07
SUN1	1000	-4.02367	0.705491	1.17472e-08	1.18306e-07
ZMYND10	67.4456	-4.88746	0.857002	1.17738e-08	1.18493e-07
SSBP2	383.212	-4.55263	0.798512	1.18835e-08	1.19515e-07
LCN2	912.116	-7.6267	1.33782	1.19231e-08	1.19832e-07
TLR10	325.817	-4.80727	0.843289	1.19369e-08	1.19889e-07
PINLYP	33.5571	-5.09569	0.894089	1.20291e-08	1.20732e-07
PCYOX1	555.922	-4.57865	0.803427	1.20585e-08	1.20946e-07
ATP6V1E2	78.8544	-4.52582	0.794193	1.20772e-08	1.2105e-07
KRT24	69.238	-8.66843	1.52181	1.22546e-08	1.22746e-07
UNC13B	2155.71	-5.2149	0.916178	1.25544e-08	1.25663e-07
VWA5A	812.92	-5.09424	0.895351	1.27299e-08	1.27334e-07
TMEM273	179.639	-5.02446	0.883306	1.28348e-08	1.28296e-07
SAXO4	10.3755	-4.92976	0.866692	1.28523e-08	1.28384e-07
AK7	16.6337	-5.48069	0.963605	1.28768e-08	1.28542e-07
DSC1	88.2542	-6.45907	1.13588	1.29747e-08	1.29431e-07
GARNL3	56.3153	-4.13767	0.727744	1.30346e-08	1.29941e-07
TCEANC	222.31	-4.63088	0.814665	1.31273e-08	1.30777e-07
RGL2	1092.14	-4.89101	0.860823	1.33297e-08	1.32704e-07
PKP1	662.616	-6.04487	1.06393	1.33409e-08	1.32726e-07
IDO2	26.5665	-4.82658	0.849664	1.34244e-08	1.33466e-07
ZNF287	178.914	-4.57702	0.806123	1.36427e-08	1.35545e-07
ABCG2	51.6036	-5.34428	0.941364	1.36949e-08	1.35972e-07
CHRNA7	77.9253	-5.88561	1.03682	1.37381e-08	1.36309e-07
PEG10	131.872	-5.345	0.942131	1.40069e-08	1.38883e-07
GDPD3	55.5165	-4.28096	0.754595	1.40163e-08	1.38883e-07
GLB1L	199.614	-4.60014	0.811229	1.4232e-08	1.40925e-07
CLEC4D	56.7062	-4.90731	0.865606	1.43448e-08	1.41947e-07
RWDD2A	123.38	-4.77975	0.843245	1.44232e-08	1.42628e-07
ZNF584	247.598	-5.09305	0.899134	1.47547e-08	1.45808e-07
YAE1	42.9252	-4.48431	0.791861	1.48744e-08	1.46892e-07
MAP3K13	709.441	-4.5818	0.809117	1.48996e-08	1.47042e-07
KIAA2012	56.6878	-7.64883	1.35123	1.5079e-08	1.48713e-07
MIPOL1	91.5568	-4.62518	0.817113	1.51029e-08	1.4885e-07
PDLIM4	327.388	-5.07275	0.896277	1.51546e-08	1.4926e-07
DCBLD1	174.574	-4.42559	0.781953	1.51676e-08	1.49288e-07
EPHA4	458.393	-4.67838	0.826659	1.51915e-08	1.49423e-07
ACVR2A	326.847	-5.1365	0.908052	1.54387e-08	1.51754e-07
ARRDC1	339.016	-4.27635	0.756008	1.54502e-08	1.51766e-07
TCAF1P1	20.1584	-5.9799	1.05771	1.57079e-08	1.54194e-07
ARSJ	219.645	-5.05465	0.894142	1.57604e-08	1.54607e-07
RAB1AP1	59.64	-4.54243	0.803982	1.60522e-08	1.57365e-07
TTC39B	500.245	-4.4949	0.795695	1.61357e-08	1.58079e-07
SCNN1B	71.2132	-4.8651	0.861263	1.61579e-08	1.5819e-07
TSGA10	47.6727	-4.55423	0.806417	1.62817e-08	1.59297e-07
PPP1R14C	103.465	-5.76865	1.02189	1.65116e-08	1.6144e-07
KLHDC10	739.448	-4.28136	0.758811	1.67897e-08	1.6405e-07
IGLV2-8	258.837	-5.21703	0.924757	1.6856e-08	1.64588e-07
CLTB	1085.62	-5.0967	0.903623	1.69751e-08	1.65642e-07
PELI2	190.209	-4.15046	0.735905	1.70106e-08	1.65879e-07
LRCH2	76.9799	-4.75294	0.842848	1.70893e-08	1.66536e-07
ANOS1	305.636	-5.28558	0.937483	1.71984e-08	1.67489e-07
CHSY3	41.8726	-4.60823	0.8175	1.73053e-08	1.68418e-07
RBKS	18.8343	-5.87699	1.04265	1.73451e-08	1.68695e-07
EXOSC10-AS1	49.4319	-4.56304	0.809583	1.7375e-08	1.68874e-07
EML5	66.8904	-4.50961	0.800731	1.78263e-08	1.73146e-07
SPRR2D	408.205	-8.06543	1.43249	1.79848e-08	1.74571e-07
TFEB	315.704	-4.28561	0.761425	1.81879e-08	1.76427e-07
KIR3DL1	20.4907	-6.21271	1.10408	1.83341e-08	1.77728e-07
ZCCHC24	521.187	-5.03653	0.895111	1.83673e-08	1.77932e-07
RALGPS1	196.154	-4.64613	0.825763	1.83933e-08	1.78067e-07
SWAP70	1548.78	-4.34853	0.773158	1.86181e-08	1.80125e-07
ODAD2	14.5781	-5.81169	1.03395	1.90011e-08	1.83711e-07
GNAI1	325.885	-5.42584	0.966344	1.96778e-08	1.90129e-07
FBLN7	59.2494	-4.85211	0.864623	2.00206e-08	1.93314e-07
SIAE	127.097	-4.90079	0.873428	2.01185e-08	1.94096e-07
ZNF19	71.0763	-4.39523	0.783338	2.01279e-08	1.94096e-07
CIPC	503.079	-4.33105	0.772266	2.04403e-08	1.9698e-07
DISC1	473.372	-4.06599	0.72507	2.05014e-08	1.97379e-07
WDR86	80.4418	-5.02447	0.896002	2.05085e-08	1.97379e-07
SH3RF1	446.114	-5.64228	1.00666	2.08328e-08	2.00369e-07
TMT1B	66.3094	-5.02055	0.895886	2.09452e-08	2.01319e-07
ZNF223	66.5347	-5.07991	0.906509	2.09691e-08	2.01418e-07
LTB4R	211.898	-4.47214	0.798186	2.10829e-08	2.02379e-07
PIP5K1B	46.8219	-4.72142	0.843005	2.1349e-08	2.04718e-07
PKP3	82.8652	-6.51218	1.16275	2.13543e-08	2.04718e-07
SOX7	19.5097	-5.92611	1.05817	2.13904e-08	2.04931e-07
ADORA2B	68.7519	-5.12593	0.915438	2.15067e-08	2.05912e-07
DTX4	554.841	-5.23731	0.93539	2.15515e-08	2.06207e-07
ALOX15	310.608	-5.13579	0.917301	2.15839e-08	2.06383e-07
SMIM3	25.7538	-6.06292	1.08317	2.17605e-08	2.07937e-07
AASS	414.65	-4.63059	0.827597	2.20338e-08	2.10412e-07
SCUBE1	12.5199	-5.42487	0.969614	2.20782e-08	2.107e-07
CYB5A	533.034	-4.57487	0.817803	2.21767e-08	2.11503e-07
DRC1	19.4183	-6.00824	1.07412	2.22341e-08	2.11776e-07
RPH3AL	61.5306	-4.34364	0.776525	2.22293e-08	2.11776e-07
L3MBTL4	143.352	-4.49718	0.804102	2.23431e-08	2.12677e-07
ESR2	32.632	-5.77443	1.03307	2.27583e-08	2.1649e-07
KLHL24	1115.21	-4.48585	0.802721	2.29293e-08	2.17976e-07
TPST1	349.878	-4.43441	0.793745	2.31436e-08	2.19871e-07
CEP15	56.7789	-5.0345	0.901756	2.36413e-08	2.24455e-07
FBXL7	62.8723	-4.79244	0.858443	2.36797e-08	2.24531e-07
KIAA0040	208.22	-4.00832	0.717979	2.36694e-08	2.24531e-07
MUC20P1	130.406	-6.11991	1.09708	2.42817e-08	2.30092e-07
COLCA1	25.5669	-5.79107	1.03817	2.43074e-08	2.30187e-07
IL23R	64.4296	-4.81098	0.862585	2.44153e-08	2.31061e-07
TNFSF8	187.407	-4.67417	0.838136	2.44892e-08	2.31611e-07
TOP6BL	194.034	-4.26598	0.765469	2.50343e-08	2.36615e-07
SFT2D3	190.455	-5.17586	0.92888	2.51613e-08	2.37663e-07
ADSS1	116.029	-5.27355	0.946474	2.52138e-08	2.38007e-07
GLDN	309.348	-4.98329	0.894752	2.5552e-08	2.41045e-07
HSD3B7	147.888	-5.15594	0.92621	2.59601e-08	2.44738e-07
KRT72	26.7804	-6.39958	1.14981	2.60987e-08	2.45888e-07
PDGFD	51.4347	-4.7872	0.860496	2.64713e-08	2.49113e-07
TP53I11	482.141	-4.69525	0.843971	2.64748e-08	2.49113e-07
RDH13	164.619	-4.22531	0.759661	2.66543e-08	2.50566e-07
TGFBI	4381.17	-4.35229	0.782499	2.66632e-08	2.50566e-07
CNN1	91.9693	-4.85503	0.872981	2.6755e-08	2.51269e-07
ISLR	225.745	-5.24385	0.943222	2.70543e-08	2.53918e-07
CPLANE2	16.3335	-5.56415	1.00096	2.71648e-08	2.54794e-07
CETN2	242.521	-4.47966	0.806661	2.80259e-08	2.62702e-07
SLC5A5	110.095	-5.77333	1.03983	2.82094e-08	2.64255e-07
MAP6	65.4369	-5.55921	1.00148	2.84079e-08	2.65946e-07
CLEC12A	325.79	-4.44751	0.801579	2.88226e-08	2.69657e-07
IGHV3-13	48.2684	-5.43551	0.980033	2.9185e-08	2.72874e-07
MGST1	135.734	-5.09382	0.91848	2.92409e-08	2.73224e-07
UBTD1	124.652	-4.97476	0.897085	2.9316e-08	2.73752e-07
GJD3-AS1	68.7285	-4.7555	0.857643	2.9422e-08	2.74568e-07
C22orf15	44.9683	-6.50476	1.17349	2.97196e-08	2.7717e-07
ABCA5	781.224	-3.96797	0.716113	3.00787e-08	2.8027e-07
HMGN5	64.2522	-4.73413	0.854413	3.0109e-08	2.8027e-07
ZNF16	274.229	-4.51082	0.814108	3.01067e-08	2.8027e-07
RNF180	158.673	-4.67044	0.843152	3.03753e-08	2.8257e-07
LGALS7	80.4173	-8.24573	1.48989	3.12172e-08	2.90219e-07
LPAR6	1126.68	-4.04541	0.73115	3.14898e-08	2.9257e-07
GABRE	139.112	-4.11301	0.743427	3.15688e-08	2.93119e-07
HMGCL	246.139	-4.96439	0.897839	3.21573e-08	2.98395e-07
MCF2L	501.618	-4.05932	0.734177	3.21936e-08	2.98545e-07
FLG2	43.2859	-6.63731	1.20055	3.2288e-08	2.99232e-07
PRKAB2	134.275	-4.83663	0.874875	3.23218e-08	2.99357e-07
TMEM38A	25.0921	-5.69879	1.03095	3.24484e-08	3.00341e-07
SLCO4C1	48.888	-5.28923	0.956941	3.25324e-08	3.0093e-07
UST	39.7697	-5.38862	0.975209	3.28361e-08	3.03548e-07
FLT3	135.649	-4.21043	0.762021	3.28834e-08	3.03796e-07
CHMP4C	86.4204	-5.29015	0.957526	3.29833e-08	3.04528e-07
EXT1	802.199	-3.96009	0.717538	3.40929e-08	3.14575e-07
TFAP2C	166.465	-5.28249	0.95725	3.42106e-08	3.15464e-07
CD1C	35.9142	-4.71824	0.855055	3.4278e-08	3.15888e-07
IQCG	177.754	-4.27127	0.774219	3.45075e-08	3.17805e-07
TMEM213	24.114	-6.6485	1.20518	3.45573e-08	3.18065e-07
LRRC10B	25.9826	-6.86229	1.24399	3.46101e-08	3.18352e-07
LARP6	69.5286	-5.03037	0.912003	3.47321e-08	3.19276e-07
PLAC9	15.9084	-5.64461	1.02411	3.55369e-08	3.2647e-07
IGLV8-61	19.4804	-5.51693	1.00102	3.56215e-08	3.27044e-07
GPRASP1	424.587	-4.35108	0.789802	3.60727e-08	3.30981e-07
UBXN11	504.6	-4.50875	0.818557	3.62601e-08	3.32493e-07
ZKSCAN4	179.723	-3.46011	0.628486	3.68177e-08	3.37396e-07
MAP3K21	126.403	-4.42872	0.804836	3.74163e-08	3.42669e-07
CXCL2	76.9358	-4.37188	0.794613	3.75728e-08	3.43889e-07
FBXO8	349.371	-4.74217	0.862503	3.8379e-08	3.50833e-07
NEXMIF	110.452	-4.99003	0.907567	3.83576e-08	3.50833e-07
C11orf54	472.74	-4.34917	0.791479	3.90728e-08	3.56954e-07
SMAD5	836.167	-4.28669	0.780299	3.93713e-08	3.59458e-07
GPRC5C	239.164	-5.8081	1.05755	3.97333e-08	3.62539e-07
HAL	11.2174	-5.04331	0.918583	4.0122e-08	3.65714e-07
PKD1P6	113.476	-5.11055	0.930838	4.01309e-08	3.65714e-07
IGSF3	600.953	-5.65409	1.02987	4.01729e-08	3.65723e-07
TFPI2	19.0971	-6.10428	1.11188	4.01814e-08	3.65723e-07
IER5L	249.765	-4.96773	0.904996	4.03687e-08	3.67201e-07
SRSF8	571.211	-4.66061	0.849268	4.06971e-08	3.6996e-07
C12orf76	115.179	-4.74437	0.865181	4.16578e-08	3.7846e-07
ZNF366	186.486	-3.79826	0.692984	4.22892e-08	3.8396e-07
FGD5-AS1	391.766	-4.84929	0.884846	4.24402e-08	3.85093e-07
GRM2	40.7797	-4.85479	0.886003	4.26699e-08	3.86703e-07
TRAK1	1841.25	-4.66642	0.851623	4.2665e-08	3.86703e-07
KITLG	362.599	-5.67749	1.03636	4.29433e-08	3.88942e-07
P2RY14	442.774	-4.80153	0.87667	4.3257e-08	3.91141e-07
PEX10	296.699	-4.82723	0.881368	4.32657e-08	3.91141e-07
UXS1	410.336	-4.31695	0.788186	4.32416e-08	3.91141e-07
KRTDAP	59.8886	-9.55227	1.74468	4.37312e-08	3.95107e-07
SLC37A2	536.089	-4.61032	0.842552	4.45342e-08	4.02116e-07
ZNF524	331.378	-4.43227	0.810314	4.50503e-08	4.06527e-07
ACTG2	59.3202	-4.70927	0.861015	4.51462e-08	4.07144e-07
HOMEZ	673.504	-4.56806	0.835432	4.5539e-08	4.10436e-07
OMG	27.4506	-5.91626	1.08214	4.57257e-08	4.11866e-07
DCLK2	47.9363	-4.41753	0.808517	4.66181e-08	4.19648e-07
UBTD2	716.368	-4.73941	0.867753	4.71581e-08	4.2425e-07
SLPI	2126.61	-6.19332	1.13424	4.75262e-08	4.27301e-07
GPD1	15.3059	-5.26189	0.96387	4.78492e-08	4.29943e-07
AATK	84.2126	-4.68749	0.85885	4.81896e-08	4.32739e-07
ZNF599	51.765	-4.66378	0.854538	4.82452e-08	4.32974e-07
PRKD1	152.634	-4.96479	0.909784	4.83948e-08	4.34053e-07
GPR82	29.0872	-4.86343	0.891255	4.84685e-08	4.34449e-07
ITM2B	7723.09	-3.82197	0.70065	4.90004e-08	4.38951e-07
NDRG2	611.996	-4.94387	0.906431	4.91898e-08	4.4038e-07
DOCK3	47.7694	-4.30751	0.789841	4.93475e-08	4.41524e-07
OSCAR	67.4057	-4.50286	0.825813	4.96279e-08	4.43764e-07
SLC49A3	125.835	-4.77804	0.876333	4.97211e-08	4.44328e-07
ALDH1L2	92.8049	-4.86871	0.893111	4.99732e-08	4.4631e-07
OBSL1	565.808	-4.74376	0.870386	5.0318e-08	4.49118e-07
PHETA2	74.0666	-4.8804	0.896043	5.13377e-08	4.57942e-07
POLD4	725.672	-4.17892	0.767293	5.14251e-08	4.58445e-07
NCF1C	198.412	-4.63092	0.850343	5.15296e-08	4.59099e-07
SORBS1	341.432	-4.25289	0.780972	5.16212e-08	4.59638e-07
IGLV1-44	171.464	-5.0345	0.924849	5.22154e-08	4.64647e-07
SPATA6L	50.4542	-5.03887	0.926115	5.30228e-08	4.71548e-07
FHAD1	296.124	-4.37815	0.80509	5.3855e-08	4.7866e-07
QPCT	124.842	-4.57161	0.840936	5.43872e-08	4.831e-07
PROM1	341.123	-5.77228	1.06182	5.44281e-08	4.83172e-07
NIBAN3	116.428	-4.56427	0.839711	5.46372e-08	4.84736e-07
ANGPTL1	56.4393	-5.1043	0.939333	5.51163e-08	4.88693e-07
TCN1	374.448	-6.64122	1.2223	5.52993e-08	4.90022e-07
NOTCH4	409.123	-4.24767	0.781838	5.54371e-08	4.90823e-07
PACSIN3	160.062	-5.18391	0.954176	5.54563e-08	4.90823e-07
CRY2	483.79	-4.17069	0.767738	5.55877e-08	4.91692e-07
DYNLT2B	18.7315	-5.79973	1.06771	5.5747e-08	4.92532e-07
SLITRK4	125.928	-4.86943	0.896447	5.57495e-08	4.92532e-07
SELENOM	278.481	-4.88141	0.899012	5.64332e-08	4.98274e-07
PYROXD2	75.0598	-4.86864	0.896871	5.6837e-08	5.01539e-07
C20orf96	30.7554	-4.53131	0.834837	5.70621e-08	5.03225e-07
TBX19	79.9963	-4.63894	0.854897	5.75281e-08	5.07031e-07
RGPD3	63.4231	-4.44405	0.819428	5.84902e-08	5.15203e-07
ECEL1	86.2218	-4.99641	0.921659	5.9233e-08	5.21434e-07
ERC2	15.3221	-4.97444	0.917698	5.94122e-08	5.22699e-07
CREB3L1	203.209	-5.32801	0.983064	5.96653e-08	5.24613e-07
CATSPERG	83.2691	-4.23999	0.782557	6.02277e-08	5.29243e-07
DCDC2	13.1401	-5.89942	1.08906	6.06067e-08	5.32256e-07
SLC44A3	43.7434	-5.23926	0.967502	6.12063e-08	5.37202e-07
COL10A1	19.8807	-6.20143	1.14524	6.12971e-08	5.3768e-07
P3H4	128.716	-4.75829	0.878913	6.16908e-08	5.40812e-07
SDK2	96.0209	-4.64884	0.858733	6.17681e-08	5.41168e-07
STPG1	94.3998	-5.05013	0.932998	6.20468e-08	5.43287e-07
SPATA7	173.632	-4.46105	0.824551	6.29256e-08	5.50655e-07
CHMP3	2208.49	-3.28009	0.606347	6.31681e-08	5.52403e-07
RNU2-2P	322.106	-5.8956	1.08986	6.32003e-08	5.52403e-07
SMAD7	461.428	-3.98354	0.736744	6.41047e-08	5.59977e-07
RIC3	164.436	-4.79716	0.887637	6.50187e-08	5.67625e-07
RSPH10B	30.0191	-6.76492	1.25263	6.64214e-08	5.79528e-07
CARNMT1	786.646	4.10981	0.76106	6.66008e-08	5.80749e-07
LAMB4	16.8002	-5.9302	1.0985	6.722e-08	5.85803e-07
CLSTN2	179.56	-5.57416	1.03279	6.76896e-08	5.89546e-07
TTYH2	123.072	-4.28509	0.794189	6.83143e-08	5.94637e-07
SAMD14	55.2913	-4.81398	0.892309	6.85371e-08	5.96224e-07
PRRT3	152.582	-4.20003	0.778897	6.95721e-08	6.04871e-07
ENTREP1	17.5789	-5.68066	1.05363	6.98658e-08	6.06827e-07
MAP4K3	662.354	-4.40688	0.817379	6.98793e-08	6.06827e-07
MAGI3	670.77	-4.84591	0.898839	6.9949e-08	6.07075e-07
SLC24A4	74.7435	-4.3551	0.808774	7.25198e-08	6.29017e-07
ATP13A4	231.579	-4.99204	0.92712	7.2663e-08	6.29888e-07
IRX3	237.42	-4.9424	0.917983	7.28575e-08	6.31204e-07
BEND5	18.0362	-5.40147	1.00346	7.3306e-08	6.34716e-07
PRSS36	69.2108	-4.79307	0.89054	7.35814e-08	6.36727e-07
EFNA4	86.3027	-5.27462	0.980306	7.42443e-08	6.42087e-07
CLECL1P	34.1135	-5.23673	0.973544	7.48856e-08	6.47254e-07
GRIP1	60.2851	-4.61466	0.858056	7.53012e-08	6.50465e-07
TST	479.58	-5.50205	1.02324	7.56969e-08	6.535e-07
GRIN3A	369.855	-4.74019	0.881615	7.58566e-08	6.54496e-07
ROBO4	449.132	-4.54746	0.846101	7.6753e-08	6.61843e-07
AXL	1518.19	-4.30784	0.801675	7.72027e-08	6.65332e-07
FBXO32	273.654	-4.39312	0.818016	7.85357e-08	6.76425e-07
PRKCZ	154.553	-4.74516	0.883708	7.89125e-08	6.79274e-07
VWA7	43.1695	-5.32606	0.992014	7.92001e-08	6.81352e-07
RN7SL4P	164.731	-5.60059	1.04338	7.97399e-08	6.85595e-07
ZSCAN18	178.349	-4.35061	0.810558	7.98661e-08	6.86281e-07
TRAF3IP1	750.142	-3.98021	0.741897	8.09914e-08	6.95546e-07
ADH1C	140.679	-5.90068	1.10056	8.25233e-08	7.08223e-07
IGLV2-11	215.348	-4.95704	0.924574	8.25637e-08	7.08223e-07
LMF1	214.187	-4.57016	0.853006	8.42849e-08	7.22568e-07
LGI4	75.3348	-4.51183	0.842229	8.46101e-08	7.24935e-07
EXTL3	1184.15	-4.61284	0.861363	8.54233e-08	7.31478e-07
IFNGR1	2312.21	-4.38067	0.81847	8.68616e-08	7.43362e-07
AGR3	28.64	-8.26921	1.54506	8.69802e-08	7.43946e-07
LGALSL	37.2978	-5.30623	0.992242	8.90708e-08	7.61385e-07
TMCC3	166.04	-4.85794	0.908747	9.00421e-08	7.69242e-07
SAV1	387.829	-3.94155	0.737416	9.03744e-08	7.71634e-07
RAB11FIP5	467.38	-4.33531	0.811221	9.08249e-08	7.75032e-07
IGKV1-8	62.5305	-5.21917	0.976736	9.11778e-08	7.77594e-07
OLFML2A	358.025	-4.9803	0.932269	9.18632e-08	7.82987e-07
ALG12	292.72	-4.3523	0.814776	9.2071e-08	7.84305e-07
NDST1	1534.03	-4.20188	0.786794	9.26829e-08	7.89061e-07
TMUB2	562.329	-4.00792	0.750536	9.29036e-08	7.90485e-07
GOLGA6L9-AS1	120.682	7.44389	1.39423	9.34267e-08	7.94477e-07
MIEF2	295.105	-4.65777	0.872625	9.41568e-08	8.00225e-07
GUCY1A2	99.0263	-4.92275	0.922335	9.43552e-08	8.01449e-07
UBL3	777.355	-4.44288	0.832537	9.47267e-08	8.04142e-07
A2ML1	339.967	-5.99473	1.12393	9.62158e-08	8.16312e-07
PLA1A	310.306	-4.16153	0.780274	9.63796e-08	8.17233e-07
BAD	297.662	-4.48347	0.840775	9.68436e-08	8.20695e-07
ADGRG5	191.169	-4.23934	0.795268	9.78299e-08	8.27555e-07
HS6ST1	991.472	-5.35605	1.00477	9.78775e-08	8.27555e-07
HYDIN2	89.6966	-4.76776	0.894368	9.77396e-08	8.27555e-07
RNF170	478.548	-4.47567	0.839603	9.78352e-08	8.27555e-07
KHDRBS3	48.9601	-4.78779	0.898305	9.8315e-08	8.30778e-07
FEZ2	708.85	-4.58654	0.86079	9.91399e-08	8.37269e-07
RB1CC1	1920.59	-3.91851	0.73546	9.93155e-08	8.38273e-07
YIPF3	1201.15	-4.6356	0.870076	9.94036e-08	8.38536e-07
CCDC81	8.38051	-4.86979	0.91434	1.00387e-07	8.45868e-07
PROCR	67.8247	-5.25838	0.987286	1.00349e-07	8.45868e-07
TUBB2B	25.3955	-5.64982	1.06095	1.00805e-07	8.48906e-07
MEX3B	83.4233	-4.57909	0.859908	1.00901e-07	8.4923e-07
CASP10	540.102	-4.56017	0.856677	1.02018e-07	8.58138e-07
CHP1	1210.94	-4.4587	0.838012	1.03445e-07	8.69641e-07
GSTO2	19.8448	-5.86786	1.10316	1.0425e-07	8.75914e-07
SDSL	70.9389	-4.40715	0.828568	1.04339e-07	8.75931e-07
ZFAND4	153.393	-4.19155	0.788042	1.04371e-07	8.75931e-07
ZMYND12	18.9316	-5.79298	1.08961	1.05756e-07	8.8705e-07
CCDC103	15.7501	-5.58238	1.0503	1.06638e-07	8.93944e-07
AKR1C1	236.102	-5.15068	0.969119	1.06774e-07	8.94067e-07
KIR2DS4	20.1616	-6.40428	1.20497	1.06714e-07	8.94067e-07
ANKRA2	136.688	-4.12632	0.776565	1.07503e-07	8.99659e-07
RAPGEF3	332.807	-3.98681	0.750806	1.096e-07	9.1669e-07
SFRP2	445.932	-4.81705	0.907406	1.10477e-07	9.23497e-07
NCF1B	135.484	-4.13729	0.7794	1.10652e-07	9.24437e-07
XK	16.6914	-5.40989	1.01924	1.10977e-07	9.2663e-07
LYPD2	103.086	-6.47767	1.22082	1.12066e-07	9.35197e-07
CAPN13	424.917	-6.22531	1.1734	1.12454e-07	9.37903e-07
BEND4	29.4081	-5.45458	1.02836	1.13208e-07	9.43657e-07
SLC2A12	158.516	-5.20332	0.981224	1.13985e-07	9.49599e-07
GTF2IRD1	269.183	-5.05406	0.954098	1.17581e-07	9.79005e-07
ODAD4	36.1254	-4.8031	0.906857	1.1809e-07	9.82682e-07
NR2F6	475.629	-4.8181	0.910031	1.1939e-07	9.92939e-07
KLHDC8B	230.277	-4.29103	0.810544	1.19663e-07	9.94652e-07
P2RX5-TAX1BP3	15.9767	-5.10078	0.963772	1.20643e-07	1.00223e-06
FBXO25	251.441	-4.49728	0.84984	1.21044e-07	1.005e-06
FILIP1	221.825	-4.65029	0.879086	1.2237e-07	1.01544e-06
FCRL1	54.3907	-4.32672	0.817937	1.22452e-07	1.01555e-06
PTPRN2	39.2812	-4.67029	0.882917	1.22577e-07	1.01601e-06
CORIN	15.273	-5.16122	0.975831	1.22953e-07	1.01856e-06
ABCA8	187.235	-4.64969	0.879351	1.2391e-07	1.02591e-06
MMP15	196.743	-4.77929	0.904626	1.26968e-07	1.05063e-06
FAM83F	307.522	-5.38552	1.01939	1.27048e-07	1.05071e-06
GLT8D2	92.1537	-4.52204	0.856262	1.28379e-07	1.06113e-06
MAL	35.1506	-5.38176	1.01958	1.30323e-07	1.07659e-06
UQCR11	55.1841	-5.60221	1.06256	1.34656e-07	1.11176e-06
CNFN	21.853	-6.43313	1.22065	1.36224e-07	1.12408e-06
KRT15	1477.54	-5.76061	1.09321	1.36843e-07	1.12855e-06
TMEM255B	33.6331	-4.30968	0.817882	1.36927e-07	1.12861e-06
LANCL3	62.9988	-4.39978	0.835215	1.3804e-07	1.13716e-06
LONRF2	45.3506	-4.91368	0.932974	1.3891e-07	1.14369e-06
PMFBP1	66.5897	-4.21061	0.799705	1.40031e-07	1.15227e-06
DOLK	409.565	-4.26652	0.810457	1.40691e-07	1.15706e-06
MITF	252.253	-4.32835	0.822571	1.42508e-07	1.17135e-06
HSD17B14	30.8283	-4.73368	0.899745	1.43171e-07	1.17614e-06
SLC16A4	77.4881	-4.18651	0.796046	1.44742e-07	1.18839e-06
DMRT3	46.0085	-6.04916	1.1507	1.46474e-07	1.20193e-06
FKBP10	161.298	-5.00646	0.952501	1.47126e-07	1.20661e-06
GANC	484.49	-3.69051	0.702498	1.49307e-07	1.22304e-06
SALL2	138.86	-5.20862	0.991489	1.49378e-07	1.22304e-06
SIRPB1	261.857	-4.54561	0.865263	1.49284e-07	1.22304e-06
STARD13	459.033	-4.02351	0.766118	1.5061e-07	1.23245e-06
CYBRD1	1144.22	-5.02376	0.957095	1.5295e-07	1.25037e-06
ZNF470	161.887	-4.04349	0.770342	1.5297e-07	1.25037e-06
ZER1	699.652	-3.9201	0.746888	1.53272e-07	1.25215e-06
GPR55	22.9742	-4.54767	0.866642	1.54207e-07	1.25909e-06
RABL2B	258.351	-4.22706	0.805741	1.55289e-07	1.26722e-06
GRAMD2A	18.5972	-5.8534	1.11581	1.55557e-07	1.2687e-06
ADAMTS12	507.25	-4.91555	0.937095	1.55846e-07	1.27036e-06
VWA1	312.909	-4.76571	0.908616	1.56261e-07	1.27304e-06
HEATR9	22.2908	-4.15373	0.792179	1.57625e-07	1.28344e-06
TLCD1	12.1374	-4.92652	0.939802	1.58771e-07	1.29206e-06
KLF3	1169.91	-4.15672	0.793373	1.61189e-07	1.31101e-06
RHOBTB3	865.551	-4.58195	0.875141	1.6438e-07	1.33562e-06
ZCCHC14	705.42	-4.07196	0.777735	1.64395e-07	1.33562e-06
SHROOM2	160.092	-4.71067	0.900558	1.6875e-07	1.37024e-06
AMN1	140.669	-4.71211	0.902317	1.76774e-07	1.43462e-06
ID3	280.073	-4.96145	0.950207	1.77535e-07	1.44e-06
ABHD13	808.798	-4.51498	0.864852	1.78417e-07	1.44636e-06
TIMM23B-AGAP6	97.3452	-4.1622	0.797983	1.82924e-07	1.48207e-06
SERINC5	860.459	-4.51055	0.86491	1.83766e-07	1.48808e-06
PDZK1	25.9613	-4.48579	0.860622	1.86546e-07	1.50976e-06
GSTM4	375.529	-4.97661	0.954827	1.86765e-07	1.51071e-06
PPP1R3B	489.964	-4.2609	0.818093	1.90549e-07	1.54047e-06
LAD1	331.841	-5.07464	0.974774	1.92985e-07	1.55931e-06
TMEM59	2833.95	-3.93206	0.755986	1.97974e-07	1.59874e-06
MYO1B	1467.11	-4.51502	0.868172	1.9864e-07	1.60325e-06
SLC8A3	15.5271	-5.47551	1.05295	1.99117e-07	1.60621e-06
CLEC11A	129.228	-4.49214	0.863915	1.9956e-07	1.60891e-06
ASCL2	93.986	-4.08229	0.785165	2.00074e-07	1.61217e-06
HOXA9	30.0429	-5.73331	1.10315	2.023e-07	1.62834e-06
TJP1	1637.51	-4.06032	0.781238	2.02216e-07	1.62834e-06
BNIP3	79.6611	-4.62661	0.890319	2.0299e-07	1.63299e-06
FZD6	687.5	-4.8896	0.942012	2.09622e-07	1.68543e-06
ZNF713	96.623	-4.17638	0.804639	2.09877e-07	1.68656e-06
SLC15A1	10.9643	-6.37441	1.22818	2.10164e-07	1.68794e-06
PNPLA7	145.913	-4.14023	0.798075	2.12837e-07	1.70849e-06
LGALS7B	16.6462	-7.23451	1.3946	2.13121e-07	1.70983e-06
FXYD6	233.12	-4.07615	0.785788	2.13317e-07	1.71048e-06
TMEM140	365.029	-4.36905	0.8424	2.14365e-07	1.71795e-06
GADD45G	61.0176	-3.94993	0.761643	2.14787e-07	1.72039e-06
CDK20	19.0976	-5.44864	1.05087	2.16116e-07	1.7301e-06
ROGDI	356.001	-3.6809	0.710029	2.16993e-07	1.73618e-06
ZNF57	175.507	-4.07935	0.786998	2.17851e-07	1.7421e-06
REC8	295.728	-4.24796	0.819618	2.18516e-07	1.74647e-06
SCGB1A1	39.7311	-8.67967	1.67501	2.19673e-07	1.75477e-06
PAM	2327.26	-4.31098	0.83197	2.19927e-07	1.75585e-06
CFAP20DC	49.5469	-4.92637	0.950888	2.20923e-07	1.76285e-06
RTL8A	132.004	-4.54366	0.877089	2.21421e-07	1.76586e-06
SLC48A1	59.2101	-4.54914	0.878239	2.2207e-07	1.77008e-06
MPZL3	220.96	-4.65811	0.899375	2.22746e-07	1.77451e-06
FUOM	169.545	-3.81895	0.737456	2.23626e-07	1.78056e-06
OVOL1	19.0453	-5.92904	1.14542	2.26309e-07	1.80095e-06
KIAA1191	1000.68	-4.35032	0.840507	2.26902e-07	1.8047e-06
FNDC4	14.5205	-4.89191	0.945296	2.27908e-07	1.81172e-06
BLNK	252.954	-3.36725	0.651001	2.31094e-07	1.83606e-06
DENND6B	101.7	-3.56235	0.688975	2.33464e-07	1.85389e-06
ABHD6	159.325	-4.32586	0.836941	2.3579e-07	1.87135e-06
COMP	7.47166	-5.50768	1.06578	2.36927e-07	1.87936e-06
APRG1	138.072	-4.33817	0.83964	2.38256e-07	1.88889e-06
TSPAN7	96.8208	-4.95558	0.959277	2.3922e-07	1.89551e-06
NR1D2	1070.42	-4.33818	0.840506	2.45124e-07	1.94126e-06
TBC1D12	277.656	-4.49755	0.87177	2.48131e-07	1.96402e-06
ANKRD16	27.0547	-4.33771	0.840986	2.4976e-07	1.97585e-06
ERLEC1	1782	-4.30172	0.834061	2.50192e-07	1.97812e-06
TCEAL3	749.767	-4.27791	0.829459	2.50315e-07	1.97812e-06
MIR205HG	73.5996	-5.98349	1.16104	2.55584e-07	2.01868e-06
UBXN6	1354.51	-4.03097	0.782701	2.60385e-07	2.0555e-06
KIF19	121.977	-4.17651	0.811167	2.62199e-07	2.06871e-06
ME3	203.794	-4.67633	0.909002	2.68285e-07	2.11559e-06
ETNK2	58.6159	-5.36752	1.04351	2.69358e-07	2.12292e-06
MILR1	184.338	-4.44938	0.865099	2.70086e-07	2.12752e-06
CDC42BPB	2209.73	-3.32554	0.646677	2.71099e-07	2.13436e-06
ADAMTS15	51.9195	-4.32144	0.840636	2.73747e-07	2.15406e-06
BPIFA1	1278.42	-6.80495	1.32391	2.74663e-07	2.16012e-06
SNHG7	346.15	-4.4589	0.867505	2.74859e-07	2.1605e-06
PGAP3	151.902	-4.38092	0.852966	2.805e-07	2.2025e-06
PGRMC1	550.071	-4.57305	0.89037	2.80467e-07	2.2025e-06
LIPT1	135.602	-4.17518	0.813302	2.84231e-07	2.23061e-06
CYP2C18	10.909	-5.85546	1.14083	2.85734e-07	2.24121e-06
MLF1	18.2238	-4.81968	0.939183	2.87018e-07	2.25009e-06
CTHRC1	286.611	-4.86767	0.948843	2.89568e-07	2.26887e-06
C4orf3	1905.84	-3.67769	0.717516	2.96607e-07	2.32279e-06
DNAAF9	610.952	-3.80039	0.741499	2.97108e-07	2.32548e-06
ZNRF3	145.794	-4.39165	0.857182	3.00145e-07	2.34801e-06
SAMD15	71.5734	-4.8224	0.942207	3.08468e-07	2.41184e-06
KNDC1	180.325	-4.9514	0.967849	3.12273e-07	2.4403e-06
PARVA	856.207	-5.06717	0.990616	3.13447e-07	2.44817e-06
LCN10	26.9061	-4.85893	0.949975	3.14072e-07	2.45176e-06
CCSER1	208.326	-4.43643	0.867454	3.14898e-07	2.45647e-06
TMEM256	152.032	-4.64013	0.907297	3.15008e-07	2.45647e-06
RGS5	235.527	-4.50801	0.881574	3.16088e-07	2.46358e-06
OSR1	36.6833	-5.03351	0.984775	3.19895e-07	2.49194e-06
PI16	12.4863	-5.28129	1.03335	3.20743e-07	2.49723e-06
HID1	330.972	-4.93549	0.96588	3.22439e-07	2.5091e-06
B4GALT4	655.446	-4.11819	0.806146	3.24731e-07	2.52561e-06
CYP2B6	32.2258	-7.10434	1.39075	3.25132e-07	2.52607e-06
TTLL9	10.4678	-4.82355	0.94425	3.25013e-07	2.52607e-06
FBXL15	143.515	-4.63433	0.907462	3.27459e-07	2.54281e-06
CKMT2-AS1	15.9967	-4.83037	0.945935	3.2827e-07	2.54642e-06
TNFRSF13C	110.889	-4.33031	0.848001	3.2819e-07	2.54642e-06
PDLIM3	53.8997	-4.2164	0.826344	3.35245e-07	2.59916e-06
IGKV1D-39	718.553	-5.11389	1.0023	3.35849e-07	2.60247e-06
NUDT9	129.495	-4.45384	0.873003	3.36539e-07	2.60645e-06
IL11RA	170.843	-4.28948	0.841013	3.38986e-07	2.62403e-06
DNAJB4	357.118	-4.32065	0.847159	3.39345e-07	2.62543e-06
DIPK2B	260.795	-4.34895	0.852725	3.39549e-07	2.62564e-06
IL13RA1	1781.9	-4.23979	0.831423	3.40654e-07	2.6328e-06
TNFAIP8L1	115.534	-4.05007	0.79481	3.47551e-07	2.6847e-06
KRT2	37.292	-5.81838	1.14199	3.48877e-07	2.69353e-06
PLA2G4E	102.35	-6.43675	1.2634	3.49115e-07	2.69395e-06
BSPRY	146.439	-4.84591	0.95123	3.49916e-07	2.69873e-06
LLGL2	734.651	-4.6974	0.922121	3.50356e-07	2.70071e-06
RNF11	1149.44	-4.12912	0.810726	3.52225e-07	2.71369e-06
IGLC3	1206.37	-4.72645	0.9283	3.55231e-07	2.73543e-06
HEPH	138.693	-4.41015	0.866261	3.56156e-07	2.74112e-06
SP8	103.977	-5.53924	1.08815	3.57093e-07	2.7469e-06
PPP1R1B	39.3842	-6.24688	1.2272	3.57431e-07	2.74807e-06
APOL6	6415.72	-3.72478	0.73202	3.61161e-07	2.77447e-06
KLK12	18.7785	-8.26096	1.62351	3.61242e-07	2.77447e-06
SSH3	458.416	-4.46399	0.877768	3.66436e-07	2.8129e-06
HEPHL1	47.4719	-6.79517	1.33622	3.66946e-07	2.81535e-06
TJP3	224.33	-5.25187	1.03291	3.68536e-07	2.82608e-06
CALML5	130.357	-7.26499	1.4289	3.68932e-07	2.82765e-06
IGFBP4	2448.34	-4.1916	0.824531	3.70319e-07	2.8368e-06
TRNP1	58.2422	-4.90696	0.96528	3.70628e-07	2.8377e-06
OPLAH	146.783	-4.43026	0.871656	3.72344e-07	2.84936e-06
RCE1	271.595	-4.40557	0.867063	3.75401e-07	2.87126e-06
HEIH	61.3596	-4.55921	0.897712	3.80025e-07	2.90512e-06
CKB	159.756	-4.84986	0.955629	3.87409e-07	2.96004e-06
PLD3	7018.88	-4.05085	0.798388	3.89987e-07	2.97819e-06
CPS1	93.2173	-4.56245	0.899529	3.93565e-07	3.00396e-06
CCDC74B	36.8773	-4.43907	0.875598	3.98326e-07	3.03808e-06
SERPINF2	41.5353	-4.36698	0.861388	3.98447e-07	3.03808e-06
TPBG	444.454	-4.5048	0.888727	4.00273e-07	3.05043e-06
ODAD3	13.5069	-5.38772	1.06296	4.00708e-07	3.05217e-06
P4HA3	16.3724	-4.86727	0.96064	4.04772e-07	3.08153e-06
F11R	1140.44	-3.85733	0.761493	4.07348e-07	3.09794e-06
PXDNL	13.0895	-4.48609	0.885605	4.07193e-07	3.09794e-06
PAQR7	105.401	-4.69729	0.927404	4.08438e-07	3.10463e-06
SYNC	91.396	-4.10798	0.811343	4.12302e-07	3.13239e-06
EPN3	223.696	-5.19946	1.02744	4.17893e-07	3.17323e-06
SLC35D2	450.977	-4.35162	0.85995	4.18572e-07	3.17675e-06
KRT13	423.656	-5.60377	1.10763	4.20914e-07	3.19289e-06
PDE1C	19.9837	-3.51611	0.695096	4.22666e-07	3.20453e-06
UTP3	757.946	2.70141	0.534229	4.26707e-07	3.2335e-06
IGKV2-28	479.596	-4.94983	0.97894	4.27424e-07	3.23728e-06
CD180	301.777	-4.26217	0.843018	4.28483e-07	3.24363e-06
PTGR1	604.944	-4.59552	0.908988	4.28929e-07	3.24368e-06
SELE	539.206	-5.04476	0.997842	4.2888e-07	3.24368e-06
PLPP6	132.177	-4.29952	0.850623	4.31395e-07	3.26065e-06
STARD10	456.208	-4.52469	0.895307	4.33134e-07	3.27213e-06
IQUB	39.8773	-5.34375	1.05756	4.35119e-07	3.28544e-06
ARHGEF40	852.729	-4.20821	0.833046	4.38146e-07	3.3066e-06
KIR3DL2	19.0944	-6.20888	1.23007	4.47408e-07	3.37477e-06
IL7R	1360.44	-4.5771	0.906962	4.49683e-07	3.3902e-06
SVBP	142.575	-4.45979	0.883822	4.51097e-07	3.39913e-06
ZNF630	88.5855	-3.96293	0.785635	4.55339e-07	3.42934e-06
FKRP	161.692	-3.1843	0.631705	4.63601e-07	3.48978e-06
CPVL	2072.82	-3.72892	0.739885	4.65863e-07	3.50502e-06
TMEM232	9.80969	-4.92543	0.977484	4.68253e-07	3.5212e-06
RGCC	161.304	-4.17141	0.827937	4.69635e-07	3.5298e-06
ALOX12B	16.5928	-6.14408	1.21954	4.70404e-07	3.53378e-06
CDH11	1261.64	-3.96828	0.787863	4.73474e-07	3.55503e-06
GOLGA2	2051.45	-3.36164	0.667433	4.73715e-07	3.55503e-06
PKD1P2	24.8815	-6.33437	1.25769	4.74143e-07	3.55643e-06
ARMCX3	1175.8	-4.32422	0.858648	4.75162e-07	3.56227e-06
PTP4A3	125.461	-4.59665	0.912955	4.7806e-07	3.58217e-06
SLCO2A1	531.877	-4.73693	0.940869	4.78758e-07	3.58558e-06
MEX3A	63.567	-4.64225	0.922155	4.80017e-07	3.59318e-06
SOX9	273.273	-4.66354	0.92658	4.82701e-07	3.61144e-06
CD59	1197.48	-4.58627	0.911372	4.84696e-07	3.62453e-06
UTS2	24.7581	-4.47005	0.888311	4.85196e-07	3.62643e-06
CLN8	275.921	-3.85764	0.766705	4.86769e-07	3.63635e-06
NSG1	14.3757	-5.47841	1.08892	4.87808e-07	3.64226e-06
PFKFB4	262.086	-4.70903	0.936574	4.95792e-07	3.70001e-06
HSP90AB1	9859.67	2.01594	0.401021	4.98181e-07	3.71596e-06
GPR27	22.8058	-5.31041	1.0567	5.02262e-07	3.74451e-06
PRKAG2	418.23	-4.03005	0.802256	5.07645e-07	3.78272e-06
DHRS7B	339.616	-4.20877	0.837869	5.08219e-07	3.78509e-06
ELOVL1	751.307	-3.95763	0.787995	5.10303e-07	3.79869e-06
KRT86	22.8282	-4.63301	0.922534	5.11224e-07	3.80363e-06
SMIM7	364.909	-3.81068	0.759338	5.20954e-07	3.87407e-06
CD276	156.735	-4.0464	0.80656	5.25236e-07	3.90394e-06
EFNA3	27.8733	-4.66909	0.931057	5.30803e-07	3.94334e-06
TK2	827.281	-3.59186	0.716315	5.32086e-07	3.95088e-06
WASH9P	54.3325	-4.3679	0.871139	5.33059e-07	3.95611e-06
CDKN2B	60.2317	-4.81844	0.961362	5.38395e-07	3.99371e-06
ANKRD23	112.371	-4.06421	0.810928	5.39237e-07	3.99594e-06
CCDC144CP	19.2559	-4.09848	0.817766	5.39218e-07	3.99594e-06
ZNF385D	100.026	-4.1063	0.819618	5.44241e-07	4.03099e-06
WASH2P	136.601	-4.34044	0.866801	5.5164e-07	4.08374e-06
PRKCI	407.902	-4.14026	0.826916	5.53236e-07	4.0935e-06
SIGLEC6	19.4395	-4.42676	0.884243	5.54961e-07	4.10421e-06
CIBAR1	143.151	-4.08485	0.816359	5.6226e-07	4.1561e-06
CCDC65	18.6455	-5.26176	1.05166	5.63599e-07	4.16392e-06
ZMAT5	170.894	-4.5183	0.903365	5.6846e-07	4.19773e-06
[truncated: 12,756 more rows]

## Sheet: Table S5
Supplementary Table 5. Differentially regulated pathways in TLE1-low and TLE1-high NKTCL tumor samples
NAME	NES	ES	NOM p-val	FDR q-val	FWER p-val	RANK AT MAX	LEADING EDGE
HALLMARK_MYC_TARGETS_V1	4.71	0.73	0	0	0	2598	tags=77%, list=18%, signal=92%
HALLMARK_E2F_TARGETS	4.43	0.73	0	0	0	3243	tags=84%, list=22%, signal=106%
HALLMARK_G2M_CHECKPOINT	4.14	0.64	0	0	0	2561	tags=65%, list=17%, signal=78%
HALLMARK_MYC_TARGETS_V2	3.52	0.7	0	0	0	3196	tags=84%, list=22%, signal=107%
HALLMARK_MTORC1_SIGNALING	2.65	0.42	0	0	0	2762	tags=45%, list=19%, signal=54%
HALLMARK_OXIDATIVE_PHOSPHORYLATION	2.62	0.43	0	0	0	3077	tags=47%, list=21%, signal=59%
HALLMARK_UNFOLDED_PROTEIN_RESPONSE	2.31	0.4	0	0	0	3526	tags=49%, list=24%, signal=63%
HALLMARK_DNA_REPAIR	2.24	0.37	0	0	0	4100	tags=52%, list=28%, signal=71%
HALLMARK_SPERMATOGENESIS	1.74	0.33	0	0.003	0.007	2387	tags=38%, list=16%, signal=45%
HALLMARK_FATTY_ACID_METABOLISM	1.57	0.26	0	0.011	0.041	2762	tags=32%, list=19%, signal=39%
HALLMARK_MITOTIC_SPINDLE	1.49	0.24	0	0.017	0.071	3777	tags=40%, list=26%, signal=53%
HALLMARK_PI3K_AKT_MTOR_SIGNALING	1.22	0.22	0.078	0.105	0.392	3737	tags=38%, list=25%, signal=50%

## Sheet: Table S6
Supplementary Table 6. Differentially regulated genes in NK-S1 cell line following BCV treatment
Gene	baseMean	log2FoldChange	lfcSE	stat	pvalue	padj
MAP1A	66.6743	2.39051	0.286928	8.33137	7.9911e-17	9.83225e-13
FAR2	150.399	1.63688	0.202533	8.08204	6.36901e-16	3.91822e-12
ICMT-DT	108.588	1.6469	0.221073	7.4496	9.36203e-14	3.83968e-10
MPZ	46.3058	2.27956	0.308122	7.39823	1.38016e-13	4.24538e-10
KIF24	198.427	2.03723	0.284315	7.16541	7.75558e-13	1.90849e-09
CCL4	57.9856	2.78134	0.393527	7.06772	1.57497e-12	2.49824e-09
E2F7	275.119	1.83476	0.259369	7.07392	1.50622e-12	2.49824e-09
KATNAL1	187.646	1.63136	0.230958	7.06344	1.62434e-12	2.49824e-09
CCDC15	176.54	2.16077	0.307993	7.01563	2.28907e-12	2.64937e-09
GPR19	258.087	1.41026	0.201154	7.01086	2.36858e-12	2.64937e-09
KANK2	211.698	1.75877	0.250465	7.02199	2.18733e-12	2.64937e-09
SAMD9L	176.826	1.8229	0.271578	6.71226	1.91629e-11	1.96484e-08
ESYT2	2057.75	1.02273	0.156516	6.53435	6.38877e-11	6.04673e-08
CCDC88B	212.584	1.74687	0.267857	6.52167	6.9529e-11	6.1106e-08
EIF2A	1052.63	-1.4274	0.220505	-6.47334	9.58583e-11	7.86294e-08
NAA25	710.284	-0.789759	0.124946	-6.3208	2.60214e-10	2.00105e-07
H3C11	651.575	-1.25276	0.198698	-6.30487	2.88439e-10	2.08762e-07
ERMARD	111.958	-1.14041	0.182604	-6.24526	4.23089e-10	2.86888e-07
H3C10	2524.73	-1.89556	0.30387	-6.23806	4.43017e-10	2.86888e-07
TGM5	63.9866	1.54877	0.248674	6.22812	4.72066e-10	2.90415e-07
LPAR6	3139.94	-1.51954	0.248945	-6.10394	1.03487e-09	6.06333e-07
KYAT3	382.131	-1.03761	0.170973	-6.06886	1.28824e-09	7.2048e-07
BRME1	127.186	2.19896	0.363167	6.05497	1.40446e-09	7.51328e-07
NFE2L3	592.389	-1.11947	0.186078	-6.01613	1.78642e-09	9.15836e-07
H2AC16	704.506	-1.58342	0.265565	-5.96243	2.48516e-09	1.18837e-06
LAMP3	224.403	0.848932	0.142741	5.94734	2.72529e-09	1.18837e-06
NEDD4	202.941	1.23273	0.207309	5.94634	2.74197e-09	1.18837e-06
SLC25A42	188.254	1.00174	0.168562	5.94286	2.80094e-09	1.18837e-06
SNX5	1731.75	-0.590774	0.0992854	-5.95026	2.67711e-09	1.18837e-06
SYK	115.421	1.55669	0.262287	5.93506	2.93737e-09	1.20471e-06
AKAP5	282.785	1.80382	0.304663	5.9207	3.20578e-09	1.27239e-06
H2BC12	3193.88	-1.68998	0.28827	-5.86249	4.55985e-09	1.75326e-06
TMEM140	34.4019	2.24136	0.385841	5.80903	6.2836e-09	2.34283e-06
BRIP1	323.556	1.76598	0.30452	5.79924	6.66155e-09	2.3691e-06
PHLDB2	344.879	1.14993	0.198355	5.7973	6.73914e-09	2.3691e-06
IKZF2	43.3418	2.48635	0.429897	5.78359	7.31224e-09	2.49916e-06
SNHG4	477.366	-1.09078	0.188773	-5.77827	7.54708e-09	2.50971e-06
FSD1L	319.651	0.993572	0.172527	5.75893	8.46464e-09	2.74076e-06
FXYD2	63.4297	1.82452	0.317655	5.7437	9.26311e-09	2.77984e-06
PRRG4	58.7169	1.92513	0.335161	5.74389	9.25238e-09	2.77984e-06
RAB15	368.093	1.7197	0.299359	5.74461	9.21349e-09	2.77984e-06
EIF4A2	4118.96	-0.668994	0.116591	-5.73794	9.58355e-09	2.80752e-06
ADAL	201.246	1.09618	0.191247	5.73177	9.93891e-09	2.84391e-06
H1-4	6420.75	-1.88247	0.329789	-5.70811	1.14239e-08	3.18842e-06
PIF1	214.901	-1.26223	0.221266	-5.70461	1.16611e-08	3.18842e-06
TREML2	68.1622	1.35864	0.238732	5.69109	1.26231e-08	3.3764e-06
FANCI	2194.58	0.994365	0.175829	5.65528	1.55592e-08	3.91476e-06
GPC1	108.481	1.4709	0.260109	5.65494	1.55903e-08	3.91476e-06
SANBR	297.986	1.26442	0.223526	5.65669	1.54317e-08	3.91476e-06
ZNF629	71.367	1.84248	0.32991	5.58479	2.33986e-08	5.75794e-06
CBX2	708.612	0.972008	0.174482	5.57081	2.53559e-08	5.88641e-06
CLSPN	1468.96	1.18561	0.212733	5.57322	2.50079e-08	5.88641e-06
ZFYVE19	291.616	1.08526	0.194692	5.57422	2.48636e-08	5.88641e-06
TLR1	19.9011	3.15348	0.566551	5.56609	2.6052e-08	5.93599e-06
H1-2	7488.59	-1.81858	0.332535	-5.46883	4.53019e-08	1.01344e-05
COPS2	1008.17	-0.857108	0.157524	-5.44112	5.29466e-08	1.16331e-05
POLD3	854.243	1.31022	0.241023	5.43608	5.44655e-08	1.17569e-05
HEMGN	28.0198	3.96583	0.731842	5.41897	5.9944e-08	1.22925e-05
KAT8	349.343	-1.06602	0.196519	-5.42455	5.81018e-08	1.22925e-05
RRM2	4451.3	1.21245	0.223653	5.42112	5.92278e-08	1.22925e-05
ENPP4	161.742	0.968778	0.178878	5.41587	6.09914e-08	1.23023e-05
TTPAL	349.049	0.992549	0.18389	5.39751	6.7571e-08	1.34096e-05
ATP6V1G2-DDX39B	33.7668	3.18922	0.591681	5.3901	7.04183e-08	1.35379e-05
TCF19	1396.49	1.52829	0.283534	5.39016	7.03958e-08	1.35379e-05
TMEM154	74.9854	1.54864	0.287598	5.38475	7.2547e-08	1.37326e-05
ELP2	1090.39	-0.673194	0.125218	-5.37619	7.60798e-08	1.41831e-05
KIF20A	955.037	-1.19915	0.223718	-5.36009	8.31787e-08	1.52751e-05
RBSN	228.527	-1.12257	0.209692	-5.35339	8.63197e-08	1.56188e-05
LINC02228	22.0125	2.63096	0.491839	5.34923	8.83293e-08	1.57508e-05
CUEDC1	27.588	4.30894	0.806772	5.34097	9.24511e-08	1.57989e-05
LINC02694	22.8063	2.88314	0.539595	5.34315	9.1346e-08	1.57989e-05
STOX1	141.219	1.02765	0.192401	5.34119	9.23376e-08	1.57989e-05
TCERG1	1265.26	-0.614523	0.115273	-5.33103	9.76586e-08	1.64602e-05
GTF3C3	793.409	-0.535886	0.100573	-5.32833	9.91177e-08	1.64803e-05
EIF3J	499.975	-0.983213	0.18513	-5.31094	1.0906e-07	1.78917e-05
E2F2	1850.82	1.52683	0.290518	5.25554	1.4759e-07	2.38204e-05
RAD51D	312.498	1.08703	0.206908	5.2537	1.49071e-07	2.38204e-05
ANK1	18.3254	3.51035	0.669148	5.246	1.55433e-07	2.43294e-05
H2AC18	5428.76	-1.69313	0.322802	-5.24508	1.56211e-07	2.43294e-05
CENPO	689.053	1.2814	0.244576	5.23926	1.61218e-07	2.44893e-05
HERC6	196.979	1.4105	0.269174	5.24008	1.60506e-07	2.44893e-05
TDRD3	233.137	-0.796742	0.152404	-5.22783	1.71513e-07	2.57353e-05
H2AC6	2576.82	-1.46382	0.280178	-5.2246	1.74534e-07	2.58732e-05
SDAD1	730.336	-0.630321	0.120979	-5.21015	1.88689e-07	2.76385e-05
DCUN1D3	157.681	1.02306	0.196854	5.19705	2.02479e-07	2.93094e-05
CDC42EP3	300.776	0.754025	0.145372	5.18688	2.13849e-07	2.99e-05
DMC1	126.417	1.21253	0.23376	5.18708	2.13618e-07	2.99e-05
H2BC11	2652.77	-2.02906	0.391004	-5.18938	2.10999e-07	2.99e-05
EPHA4	28.8575	2.38188	0.459991	5.17808	2.24175e-07	3.09916e-05
NPM1P27	313.361	-1.27424	0.246225	-5.17511	2.27779e-07	3.11399e-05
KLHL22	236.079	1.13663	0.22093	5.14476	2.67859e-07	3.62169e-05
FARP1	75.4127	1.46238	0.285256	5.12653	2.95124e-07	3.90452e-05
INTS7	623.161	0.614057	0.119764	5.12722	2.94052e-07	3.90452e-05
C15orf48	56.4292	2.75418	0.53808	5.11853	3.0793e-07	4.00225e-05
SPC25	147.678	1.32791	0.259466	5.11786	3.09016e-07	4.00225e-05
SLC4A4	160.495	0.964628	0.188559	5.11578	3.1244e-07	4.00445e-05
H2BC6	659.456	-1.83712	0.359461	-5.11076	3.20863e-07	4.02847e-05
NAGK	92.5016	1.72232	0.336975	5.11113	3.20244e-07	4.02847e-05
TAF1D	999.495	-0.708807	0.139474	-5.08201	3.73454e-07	4.64139e-05
H1-3	3787.77	-2.1857	0.431203	-5.06884	4.00246e-07	4.88553e-05
H4C9	1725.6	-1.5877	0.313251	-5.06846	4.01039e-07	4.88553e-05
RSL24D1	2467.53	-1.10795	0.218975	-5.05973	4.19853e-07	5.06458e-05
PINK1	544.012	0.870605	0.172755	5.03954	4.66653e-07	5.57447e-05
EXO5	91.7325	1.19557	0.237639	5.03103	4.87858e-07	5.72171e-05
ILF3-DT	156.243	-0.990531	0.196891	-5.03086	4.8828e-07	5.72171e-05
GLIPR1	52.766	1.68662	0.336111	5.01803	5.22049e-07	6.04828e-05
LTBP1	330.44	0.969748	0.193308	5.01658	5.2598e-07	6.04828e-05
RPL12	10645.7	-0.646759	0.129119	-5.00901	5.47098e-07	6.23286e-05
H2BC17	1226.1	-1.64752	0.329849	-4.99477	5.89052e-07	6.64926e-05
TTN	55.6824	2.67341	0.536349	4.98446	6.21354e-07	6.95013e-05
APCDD1L-DT	23.885	2.13564	0.428813	4.98035	6.34678e-07	7.0352e-05
FAM111A	1406.47	0.997228	0.200387	4.97651	6.47405e-07	7.11221e-05
H2BC21	1934.86	-1.4428	0.290412	-4.96811	6.76095e-07	7.29708e-05
POLQ	1104.69	1.0102	0.203287	4.96933	6.7185e-07	7.29708e-05
LIG3	600.678	-0.951055	0.191571	-4.96451	6.88735e-07	7.36887e-05
ID3	367.514	2.37273	0.479107	4.9524	7.33047e-07	7.77535e-05
SUSD1	244.515	0.958269	0.193778	4.94518	7.6074e-07	8.00012e-05
TP53BP1	766.008	0.938935	0.190665	4.92454	8.45611e-07	8.81728e-05
KNSTRN	626.43	-0.935332	0.190057	-4.92132	8.59604e-07	8.88787e-05
ELP3	724.408	-0.972399	0.198484	-4.89912	9.6265e-07	9.87037e-05
OGFRP1	51.3442	1.48858	0.304281	4.89211	9.97615e-07	0.000101443
STK17A	1494.69	-0.625606	0.128044	-4.88586	1.02978e-06	0.000103856
CALB2	634.093	-2.03193	0.416192	-4.88221	1.04904e-06	0.000104938
CDPF1	84.2672	-1.09093	0.224049	-4.86915	1.12077e-06	0.000110036
MYC	2179.92	-1.42105	0.291912	-4.86809	1.12683e-06	0.000110036
TUBA3FP	44.6894	3.40455	0.699131	4.86969	1.11776e-06	0.000110036
ADI1	877.193	1.28806	0.265511	4.85125	1.22686e-06	0.000118534
ITPRID2	366.264	0.714835	0.147381	4.85024	1.23312e-06	0.000118534
CENATAC-DT	28.8844	2.96708	0.612315	4.84568	1.2618e-06	0.000118793
CPTP	183.4	1.14612	0.236419	4.84784	1.24815e-06	0.000118793
DDIT4	2771.96	-0.825843	0.170499	-4.8437	1.27444e-06	0.000118793
DYNC2H1	36.9041	2.34297	0.483699	4.84386	1.27344e-06	0.000118793
EPHB6	24.3257	2.11889	0.438547	4.83161	1.35435e-06	0.000125293
ZNF93	148.78	1.81778	0.376358	4.82992	1.36586e-06	0.000125414
H2BC13	983.826	-2.0253	0.421413	-4.80597	1.54004e-06	0.00014036
OSGEPL1	77.9235	-1.40978	0.293568	-4.80221	1.56922e-06	0.000141968
MRRF	412.088	-0.734567	0.153115	-4.7975	1.60658e-06	0.000144041
SDHAF4	137.178	-1.03352	0.215478	-4.79639	1.61554e-06	0.000144041
NOA1	624.654	-0.907735	0.189781	-4.78306	1.72643e-06	0.00015282
PSMC3IP	127.058	1.74583	0.365662	4.77442	1.80224e-06	0.000158391
NRXN2	42.8345	2.64618	0.55622	4.75744	1.96062e-06	0.000171089
FRK	35.8072	1.55109	0.326639	4.74863	2.04798e-06	0.000177453
USP37	1000.07	1.07501	0.22677	4.74052	2.13169e-06	0.000183415
HELLS	2621.99	0.99818	0.21067	4.73812	2.15708e-06	0.00018431
H2BC7	759.621	-1.42036	0.300368	-4.72873	2.25928e-06	0.000191712
JAML	12.1567	3.33001	0.704483	4.72688	2.27995e-06	0.000192141
CRLF3	1532.42	-1.21515	0.257313	-4.72245	2.33023e-06	0.000192424
SCN8A	84.5843	1.49506	0.316541	4.72313	2.32241e-06	0.000192424
SLC10A3	402.506	1.20876	0.255824	4.72497	2.30146e-06	0.000192424
PPP2R3C	440.46	-0.710344	0.150507	-4.71966	2.36241e-06	0.00019378
H2AC13	2167.03	-1.65479	0.35089	-4.71599	2.40532e-06	0.000195994
TRIM13	462.398	-0.806098	0.171008	-4.71379	2.43147e-06	0.000196821
ARHGAP19	919.722	-0.944522	0.200692	-4.70632	2.52225e-06	0.000197525
DNASE1L1	237.172	1.04413	0.221726	4.70911	2.48802e-06	0.000197525
H2BC14	660.326	-2.02486	0.430242	-4.70632	2.52232e-06	0.000197525
PHTF1	187.986	0.971767	0.206532	4.70517	2.53648e-06	0.000197525
UBE2A	326.418	0.60558	0.128557	4.71061	2.46972e-06	0.000197525
XPOT	3741.93	-0.809038	0.17186	-4.70755	2.5071e-06	0.000197525
MORC2-AS1	25.9598	2.14992	0.457323	4.7011	2.5877e-06	0.000200245
RGL1	61.5489	1.27858	0.272769	4.68739	2.76715e-06	0.0002126
RTL3	29.897	1.60178	0.341801	4.6863	2.78191e-06	0.0002126
FAM72C	144.004	-1.31873	0.281683	-4.68162	2.84617e-06	0.000214842
LRRC63	38.0395	2.12928	0.454764	4.68217	2.83849e-06	0.000214842
GPR176	174.319	1.08925	0.232971	4.67547	2.93279e-06	0.000219412
LUZP1	835.54	1.10449	0.236264	4.6748	2.94238e-06	0.000219412
CEP19	218.953	0.795003	0.170207	4.67079	3.00038e-06	0.000222389
LINC01128	207.141	1.06428	0.228899	4.64958	3.3262e-06	0.000245063
HES6	166.215	1.23604	0.266109	4.64488	3.40273e-06	0.00024921
EXO1	968.034	1.51999	0.328938	4.62092	3.82043e-06	0.000278146
ATF4	3848.08	-0.723862	0.15671	-4.61911	3.85393e-06	0.000278934
PICK1	137.816	1.22205	0.265055	4.61054	4.01622e-06	0.00028898
SUCLG2	964.483	-0.992625	0.21537	-4.60892	4.04763e-06	0.000289547
FAM161B	53.9778	1.38538	0.301158	4.60019	4.22107e-06	0.000299871
H2AC8	1949.29	-1.65352	0.359521	-4.59922	4.2407e-06	0.000299871
ORMDL3	622.763	0.536592	0.116803	4.59399	4.34855e-06	0.00030574
H2AC25	636.93	-1.50753	0.329018	-4.58192	4.60727e-06	0.00032209
MARS1	3217.6	-0.665572	0.1454	-4.57753	4.70501e-06	0.000327064
ESCO2	1075	1.42081	0.310677	4.57325	4.80206e-06	0.000330081
YBX3	1927.36	-0.725892	0.158722	-4.57336	4.79956e-06	0.000330081
TATDN1	172.181	-0.963064	0.211216	-4.55961	5.12489e-06	0.000350315
BICDL1	456.652	0.739148	0.162397	4.55148	5.32693e-06	0.000358356
CDC20	747.322	-0.737855	0.162146	-4.55057	5.35007e-06	0.000358356
ESRP1	29.0129	2.70525	0.594531	4.55022	5.35903e-06	0.000358356
GCH1	594.886	0.794734	0.174567	4.55261	5.29832e-06	0.000358356
MZB1	359.196	-0.78511	0.172688	-4.5464	5.457e-06	0.000362935
ATP8B2	148.726	0.984823	0.217535	4.5272	5.97709e-06	0.000383878
CENPU	1109.16	1.48673	0.328425	4.52685	5.98693e-06	0.000383878
DHPS	374.184	-0.941018	0.207643	-4.5319	5.84557e-06	0.000383878
FN1	317.096	1.05927	0.23397	4.52739	5.9716e-06	0.000383878
NTRK2	169.949	0.868729	0.191724	4.53115	5.86641e-06	0.000383878
PGM2L1	193.021	1.29057	0.284765	4.53205	5.84127e-06	0.000383878
ZC3H15	1058.69	-0.750533	0.1658	-4.52673	5.9903e-06	0.000383878
CSK	887.728	-0.834346	0.184379	-4.52517	6.03474e-06	0.000384723
GPR137C	67.0306	1.81721	0.402049	4.51988	6.18758e-06	0.000392269
TUBB2A	113.762	1.91446	0.423659	4.51888	6.21687e-06	0.000392269
TAOK3	1305.73	-0.60395	0.133686	-4.51767	6.25247e-06	0.000392502
IL22RA1	57.5227	1.26634	0.280404	4.51614	6.29767e-06	0.000393333
SGK3	118.517	1.03851	0.230159	4.51217	6.41681e-06	0.00039875
SFXN5	172.034	1.25251	0.277758	4.50935	6.5027e-06	0.000402056
E2F8	754.517	1.35597	0.301404	4.49883	6.83274e-06	0.00042035
LACC1	280.894	1.00562	0.223676	4.49586	6.9288e-06	0.000422039
USP7	1514.83	-1.06757	0.237446	-4.49607	6.92223e-06	0.000422039
E2F1	715.443	1.46367	0.326256	4.48627	7.24821e-06	0.000438247
NCKAP1L	171.688	1.47795	0.329477	4.48574	7.26613e-06	0.000438247
EFCAB2	29.4935	2.23787	0.4992	4.48291	7.3633e-06	0.000438617
HCN3	29.7885	2.18342	0.487026	4.48317	7.35425e-06	0.000438617
SLC66A1	141.663	1.23108	0.274645	4.48245	7.3792e-06	0.000438617
COL16A1	26.883	3.34803	0.748198	4.47479	7.64852e-06	0.000450275
SYNJ2BP	26.1244	1.76717	0.394908	4.47489	7.64495e-06	0.000450275
KIFC2	415.905	1.62789	0.363972	4.47256	7.72877e-06	0.000452832
INTS11	831.446	-0.575592	0.128812	-4.46848	7.87762e-06	0.000459366
HERC5	864.063	0.552879	0.12387	4.46337	8.06808e-06	0.000468253
FNIP2	80.6121	1.10945	0.248945	4.45662	8.32604e-06	0.000480956
COQ8A	698.121	-0.637993	0.143517	-4.44541	8.77249e-06	0.000504377
GNAZ	87.4429	1.36628	0.307531	4.44274	8.88188e-06	0.000506773
ZFHX3-AS1	75.6135	1.86223	0.419196	4.44239	8.89654e-06	0.000506773
SGK1	98.062	1.46958	0.331604	4.43174	9.3477e-06	0.000527587
TMTC1	22.189	2.56593	0.578942	4.43211	9.33145e-06	0.000527587
AKAP1-DT	68.1844	1.58833	0.359331	4.42025	9.85876e-06	0.000553755
SPOCK2	14.2546	2.91446	0.659483	4.41932	9.90133e-06	0.000553755
IFNG	44.2558	1.89735	0.430021	4.41223	1.02312e-05	0.000569616
MTIF3	171.115	-0.895613	0.203323	-4.40489	1.05839e-05	0.000586597
CYSRT1	28.3203	1.64507	0.373682	4.40233	1.07093e-05	0.000590885
CADM1	116.326	1.09796	0.249863	4.39427	1.11148e-05	0.00061052
L3MBTL2-AS1	14.5934	4.19912	0.956606	4.38961	1.13555e-05	0.000620971
C2orf15	22.1826	1.83318	0.417963	4.38599	1.15462e-05	0.00062309
MYO3B	20.0114	2.40401	0.547925	4.38747	1.14675e-05	0.00062309
UTP25	346.286	-0.685949	0.156376	-4.38653	1.15171e-05	0.00062309
EPRS1	4192.42	-0.725246	0.165443	-4.38366	1.16699e-05	0.000627018
CCNE2	945.741	1.8524	0.42324	4.3767	1.20488e-05	0.000641769
NPM1	12543.3	-1.09116	0.249304	-4.37682	1.20425e-05	0.000641769
RAD21	9554.79	-0.677735	0.154982	-4.37298	1.22564e-05	0.000650012
DDX21	3278.59	-0.810485	0.185621	-4.36633	1.26349e-05	0.000667164
OAS3	647.41	0.773256	0.177132	4.36541	1.26883e-05	0.000667164
FGD5-AS1	1336.68	0.815229	0.186819	4.36374	1.27855e-05	0.000669418
TTYH2	347.489	0.897428	0.20618	4.35264	1.34509e-05	0.000701269
EIF3E	3365.26	-0.993746	0.228889	-4.34161	1.41441e-05	0.000734297
IRF4	1353.02	0.630198	0.145232	4.33925	1.42967e-05	0.000739106
SLC7A5	2665.06	-0.569294	0.131226	-4.33829	1.43595e-05	0.000739245
DDX59	321.701	-0.720405	0.166223	-4.33396	1.46451e-05	0.000750806
KLRC1	7259.42	-0.74718	0.172533	-4.33066	1.48663e-05	0.000755849
NNT-AS1	340.449	0.688492	0.158962	4.33116	1.48326e-05	0.000755849
GPSM1	151.835	1.01994	0.235787	4.32568	1.52059e-05	0.000766775
ZNF22-AS1	54.137	1.28087	0.29605	4.32655	1.51466e-05	0.000766775
LDB2	185.242	-1.38691	0.320716	-4.32442	1.52936e-05	0.000768049
MAP3K12	163.107	0.908851	0.210533	4.3169	1.58237e-05	0.000791442
CCDC150	170.38	1.91308	0.443419	4.31438	1.60055e-05	0.000797293
NETO2	137.117	0.855558	0.198527	4.30954	1.63593e-05	0.000805616
SHCBP1	383.734	0.678997	0.157562	4.30941	1.6369e-05	0.000805616
ZNF367	524.553	1.36265	0.316129	4.31042	1.62948e-05	0.000805616
ST7	126.841	1.00681	0.233838	4.30558	1.66546e-05	0.000816407
KRT8	75.4125	1.38584	0.322252	4.30049	1.7042e-05	0.000832082
ACTR3C	51.6617	1.55096	0.360737	4.2994	1.71258e-05	0.000832868
DCPS	254.481	-0.763316	0.177638	-4.29704	1.73094e-05	0.000838481
AMN1	50.664	-1.12144	0.261202	-4.29337	1.75984e-05	0.000844131
DNAJC7	772.72	-0.66382	0.154627	-4.29304	1.76246e-05	0.000844131
MTCL1	140.279	1.25303	0.291928	4.29226	1.76864e-05	0.000844131
TMC6	1167.49	-0.725187	0.168959	-4.29208	1.77004e-05	0.000844131
HMMR	1365.98	-0.658825	0.153648	-4.2879	1.8037e-05	0.00085686
DPY19L2P2	17.1585	3.05072	0.711983	4.28482	1.82888e-05	0.00086548
MRPL58	349.019	-1.05744	0.247019	-4.28081	1.86218e-05	0.000877865
TOMM70	1715.44	-0.714909	0.167079	-4.27886	1.87855e-05	0.000878847
ZSWIM3	108.098	0.840861	0.196491	4.27938	1.87416e-05	0.000878847
CXCR4	254.065	1.34595	0.314927	4.27384	1.92138e-05	0.00089548
NFATC2IP	516.351	0.896407	0.209836	4.27195	1.93773e-05	0.00089969
H2AC17	1603.18	-1.0018	0.234721	-4.26806	1.97182e-05	0.000911548
PIGR	25.2987	2.27844	0.533923	4.26735	1.97808e-05	0.000911548
BRCA2	1790.7	0.999237	0.234398	4.26299	2.01713e-05	0.000915821
NIBAN1	1390.72	0.869058	0.203856	4.26311	2.01605e-05	0.000915821
RPL19	8754.16	-0.633519	0.148565	-4.26424	2.0058e-05	0.000915821
VWA5B2	33.9228	1.76338	0.413622	4.26325	2.01471e-05	0.000915821
MROH1	205.931	1.59536	0.374601	4.25881	2.05515e-05	0.000929653
ZCRB1	420.25	-0.646644	0.152028	-4.25344	2.10509e-05	0.000948755
BRCA1	1323.92	0.948822	0.223207	4.25086	2.12949e-05	0.000952774
FAM111B	857.463	2.62351	0.617122	4.25121	2.12623e-05	0.000952774
UCHL5	789.762	-0.737021	0.173824	-4.24004	2.23479e-05	0.000992665
VARS1	840.074	-0.928329	0.218922	-4.24047	2.23055e-05	0.000992665
CCDC69	356.016	-0.908851	0.214544	-4.23621	2.27329e-05	0.00100613
NCKIPSD	487.519	0.704478	0.166386	4.23399	2.29578e-05	0.00101245
NSMCE1	388.395	-0.765017	0.18109	-4.22452	2.39449e-05	0.0010508
PLEKHH3	177.741	1.00638	0.238251	4.22402	2.39983e-05	0.0010508
PIDD1	183.933	1.44671	0.342889	4.21918	2.45197e-05	0.00106983
NOP14	799.445	-0.645519	0.153029	-4.21828	2.46177e-05	0.0010703
LIMK2	393.966	0.899289	0.213416	4.21377	2.51138e-05	0.00108803
RNF169	634.254	-0.741858	0.176102	-4.21267	2.52367e-05	0.00108952
SMYD4	454.037	1.23712	0.293773	4.21115	2.54073e-05	0.00109305
PLEK	16.8871	2.19533	0.521866	4.20669	2.59136e-05	0.00111094
BAD	290.073	0.95726	0.227725	4.20359	2.62716e-05	0.00112051
VAMP8	27.243	1.67229	0.397862	4.20318	2.63188e-05	0.00112051
CXCL10	18.0356	4.5462	1.08238	4.20019	2.66688e-05	0.00112492
CYP2U1-AS1	23.8961	2.86261	0.681582	4.19996	2.66967e-05	0.00112492
GBA1LP	89.8912	1.53005	0.364171	4.20146	2.65197e-05	0.00112492
IP6K1	464.967	0.623217	0.148598	4.19397	2.74117e-05	0.0011511
MHENCR	134.756	-0.998483	0.238128	-4.19305	2.7523e-05	0.00115185
DRAM2	244.683	-0.913328	0.218141	-4.18688	2.8282e-05	0.0011796
LBH	735.74	0.701633	0.167649	4.18514	2.84992e-05	0.00118464
STRIP2	181.359	1.37434	0.328901	4.17858	2.93335e-05	0.00121522
CEP162	125.723	1.0427	0.24963	4.17699	2.95398e-05	0.00121966
LRRC45	438.479	1.08424	0.259833	4.17284	3.00826e-05	0.00122969
RFWD3	2167.61	0.785325	0.188171	4.17346	3.00007e-05	0.00122969
TUBA1A	906.772	1.1015	0.263885	4.17418	2.99061e-05	0.00122969
HCFC2	408.103	0.792149	0.189904	4.17131	3.02858e-05	0.00123389
MICALL2	33.4479	2.07722	0.498866	4.16388	3.12889e-05	0.00126638
ZNF584	58.3513	1.0889	0.261491	4.16419	3.12461e-05	0.00126638
LINC00205	138.456	0.969484	0.232993	4.161	3.16856e-05	0.00127823
ARHGEF11	22.8691	2.26842	0.545807	4.15609	3.23742e-05	0.00127954
FAM53C	915.341	1.21582	0.292447	4.15741	3.21879e-05	0.00127954
RABEP2	154.747	1.02416	0.246193	4.15997	3.18284e-05	0.00127954
SBNO1	1995.11	-0.847564	0.203968	-4.15538	3.24746e-05	0.00127954
SLF2	1090.36	0.655522	0.157767	4.15499	3.25299e-05	0.00127954
SNHG11	129.865	1.16932	0.281457	4.15453	3.25956e-05	0.00127954
TMEM44	98.2077	0.952265	0.229234	4.15412	3.2654e-05	0.00127954
TOMM20	973.462	-1.07002	0.257401	-4.157	3.22459e-05	0.00127954
ZBP1	32.7025	1.80362	0.433667	4.15899	3.19659e-05	0.00127954
RHOT1	833.457	-0.779742	0.187738	-4.15335	3.27645e-05	0.00127979
C19orf47	138.47	1.27258	0.306524	4.15165	3.30087e-05	0.00128384
FOXM1	1355.85	0.770539	0.185684	4.14974	3.32856e-05	0.00128384
H2AC7	2998.68	-1.31293	0.316373	-4.14995	3.32544e-05	0.00128384
USP11	98.5494	1.11946	0.269686	4.15097	3.31063e-05	0.00128384
EOGT	251.527	0.706807	0.170521	4.14498	3.39848e-05	0.00130656
TNFRSF4	290.534	-0.862138	0.20803	-4.14429	3.40869e-05	0.00130656
EVI2A	1428.21	-0.788407	0.190302	-4.14292	3.42908e-05	0.00131029
N6AMT1	27.4687	-1.38795	0.33512	-4.14164	3.44829e-05	0.00131355
AMBRA1	154.559	1.05222	0.254158	4.14004	3.47249e-05	0.00131869
SMIM20	155.383	-0.731781	0.176998	-4.1344	3.55877e-05	0.00134729
SYTL2	629.574	1.29355	0.313015	4.13253	3.58784e-05	0.00135414
S100B	141.673	0.898093	0.217362	4.13178	3.59964e-05	0.00135444
RFX2	50.8865	1.38652	0.33566	4.13072	3.61625e-05	0.0013545
SDC4	124.168	0.777375	0.188241	4.12967	3.63284e-05	0.0013545
TMC8	1004.21	-0.902837	0.218592	-4.13023	3.62399e-05	0.0013545
CCDC14	446.234	1.00213	0.242837	4.12673	3.67951e-05	0.00136775
AMDHD1	24.338	2.09701	0.508619	4.12294	3.74063e-05	0.00138629
C6orf47	284.758	0.810161	0.196593	4.12101	3.77219e-05	0.00139343
FAM13B	450.429	1.30678	0.317151	4.12038	3.78255e-05	0.00139343
EEF1AKMT2	256.736	-0.643381	0.156227	-4.11824	3.81769e-05	0.00140218
MPP2	50.6273	1.16317	0.282728	4.11411	3.88677e-05	0.0014233
TRAIP	221.942	1.13738	0.27654	4.11288	3.90747e-05	0.00142663
NEMP1	1642.42	0.592931	0.144207	4.11168	3.92797e-05	0.00142831
STYK1	173.75	1.11053	0.27012	4.11125	3.93528e-05	0.00142831
CDC6	1896.46	1.44156	0.351043	4.10651	4.01678e-05	0.00144187
EEF1E1	1074.72	-0.520003	0.126634	-4.10635	4.01953e-05	0.00144187
NLN	799.964	-0.619086	0.150736	-4.10709	4.00668e-05	0.00144187
TBC1D4	146.923	1.21537	0.295973	4.10636	4.01941e-05	0.00144187
ARPC5L	648.626	-0.54749	0.133427	-4.1033	4.07295e-05	0.00145565
UBXN11	94.6649	1.37989	0.336328	4.10281	4.0816e-05	0.00145565
PPP3CB-AS1	84.5478	1.51651	0.370023	4.09843	4.15955e-05	0.0014749
ZGRF1	644.911	0.888919	0.216858	4.09908	4.14797e-05	0.0014749
FN3KRP	238.916	0.781262	0.190696	4.09689	4.18734e-05	0.00147625
H4C12	3455.34	-1.40079	0.341892	-4.09719	4.18197e-05	0.00147625
ATAD5	1621.17	0.733755	0.17916	4.09553	4.21198e-05	0.00147771
DCUN1D5	443.975	-0.566804	0.138422	-4.09475	4.22622e-05	0.00147771
DTL	1437.71	1.22507	0.299186	4.09468	4.22752e-05	0.00147771
SLC16A3	450.291	0.803512	0.196327	4.09272	4.26338e-05	0.00148602
MELTF	45.882	1.47992	0.361848	4.08989	4.31583e-05	0.0014982
ZNF25	180.319	-0.907643	0.221944	-4.08952	4.32266e-05	0.0014982
DPP4	3413.52	-0.700072	0.171249	-4.08803	4.35044e-05	0.00150359
RTL6	442.595	0.624205	0.152878	4.08303	4.44522e-05	0.00153204
EMC2	183.272	-0.781898	0.191589	-4.08112	4.48192e-05	0.00154022
WDR90	268.359	1.57359	0.385638	4.0805	4.49397e-05	0.00154022
LINC03072	82.5008	1.47347	0.361206	4.0793	4.5171e-05	0.00154384
H4C2	1473.11	-1.23102	0.301887	-4.07776	4.54711e-05	0.00154714
SF3B1	5192.26	-0.498064	0.122149	-4.07752	4.5519e-05	0.00154714
CENPI	223.767	1.13007	0.277278	4.07557	4.59018e-05	0.00155243
MARCHF3	105.093	1.24636	0.305869	4.0748	4.60532e-05	0.00155243
ZFAND1	600.271	-0.708418	0.173849	-4.07491	4.6033e-05	0.00155243
H4C5	2140.8	-1.06514	0.261491	-4.07333	4.63447e-05	0.00155375
SLAMF6	20.4712	2.29027	0.562182	4.07389	4.62334e-05	0.00155375
H4C11	2663.6	-1.04361	0.25631	-4.07165	4.66822e-05	0.00156081
HROB	138.886	1.11592	0.274148	4.07052	4.69091e-05	0.00156414
TTLL7	131.028	1.1945	0.293528	4.06945	4.7124e-05	0.00156706
CCHCR1	400.786	1.1646	0.28658	4.0638	4.82796e-05	0.00158554
H2BC26	1199.95	-1.77615	0.436844	-4.06588	4.7852e-05	0.00158554
PLXNA3	228.354	1.95985	0.482173	4.06461	4.81126e-05	0.00158554
RCSD1	1639.96	-0.629536	0.154861	-4.06516	4.79986e-05	0.00158554
SFT2D3	154.828	-0.808094	0.198862	-4.06359	4.8324e-05	0.00158554
MMP24OS	107.633	-0.960683	0.236769	-4.05747	4.96082e-05	0.00161904
ZNF682	112.109	1.1525	0.284034	4.05761	4.95777e-05	0.00161904
SSBP4	482.359	-0.941532	0.232088	-4.05679	4.97524e-05	0.00161945
C17orf49	402.554	-1.05541	0.26044	-4.05243	5.06874e-05	0.00164554
EXOC7	1214.71	0.652798	0.161126	4.05148	5.08945e-05	0.00164791
GPSM2	739.329	-0.766032	0.189137	-4.05015	5.11842e-05	0.00165294
SNHG31	21.3501	1.85604	0.458579	4.04737	5.17955e-05	0.0016683
YARS1	3968.46	-0.85276	0.21075	-4.0463	5.20331e-05	0.00167158
ZNF799	104.097	1.13811	0.281419	4.04417	5.25077e-05	0.00168244
ZWINT	1096.38	1.00693	0.249113	4.04204	5.29884e-05	0.00169343
7SK	335.865	4.98199	1.2332	4.03988	5.34796e-05	0.0017047
ECSIT	243.548	-0.86241	0.21358	-4.03787	5.39379e-05	0.00171486
DDX10	446.077	-0.674877	0.167219	-4.03589	5.4395e-05	0.00172494
DNAJC24	209.796	-0.584148	0.144834	-4.03321	5.50193e-05	0.00174025
CCNE1	299.441	1.58514	0.393162	4.03177	5.53591e-05	0.00174204
TREX1	92.368	1.27513	0.316236	4.03221	5.52543e-05	0.00174204
MSANTD7	708.169	0.963203	0.23899	4.03031	5.57033e-05	0.0017484
PUDP	338.717	-0.925755	0.229782	-4.02884	5.60522e-05	0.00175042
RPL13A	10969	-0.66216	0.164345	-4.02909	5.59934e-05	0.00175042
ENTR1	713.272	-0.757209	0.188052	-4.02659	5.65908e-05	0.00176277
TWNK	243.083	-0.630723	0.156698	-4.02509	5.69531e-05	0.00176957
CEP126	31.0183	1.8165	0.451591	4.02244	5.75985e-05	0.00178512
COL11A2	46.9702	1.88691	0.469675	4.01749	5.88212e-05	0.00181225
IRF7	290.02	1.28067	0.318724	4.01812	5.86643e-05	0.00181225
SINHCAF	2949.32	-0.9094	0.226382	-4.01711	5.89157e-05	0.00181225
AOC1	28.8716	1.84691	0.46016	4.01362	5.97946e-05	0.00183469
FANCL	707.553	0.775326	0.193257	4.0119	6.02331e-05	0.00184355
MINDY1	54.068	1.11426	0.278069	4.00714	6.1458e-05	0.00187637
PTPN6	950.68	-1.17814	0.294077	-4.00624	6.16928e-05	0.00187888
LRRFIP1	1339.07	-0.885424	0.221301	-4.001	6.30767e-05	0.00191156
PALLD	17.5467	2.46158	0.615225	4.00111	6.3046e-05	0.00191156
TBC1D24	324.927	0.777806	0.194509	3.99883	6.36576e-05	0.00192443
H2BC8	2254.93	-1.76791	0.442328	-3.99682	6.41986e-05	0.00193603
BRMS1L	105.966	0.749715	0.187706	3.9941	6.49411e-05	0.00193941
KLRG1	29.6352	-1.47504	0.369179	-3.99547	6.45666e-05	0.00193941
PPCDC	269.47	0.748338	0.187358	3.99415	6.49256e-05	0.00193941
ZNF678	421.722	0.887639	0.222176	3.9952	6.46385e-05	0.00193941
METTL16	492.937	-0.5104	0.127874	-3.99143	6.56763e-05	0.00195661
LETM2	57.5067	1.19493	0.299448	3.99043	6.59546e-05	0.00196016
B4GALNT1	183.27	0.834365	0.20928	3.98683	6.69615e-05	0.00197407
ENKD1	41.5003	1.37041	0.343711	3.9871	6.68852e-05	0.00197407
LYST	231.897	1.17023	0.293432	3.98809	6.66076e-05	0.00197407
SECISBP2	595.59	-0.695309	0.174417	-3.98647	6.70644e-05	0.00197407
DPH5	270.369	-0.669786	0.168198	-3.98213	6.82999e-05	0.00198667
DUSP5	508.89	0.794527	0.199522	3.98216	6.82911e-05	0.00198667
HNRNPR	2095.63	-0.708271	0.177789	-3.98378	6.78278e-05	0.00198667
IFT81	147.429	0.712115	0.178782	3.98314	6.80104e-05	0.00198667
MYBL2	1688.92	1.28993	0.323859	3.98301	6.80488e-05	0.00198667
ICA1L	99.1396	1.49836	0.376416	3.98059	6.87458e-05	0.00199023
ITGA1	24.6783	1.87188	0.470191	3.9811	6.85978e-05	0.00199023
SLC39A10	1062.48	-1.47061	0.369653	-3.97835	6.93944e-05	0.00200429
ATP5MC2	810.457	-0.828717	0.208489	-3.97486	7.04195e-05	0.0020244
GLS	1988.56	-0.490736	0.123459	-3.9749	7.04097e-05	0.0020244
NEDD9	372.242	-0.703263	0.176993	-3.9734	7.08554e-05	0.00203218
PRIMPOL	255.775	0.816646	0.205608	3.97186	7.13125e-05	0.00204053
H2BC5	3087.47	-1.51932	0.382757	-3.9694	7.20529e-05	0.00205217
TKT	2007.14	-1.19223	0.300328	-3.96976	7.1945e-05	0.00205217
GBA1	359.541	0.847847	0.21366	3.96821	7.24157e-05	0.00205774
TLR3	117.979	0.789504	0.199098	3.9654	7.32745e-05	0.00207735
CSF1	224.21	0.851965	0.215072	3.9613	7.45443e-05	0.00210365
ZNF107	739.33	0.747456	0.188669	3.96173	7.44099e-05	0.00210365
RPL36A	1375.11	-0.557913	0.140887	-3.96001	7.49477e-05	0.0021102
NBL1	270.771	0.742598	0.187612	3.95816	7.55295e-05	0.00212172
TBK1	955.204	-0.397409	0.100431	-3.95703	7.58872e-05	0.00212692
PIGM	76.5375	1.00309	0.253644	3.95473	7.66225e-05	0.00214264
PEA15	395.148	0.719658	0.182057	3.95292	7.7204e-05	0.00215401
ZAP70	2167.51	-0.497202	0.125807	-3.9521	7.74688e-05	0.00215651
PLK1	539.082	-0.980961	0.248335	-3.95016	7.81001e-05	0.00216917
RHBDD1	267.225	-1.0351	0.262187	-3.94796	7.88208e-05	0.00218426
PSRC1	146.796	-0.740774	0.187711	-3.94635	7.93526e-05	0.00219405
GNB1L	87.8864	-0.874565	0.22175	-3.94393	8.01576e-05	0.00221134
ALG3	303.684	-0.706826	0.179324	-3.94162	8.09324e-05	0.00221539
H3C3	2694.08	-1.23088	0.312245	-3.94202	8.07976e-05	0.00221539
IGFBP6	56.554	0.966029	0.245076	3.94175	8.08899e-05	0.00221539
LINC00680	100.304	1.41012	0.357777	3.94135	8.10245e-05	0.00221539
CHORDC1	501.683	-0.758137	0.192393	-3.94055	8.12939e-05	0.00221783
FAM72D	138.191	-1.37069	0.347904	-3.93985	8.15332e-05	0.00221943
SNHG33	353.741	0.655315	0.166358	3.93918	8.1759e-05	0.00222067
BCL2L1	554.054	-0.546573	0.138797	-3.93792	8.21912e-05	0.00222749
UBD	7.26617	6.08078	1.54448	3.9371	8.24706e-05	0.00223015
PCDH12	22.5289	2.15823	0.548741	3.93306	8.38702e-05	0.00226302
GDAP1	234.629	1.03113	0.262373	3.93002	8.49401e-05	0.00228688
H2BC18	1629.86	-1.67168	0.425544	-3.92834	8.55346e-05	0.00229785
H3C2	5306.5	-1.0884	0.277179	-3.9267	8.61196e-05	0.00230853
FDXACB1	70.2475	-1.54853	0.394557	-3.92473	8.68261e-05	0.00231972
THAP3	304.545	-0.494661	0.126062	-3.92397	8.71026e-05	0.00231972
UHRF1	1014.77	1.7404	0.443478	3.92443	8.69368e-05	0.00231972
CEP131	337.727	1.23674	0.315301	3.92239	8.76739e-05	0.00232349
GEN1	810.764	0.817168	0.208324	3.92259	8.76019e-05	0.00232349
GINS4	524.49	1.2793	0.326184	3.92202	8.78107e-05	0.00232349
CDKN1A	30.8837	2.01691	0.514496	3.92016	8.84887e-05	0.00233641
RAB23	220.222	0.837903	0.213847	3.91824	8.91997e-05	0.00235014
SPATS2L	148.413	1.01436	0.258929	3.91752	8.94647e-05	0.00235208
MYL5	54.1403	1.43347	0.366273	3.91365	9.09095e-05	0.00238497
LPP-AS2	24.3704	1.9834	0.50711	3.91119	9.18419e-05	0.0024043
FBF1	401.365	1.50442	0.3848	3.90961	9.24439e-05	0.00241493
RYR2	61.837	1.18019	0.302025	3.9076	9.32188e-05	0.00243001
CEP78	1014.47	0.583349	0.149364	3.90556	9.4009e-05	0.00244543
WDR43	1825.46	-0.9197	0.235523	-3.90493	9.42508e-05	0.00244654
DOCK5	123.298	1.57664	0.404084	3.90176	9.54943e-05	0.00247361
NALT1	24.6863	-1.64765	0.422416	-3.90053	9.59812e-05	0.00248099
GARS1	1857.99	-0.787248	0.202194	-3.89353	9.87957e-05	0.00254839
RNMT	503.449	-0.6175	0.158646	-3.89231	9.92956e-05	0.00255059
SLC37A1	167.029	0.748058	0.192175	3.89259	9.91787e-05	0.00255059
DNAJC22	31.2119	1.37409	0.353151	3.89094	9.98547e-05	0.00255961
FAM72A	169.787	-0.927595	0.238484	-3.88956	0.000100428	0.00256895
CDK5R1	209.507	-1.19855	0.308242	-3.88835	0.000100929	0.00257327
MPZL3	778.182	0.795706	0.20465	3.88814	0.000101015	0.00257327
NOB1	342.77	-0.939565	0.241876	-3.88449	0.000102545	0.00260685
RPS27	4434.23	-0.366851	0.0944978	-3.88211	0.000103553	0.00262705
TMPO-AS1	128.399	1.06493	0.274587	3.87829	0.000105194	0.00266319
SLC35E4	133.217	0.748871	0.193326	3.87362	0.00010723	0.00270916
KAT5	305.223	-0.590098	0.152439	-3.87105	0.000108368	0.00273229
EBI3	25.4919	1.73396	0.44802	3.87027	0.000108717	0.00273548
PPA1	2531.67	-0.9905	0.255959	-3.86976	0.000108945	0.00273562
AUH	90.5143	-0.831507	0.215013	-3.86723	0.000110077	0.00274203
EIF4A1	10714.1	-1.08794	0.281421	-3.86587	0.000110694	0.00274203
FAM72B	177.906	-1.07748	0.278571	-3.86786	0.000109793	0.00274203
IFT122P3	23.6681	2.57004	0.664619	3.86694	0.000110209	0.00274203
ITPKA	14.2427	2.37116	0.613227	3.86669	0.000110321	0.00274203
MEI1	42.4325	1.1136	0.288059	3.86588	0.000110692	0.00274203
MTURN	106.371	1.09056	0.282109	3.86572	0.00011076	0.00274203
RABIF	141.522	0.749505	0.193985	3.86373	0.000111671	0.00275903
DAPP1	9.53907	2.96421	0.768029	3.85951	0.000113615	0.00279493
LRPPRC	8271.92	-0.57275	0.148415	-3.8591	0.000113805	0.00279493
MTREX	1315.9	-0.640343	0.165903	-3.85974	0.000113506	0.00279493
CTNS	179.288	0.906253	0.235083	3.85504	0.00011571	0.00280807
DDX11	873.379	1.22902	0.318797	3.85517	0.000115651	0.00280807
HAUS5	659.982	1.07403	0.278512	3.85633	0.000115103	0.00280807
HNRNPA1	5462.56	-0.902889	0.234187	-3.85542	0.00011553	0.00280807
NDOR1	473.889	1.15634	0.299922	3.85549	0.000115498	0.00280807
RPS2	11372.6	-0.715761	0.185576	-3.85697	0.000114802	0.00280807
CDKN2AIP	621.112	0.949053	0.24626	3.85387	0.000116266	0.00281049
KCP	32.4593	1.36659	0.354589	3.854	0.000116205	0.00281049
EIF3D	3298.06	-0.635713	0.165044	-3.85179	0.000117259	0.0028234
RSL1D1	2549.41	-0.78614	0.204084	-3.85204	0.00011714	0.0028234
MBNL1	5239.79	-0.615243	0.159871	-3.84836	0.000118909	0.00285197
TCF12-DT	28.877	1.52424	0.396067	3.84844	0.000118874	0.00285197
FUBP1	1616.2	-0.524038	0.13621	-3.84728	0.000119438	0.00285907
JUN	453.19	4.086	1.06258	3.84535	0.000120381	0.00287049
NMD3	1269.68	-0.560069	0.145644	-3.84545	0.000120331	0.00287049
RTN4IP1	59.9407	-1.02033	0.265414	-3.8443	0.000120899	0.0028717
TRIM26	494.898	0.797611	0.207458	3.84469	0.000120706	0.0028717
DYRK3	264.826	0.894633	0.233069	3.83848	0.000123796	0.00292921
ZCCHC18	34.2137	1.29638	0.337705	3.83879	0.000123643	0.00292921
PLCD3	139.837	0.711363	0.185395	3.83701	0.000124543	0.00294122
HNRNPDL	2317.51	-0.57651	0.150287	-3.83607	0.000125019	0.00294682
RPL17-C18orf32	126.829	-0.671772	0.175247	-3.83329	0.000126442	0.00297464
CENPQ	175.948	0.80215	0.209378	3.83111	0.000127568	0.00299293
H2AC4	1098.23	-1.72186	0.449527	-3.83037	0.000127949	0.00299293
SNAPC3	288.718	-0.635315	0.165853	-3.83059	0.000127836	0.00299293
ADD3	2365.46	0.523106	0.136638	3.82841	0.000128972	0.00301114
BRPF3	299.057	1.55045	0.405125	3.82708	0.000129672	0.00301926
GPR108	385.059	-0.569471	0.148811	-3.82682	0.000129811	0.00301926
H1-5	5472.26	-1.53375	0.400914	-3.82564	0.000130431	0.00302798
ZNF200	242.059	1.06449	0.278321	3.82469	0.000130938	0.00303402
USP6NL	7.68029	5.1717	1.35263	3.82343	0.000131608	0.0030438
PRSS57	473.502	0.717912	0.187887	3.82097	0.000132925	0.00306851
GRAMD1B	212.784	0.848441	0.222143	3.81934	0.000133807	0.00307851
JOSD1	1117.05	0.742709	0.194465	3.81925	0.000133859	0.00307851
BTBD2	452.386	-0.554464	0.14526	-3.81705	0.000135054	0.0031002
TXNL1	324.835	-0.564117	0.147813	-3.81642	0.000135402	0.0031024
BTF3	3588.4	-0.857456	0.224732	-3.81545	0.000135932	0.00310876
STK36	158.548	1.27433	0.334176	3.81334	0.000137101	0.00312967
LINC01814	30.751	1.67847	0.440213	3.81286	0.00013737	0.00312999
NACA	4963.72	-0.770294	0.202552	-3.80294	0.000142987	0.00325195
ABHD3	418.257	0.84843	0.22314	3.80224	0.000143395	0.00325229
CCDC103	9.40962	3.52932	0.92839	3.80155	0.000143794	0.00325229
ETFDH	207.898	-0.702345	0.184746	-3.80169	0.000143712	0.00325229
NCEH1	260.301	0.593122	0.156095	3.79974	0.000144847	0.00325912
SCMH1	161.418	1.00907	0.265562	3.79975	0.000144841	0.00325912
TTLL5	241.152	0.771182	0.202961	3.79967	0.000144891	0.00325912
RPL17	3778.09	-0.70885	0.18666	-3.79754	0.000146137	0.00328114
STON2	29.452	1.63598	0.431169	3.79429	0.000148066	0.00331841
PRELID3B	3355.6	-0.676165	0.17827	-3.79292	0.000148885	0.0033307
PLSCR1	447.373	0.942937	0.248682	3.79173	0.0001496	0.0033406
BTN3A1	398.157	-0.839804	0.221549	-3.7906	0.000150285	0.00334983
SLC7A5P1	38.5396	8.49307	2.24084	3.79012	0.000150574	0.0033502
LINC02321	21.3255	3.39285	0.895498	3.78879	0.000151384	0.00336215
TRAP1	2439.26	-0.923833	0.244011	-3.78603	0.000153075	0.00339357
CHM	357.506	0.629384	0.166325	3.78406	0.00015429	0.00339377
CUL1	2338.93	-0.721905	0.190773	-3.7841	0.000154265	0.00339377
GABPA	195.708	-0.623133	0.164694	-3.78358	0.000154588	0.00339377
KRT10-AS1	18.737	1.9715	0.521221	3.78247	0.000155282	0.00339377
MRPL10	697.781	-0.705301	0.186416	-3.78347	0.000154657	0.00339377
PCK2	671.653	-0.932676	0.246619	-3.78185	0.000155664	0.00339377
RAD51AP1	906.357	0.958963	0.253589	3.78157	0.000155842	0.00339377
RPL37	4666.72	-0.434479	0.114875	-3.78219	0.000155456	0.00339377
TRNT1	647.372	-0.529211	0.139907	-3.78258	0.00015521	0.00339377
VPS4A	542.119	-0.514449	0.136004	-3.78261	0.000155195	0.00339377
EIF4B	6909.93	-0.841035	0.222569	-3.77876	0.00015761	0.00342017
GALM	1967.92	-0.903126	0.238981	-3.77907	0.000157415	0.00342017
TNFRSF9	248.053	0.806984	0.213606	3.7779	0.000158155	0.00342595
MCCC2	1404.45	-0.504565	0.133608	-3.77645	0.000159081	0.00343995
CENPA	365.935	-0.652249	0.172854	-3.77341	0.000161028	0.00346987
SLC6A6	1050.91	-0.921048	0.244072	-3.77368	0.000160856	0.00346987
LEPR	91.7493	-1.77065	0.469414	-3.77204	0.000161916	0.0034829
EME2	169.625	1.20849	0.320596	3.76952	0.000163559	0.00350734
OXA1L	980.529	-0.570038	0.151227	-3.76943	0.000163623	0.00350734
ZNF253	322.554	1.06083	0.281542	3.76791	0.000164619	0.00352256
CD48	3249.91	-1.08884	0.28902	-3.76734	0.000164995	0.00352447
RCC1	1167.32	-0.837259	0.222456	-3.76371	0.000167413	0.00356993
LCMT2	188.869	1.06602	0.283432	3.76114	0.000169144	0.00360059
RBMX	3387.32	-0.520726	0.138497	-3.75982	0.000170033	0.00360972
RTL10	236.204	0.589469	0.156789	3.75964	0.000170159	0.00360972
KLHL4	28.5687	1.9608	0.521627	3.75901	0.000170584	0.00361055
ZCCHC7	263.487	-0.621791	0.165426	-3.75872	0.000170785	0.00361055
CASP8AP2	855.55	0.722019	0.19215	3.75758	0.000171568	0.00362087
ZNF768	408.743	0.646881	0.172394	3.75233	0.000175199	0.00369118
UBE2G1	1239.94	-0.676585	0.180367	-3.75116	0.000176021	0.00370215
LINC01572	27.5147	1.97284	0.526049	3.75031	0.000176619	0.0037084
NEIL3	546.868	0.7839	0.209154	3.74796	0.000178282	0.00373057
SNHG3	1591.93	0.552008	0.147273	3.7482	0.000178106	0.00373057
STMN3	26.7854	-1.87586	0.500623	-3.74704	0.000178931	0.00373781
GRASLND	288.812	0.6858	0.183059	3.74633	0.000179439	0.00374207
PFKM	134.358	0.791981	0.211679	3.74142	0.00018298	0.00380523
SSX2IP	491.473	0.528249	0.141195	3.74128	0.000183087	0.00380523
FYN	2004.24	-0.747065	0.200057	-3.73425	0.000188274	0.00390645
ARB2A	210.734	-0.669152	0.179239	-3.73329	0.000188996	0.00391483
C9orf72	136.973	-0.878936	0.235675	-3.72944	0.000191908	0.00396846
PKD2	177.049	0.811886	0.217907	3.72584	0.000194663	0.00401869
CYP20A1	392.495	0.617645	0.16586	3.7239	0.000196167	0.00404295
ZMPSTE24-DT	81.3706	-1.01028	0.271729	-3.71796	0.000200841	0.00413234
TIPARP-AS1	14.0888	-1.98255	0.533684	-3.71483	0.000203338	0.00417212
ZNF337-AS1	124.901	1.15309	0.310414	3.71469	0.000203452	0.00417212
FLYWCH2	258.64	0.868706	0.233948	3.71325	0.000204618	0.00418906
PPP1R9B	575.73	-0.500532	0.134822	-3.71255	0.000205183	0.00419365
H2BC4	3698.67	-1.59978	0.431119	-3.71076	0.000206634	0.0042163
KIAA0513	93.7253	0.96447	0.259946	3.71027	0.000207035	0.00421748
G2E3	598.163	-0.737565	0.19887	-3.70878	0.000208264	0.0042355
RAPGEF2	268.83	0.90434	0.243875	3.70821	0.000208729	0.00423795
RASGRP3	214.568	1.06111	0.286245	3.707	0.00020973	0.00425127
NBAS	1135.08	-0.563259	0.152009	-3.70543	0.000211033	0.00427065
IGBP1	596.266	-0.797403	0.215308	-3.70356	0.000212599	0.00429527
CDCA8	565.119	-0.581977	0.157256	-3.70081	0.000214909	0.00433481
EMP1	16.2405	3.00953	0.813831	3.69798	0.000217323	0.00437633
GINS3	315.782	1.0657	0.288237	3.69729	0.000217914	0.0043779
MRPS27	1096.41	-0.693693	0.187634	-3.69706	0.000218112	0.0043779
FANCB	439.142	0.798957	0.216149	3.69632	0.000218747	0.00438349
GRK4	68.5111	0.858799	0.232563	3.69276	0.000221834	0.00443812
RAD9A	148.305	0.891688	0.2415	3.69228	0.000222248	0.00443919
CSNK1G2	791.157	-0.449039	0.121682	-3.69027	0.000224013	0.00445276
LINC02446	2598.03	-1.12395	0.304532	-3.69075	0.000223597	0.00445276
PGBD2	71.2866	1.09908	0.297803	3.69062	0.000223712	0.00445276
IKBKB-DT	6.562	5.92386	1.60568	3.68931	0.000224865	0.00446248
CHMP2A	336.05	-0.673953	0.182762	-3.68759	0.000226385	0.00448263
MAT2B	945.726	-0.569882	0.154551	-3.68734	0.000226609	0.00448263
GGACT	61.7927	-0.793537	0.215307	-3.68561	0.000228153	0.00450593
ATL3	647.603	0.598989	0.162557	3.68478	0.000228896	0.00451337
PITPNM1	494.292	0.594522	0.161381	3.68396	0.000229634	0.00452067
EIF3H	1845.42	-0.591996	0.160729	-3.68318	0.000230339	0.00452729
DDX11-AS1	52.1199	1.47997	0.402241	3.67933	0.000233851	0.00457441
DHRS1	121.125	0.763903	0.207598	3.67973	0.000233485	0.00457441
LMF2	360.872	0.971653	0.264058	3.6797	0.000233511	0.00457441
ZNF277	376.487	-0.949443	0.258328	-3.67534	0.000237529	0.00463898
H3C8	3088.67	-1.29868	0.353477	-3.674	0.000238784	0.0046561
DDX12P	105.03	2.04454	0.556718	3.67249	0.000240198	0.00467625
CHAF1A	517.157	1.04534	0.284741	3.6712	0.000241412	0.00469248
ARID5A	334.645	0.918194	0.250327	3.66798	0.000244473	0.00472383
CRELD2	209.155	0.867555	0.236486	3.66852	0.000243962	0.00472383
H2BC10	2095.91	-1.61841	0.441151	-3.66861	0.000243873	0.00472383
PASK	496.681	0.96247	0.262404	3.66789	0.000244561	0.00472383
CST7	2268.46	-0.81141	0.221476	-3.66365	0.000248645	0.00478768
RTKN2	74.9457	0.913928	0.249448	3.6638	0.000248502	0.00478768
CDCA5	1138.08	0.80862	0.22085	3.6614	0.000250842	0.00481491
CEP152	675.163	1.28736	0.351579	3.66166	0.000250586	0.00481491
NCF2	23.1265	1.85018	0.505512	3.66001	0.000252203	0.0048335
GNL1	539.921	0.481089	0.131494	3.65864	0.000253562	0.00485198
PLGRKT	78.7981	-0.884919	0.242025	-3.65631	0.000255877	0.00488868
AIP	419.252	-0.599922	0.164132	-3.65511	0.000257074	0.00489635
C5orf34	180.657	1.10025	0.301015	3.65514	0.000257038	0.00489635
CD83	222.879	1.39479	0.381649	3.65463	0.000257553	0.00489788
ERI2	198.431	0.90576	0.24796	3.65285	0.000259348	0.00491682
MRPS35	1322.73	-0.677194	0.185386	-3.65289	0.00025931	0.00491682
SLC2A3	2232.05	-1.05773	0.289608	-3.65228	0.000259925	0.00492018
NAA40	452.98	0.671857	0.183983	3.65173	0.000260478	0.00492308
CSRNP1	133.778	0.900885	0.246857	3.64942	0.000262835	0.00493933
CXorf38	305.101	-0.821704	0.225149	-3.64961	0.000262642	0.00493933
CYRIB	1581.48	-0.764806	0.209575	-3.64931	0.000262944	0.00493933
LYSMD4	105.583	0.871443	0.238751	3.65001	0.000262231	0.00493933
ADCY7	947.624	-0.454348	0.124535	-3.64835	0.000263925	0.0049502
TOP3A	1748.79	0.744537	0.204209	3.64595	0.000266404	0.0049891
CCNB3	71.5685	-1.5596	0.428059	-3.64343	0.000269031	0.00502971
SEPTIN6	1530.27	-0.627816	0.172331	-3.64308	0.00026939	0.00502971
NDUFS2	823.747	-0.665388	0.182758	-3.64083	0.000271765	0.00506636
EBAG9	182.913	-0.628275	0.172622	-3.63961	0.000273049	0.00507492
WDR75	745.046	-0.593051	0.162928	-3.63996	0.000272679	0.00507492
YIPF4	980.799	-0.596653	0.164047	-3.63708	0.000275747	0.00511734
FANCG	375.754	0.999036	0.274727	3.63646	0.000276407	0.00512185
C4A	45.6972	2.56336	0.705417	3.63382	0.000279256	0.00515911
DTD2	216.904	-0.661795	0.182107	-3.63411	0.000278946	0.00515911
MTUS1	157.253	0.834157	0.229724	3.63113	0.000282181	0.00520532
PSMG2	597.157	-0.543008	0.149743	-3.62626	0.000287561	0.00528872
PTPDC1	163.531	0.901145	0.248497	3.62638	0.000287418	0.00528872
WDHD1	1384.94	0.760206	0.209698	3.62524	0.000288689	0.00530154
HCP5	910.594	0.622286	0.171788	3.62239	0.000291889	0.00535231
ZNF813	176.356	0.931531	0.257255	3.62104	0.000293422	0.00537243
MTX3	174.421	0.918181	0.253794	3.61782	0.000297096	0.00543161
ASF1B	1409.98	1.10784	0.306271	3.61719	0.000297822	0.0054368
MDM1	270.34	0.880337	0.24377	3.61134	0.000304621	0.0055522
METAP2	1522.23	-0.770466	0.213368	-3.61098	0.000305046	0.0055522
ASNS	1372.96	-0.931402	0.258109	-3.60856	0.000307906	0.00558772
PPM1F-AS1	20.3241	1.62327	0.449826	3.60865	0.00030779	0.00558772
TRIOBP	329.276	0.794787	0.220429	3.60565	0.000311378	0.0056424
CCDC171	158.079	0.927273	0.257218	3.605	0.000312151	0.0056481
CEP112	125.467	1.013	0.281458	3.59912	0.00031929	0.00576034
RADX	125.467	0.866607	0.240765	3.59939	0.000318963	0.00576034
ING5	297.71	0.76274	0.212053	3.59693	0.000321993	0.00579591
WWC2	27.3608	1.50955	0.419698	3.59676	0.000322205	0.00579591
ZNF84	453.545	0.677301	0.188505	3.59301	0.000326879	0.00587142
MTAP	763.792	-0.578235	0.160962	-3.59236	0.000327695	0.0058775
NRF1	133.724	-0.601416	0.167453	-3.59155	0.000328711	0.00588713
ASB16-AS1	67.0055	1.30299	0.363019	3.58933	0.000331529	0.0059029
CCDC24	38.8174	1.24643	0.347191	3.59003	0.000330635	0.0059029
CKS2	502.062	-1.0016	0.279107	-3.58859	0.00033247	0.0059029
FUT4	48.4558	1.05345	0.293442	3.58998	0.000330709	0.0059029
RPS8	9306.21	-0.557619	0.155346	-3.58952	0.000331287	0.0059029
USP18	625.82	0.831433	0.231687	3.58861	0.000332444	0.0059029
ARL14EP	424.238	-0.492943	0.137443	-3.58653	0.000335109	0.00594119
BUB1	1964.44	-0.726266	0.202632	-3.58415	0.000338173	0.00598688
DYNLL2	591.533	0.588778	0.164332	3.58287	0.000339844	0.0059992
PIGQ	129.577	1.16749	0.32583	3.58311	0.000339527	0.0059992
RPS4Y1	952.648	-0.661576	0.184741	-3.58109	0.000342162	0.00603147
TMEM234	39.8583	1.45828	0.407314	3.58024	0.000343279	0.0060425
SHFL	270.534	0.573919	0.160322	3.57979	0.000343875	0.00604435
CSDE1	2557.35	-0.60601	0.169435	-3.57664	0.000348034	0.00609606
RFTN1	1623.74	-0.596086	0.16667	-3.57644	0.000348304	0.00609606
ST3GAL4	164.49	0.610231	0.170616	3.57664	0.000348037	0.00609606
RGS2	80.0384	1.01351	0.283428	3.57591	0.000349016	0.00609984
POLA1	1982.47	0.783194	0.219269	3.57184	0.000354484	0.00618662
FIGNL1	470.563	1.01278	0.283599	3.57116	0.000355408	0.00619397
ATP5F1D	151.323	-0.771435	0.216087	-3.57002	0.000356954	0.00619459
PRKAG1	321.763	-0.938334	0.262814	-3.57033	0.000356528	0.00619459
RPL4	18407.6	-0.617136	0.172851	-3.57034	0.000356518	0.00619459
MAP4K4	469.065	0.491193	0.137638	3.56873	0.000358714	0.00620762
WWOX	248.279	0.812857	0.227749	3.5691	0.000358211	0.00620762
CSNK2A1	1934.66	-0.613387	0.171955	-3.56714	0.000360903	0.00623332
WDR3	515.859	-0.756355	0.212048	-3.56691	0.000361212	0.00623332
DENND2D	867.617	-0.673656	0.188911	-3.566	0.000362471	0.00624628
NRAV	44.2453	1.51642	0.425672	3.56241	0.000367462	0.00632104
WDR62	475.737	0.958874	0.269184	3.56215	0.000367837	0.00632104
MTHFD1L	541.699	-0.670729	0.1884	-3.56013	0.000370673	0.00636089
MIF4GD	252.028	-0.766688	0.215445	-3.55863	0.000372792	0.00638333
NIPSNAP1	1337.61	-0.619991	0.17423	-3.55847	0.000373018	0.00638333
COX18	269.621	-0.879395	0.247229	-3.55701	0.000375099	0.00641002
CPLANE1	274.926	0.911925	0.25658	3.55415	0.0003792	0.00647111
APEX2	317.021	0.566893	0.15971	3.54952	0.000385929	0.00657203
SYNCRIP	2439.56	-0.750157	0.211372	-3.54899	0.000386716	0.00657203
ZNF66	84.8506	1.31856	0.371505	3.54924	0.000386344	0.00657203
BCKDHA	459.437	-0.754972	0.212846	-3.54704	0.000389585	0.00661166
H2AC20	2063.24	-1.08838	0.3072	-3.54291	0.000395741	0.00670688
FICD	105.162	1.02906	0.290569	3.54153	0.000397807	0.00673262
RPL18A	4741.58	-0.584068	0.164974	-3.54036	0.000399587	0.00675347
GRAMD1C	8.25422	3.74995	1.05945	3.53951	0.000400869	0.00676583
SNX14	1148.96	-0.459247	0.129767	-3.53902	0.000401612	0.00676909
MAP3K9	118.165	0.885739	0.250324	3.53837	0.000402611	0.00677664
EML6	577.407	1.26817	0.358568	3.53677	0.000405052	0.00680842
CDC27	2241.26	-0.509208	0.144037	-3.53525	0.000407382	0.00683823
ZP3	5.31956	5.63322	1.59362	3.53486	0.000407998	0.00683924
H2AC14	1979.65	-1.31296	0.371525	-3.53396	0.000409381	0.00684378
UFL1	496.831	-0.603777	0.170847	-3.53402	0.000409291	0.00684378
ABCF2-H2BK1	523.322	-0.618205	0.174974	-3.53312	0.000410684	0.00684697
CFHR1	17.3678	2.03267	0.575306	3.5332	0.000410569	0.00684697
ZNF37BP	721.815	0.82813	0.234433	3.53249	0.000411672	0.00685414
FANCD2	1472.79	0.703703	0.199296	3.53094	0.00041409	0.00687771
PRXL2B	90.2515	0.75381	0.213492	3.53086	0.000414205	0.00687771
GNL3L	1246.12	-0.361122	0.102474	-3.52403	0.000425033	0.0070385
MPC2	613.206	0.686929	0.194927	3.52404	0.000425027	0.0070385
TIMD4	22.8052	1.7584	0.499064	3.52339	0.000426069	0.00704617
DPH6	142.012	-0.822155	0.233376	-3.52288	0.00042689	0.00705027
GPRIN1	77.9953	1.6201	0.460173	3.52064	0.000430507	0.00710048
PAK1IP1	188.245	-0.869443	0.247021	-3.51971	0.00043202	0.00711589
FBXL12	210.083	0.80833	0.229758	3.51818	0.000434522	0.00714754
SCCPDH	578.406	0.50153	0.142584	3.51744	0.000435723	0.00715773
KIF5B	2948.41	-0.475762	0.135289	-3.51665	0.000437029	0.00716961
LRP11	550.724	0.460961	0.1311	3.5161	0.000437939	0.00717497
C17orf75	139.861	-0.803674	0.228649	-3.51487	0.000439961	0.00719851
EIF3A	2660.94	-0.623737	0.177531	-3.51339	0.000442421	0.00720999
SNHG22	138.988	0.945826	0.269163	3.51395	0.00044149	0.00720999
SUSD3	383.884	-1.04744	0.298104	-3.51366	0.000441983	0.00720999
METAP1	1020.89	-0.688344	0.196098	-3.5102	0.000447773	0.00728756
CLYBL	256.331	-1.42747	0.406864	-3.50848	0.000450668	0.00732095
EXOG	174.563	1.18713	0.338427	3.50778	0.000451865	0.00732095
RPS24	6913.43	-0.535545	0.152682	-3.50758	0.000452204	0.00732095
ZFYVE16	1298.28	0.675037	0.192437	3.50784	0.000451764	0.00732095
RPL15	5306.79	-0.660726	0.188401	-3.50703	0.000453144	0.00732652
RAB10	2063.19	-0.695742	0.198415	-3.50651	0.00045403	0.00733121
KHDC1	98.8108	1.26982	0.362367	3.50423	0.000457928	0.00738446
RPS25	3169.31	-0.710583	0.202982	-3.50071	0.000464015	0.00747282
PARP3	231.424	0.720206	0.205841	3.49886	0.000467259	0.00750542
RPLP0	19394.4	-0.668342	0.191005	-3.49909	0.000466853	0.00750542
C1QL4	40.3509	1.3413	0.383873	3.49412	0.000475624	0.00762983
MYG1	199.35	-0.710318	0.203344	-3.49318	0.000477306	0.00764359
NAT10	1219.1	-0.567174	0.162377	-3.49295	0.000477724	0.00764359
IMPACT	762.589	-0.521875	0.149478	-3.49131	0.000480658	0.00768055
HLA-DMA	27.6285	1.2598	0.360939	3.49033	0.000482426	0.00769879
RFK	597.183	-0.798855	0.228901	-3.48996	0.0004831	0.00769956
KLF10	426.354	1.00627	0.288485	3.48811	0.00048645	0.00774292
MIR646HG	15.4903	-2.01757	0.578518	-3.48749	0.000487582	0.00775092
SNTA1	27.0589	1.3296	0.381354	3.48651	0.000489365	0.00775984
ZNF345	75.7511	1.24055	0.355816	3.48649	0.000489405	0.00775984
RPS2P5	1487.18	-0.672435	0.192955	-3.48494	0.00049225	0.00779491
RAD51B	209.019	0.867385	0.248953	3.48413	0.000493736	0.0078084
RAD9B	69.1141	1.14241	0.328011	3.48285	0.000496106	0.0078358
SPAG4	63.1155	1.3032	0.374316	3.48157	0.000498492	0.00786339
TP53I3	75.708	1.18136	0.339357	3.48116	0.000499241	0.00786513
CETN3	257.301	-0.725266	0.208385	-3.48042	0.00050063	0.00787692
H3C4	1396.81	-1.25569	0.360955	-3.47882	0.000503636	0.00791409
FXR1	1579.31	-0.695094	0.19986	-3.47791	0.000505332	0.00793062
LEO1	294.47	-0.763073	0.219477	-3.47679	0.000507461	0.00795389
LNP1	39.859	-1.09243	0.314243	-3.47638	0.000508226	0.00795574
LINC00921	14.0649	2.10904	0.60705	3.47424	0.000512302	0.00800526
SNORA73B	665.393	1.22732	0.353283	3.47404	0.00051269	0.00800526
CARD19	338.85	-0.58155	0.167629	-3.46928	0.000521862	0.00808689
CCM2	606.707	-0.407946	0.117566	-3.46994	0.00052058	0.00808689
DKC1	2079.2	-0.624008	0.179815	-3.47028	0.000519924	0.00808689
NCAPG2	1001.28	0.636831	0.183503	3.47042	0.000519646	0.00808689
RNASEK	187.472	-0.513772	0.148092	-3.46928	0.00052186	0.00808689
SP2-DT	22.3707	1.81155	0.522017	3.47029	0.000519901	0.00808689
FAM161A	158.869	1.51979	0.438163	3.46854	0.000523287	0.00809876
PNRC2	2622.78	-0.410266	0.118356	-3.46638	0.000527525	0.0081541
HK1	1473.23	-0.850533	0.245501	-3.46447	0.000531272	0.00819144
ZNF436	284.147	0.831823	0.240098	3.46451	0.000531191	0.00819144
MTHFS	103.225	0.926423	0.267454	3.46386	0.000532477	0.00819975
LZTS3	42.4387	1.95644	0.565124	3.46197	0.000536235	0.00824729
LBR	3664.41	-0.738477	0.213332	-3.46163	0.000536913	0.00824741
GPI	4360.56	-0.779302	0.225363	-3.45798	0.000544235	0.00832925
LIMS1	1845.68	-0.770757	0.222908	-3.45773	0.000544748	0.00832925
POLA2	726.236	0.883809	0.255611	3.45763	0.000544949	0.00832925
SNHG5	1219.51	-0.472966	0.13676	-3.45838	0.000543442	0.00832925
STS	198.772	0.907592	0.262591	3.45629	0.000547669	0.00836044
PYROXD1	321.404	-0.705902	0.20458	-3.45049	0.00055956	0.00853138
CHRNA6	9.70137	2.5022	0.725469	3.44907	0.000562517	0.00853416
CHROMR	222.67	0.988569	0.28657	3.44966	0.000561287	0.00853416
INO80	543.782	-0.503276	0.145881	-3.4499	0.000560789	0.00853416
TANGO2	229.322	0.654926	0.189879	3.44917	0.000562308	0.00853416
PRPF6	893.346	-0.367167	0.106489	-3.44792	0.000564917	0.00855212
RAC2	823.354	-0.526095	0.152587	-3.44784	0.00056509	0.00855212
RPL5	6295.44	-0.676054	0.196123	-3.44709	0.000566652	0.00856522
C1orf198	367.122	0.591022	0.171522	3.44576	0.000569462	0.00859713
PDE4D	2376.22	-0.697016	0.202326	-3.44502	0.000571018	0.00861005
SCRN3	49.2843	1.25328	0.364015	3.44295	0.000575403	0.00866555
EEPD1	14.2828	1.83493	0.533036	3.44241	0.000576558	0.00867233
PRELID3A	24.2434	1.78879	0.5205	3.43668	0.000588898	0.00882558
TBXAS1	13.9308	2.21103	0.643329	3.43685	0.000588511	0.00882558
ZNF443	77.0028	0.796075	0.231609	3.43715	0.000587873	0.00882558
EXOSC7	354.436	-0.779274	0.226892	-3.43455	0.00059353	0.00887338
MSH2	2347.65	0.984024	0.286497	3.43468	0.00059326	0.00887338
ZNF718	325.918	0.83162	0.242177	3.43393	0.000594889	0.0088829
LRIG1	5253.21	-0.591332	0.172236	-3.43326	0.000596374	0.00889429
MASTL	712.201	0.806022	0.234851	3.43206	0.000599024	0.008923
RIOX2	328.051	-0.752587	0.219515	-3.4284	0.000607141	0.00903297
RAD51	305.405	0.885633	0.258359	3.42791	0.00060825	0.00903717
RPL38	3235.75	-0.641313	0.187101	-3.42762	0.000608892	0.00903717
LRRC1	98.6182	0.818654	0.238913	3.42658	0.000611229	0.00905876
PPP2R5D	525.787	-0.466841	0.136251	-3.42632	0.000611819	0.00905876
EIF3M	2725.42	-0.598063	0.17457	-3.42592	0.000612723	0.00906123
ATE1	465.666	-0.429354	0.125401	-3.42385	0.000617398	0.00911941
OPA1	2672.22	-0.570791	0.166761	-3.4228	0.000619791	0.00914377
MRNIP	137.784	0.908433	0.265509	3.42147	0.000622827	0.00916658
ORC6	672.976	1.01849	0.297663	3.42162	0.000622488	0.00916658
PPP3CB	295.289	-1.25358	0.366428	-3.42108	0.000623741	0.00916906
FBXO28	432.109	0.482266	0.141013	3.42001	0.00062619	0.00918312
TIE1	39.551	2.19928	0.643025	3.42021	0.00062572	0.00918312
H2AC21	908.788	-0.937963	0.274316	-3.41927	0.000627885	0.00919701
SRP72	1790.39	-0.595659	0.174326	-3.41692	0.000633339	0.0092377
TLE3	356.389	0.530509	0.155247	3.41721	0.000632676	0.0092377
TNFAIP8L1	121.097	-0.761887	0.222984	-3.41678	0.000633666	0.0092377
ZNF407-AS1	191.546	0.720827	0.21091	3.41769	0.00063154	0.0092377
GPD1L	1217.8	-1.12487	0.329573	-3.41311	0.000642258	0.00935188
ANKRD6	16.5612	1.98038	0.58047	3.41168	0.000645635	0.00935897
CABLES2	79.1168	0.98006	0.287203	3.41243	0.000643863	0.00935897
CSAG3	81.3905	0.777891	0.227989	3.41197	0.000644945	0.00935897
MIR497HG	184.104	1.19141	0.349222	3.41162	0.000645787	0.00935897
CCDC82	332.732	0.774164	0.227194	3.40751	0.000655596	0.00948995
DYRK2	1991.33	-0.691623	0.20305	-3.40617	0.000658811	0.00952528
CS	1643.49	-0.651384	0.191264	-3.40569	0.000659971	0.00953085
DDHD2	831.981	-0.489154	0.143705	-3.40387	0.000664378	0.00957186
ITK	886.636	-0.565318	0.166096	-3.40356	0.000665145	0.00957186
PIK3CD	2814.44	-0.550053	0.161592	-3.40397	0.000664137	0.00957186
COG8	320.98	-0.488963	0.143698	-3.40271	0.000667211	0.00957924
RPL22	4422.84	-0.65634	0.192887	-3.40271	0.000667215	0.00957924
ANXA2R-OT1	75.58	1.14256	0.335984	3.40065	0.000672263	0.00964047
TDP1	603.618	-0.481486	0.141639	-3.39939	0.000675354	0.00967352
MBNL3	72.8435	0.979294	0.288161	3.39843	0.000677747	0.00969651
PSMD12	771.233	-0.793441	0.233538	-3.39748	0.000680101	0.00971889
PRMT3	668.136	-0.626089	0.184347	-3.39626	0.000683145	0.00975106
TMTC4	463.808	-0.68517	0.201872	-3.39409	0.000688579	0.00981724
CASP2	340.614	0.73695	0.217209	3.39281	0.000691784	0.00985152
STIL	1199.73	0.6447	0.190043	3.3924	0.000692836	0.00985509
DNAH10	23.3581	1.60128	0.472201	3.3911	0.000696114	0.00988178
KDM4A-AS1	27.0314	1.42754	0.420995	3.39086	0.000696733	0.00988178
KIF3C	149.396	0.924516	0.272662	3.39071	0.000697122	0.00988178
MFGE8	159.214	1.10488	0.325961	3.38962	0.000699903	0.00988809
NUDCD2	509.913	-0.68739	0.202788	-3.3897	0.000699689	0.00988809
TMEM182	60.0488	1.16554	0.34386	3.38959	0.000699978	0.00988809
C9orf40	239.38	0.681926	0.2013	3.3876	0.000705059	0.00994037
FOCAD	452.062	-0.578542	0.170787	-3.38751	0.000705295	0.00994037
APPAT	10.1557	3.02131	0.892184	3.38642	0.000708112	0.00996866
MCM8	1438.64	0.86812	0.256444	3.38522	0.000711203	0.0100007
ATP10D	195.981	0.528018	0.156051	3.38362	0.000715377	0.0100464
SKA3	590.373	0.835565	0.246964	3.38335	0.000716084	0.0100464
FBXO43	93.0569	0.933556	0.275967	3.38286	0.000717364	0.0100529
KIAA0753	204.996	0.753661	0.222822	3.38235	0.000718695	0.0100601
SUN2	2718.77	-0.527967	0.156231	-3.3794	0.00072643	0.0101568
NAA15	1051.76	-0.662406	0.196037	-3.37898	0.000727543	0.0101608
MAN2B2	358.419	0.662673	0.196255	3.3766	0.000733888	0.0102262
RPL35	7087.24	-0.635669	0.188245	-3.37682	0.000733293	0.0102262
SP140	675.603	0.50097	0.148399	3.37584	0.000735909	0.0102428
DVL2	761.356	0.43561	0.129053	3.37543	0.000737006	0.0102465
PLEKHF2	316.824	0.592599	0.175634	3.37405	0.000740699	0.0102862
FAM131B-AS2	26.6494	1.37771	0.408417	3.3733	0.00074274	0.0103029
ZMYM4	1204.76	0.421721	0.125036	3.3728	0.00074407	0.0103097
TRIM16	178.665	-1.08733	0.322444	-3.37216	0.000745819	0.0103223
LINC00324	7.78047	2.60918	0.775116	3.36618	0.000762167	0.0105367
TAOK2	667.691	0.484289	0.143933	3.36468	0.000766312	0.0105822
ADGRG5	19.5545	1.58326	0.470608	3.36428	0.000767429	0.0105857
CCDC80	34.2175	1.66554	0.495224	3.36321	0.00077041	0.0106034
DRAIC	9.3874	2.32829	0.69229	3.36317	0.000770518	0.0106034
RECQL4	685.886	1.24847	0.371248	3.3629	0.000771295	0.0106034
CRMP1	60.0311	1.03858	0.308879	3.36242	0.000772629	0.0106098
CCP110	366.176	0.659693	0.196218	3.36204	0.000773693	0.0106126
RPS11	6687.5	-0.594035	0.176777	-3.36035	0.000778426	0.0106656
EIF4E	997.914	-0.928318	0.276616	-3.35598	0.000790844	0.0108237
NEK8	71.7111	1.14072	0.33995	3.35554	0.00079209	0.0108288
ST6GALNAC4	200.465	-0.64828	0.193236	-3.35487	0.000794033	0.0108433
PRR5L	23.6738	1.55778	0.464508	3.35361	0.000797636	0.0108804
BORCS8	61.9438	1.45765	0.434719	3.35309	0.000799158	0.0108891
CDKL1	16.7	1.8821	0.561752	3.35042	0.000806897	0.0109803
RASA1	455.183	-0.756376	0.225773	-3.35016	0.000807638	0.0109803
MTA1-DT	13.5291	2.6671	0.796498	3.34853	0.0008124	0.0110226
MTM1	705.675	-0.616601	0.184143	-3.34849	0.000812538	0.0110226
PLXNC1	666.421	0.564865	0.168771	3.34694	0.000817098	0.0110722
MTFR1L	226.572	-0.753609	0.225296	-3.34497	0.0008229	0.0111386
VAV2	325.392	0.567469	0.169763	3.34271	0.000829639	0.0112174
SFMBT1	357.619	0.453356	0.1357	3.34086	0.000835187	0.0112801
CFI	30.3102	1.8694	0.560459	3.33549	0.000851492	0.0114877
ZNF324	148.431	1.00173	0.300459	3.334	0.000856052	0.0115365
ORC2	479.794	-0.674119	0.202371	-3.3311	0.00086503	0.0116448
RPS6	10449.8	-0.528927	0.158872	-3.32927	0.000870742	0.0117089
AP4M1	137.902	0.898793	0.270165	3.32683	0.000878411	0.0117991
RASSF7	127.329	0.983679	0.295719	3.3264	0.000879742	0.0118041
UCK1	445.786	0.638555	0.192243	3.32161	0.000895004	0.0119958
C16orf86	27.2647	1.29744	0.391127	3.31719	0.000909271	0.0121737
LRRC23	20.4934	-1.70742	0.514845	-3.31638	0.000911915	0.0121959
TSPAN2	4.18308	5.2654	1.5883	3.31512	0.000916037	0.0122377
ZBTB22	156.018	-0.709291	0.214064	-3.31345	0.000921532	0.0122978
ARF1	1139.57	-0.665282	0.200871	-3.31198	0.000926376	0.012349
IL32	4154.36	-0.766366	0.231848	-3.30547	0.000948176	0.0126152
NFKBIZ	228.156	1.21999	0.369091	3.3054	0.000948393	0.0126152
ARMC5	128.362	0.701432	0.212298	3.30399	0.00095319	0.0126617
IMMP2L	105.144	-0.757734	0.229354	-3.30377	0.000953947	0.0126617
DGCR6L	440.185	0.805321	0.243896	3.3019	0.000960315	0.0126914
DYNC2I2	820.612	1.22262	0.37027	3.30196	0.000960133	0.0126914
SHB	22.0888	1.81921	0.550926	3.30209	0.000959666	0.0126914
VCAM1	110.408	1.24838	0.378045	3.30221	0.000959263	0.0126914
NAGLU	142.026	-0.794043	0.240558	-3.30084	0.000963975	0.0127261
TYSND1	276.024	-0.660019	0.199999	-3.30012	0.000966441	0.012745
HSPA2	511.534	2.41047	0.730777	3.2985	0.000972031	0.012805
CAPRIN1	4630.85	-0.499079	0.151362	-3.29724	0.000976386	0.0128486
RPL13	9353.56	-0.407259	0.123567	-3.29585	0.000981235	0.0128986
IFI27L2	117.695	0.65	0.19726	3.29515	0.000983693	0.0129076
TELO2	304.548	1.12205	0.340526	3.29506	0.000984018	0.0129076
SP140L	181.575	0.893533	0.27125	3.29413	0.000987262	0.0129364
NCL	2459.08	-0.832607	0.252839	-3.29303	0.000991129	0.0129732
RBBP8	2196.62	0.661192	0.200847	3.29201	0.000994744	0.0130067
MED30	213.414	-0.603943	0.183491	-3.2914	0.000996885	0.0130172
TOP2B	4839.94	-0.796569	0.242031	-3.29118	0.000997664	0.0130172
BCORP1	56.1031	1.39219	0.423265	3.28918	0.00100481	0.0130688
LINC00342	62.48	1.97339	0.599874	3.28967	0.00100306	0.0130688
XRCC2	393.39	1.11963	0.340387	3.28929	0.00100442	0.0130688
NT5C	336.463	-0.733593	0.223101	-3.28816	0.00100843	0.0131022
POLR3E	638.4	-0.588197	0.178906	-3.28774	0.00100996	0.0131082
FAM114A2	264.313	-0.546716	0.166333	-3.28687	0.00101309	0.0131349
SCYL1	619.762	-0.347892	0.105954	-3.28341	0.00102558	0.0132829
OGG1	210.374	0.877305	0.267223	3.28305	0.00102692	0.0132862
IL17D	38.2531	1.16684	0.355584	3.28148	0.00103265	0.0133324
SHISA5	850.721	-0.51188	0.155982	-3.28165	0.00103201	0.0133324
MRPL45	261.041	-0.723781	0.220595	-3.28104	0.00103424	0.0133389
NGFR	58.7704	1.02664	0.312928	3.28074	0.00103533	0.013339
NSMAF	728.852	-0.468774	0.1429	-3.28044	0.00103646	0.0133395
PSMD6	708.189	-0.689219	0.21014	-3.27981	0.00103877	0.0133553
ZNF500	174.966	0.740323	0.225784	3.2789	0.00104213	0.0133845
IARS1	7483.11	-0.55241	0.168506	-3.27827	0.00104444	0.0134002
ASAH2B	17.9154	1.67964	0.512466	3.27756	0.00104709	0.0134068
LAPTM4A	150.742	0.622073	0.189807	3.2774	0.00104767	0.0134068
PSMC6	868.069	-0.71775	0.219028	-3.27698	0.00104922	0.0134068
YWHAZ	4948.4	-0.64108	0.195632	-3.27696	0.00104931	0.0134068
UBQLN1	839.599	-0.87274	0.266452	-3.27541	0.00105509	0.0134666
EIF2D	689.36	-0.34876	0.106531	-3.27379	0.00106117	0.0135301
PATZ1	317.746	0.531944	0.162641	3.27066	0.00107297	0.0136664
FAM43A	35.3496	2.04998	0.626875	3.27016	0.00107486	0.0136764
EIF3L	2984.6	-0.589592	0.180421	-3.26786	0.00108363	0.0137312
GRK2	3180.45	-0.453372	0.138721	-3.26823	0.00108223	0.0137312
INTS10	1249.43	-0.655522	0.200579	-3.26815	0.00108253	0.0137312
POLE	1604.54	0.983785	0.301006	3.26832	0.00108187	0.0137312
CEACAM16-AS1	89.6321	-1.48548	0.455057	-3.26439	0.001097	0.0138862
MEX3D	124.932	1.10743	0.339421	3.2627	0.00110357	0.013928
SNRNP48	464.101	-0.437282	0.134012	-3.26301	0.00110235	0.013928
TMBIM4	165.298	-0.739903	0.226799	-3.26238	0.00110482	0.013928
TMCO3	521.201	0.52191	0.159968	3.26259	0.001104	0.013928
ZNF75A	308.806	0.909409	0.278862	3.26114	0.00110964	0.0139744
MSN	8723.91	-0.525348	0.16127	-3.25757	0.00112371	0.0141371
NEK2	889.194	-0.489149	0.150424	-3.25179	0.00114679	0.0144127
MAP3K2-DT	22.4694	1.49632	0.460198	3.25148	0.00114805	0.0144139
H2AC11	4961.5	-0.986609	0.303585	-3.24986	0.00115462	0.0144815
CARM1	517.998	-0.810042	0.249398	-3.24799	0.00116225	0.0145419
COA5	184.564	-0.644519	0.198435	-3.24802	0.00116213	0.0145419
NUDT4	1279.18	-0.330958	0.101911	-3.24752	0.00116416	0.0145419
TFB1M	132.731	-0.584648	0.180027	-3.24757	0.00116397	0.0145419
ENTPD7	158.911	0.685346	0.211133	3.24604	0.00117023	0.0145882
KDM1A	2571.68	-0.55707	0.171611	-3.24611	0.00116992	0.0145882
NR1D2	664.197	-0.969946	0.298904	-3.245	0.0011745	0.0146265
CHTF18	552.582	1.12258	0.345985	3.24459	0.00117619	0.0146328
CRYBG3	35.9872	1.33646	0.41207	3.24327	0.00118164	0.0146858
SPICE1	244.727	0.79998	0.246704	3.24267	0.00118414	0.0147019
CEBPZOS	489.392	-0.704534	0.217385	-3.24095	0.00119132	0.0147762
NARS1	2065.41	-0.53456	0.164977	-3.24021	0.00119442	0.0147998
GABARAP	522.881	0.485076	0.149835	3.2374	0.00120623	0.0149146
LRRC57	201.448	0.862302	0.266354	3.23743	0.00120612	0.0149146
RTTN	620.603	0.693125	0.214116	3.23714	0.00120733	0.0149146
CHPF2	366.087	0.51733	0.159846	3.23644	0.00121033	0.0149278
EIF3J-DT	134.967	-0.623456	0.192643	-3.23632	0.00121082	0.0149278
BTBD6	125.114	1.26017	0.389535	3.23506	0.00121618	0.0149728
NDUFA6-DT	54.8944	1.36686	0.422536	3.23489	0.00121691	0.0149728
KCNJ11	103.058	-0.858495	0.26548	-3.23374	0.0012218	0.015003
TMEM106C	2244.47	0.812991	0.251392	3.23395	0.00122089	0.015003
SMPD4BP	67.8207	1.31778	0.407624	3.23284	0.00122565	0.0150353
STXBP6	61.595	0.93569	0.28952	3.23187	0.00122983	0.0150565
ZNF219	67.202	0.767677	0.237518	3.23207	0.00122895	0.0150565
ZNF688	60.2325	1.04733	0.324262	3.22989	0.00123838	0.0151462
USP3	526.459	-0.730514	0.226255	-3.22872	0.00124344	0.015193
LINC00662	255.525	-0.900702	0.279141	-3.22669	0.0012523	0.0152708
PFDN4	303.793	-0.500734	0.155181	-3.22678	0.00125193	0.0152708
MYORG	53.2024	1.16884	0.362293	3.22623	0.00125432	0.0152804
TRIM68	251.231	0.81146	0.251715	3.22372	0.00126536	0.0153996
BTN3A2	605.724	-0.806638	0.250266	-3.22312	0.00126801	0.0154166
DDX54	1185.17	-0.628836	0.195207	-3.22138	0.00127576	0.0154956
RPS6KB1	788.19	-0.44088	0.136899	-3.22047	0.00127981	0.0155294
EBPL	346.719	-0.655858	0.203693	-3.21984	0.00128261	0.0155454
RBM4B	204.933	1.22089	0.379205	3.21961	0.00128365	0.0155454
FRAT1	82.3167	1.21534	0.377761	3.21721	0.00129442	0.0156604
TSHZ1	978.733	-0.683751	0.212573	-3.21654	0.00129745	0.0156815
CD82	217.548	0.754434	0.23461	3.2157	0.00130128	0.015697
SLC66A2	439.319	0.648084	0.201521	3.21596	0.00130008	0.015697
DONSON	427.609	0.920653	0.286424	3.21431	0.00130761	0.0157323
SOS1	3596.6	-0.9717	0.302314	-3.21421	0.00130804	0.0157323
TACC2	24.3821	2.08699	0.649301	3.21421	0.00130805	0.0157323
FOSB	62.2084	3.48733	1.08546	3.21277	0.0013146	0.0157803
PRR34	21.5313	-1.33424	0.415271	-3.21295	0.00131381	0.0157803
EIF2AK4	1242.02	-0.472488	0.147089	-3.21225	0.00131701	0.0157938
ZNF252P	267.704	0.97151	0.302546	3.21112	0.00132221	0.0158408
XKR3	20.2524	1.41331	0.440174	3.2108	0.00132364	0.0158425
CSTB	57.085	0.880906	0.274407	3.21022	0.00132633	0.0158592
TMED5	780.66	-0.500969	0.156145	-3.20836	0.00133493	0.0159466
EYA3	524.374	-0.711094	0.221691	-3.20759	0.00133851	0.0159483
POLR1D	1081.85	-0.479754	0.149566	-3.20765	0.00133826	0.0159483
RACK1	11952.3	-0.578042	0.180216	-3.2075	0.00133896	0.0159483
WDR76	1194.35	0.836541	0.260838	3.20713	0.00134068	0.0159533
IQCC	117.057	1.40278	0.437541	3.20606	0.00134568	0.0159973
ZNF829	119.764	1.17867	0.367798	3.20466	0.00135224	0.0160598
MEPCE	436.784	0.48185	0.150464	3.20243	0.00136272	0.0161531
SMIM26	355.474	-0.654559	0.204385	-3.20258	0.00136202	0.0161531
EAF2	96.5297	1.18526	0.370334	3.20052	0.00137178	0.01617
FMO4	11.7771	1.91144	0.597103	3.20119	0.00136862	0.01617
IMPDH2	3010.44	-0.607128	0.189705	-3.20038	0.00137246	0.01617
MMS19	929.044	-0.43098	0.134673	-3.2002	0.00137334	0.01617
NAMPT	1350.89	-0.586872	0.18338	-3.2003	0.00137283	0.01617
PTK2	2.85539	4.75085	1.48405	3.20127	0.00136821	0.01617
RNF168	665.168	0.520417	0.162542	3.20174	0.00136602	0.01617
SKA1	519.194	0.725696	0.226853	3.19898	0.00137916	0.0162229
DNM1L	1995.24	-0.450368	0.140858	-3.19732	0.0013871	0.0162882
ME2	1151.55	-0.667597	0.208816	-3.19706	0.00138837	0.0162882
TRIM45	74.3472	1.10972	0.347114	3.19699	0.00138868	0.0162882
C19orf48P	1060.79	0.556102	0.173969	3.19656	0.00139076	0.0162971
LCP1	20737.6	-0.571144	0.178724	-3.19568	0.00139504	0.0163317
H3C6	714.095	-1.0551	0.330636	-3.19112	0.00141722	0.0165756
DAZAP1	1176.17	-0.552843	0.173279	-3.19048	0.00142035	0.0165964
SNRPA1	217.892	-0.869204	0.272704	-3.18735	0.00143582	0.0167613
ARHGEF17	50.823	1.36465	0.428415	3.18534	0.00144587	0.0168423
CEPT1	311.817	-0.47117	0.147922	-3.18525	0.0014463	0.0168423
UBE2V1	778.374	-0.623252	0.195678	-3.1851	0.00144706	0.0168423
ZNF141	176.027	0.816775	0.256456	3.18486	0.00144824	0.0168423
ZNF10	104.329	0.946694	0.29733	3.18398	0.00145263	0.0168774
NIPSNAP2	346.216	-0.740586	0.23272	-3.18231	0.00146107	0.0169256
SOCS4	928.903	0.454168	0.142701	3.18266	0.00145929	0.0169256
SPATA33	75.7192	1.5396	0.483836	3.18207	0.00146228	0.0169256
XRN2	2428.02	-0.542083	0.170344	-3.18227	0.00146124	0.0169256
AURKA	1182.45	-0.650628	0.204495	-3.18164	0.00146445	0.0169256
CUL3	754.756	-0.601863	0.189174	-3.18152	0.00146503	0.0169256
PDCD6IP-DT	15.118	2.25154	0.708056	3.17989	0.00147329	0.017005
MRPS5	693.512	-0.601807	0.189337	-3.17849	0.00148045	0.0170716
MTIF2	945.356	-0.478082	0.150425	-3.1782	0.00148194	0.0170728
RHOF	514.331	-0.74093	0.233368	-3.17495	0.00149864	0.0172491
KPNA2	2669.33	-0.687318	0.216549	-3.17396	0.00150374	0.0172916
ADAM17	1177.35	-0.341975	0.107794	-3.17248	0.00151142	0.0173399
KMT5C	146.109	0.757559	0.238802	3.17234	0.00151217	0.0173399
ZNF700	468.978	0.626487	0.197478	3.17244	0.00151164	0.0173399
HMGB3P32	7.63153	2.38179	0.751069	3.1712	0.00151811	0.0173919
ZNF738	271.137	1.04329	0.329077	3.17035	0.00152254	0.0174264
ABCA7	253.587	1.19388	0.376965	3.16708	0.00153979	0.0175747
IFT22	131.19	0.848008	0.267742	3.16726	0.00153885	0.0175747
SUCLA2	699.188	-0.649257	0.204993	-3.16722	0.00153904	0.0175747
SLC4A2	695.009	0.511799	0.161618	3.16672	0.00154168	0.0175801
ACTR6	610.435	-0.600038	0.189508	-3.16629	0.00154396	0.0175897
SMG5	1752.95	0.593761	0.187642	3.16432	0.00155443	0.0176927
SHROOM1	98.8473	1.04639	0.330712	3.16404	0.00155596	0.0176936
ATP2C1	870.139	0.567832	0.179489	3.16361	0.00155828	0.0177036
BARD1	883.945	0.534349	0.16892	3.16332	0.0015598	0.0177046
DTD1	451.159	-0.721476	0.228105	-3.16292	0.00156196	0.0177128
TULP3	335.509	0.596347	0.188569	3.16249	0.00156425	0.0177224
CYREN	254.437	0.686066	0.216981	3.16187	0.00156758	0.0177275
SAMD9	588.937	0.81317	0.257166	3.16204	0.00156665	0.0177275
B3GALT9	135.078	0.680087	0.215114	3.16152	0.00156949	0.0177328
VPS36	571.615	-0.511717	0.161877	-3.16115	0.00157145	0.0177387
HIRIP3	125.976	0.746674	0.236252	3.1605	0.00157497	0.0177458
ZNF70	53.4443	1.3053	0.412973	3.16075	0.00157365	0.0177458
DDAH2	105.322	0.727503	0.230292	3.15905	0.00158285	0.0178183
CLPX	927.446	-0.586082	0.185594	-3.15787	0.00158928	0.0178319
IARS2	1656.76	-0.763216	0.241703	-3.15766	0.00159042	0.0178319
MIR4435-2HG	701.777	-0.433357	0.137247	-3.1575	0.00159131	0.0178319
PARTICL	29.9705	-0.996919	0.315654	-3.15826	0.00158714	0.0178319
STK16	255.54	-0.540434	0.171116	-3.15829	0.00158697	0.0178319
ANAPC16	981.312	-0.560347	0.177558	-3.15586	0.00160027	0.0178885
GPANK1	187.229	0.85938	0.272308	3.15592	0.00159995	0.0178885
TMEM201	319.807	0.899719	0.285102	3.15578	0.00160071	0.0178885
FAM50A	728.611	0.566302	0.179511	3.1547	0.00160665	0.0179364
TRAPPC8	1194.36	-0.320179	0.101504	-3.15434	0.00160863	0.0179364
ZBTB40	1059.31	0.71344	0.226187	3.1542	0.00160938	0.0179364
ZNF430	321.347	0.784326	0.248686	3.15388	0.00161117	0.0179401
DUBR	70.8533	0.935712	0.296779	3.15289	0.00161662	0.0179531
ERCC6L2-AS1	97.014	0.850846	0.269861	3.1529	0.00161656	0.0179531
GTF2E2	454.536	-0.771139	0.244594	-3.15273	0.00161751	0.0179531
PARP14	3015.45	0.479804	0.152218	3.15209	0.00162109	0.0179531
RASIP1	21.907	2.32278	0.73679	3.15257	0.0016184	0.0179531
UBAC2	1355.93	-0.573395	0.181905	-3.15217	0.00162064	0.0179531
ACADVL	2528.34	0.42631	0.135322	3.15034	0.00163082	0.0180446
ZNF417	301.151	0.787638	0.250042	3.15002	0.00163257	0.0180478
GPBP1L1	1498.76	-0.413862	0.131462	-3.14815	0.00164308	0.0181476
PTGER4	42.4908	1.39281	0.443193	3.14268	0.0016741	0.0184571
SLC25A14	31.7737	1.36592	0.434611	3.14286	0.00167303	0.0184571
LEPROT	166.822	0.548273	0.174651	3.13925	0.00169379	0.0186408
RPL32	9529	-0.513308	0.163509	-3.13932	0.00169338	0.0186408
PIGC	296.871	0.571001	0.181966	3.13795	0.00170135	0.0186906
SLC9B2	246.627	-0.525984	0.167612	-3.13811	0.00170039	0.0186906
MIA3	822.341	-0.481479	0.153498	-3.13672	0.00170848	0.0187522
LIN54	824.467	0.575929	0.183625	3.13645	0.00171009	0.018753
LIN7B	22.5416	1.54732	0.493527	3.13524	0.00171715	0.0188138
NPL	248.408	0.522969	0.166864	3.1341	0.0017238	0.0188698
EME1	435.847	0.731451	0.233452	3.1332	0.00172913	0.0189113
BTBD9	134.06	0.636691	0.20323	3.13286	0.00173111	0.0189161
SNORA2C	7.2943	2.77471	0.885859	3.13223	0.00173484	0.0189401
GDI2	4262.12	-0.599159	0.1914	-3.13041	0.00174565	0.0190412
RB1CC1	1280.04	-0.611374	0.195346	-3.12969	0.00174988	0.0190704
APPBP2	839.598	0.500308	0.159964	3.12763	0.00176223	0.0191881
EGLN2	487.125	0.582285	0.186321	3.12517	0.00177702	0.019332
GZMB	2950.22	0.540184	0.172953	3.1233	0.00178832	0.0193864
IL2RB	1615.11	-0.667414	0.213641	-3.124	0.00178409	0.0193864
RPL36	2035.26	-0.445724	0.142688	-3.12377	0.00178553	0.0193864
TFEB	94.0874	0.879584	0.28162	3.1233	0.00178833	0.0193864
LCK	27.3712	1.84244	0.590184	3.12181	0.00179744	0.0194675
MEF2A	729.156	0.553895	0.177442	3.12156	0.00179898	0.0194675
CHSY1	1232.35	-0.522215	0.167311	-3.12122	0.00180102	0.0194725
MID1IP1	367.618	-0.489456	0.156863	-3.12028	0.00180682	0.0195026
ZNF530	169.255	1.11312	0.356742	3.12025	0.00180697	0.0195026
MZT1	983.253	-0.607979	0.19488	-3.11976	0.00180997	0.0195179
CASZ1	133.343	0.7649	0.245314	3.11804	0.00182055	0.0196148
RBL2	995.546	-0.589365	0.189058	-3.11737	0.00182473	0.0196426
MBOAT1	286.235	0.879667	0.282383	3.11515	0.0018385	0.0197642
RUSF1	436.337	-0.385414	0.123727	-3.11503	0.00183924	0.0197642
KARS1	2613.1	-0.610674	0.196091	-3.11424	0.00184422	0.0198004
C6orf120	231.662	-0.503713	0.161804	-3.11312	0.00185123	0.0198584
MCM10	1345.11	0.929137	0.29852	3.11248	0.00185525	0.0198841
APRT	651.346	-0.78682	0.252868	-3.11158	0.00186088	0.0199098
ULK4	49.0975	0.915958	0.294366	3.11163	0.00186059	0.0199098
HSPA4	1796.74	-0.623797	0.200568	-3.11015	0.00186991	0.0199759
SLA2	99.9532	0.726567	0.233616	3.11009	0.0018703	0.0199759
CPSF2	1982.1	-0.369468	0.118835	-3.10909	0.00187664	0.0200262
COASY	406.471	-0.625564	0.201272	-3.10805	0.00188325	0.0200644
TRGV9	70.1594	0.76356	0.245674	3.10802	0.00188348	0.0200644
FBXL4	689.677	-0.513645	0.16528	-3.10772	0.00188535	0.020067
INPP4A	1483.81	-0.599752	0.193025	-3.10713	0.00188916	0.0200901
STK17B	2021.64	-0.546691	0.176198	-3.1027	0.00191761	0.0203751
ZNF532	39.3673	1.34232	0.432716	3.10208	0.00192166	0.0204005
ARL6IP5	1362.63	-0.581877	0.187604	-3.10163	0.0019246	0.0204057
ZNF554	33.4611	1.21524	0.391823	3.10149	0.00192547	0.0204057
NANOS1	15.5926	2.90413	0.93645	3.10121	0.00192732	0.0204077
CNOT7	1321.4	-0.447228	0.144413	-3.09687	0.00195577	0.0206793
ZBTB11	899.612	-0.361994	0.116894	-3.09678	0.00195633	0.0206793
C22orf46P	79.5616	1.11071	0.35871	3.0964	0.00195885	0.0206882
H2AX	997.562	0.981318	0.31698	3.09584	0.00196258	0.0207097
ABRAXAS1	370.536	-1.08711	0.351234	-3.09513	0.00196728	0.0207416
RABEP1	1529.51	-0.48534	0.156845	-3.09439	0.00197218	0.0207754
PPFIBP1	252.495	0.554844	0.179345	3.09372	0.00197661	0.0208043
TMEM67	55.9557	0.758393	0.245278	3.09198	0.00198828	0.0209093
XRCC3	465.163	1.01661	0.328816	3.09172	0.00199002	0.0209097
R3HDM2	152.205	-1.2161	0.39357	-3.08992	0.00200209	0.0210006
RAP1GAP2	50.8448	1.60514	0.519464	3.08999	0.00200166	0.0210006
RBKS	65.6822	0.896	0.290173	3.08782	0.00201631	0.0211318
BLMH	1856.1	-0.663139	0.214822	-3.08692	0.00202241	0.0211596
TMED2-DT	29.8502	1.23804	0.401048	3.08702	0.00202177	0.0211596
PKMYT1	490.895	1.16345	0.376941	3.08656	0.00202487	0.0211673
KIF2A	3636.91	-0.71209	0.230737	-3.08615	0.00202767	0.0211785
PCCA-DT	158.863	1.06967	0.346633	3.0859	0.00202938	0.0211785
LCP2	440.296	-0.788695	0.255635	-3.08523	0.00203392	0.0212079
MBD1	416.486	0.684381	0.221902	3.08416	0.00204128	0.0212486
RPL7A	16937	-0.804103	0.260741	-3.08391	0.002043	0.0212486
TPRN	436.365	0.616687	0.19996	3.08405	0.00204204	0.0212486
ZNF181	110.17	0.996214	0.323108	3.08322	0.00204771	0.0212796
CEP20	662.546	-0.506509	0.164305	-3.08274	0.00205107	0.0212965
TIAL1	943.122	-0.591697	0.19197	-3.08225	0.00205445	0.0213137
DPY19L2	71.8276	0.887352	0.287936	3.08177	0.00205777	0.0213301
POLR3C	599.211	0.683848	0.221922	3.08148	0.00205978	0.0213329
EEF1A1	94495.7	-0.618894	0.200861	-3.0812	0.00206166	0.0213344
SLC66A3	318.01	-0.510813	0.165846	-3.08004	0.00206974	0.0213821
SMUG1	235.042	0.508137	0.164971	3.08015	0.00206896	0.0213821
MIEF1	826.23	-0.43299	0.140681	-3.07782	0.00208522	0.021506
SGO2	306.581	-0.559281	0.181712	-3.07784	0.00208505	0.021506
B4GALNT3	18.2114	1.53079	0.497404	3.07756	0.00208702	0.0215064
CDC25A	715.651	1.25555	0.408114	3.07648	0.00209463	0.0215614
LINC03108	30.3516	1.09797	0.356911	3.0763	0.00209586	0.0215614
C14orf93	105.426	-0.6675	0.217062	-3.07516	0.00210389	0.0215682
CCNG1	1745.2	-0.778787	0.253267	-3.07496	0.00210528	0.0215682
CD93	2461.86	-0.95529	0.31061	-3.07553	0.00210131	0.0215682
DHODH	209.916	-0.962783	0.313009	-3.07589	0.00209872	0.0215682
DSN1	999.251	0.919187	0.298912	3.07511	0.00210427	0.0215682
BLM	793.946	0.800701	0.260563	3.07297	0.00211939	0.0216761
PTGR3	1940.35	-0.491147	0.159836	-3.07283	0.00212042	0.0216761
TARBP1	186.267	-0.651681	0.212085	-3.07273	0.0021211	0.0216761
ABLIM1	667.044	-0.960908	0.312812	-3.07183	0.00212747	0.0217232
TRDMT1	55.8112	-1.18607	0.38615	-3.07153	0.00212966	0.0217275
DNMBP	178.133	0.69176	0.225246	3.07113	0.00213252	0.0217386
NAT1	119.266	1.03861	0.338397	3.06919	0.00214639	0.0218619
GALNT4	483.952	-0.429669	0.140036	-3.06827	0.00215302	0.0218932
SLC2A8	113.399	0.888657	0.289614	3.06842	0.00215193	0.0218932
PTGES3	2003.27	-0.841631	0.274375	-3.06745	0.00215897	0.0219031
SOCS1	62.5477	3.46794	1.13062	3.06728	0.00216015	0.0219031
SUPT7L	841.892	0.691818	0.225557	3.06715	0.00216111	0.0219031
UBE3A	1568.54	-0.339198	0.110576	-3.06756	0.00215812	0.0219031
TSPAN33	252.468	0.47682	0.155519	3.066	0.00216942	0.0219691
VWA7	70.997	1.4232	0.464265	3.0655	0.00217309	0.0219883
ENC1	12.12	2.19559	0.716374	3.06486	0.00217769	0.0220167
PEX5	576.823	-0.523887	0.170954	-3.06448	0.00218046	0.0220266
ICMT	2872.87	0.670761	0.218944	3.06362	0.00218678	0.0220723
MIR22HG	32.6387	1.82638	0.596385	3.06242	0.00219557	0.0221248
ZNF736	503.595	0.554616	0.181101	3.06247	0.00219516	0.0221248
FANCF	303.544	-0.611253	0.199674	-3.06125	0.00220413	0.0221747
RNF187	1821.16	-0.766245	0.250299	-3.06132	0.00220366	0.0221747
H2AC15	298.473	-1.21857	0.398126	-3.06076	0.00220779	0.0221933
NUP98	2348.68	-0.256388	0.0838334	-3.0583	0.00222595	0.0223394
ZNF8-ERVK3-1	146.977	1.25055	0.408887	3.05843	0.00222499	0.0223394
RHOBTB2	184.308	0.497723	0.162806	3.05716	0.00223446	0.0224065
DDIAS	274.514	0.692183	0.226443	3.05676	0.00223741	0.0224179
GIN1	113.383	-0.575894	0.18842	-3.05643	0.0022399	0.0224245
PCYOX1L	318.804	0.487208	0.159441	3.05572	0.00224524	0.0224597
NCAPH2	798.349	0.802364	0.262607	3.05538	0.00224776	0.0224666
EEIG2	440.033	-0.623259	0.204103	-3.05365	0.00226074	0.0225781
CCDC25	701.48	-0.576336	0.188777	-3.05299	0.00226571	0.0226065
PCCB	1085.32	-0.748549	0.245202	-3.05279	0.00226726	0.0226065
FMNL1-DT	169.139	1.06153	0.347967	3.05067	0.00228334	0.0227483
RHOU	393.764	0.614743	0.201574	3.04972	0.00229052	0.022795
TMEM129	359.875	-0.751002	0.246265	-3.04957	0.00229173	0.022795
FCHSD1	163.844	0.683519	0.224254	3.04796	0.00230398	0.0228983
AP1G2	447.93	0.869305	0.285253	3.04749	0.00230764	0.0229027
CCDC102A	188.549	0.582896	0.191275	3.04742	0.00230814	0.0229027
CCDC183-AS1	18.7253	1.84231	0.604963	3.04533	0.00232425	0.0230139
STOM	2846.91	-0.565469	0.18569	-3.04524	0.00232496	0.0230139
UEVLD	291.129	-0.52181	0.171335	-3.04555	0.00232255	0.0230139
SERBP1	4753.56	-0.673315	0.221168	-3.04436	0.00233176	0.0230627
GPS2	456.304	0.847837	0.278564	3.04359	0.0023377	0.0230844
STK4	2739.34	-0.46387	0.152401	-3.04375	0.00233652	0.0230844
ARHGAP30	1504.63	-0.308904	0.101547	-3.04197	0.00235035	0.0231907
IFI44L	375.32	0.762845	0.250856	3.04097	0.00235814	0.0232489
NOL7	432.131	-0.670501	0.220582	-3.03969	0.00236823	0.0233296
RHOA	2954.3	-0.594274	0.195526	-3.03936	0.0023708	0.0233363
CDC7	746.911	0.595705	0.19607	3.03823	0.00237972	0.0233994
TSPOAP1	128.511	-0.711107	0.234066	-3.03807	0.00238102	0.0233994
SLC38A1	6152.88	-0.632379	0.208233	-3.03687	0.00239046	0.0234735
MICB-DT	34.8537	0.990042	0.326117	3.03585	0.00239862	0.0235348
RFPL4A	41.8795	0.991023	0.326536	3.03496	0.00240567	0.0235852
WARS2	121.995	-0.821341	0.270661	-3.03457	0.00240878	0.0235969
EEF2	17123.5	-0.599669	0.197695	-3.0333	0.00241892	0.02365
EXOSC6	627.421	-0.491964	0.16222	-3.03269	0.00242381	0.02365
H2BC15	522.229	-0.777956	0.256447	-3.03359	0.00241661	0.02365
VDAC1	3217.85	-0.752831	0.248209	-3.03306	0.00242089	0.02365
ZNF724	372.072	0.991831	0.327038	3.03277	0.00242321	0.02365
ARHGAP15	727.85	-0.391558	0.129336	-3.02745	0.00246625	0.0239062
CENPE	1046.98	-0.386477	0.127608	-3.02862	0.00245673	0.0239062
CERS4	163.243	-0.579124	0.191316	-3.02705	0.0024695	0.0239062
LYPLA1	1977.04	-0.6189	0.204368	-3.02835	0.00245891	0.0239062
NMNAT1	259.757	0.57115	0.188614	3.02815	0.00246058	0.0239062
ORC4	247.572	-0.459536	0.151808	-3.02709	0.0024692	0.0239062
SPTBN2	82.0692	1.22912	0.405966	3.02764	0.00246469	0.0239062
SUGT1P4-STRA6LP	47.6417	1.41642	0.467772	3.028	0.00246175	0.0239062
TMEM68	237.239	-0.462011	0.152526	-3.02906	0.00245316	0.0239062
ZNF691	73.9611	0.740792	0.24472	3.0271	0.00246914	0.0239062
CYP19A1	19.4052	1.49819	0.495069	3.02622	0.00247633	0.0239535
FOSL2	513.14	0.875652	0.289567	3.024	0.00249453	0.0241105
FAM171A1	22.8884	1.18633	0.392389	3.02334	0.00249998	0.0241442
EEF1A1P6	53.6881	-0.9739	0.322209	-3.02257	0.00250637	0.024187
ACTR3B	77.1173	-0.818063	0.270686	-3.02219	0.00250953	0.0241984
ADCK2	512.1	0.565251	0.187054	3.02186	0.00251225	0.0242058
DOK1	211.628	0.603586	0.19981	3.0208	0.00252111	0.0242342
FSTL3	24.6348	-1.24029	0.410522	-3.02124	0.00251741	0.0242342
STK24	3324.89	-0.455893	0.150917	-3.02082	0.00252092	0.0242342
KHDC1-AS1	24.4737	1.29401	0.428538	3.0196	0.00253112	0.0243114
FOXK1	952.092	-0.723328	0.23958	-3.01914	0.0025349	0.0243287
CLN6	222.715	0.723476	0.239732	3.01786	0.00254567	0.024413
CENPF	4589.09	-0.451926	0.1498	-3.01687	0.00255401	0.0244404
MYB	216.71	1.01849	0.337605	3.01681	0.00255448	0.0244404
NCBP2	757.938	-0.453885	0.15044	-3.01706	0.00255238	0.0244404
SHLD1	65.2523	0.734774	0.24366	3.01558	0.00256491	0.0245211
USP27X	33.9855	1.11403	0.369586	3.01428	0.00257592	0.0246073
CTSW	866.293	0.558822	0.185475	3.01292	0.00258747	0.0246944
RICTOR	1508.2	-0.570802	0.189463	-3.01273	0.00258906	0.0246944
KLF13	2073.29	-0.54975	0.182592	-3.01081	0.00260548	0.0248126
TM7SF2	139.986	0.686927	0.228144	3.01093	0.00260445	0.0248126
ADSS2	950.29	-0.460461	0.152988	-3.00979	0.00261428	0.0248771
CCT8	1802.1	-0.67857	0.225555	-3.00845	0.00262583	0.0249677
DDX50	1041.36	-0.49655	0.165126	-3.00709	0.00263758	0.0250601
TPK1	42.795	-1.0083	0.335401	-3.00625	0.0026449	0.0251102
UBBP4	475.453	-0.525125	0.174721	-3.0055	0.00265143	0.0251436
VIM-AS1	45.6929	-1.06961	0.355898	-3.00538	0.0026525	0.0251436
RPL10	11048.5	-0.533247	0.177449	-3.00508	0.00265514	0.0251492
LRRC8B	93.168	0.821158	0.273323	3.00435	0.00266149	0.0251814
SREBF2-AS1	35.5047	2.48851	0.828337	3.00422	0.00266263	0.0251814
HNRNPC	6155.92	-0.675293	0.224863	-3.00313	0.00267221	0.0252526
CFAP97	942.631	-0.402693	0.134121	-3.00247	0.00267795	0.0252683
MARCKS	310.094	0.436181	0.145274	3.00247	0.00267798	0.0252683
CRY1	492.098	0.371226	0.123662	3.00195	0.00268258	0.0252755
LRRC37A4P	250.428	1.275	0.424728	3.00192	0.00268286	0.0252755
TPI1P2	18.7154	1.63157	0.543733	3.00068	0.00269379	0.0253591
CCNA2	1352.54	-0.634019	0.211538	-2.99719	0.00272484	0.0256318
AMZ2	1353.01	-0.597811	0.199562	-2.99562	0.0027389	0.0256986
GRHL1	76.5569	0.988624	0.330041	2.99546	0.00274029	0.0256986
IL6ST	1221.27	0.49455	0.165088	2.99567	0.00273843	0.0256986
SYF2	598.11	-0.522164	0.17431	-2.9956	0.00273901	0.0256986
ARL16	241.698	0.57209	0.191042	2.99458	0.00274822	0.0257141
CDKN1B	1936.38	-0.463896	0.154906	-2.9947	0.00274718	0.0257141
TCTN1	36.4351	1.19972	0.400603	2.99479	0.00274631	0.0257141
EXTL3	547.038	-0.549155	0.18344	-2.99364	0.0027567	0.0257739
IGFLR1	48.9452	0.963642	0.322091	2.99184	0.00277306	0.025901
RN7SL4P	591.634	1.14144	0.381539	2.99168	0.00277451	0.025901
C4B	30.2102	2.09786	0.701324	2.99129	0.00277805	0.0259144
HSP90AB1	14253.2	-0.953747	0.318932	-2.99044	0.00278577	0.0259668
RNASEL	157.924	0.489438	0.163704	2.98977	0.00279188	0.0259844
TOPORS	297.151	0.677823	0.226698	2.98998	0.00278998	0.0259844
ZBTB14	245.617	-0.49315	0.16498	-2.98914	0.00279762	0.0260181
NLE1	314.667	-0.552066	0.18471	-2.98883	0.00280048	0.026025
ITGA5	44.0464	1.34724	0.450837	2.9883	0.00280533	0.0260504
MLX	393.783	-0.528579	0.176963	-2.98695	0.00281776	0.0261332
USP16	257.136	-0.632807	0.211863	-2.98687	0.0028185	0.0261332
SARS2	271.398	-0.666177	0.223254	-2.98394	0.00284561	0.0263648
C7orf25	17.9664	1.42455	0.47757	2.98293	0.00285507	0.0264324
CPSF6	1435.43	-0.453682	0.152118	-2.98244	0.0028596	0.0264546
MRPL54	159.267	-0.977294	0.327851	-2.98091	0.00287398	0.0265675
CISH	185.903	-0.924014	0.310054	-2.98017	0.00288091	0.0265717
NDRG3	987.067	-0.646631	0.216964	-2.98035	0.00287917	0.0265717
RPL23A	16074.6	-0.499412	0.167556	-2.98056	0.00287719	0.0265717
MBD4	515.055	0.448706	0.150604	2.97937	0.00288838	0.0265809
RPL34	2484.31	-0.64322	0.215887	-2.97942	0.0028879	0.0265809
TMCC2	64.6234	1.07009	0.35912	2.97974	0.00288491	0.0265809
TRAPPC11	717.616	-0.491143	0.164967	-2.97723	0.00290868	0.0267476
PLPBP	518.64	-0.403431	0.135533	-2.97662	0.00291445	0.0267608
ZNF772	342.968	0.869644	0.292153	2.97668	0.00291393	0.0267608
P2RX5	1507.42	0.383893	0.129012	2.97563	0.00292384	0.0268269
TDRD7	338.442	0.570846	0.191857	2.97537	0.0029264	0.0268304
PDE1B	6.26146	2.90259	0.975664	2.97499	0.00293002	0.0268436
RPL8	5795.13	-0.487701	0.163986	-2.97404	0.00293911	0.0269069
IL1RL1	654.589	-0.545065	0.1833	-2.97362	0.0029431	0.0269233
RPL31	5047.29	-0.426271	0.143414	-2.97231	0.00295567	0.0270182
STARD4	1017.88	0.448055	0.150794	2.97131	0.00296531	0.0270863
TMUB2	166.297	0.615242	0.207125	2.97039	0.00297419	0.0271472
MEX3B	63.7697	1.0092	0.339832	2.9697	0.00298091	0.0271884
ZNF517	55.6655	1.08246	0.364553	2.96928	0.002985	0.0272055
PPAT	1295.8	-0.46	0.154941	-2.96888	0.00298891	0.027221
CHST2	14.0163	1.78214	0.60048	2.96787	0.00299875	0.0272703
YWHAE	2799.29	-0.76025	0.25616	-2.96788	0.00299863	0.0272703
RPA2	1313.25	0.768346	0.258992	2.96668	0.00301036	0.0273556
SEPTIN5	13.3683	1.86026	0.627126	2.96633	0.0030138	0.0273666
OGFOD3	345.525	-0.672191	0.2268	-2.96381	0.00303858	0.0275713
CFAP44	11.7381	2.44928	0.826755	2.96252	0.0030513	0.0276309
LARS1	3266.28	-0.363768	0.122793	-2.96246	0.00305189	0.0276309
XPO7	868.811	-0.529926	0.17888	-2.96246	0.00305187	0.0276309
TUBB3	151.539	0.876411	0.295888	2.96197	0.00305674	0.0276545
HMG20A	862.765	-0.3954	0.13352	-2.96136	0.00306284	0.0276656
MARCHF8	254.592	0.562232	0.189868	2.96117	0.00306471	0.0276656
TADA1	243.952	-0.664654	0.224446	-2.96131	0.00306332	0.0276656
PABIR3	99.9655	0.988208	0.333767	2.96077	0.00306871	0.0276814
DBP	122.2	-0.658274	0.222423	-2.95956	0.0030808	0.0277498
RARA	166.265	-0.655769	0.221566	-2.9597	0.00307935	0.0277498
ENOX1	6.04827	-3.6105	1.22106	-2.95685	0.003108	0.0278979
ENTREP3	90.5705	-1.10762	0.37459	-2.95688	0.00310773	0.0278979
HAUS3	367.494	0.542794	0.183589	2.95658	0.00311073	0.0278979
NEMP2-DT	25.7164	1.52343	0.515112	2.95747	0.00310179	0.0278979
SRBD1	493.861	0.496214	0.167841	2.95645	0.00311206	0.0278979
ZNF274	459.784	0.647471	0.219011	2.95634	0.00311312	0.0278979
ZNF747	236.461	0.652989	0.22087	2.95645	0.00311207	0.0278979
VMP1	3144.21	-0.591318	0.200033	-2.9561	0.00311552	0.0278991
RHOB	383.719	2.46754	0.834999	2.95514	0.00312527	0.027966
CMPK2	341.579	1.04148	0.352665	2.95317	0.00314528	0.0281232
RBM5	1252.56	0.595093	0.201524	2.95296	0.0031474	0.0281232
COG7	112.116	-0.565233	0.191522	-2.95126	0.00316477	0.0282578
MYO9B	712.006	0.749339	0.253927	2.95101	0.0031674	0.0282608
SPPL2B	198.795	0.774895	0.262743	2.94925	0.00318545	0.0284013
PTPN3	580.938	-0.790116	0.268013	-2.94804	0.00319791	0.0284918
OTOGL	2.32986	4.46993	1.51878	2.94311	0.00324936	0.0289292
CD86	255.88	0.639861	0.217457	2.94246	0.00325612	0.0289684
USP10	1602.71	-0.48097	0.163514	-2.94147	0.00326659	0.0290406
ICE2	796.83	-0.380044	0.129246	-2.94047	0.0032772	0.0290718
SLC16A6	168.495	0.649183	0.220744	2.94089	0.00327269	0.0290718
SMC2	1719.54	0.498354	0.169474	2.94059	0.00327588	0.0290718
SLC2A4RG	322.94	0.738196	0.251092	2.93994	0.00328273	0.0290854
XYLB	55.8868	0.943455	0.320917	2.93987	0.00328346	0.0290854
CARD6	11.3156	2.02103	0.688098	2.93712	0.00331277	0.029324
TUBE1	128.848	-0.716553	0.244113	-2.93533	0.0033319	0.0294509
VIM	6434.08	0.406498	0.13848	2.93542	0.00333091	0.0294509
RSAD1	209.641	-0.822352	0.280243	-2.93443	0.00334165	0.0295159
CNP	685.419	0.550923	0.187807	2.93345	0.00335218	0.0295877
CORO1A	4168.92	-0.576539	0.196604	-2.93249	0.00336261	0.0296584
TPM1	87.715	0.692739	0.236261	2.93209	0.00336689	0.029675
MMS22L	754.919	0.581771	0.198522	2.93052	0.00338398	0.0297616
UPP1	239.828	0.864025	0.294837	2.93052	0.00338394	0.0297616
ZNF140	314.87	0.856282	0.292171	2.93076	0.00338136	0.0297616
PFN4	10.2226	2.12575	0.725477	2.93014	0.00338815	0.029777
SKIL	597.259	1.09754	0.374615	2.92977	0.0033921	0.0297904
RN7SL2	434840	1.00707	0.343784	2.92936	0.0033966	0.0298087
HDHD3	244.256	0.59119	0.201884	2.92837	0.00340741	0.0298779
RXRA	36.1287	1.07326	0.366527	2.9282	0.00340935	0.0298779
PREP	618.78	-0.866518	0.296045	-2.92698	0.0034227	0.0299736
CENPM	478.831	0.877778	0.299925	2.92666	0.00342626	0.0299834
PGAP6	403.106	0.456746	0.156123	2.92555	0.00343848	0.030069
CFDP1	118.221	-0.752284	0.257236	-2.92449	0.00345022	0.0301502
ELP4	351.806	-0.354748	0.12135	-2.92334	0.00346298	0.0302403
CDV3	2741.85	-0.458386	0.156858	-2.9223	0.00347452	0.0303017
TXNDC16	408.25	0.48834	0.16711	2.92227	0.00347495	0.0303017
BVES	42.0683	1.11137	0.380463	2.9211	0.00348802	0.0303942
BAZ2B	28.8569	1.56506	0.536006	2.91986	0.00350188	0.0304718
NEPRO	450.843	-0.484728	0.166004	-2.91998	0.00350051	0.0304718
VPS25	321.447	-0.552544	0.18927	-2.91934	0.00350775	0.0305013
WDR12	346.719	-0.648673	0.222338	-2.9175	0.00352845	0.0306596
STX8	246.946	-0.477927	0.163845	-2.91695	0.00353469	0.030689
TONSL	615.548	1.08361	0.37151	2.91676	0.00353682	0.030689
ACSF2	394.812	0.466352	0.159905	2.91644	0.00354055	0.0306998
SENP6	1370.12	-0.356032	0.122148	-2.91475	0.00355968	0.0308439
RABGEF1	489.349	0.374366	0.128477	2.91388	0.00356963	0.0309083
LARP1B	353.183	-0.491902	0.168827	-2.91365	0.00357232	0.0309099
AUNIP	358.446	0.680209	0.233515	2.91291	0.00358075	0.0309611
ARL2	655.853	-0.594726	0.204259	-2.91163	0.00359554	0.0310308
ATP8A1	1448.08	-0.69644	0.239209	-2.91143	0.00359774	0.0310308
CPNE1	1655.55	-0.609792	0.209458	-2.91129	0.0035994	0.0310308
RPL10A	5689.2	-0.572461	0.196647	-2.91111	0.00360143	0.0310308
ZNF330	294.151	-0.600842	0.206384	-2.91129	0.00359945	0.0310308
GCLC	618.328	-0.376763	0.129509	-2.90916	0.003624	0.0311816
ZNF714	678.896	0.622621	0.214013	2.90926	0.00362281	0.0311816
TIAM1	731.663	0.494538	0.170048	2.90822	0.0036349	0.0312317
XAF1	826.133	0.777805	0.26743	2.90844	0.00363239	0.0312317
GALNT3	63.0978	0.734577	0.252631	2.9077	0.00364093	0.0312616
ISG20	274.904	0.432437	0.148849	2.9052	0.00367021	0.0314911
PRKX	882.634	-0.914392	0.314779	-2.90487	0.00367411	0.0315026
VWA8	618.862	-0.917816	0.316058	-2.90394	0.00368493	0.0315734
CALCOCO2	1170.32	-0.547197	0.188542	-2.90226	0.0037048	0.0317046
MED4	375.312	-0.493171	0.169929	-2.90221	0.00370539	0.0317046
ATAD2	3550.79	0.650531	0.224186	2.90175	0.00371081	0.0317068
CEP164	309.604	0.54876	0.189103	2.90191	0.00370898	0.0317068
LCT-AS1	4.65759	3.51314	1.21125	2.90044	0.00372644	0.0317815
NEB	23.3782	2.21527	0.76379	2.90036	0.0037273	0.0317815
NKRF	204.378	-0.525561	0.181185	-2.90069	0.00372339	0.0317815
VPS29	692.362	0.512843	0.176848	2.89991	0.00373265	0.0318051
GBP3	276.114	0.561998	0.193836	2.89935	0.00373942	0.0318207
GK	229.594	0.636588	0.219564	2.89933	0.00373965	0.0318207
IQCH-AS1	57.8912	-0.82695	0.285272	-2.89881	0.00374584	0.0318513
E2F5	62.1431	-0.941817	0.325144	-2.89662	0.00377212	0.0320113
NUFIP1	256.284	-0.584651	0.201841	-2.89659	0.00377246	0.0320113
SIMC1P1	24.5648	1.84736	0.637721	2.89682	0.00376963	0.0320113
XXYLT1	329.463	-0.470803	0.162564	-2.8961	0.0037783	0.0320388
EXOC2	774.236	-0.527069	0.182014	-2.89576	0.00378237	0.0320512
GSTK1	749.121	0.327204	0.113027	2.89491	0.00379267	0.0321163
SMYD5	202.958	-0.668333	0.230992	-2.89331	0.00381201	0.0322579
LSM14A	974.378	-0.553056	0.191216	-2.8923	0.00382429	0.0323396
FOXRED2	294.034	0.538784	0.186303	2.89198	0.00382824	0.0323508
NFYB	601.99	-0.445895	0.154226	-2.89119	0.0038379	0.0324101
TBC1D2	55.1666	1.10807	0.38335	2.89048	0.00384659	0.0324612
YWHAG	1425.33	-0.640852	0.221868	-2.88844	0.00387158	0.0326497
TICRR	538.672	1.10047	0.381023	2.88819	0.00387468	0.0326534
ATXN7L1	34.791	1.26994	0.439828	2.88735	0.00388508	0.032674
CDKN2B	52.0747	1.38838	0.480822	2.88752	0.00388298	0.032674
PDE3A	20.4059	1.14047	0.39498	2.8874	0.00388434	0.032674
KLRD1	4099.23	-0.509305	0.176462	-2.88621	0.00389918	0.0327701
ANXA5	982.23	0.570491	0.19775	2.88491	0.0039153	0.0328832
DGCR8	435.178	0.834311	0.28962	2.88071	0.00396781	0.0333015
HLA-DOA	153.02	0.665825	0.231167	2.88028	0.00397328	0.0333247
SMAD7	288.145	-0.440658	0.153058	-2.87903	0.00398895	0.0334333
HLA-DRB1	484.103	0.553883	0.192466	2.87783	0.00400427	0.0335226
UQCC1	550.529	-0.346222	0.120309	-2.87776	0.00400506	0.0335226
CARS1	1172.82	-0.454668	0.158054	-2.87666	0.00401907	0.033617
RFX5-AS1	19.0336	1.31395	0.4569	2.8758	0.00403009	0.033681
RPS17	5277.6	-0.447243	0.155529	-2.87563	0.00403219	0.033681
XRCC4	221.395	-0.503829	0.175274	-2.87452	0.00404648	0.0337774
CRMA	31.1677	1.13079	0.393424	2.87422	0.0040503	0.0337863
DOK4	153.373	0.618673	0.215313	2.87336	0.00406128	0.0338321
RPL14	4309.95	-0.532121	0.185186	-2.87345	0.00406019	0.0338321
MATN4	96.9136	0.887879	0.309031	2.87311	0.00406454	0.0338363
DCT	36.5106	1.06182	0.369649	2.87252	0.00407218	0.033877
ACTG1	14116.5	-0.721457	0.251187	-2.8722	0.00407631	0.0338884
BRSK1	62.1797	0.967731	0.336987	2.87171	0.00408251	0.0339171
B4GALT7	146.474	0.6314	0.219887	2.87147	0.00408566	0.0339203
ANKRD26	440.701	0.589407	0.205322	2.87065	0.00409629	0.0339628
TMPRSS15	91.5158	-0.980888	0.341689	-2.87071	0.00409557	0.0339628
HHAT	6.44993	4.04281	1.40926	2.86874	0.00412105	0.034145
ETFA	1456.36	-0.639918	0.223145	-2.86772	0.00413437	0.0342323
COA4	296.572	-0.712225	0.248439	-2.8668	0.00414641	0.0343089
NHLRC3	578.302	0.403134	0.140698	2.86525	0.00416685	0.0344549
AVEN	154.612	0.698719	0.243949	2.8642	0.00418064	0.0345457
PPP6R1	1291.19	-0.400768	0.139946	-2.86372	0.00418695	0.0345747
AIFM1	353.862	-0.525048	0.183488	-2.86148	0.00421668	0.0346121
AVL9	719.533	-0.574275	0.2007	-2.86135	0.00421835	0.0346121
BICRAL	261.994	-0.965853	0.337511	-2.86169	0.00421385	0.0346121
IL15RA	196.238	-0.540237	0.188753	-2.86214	0.00420792	0.0346121
KPNA5	134.714	-0.698265	0.243994	-2.86182	0.0042122	0.0346121
METTL5	387.06	-0.497771	0.173995	-2.86084	0.00422525	0.0346121
PLEKHA8P1	16.3111	1.9847	0.693546	2.86167	0.00421412	0.0346121
QSOX2	1066.97	-0.496569	0.173574	-2.86085	0.00422508	0.0346121
RBM27	958.398	-0.452741	0.158213	-2.8616	0.00421515	0.0346121
RPL26	10232.6	-0.437991	0.152993	-2.86282	0.00419883	0.0346121
VPS45	418.723	0.533235	0.186385	2.86094	0.00422389	0.0346121
ZFP14	150.042	-0.551839	0.192874	-2.86113	0.00422135	0.0346121
HOOK2	133.786	0.656528	0.229513	2.86053	0.00422938	0.034623
APH1B	188.368	0.513248	0.179512	2.85913	0.00424803	0.0346982
C2CD3	335.804	0.924901	0.323506	2.859	0.00424985	0.0346982
EML2	302.593	-0.742209	0.259598	-2.85907	0.0042489	0.0346982
SURF1	211.806	-0.467324	0.163425	-2.85957	0.00424222	0.0346982
ARHGAP33	67.9075	1.88592	0.659698	2.85876	0.00425305	0.0347013
GART	1902.84	-0.554648	0.194036	-2.85849	0.00425665	0.0347076
NUDCD3	409.313	-0.364597	0.12756	-2.85825	0.00425986	0.0347108
FBXO5	550.885	0.654108	0.228941	2.85711	0.00427518	0.0348126
LRRC37B	1542.55	0.889081	0.311371	2.85537	0.00429861	0.0349571
TRAF3IP1	105.991	0.609504	0.213447	2.85553	0.00429649	0.0349571
UIMC1	576.294	-0.348908	0.122242	-2.85423	0.00431415	0.0350603
AZGP1	21.7437	1.78836	0.626653	2.85383	0.0043196	0.0350814
ARL5A	919.486	-0.465506	0.163192	-2.85251	0.00433759	0.0351722
NPAT	613.216	0.603875	0.211714	2.85232	0.00434018	0.0351722
SCN2A	14.507	1.59093	0.557796	2.85217	0.00434221	0.0351722
SMTN	84.0993	0.951091	0.333448	2.85229	0.00434049	0.0351722
SHC1	320.426	-0.43353	0.152052	-2.85119	0.00435556	0.0352571
ATAD1	848.171	-0.41094	0.144164	-2.85051	0.00436493	0.0352726
LTA4H	1963.02	-0.580074	0.203504	-2.85043	0.00436607	0.0352726
MDM4	414.648	-1.00565	0.352801	-2.85048	0.0043653	0.0352726
HECTD2	138.966	0.845456	0.296708	2.84945	0.00437943	0.0353341
NTN1	6.08909	2.51293	0.881875	2.84953	0.00437832	0.0353341
GZMH	333.353	0.907857	0.318813	2.84762	0.00440474	0.035466
NAB1	547.309	0.438639	0.154047	2.84744	0.0044073	0.035466
RNF220	381.116	-0.535542	0.188055	-2.84779	0.00440237	0.035466
SOX1-OT	23.2801	-1.33341	0.468251	-2.84764	0.00440449	0.035466
CYP4V2	345.158	0.767861	0.269755	2.84652	0.00442002	0.0355218
NCDN	525.778	0.449976	0.158074	2.84662	0.00441862	0.0355218
PARP9	984.091	0.481636	0.169317	2.84458	0.00444703	0.0357156
IL9R	12.4509	3.54923	1.24806	2.8438	0.00445784	0.0357557
PMS2P7	25.716	1.47378	0.518226	2.84389	0.00445662	0.0357557
NUMA1	1672.25	0.652987	0.229671	2.84314	0.00446713	0.0358069
RPL21	7322.76	-0.481779	0.169467	-2.8429	0.00447044	0.0358101
ACYP2	69.8971	0.831729	0.292683	2.84174	0.00448687	0.0359183
RN7SL1	428308	1.04479	0.36778	2.84079	0.00450019	0.0360015
DEF6	736.705	-0.404619	0.142461	-2.8402	0.00450851	0.0360447
TMEM217	13.5161	1.95782	0.68989	2.83787	0.0045415	0.0362848
PAG1	1854.2	0.52894	0.186456	2.8368	0.0045568	0.0363834
SEPTIN9	4702.04	-0.308529	0.108795	-2.83586	0.00457018	0.0364666
RAB37	1077.1	-0.487134	0.171809	-2.83532	0.00457797	0.0365051
ZNF519	249.405	0.584517	0.206183	2.83494	0.00458347	0.0365253
HNRNPA1L3	39.0089	-1.08703	0.383583	-2.83388	0.00459866	0.0366226
CKAP5	3815.87	-0.545745	0.19263	-2.83313	0.00460952	0.0366854
THG1L	184.798	-0.659272	0.232931	-2.83033	0.00464993	0.036983
C21orf58	247.455	1.08106	0.38199	2.83009	0.00465356	0.036988
SUMF2	507.023	-0.384571	0.135904	-2.82972	0.00465881	0.0370058
EIF3G	1714.38	-0.503627	0.178006	-2.82927	0.00466543	0.0370345
CD160	4.62938	3.51325	1.24238	2.82783	0.00468641	0.0370938
KICS2	107.642	-0.900646	0.318472	-2.82802	0.00468367	0.0370938
LINC02964	276.948	1.43502	0.507483	2.82773	0.00468798	0.0370938
RNASEH2A	724.844	0.697632	0.246659	2.82833	0.00467915	0.0370938
TEX261	487.312	0.405237	0.143295	2.82799	0.00468409	0.0370938
URB1	691.619	-0.434446	0.153669	-2.82715	0.00469645	0.037137
CCDC71L	175.788	0.461613	0.163301	2.82675	0.00470224	0.0371589
CLNS1A	1058.89	-0.611823	0.216479	-2.82624	0.00470976	0.0371944
DSCC1	330.67	0.936002	0.331243	2.82573	0.00471734	0.0372304
BTF3L4	468.956	-0.678563	0.240213	-2.82484	0.00473049	0.0373102
SMIM27	33.7386	-0.79308	0.280809	-2.82426	0.00473893	0.0373528
XBP1	2694.36	-0.540793	0.191525	-2.82362	0.00474851	0.0374044
MMAA	18.9708	-1.27249	0.450727	-2.8232	0.00475474	0.0374295
PIGO	132.049	-0.619767	0.219603	-2.82222	0.00476931	0.0375202
GAPDH	36602	-0.597446	0.211728	-2.82177	0.00477594	0.0375484
RGPD8	330.676	0.600767	0.21304	2.81997	0.00480281	0.0377355
DCLRE1B	195.104	0.87019	0.308607	2.81974	0.00480626	0.0377385
PBX3	294.736	0.525074	0.186233	2.81945	0.00481056	0.0377482
TAF7	950.079	-0.3371	0.119577	-2.81911	0.00481577	0.037765
GEMIN8	94.1896	-0.602374	0.213823	-2.81716	0.00484497	0.0379456
TEDC2	221.902	0.940146	0.333713	2.81723	0.00484403	0.0379456
APOLD1	654.305	-0.637741	0.226432	-2.81648	0.0048553	0.0379781
TCTA	178.739	0.923646	0.327926	2.81663	0.00485305	0.0379781
CCDC144BP	22.5487	1.67857	0.596116	2.81585	0.0048648	0.0380041
RHNO1	651.342	0.560552	0.199069	2.81587	0.0048646	0.0380041
WDFY1	1237.15	-0.408283	0.145067	-2.81444	0.00488621	0.0381472
C1orf122	150	0.591496	0.210228	2.8136	0.00489903	0.038223
INTS2	785.231	-0.474472	0.168713	-2.8123	0.00491881	0.038353
PGK1	6859.17	-1.01802	0.362129	-2.8112	0.00493566	0.03846
COQ6	235.683	0.614259	0.21856	2.81048	0.00494673	0.0384908
KCMF1	363.958	-0.43059	0.153217	-2.81033	0.004949	0.0384908
RAD54L	334.345	0.72208	0.25692	2.81052	0.00494612	0.0384908
ABCB1	1095.6	0.694624	0.247208	2.80987	0.0049561	0.0385148
ERVK3-1	412.184	0.845895	0.301059	2.80973	0.00495834	0.0385148
LDLR	1286.52	-0.554737	0.197474	-2.80916	0.00496705	0.0385581
AOPEP	119.457	0.87649	0.312113	2.80824	0.00498126	0.0386197
KRT86	378.801	0.579435	0.206323	2.80839	0.00497906	0.0386197
PRMT5-AS1	9.76151	2.52561	0.899496	2.8078	0.00498808	0.0386482
C12orf76	124.529	-0.478403	0.17042	-2.80721	0.00499731	0.038671
GORAB	140.712	0.762144	0.271478	2.80739	0.00499441	0.038671
APBB1	903.782	0.321449	0.114524	2.80683	0.00500313	0.0386917
CHAF1B	322.071	0.925948	0.330103	2.80503	0.00503117	0.0388841
ANKZF1	721.339	-0.541525	0.193082	-2.80463	0.00503738	0.0388939
ITCH	2012.8	-0.369273	0.131669	-2.80455	0.00503876	0.0388939
CRTAM	6.90267	2.44989	0.873749	2.80388	0.0050492	0.0389286
HSPA4L	3.85035	4.15605	1.48226	2.80385	0.00504958	0.0389286
NOL10	632.173	-0.431922	0.154064	-2.80353	0.00505473	0.0389439
ZNF691-DT	12.5155	1.77409	0.632911	2.80306	0.00506204	0.0389758
DSE	18.3576	1.43273	0.511206	2.80265	0.00506853	0.0390013
ZNF583	60.0425	1.18986	0.424634	2.80209	0.00507724	0.039044
GNL3	1684.44	-0.740467	0.264533	-2.79915	0.00512367	0.0393764
H3C12	607.01	-1.83199	0.654711	-2.79817	0.0051393	0.0394718
PTCD3	1538.2	-0.400277	0.1432	-2.79523	0.00518625	0.0398076
HIC1	299.753	-0.542105	0.194009	-2.79422	0.00520244	0.039907
CCT4	4094.1	-0.812483	0.290913	-2.79287	0.00522422	0.0399279
EEF1G	17304.5	-0.525911	0.18824	-2.79383	0.0052088	0.0399279
MAP4K3-DT	61.6042	0.670773	0.240175	2.79285	0.00522463	0.0399279
NEIL2	179.101	-0.617894	0.221232	-2.79297	0.00522261	0.0399279
PTPRJ	529.36	-1.17863	0.421955	-2.79326	0.00521802	0.0399279
SPG11	1482.11	-0.637943	0.228406	-2.79302	0.00522179	0.0399279
ADAM9	918.711	-0.434081	0.155488	-2.79174	0.00524261	0.0400404
RAB35-AS1	40.5832	-0.854553	0.30629	-2.79001	0.00527057	0.040229
CYFIP2	2358.15	-0.571796	0.204987	-2.78942	0.00528022	0.0402776
CCDC157	33.1059	1.3834	0.496091	2.78861	0.00529356	0.040354
CYSLTR2	17.2224	1.68781	0.605297	2.78841	0.00529679	0.040354
ICE1	908.363	-0.33984	0.121954	-2.78662	0.00532611	0.0405113
UACA	19.188	1.32553	0.475688	2.78655	0.00532731	0.0405113
ZNF652	1267.58	-0.939793	0.337215	-2.78692	0.0053211	0.0405113
CELF2	3495.44	-0.868259	0.311721	-2.78537	0.0053466	0.0405948
H2BC27P	77.6544	-0.874474	0.314021	-2.78477	0.00535662	0.0405948
MRPL9	657.307	-0.480318	0.172469	-2.78495	0.00535365	0.0405948
PURPL	208.071	-1.07623	0.386432	-2.78503	0.00535225	0.0405948
SLFN11	1692.67	0.497795	0.178762	2.78468	0.00535809	0.0405948
SPATA24	25.3496	-1.06803	0.383467	-2.7852	0.00534946	0.0405948
TWF1	711.5	-0.499743	0.179512	-2.78389	0.00537109	0.0406682
RGS9	183.69	0.547703	0.196783	2.78329	0.00538114	0.0407193
RPS15A	7010.37	-0.437671	0.157272	-2.78289	0.00538769	0.0407373
RSBN1L	695.444	-0.41338	0.148567	-2.78245	0.00539499	0.0407373
STN1	398.319	-0.503657	0.181011	-2.78247	0.00539476	0.0407373
TRIM36	15.54	1.23951	0.44549	2.78234	0.00539677	0.0407373
MAPK11	46.6361	1.21376	0.436331	2.78173	0.00540698	0.0407894
ESD	962.875	-0.56847	0.204401	-2.78115	0.00541665	0.0408123
TRIM5	443.36	0.328117	0.117975	2.78124	0.00541523	0.0408123
DHRS7B	323.968	0.491235	0.176668	2.78055	0.00542677	0.0408187
PREX1	5155.58	-0.541596	0.194769	-2.7807	0.00542411	0.0408187
SFXN2	188.855	0.761873	0.274005	2.7805	0.00542745	0.0408187
RABL3	148.177	-0.739431	0.266126	-2.7785	0.00546109	0.0410466
ADAT2	163.461	-0.617646	0.222348	-2.77784	0.00547221	0.041105
DIMT1	450.019	-0.561812	0.202311	-2.77698	0.00548673	0.0411412
MCTP2	1177.28	-0.598219	0.215405	-2.77718	0.0054832	0.0411412
NSA2	943.533	-0.435835	0.156947	-2.77696	0.00548705	0.0411412
RPL7	11587.4	-0.573603	0.206585	-2.7766	0.00549311	0.0411501
SYNJ2	25.0346	1.13501	0.408794	2.77649	0.00549492	0.0411501
CDK8	622.629	-0.446943	0.161008	-2.77591	0.00550469	0.0411731
ILF3	1974.23	-0.430067	0.15492	-2.77606	0.00550218	0.0411731
OSBPL3	420.213	0.441312	0.159001	2.77554	0.00551104	0.0411955
PTMA	8093.22	-0.826988	0.298008	-2.77505	0.00551931	0.0412323
NUBP1	156.283	-0.671062	0.24188	-2.77437	0.00553095	0.0412692
PPM1A	752.13	-0.615425	0.221814	-2.7745	0.0055286	0.0412692
RAB9A	299.264	0.585389	0.211035	2.77389	0.00553908	0.0413048
H4C6	3527.68	-0.811869	0.292741	-2.77334	0.00554839	0.0413491
PDIK1L	492.802	-0.478877	0.17298	-2.7684	0.00563331	0.0419566
EVI2B	363.142	-0.966857	0.349386	-2.7673	0.00565224	0.0420355
SLC41A2	566.204	0.431532	0.155946	2.76719	0.00565416	0.0420355
TRAM2	237.657	0.597045	0.215733	2.76752	0.00564842	0.0420355
EDARADD	23.6658	1.42298	0.514273	2.76697	0.00565799	0.0420386
SLC31A2	42.3393	1.11156	0.401818	2.76634	0.00566898	0.0420948
STRAP	1167.4	-0.572354	0.20692	-2.76606	0.00567374	0.0421047
CDH24	77.4181	0.867792	0.313794	2.76548	0.00568384	0.0421233
CORO6	40.5986	-0.788996	0.285317	-2.76533	0.00568651	0.0421233
UTP18	679.971	-0.637869	0.230663	-2.76537	0.00568578	0.0421233
GOLGA8A	536.265	1.3158	0.475954	2.76456	0.00570005	0.0421982
LNCATV	37.1371	1.07147	0.387631	2.76416	0.00570696	0.042224
MLLT3	397.952	-0.510587	0.18474	-2.76381	0.00571306	0.0422437
SHARPIN	156.411	0.656288	0.237775	2.76012	0.00577805	0.0426985
EIF2S3	5650.91	-0.500668	0.181413	-2.75982	0.00578323	0.0427112
SLMAP	581.52	-0.418397	0.151621	-2.75949	0.00578919	0.0427296
ROM1	145.043	0.707116	0.256288	2.75907	0.00579658	0.0427585
TBCA	800.171	-0.571565	0.207215	-2.75832	0.00580987	0.0428308
RAB30	83.2574	0.76247	0.276463	2.75795	0.00581656	0.0428545
CCDC93	414.026	0.630748	0.228725	2.75767	0.00582148	0.0428651
ZNF710	119.82	0.663079	0.240468	2.75745	0.00582542	0.0428684
STBD1	193.29	0.811576	0.294419	2.75654	0.00584172	0.0429627
BTN3A3	250.112	-0.599205	0.21743	-2.75585	0.00585397	0.0430271
GUSBP11	171.65	1.03143	0.374402	2.75487	0.00587147	0.0431299
PLCB3	276.742	0.469653	0.17057	2.75344	0.00589727	0.0432678
POLR1B	995.62	-0.643514	0.233709	-2.75349	0.00589644	0.0432678
DAZAP2	589.022	-0.484014	0.175808	-2.75308	0.00590381	0.0432899
ZNF79	147.994	0.888335	0.322757	2.75234	0.00591719	0.0433622
RPL29P11	454.281	-0.538642	0.195756	-2.75159	0.00593063	0.0434348
BABAM2	416.06	-0.398558	0.144872	-2.75111	0.00593943	0.0434733
ZC3H11A	1807.43	-0.440193	0.160037	-2.75057	0.00594922	0.0435191
RPS2P46	244.151	-0.668562	0.243096	-2.75019	0.00595604	0.0435431
TJP2	28.5878	-1.10911	0.403341	-2.7498	0.00596311	0.0435689
ZBTB38	293.714	0.436229	0.158789	2.74722	0.00601026	0.0438874
LEMD2	382.171	-0.452885	0.164881	-2.74674	0.0060191	0.0438998
SLC25A29	284.623	0.684044	0.249022	2.74692	0.00601578	0.0438998
HEATR1	1759.05	-0.436263	0.158845	-2.74647	0.00602412	0.0439104
CACNA1I	58.8949	1.38892	0.505846	2.74573	0.00603765	0.043957
RPL23	3821.15	-0.540948	0.197009	-2.7458	0.00603644	0.043957
CACNB1	80.7647	0.904548	0.329616	2.74425	0.00606494	0.0440684
MIR4280HG	17.8239	1.3682	0.49853	2.74447	0.00606093	0.0440684
SART3	1136.11	-0.378735	0.138033	-2.7438	0.00607319	0.0440684
SLC35D1	627.771	0.735691	0.268143	2.74366	0.00607592	0.0440684
SLC4A10	298.331	-0.667226	0.243136	-2.74425	0.00606499	0.0440684
XYLT1	869.559	-0.93547	0.340916	-2.74399	0.00606971	0.0440684
ZNF85	85.7002	0.94784	0.34548	2.74354	0.00607803	0.0440684
IPO7	1761.39	-0.604947	0.220639	-2.74179	0.00611054	0.044278
ANKRD40	739.226	-0.345468	0.126039	-2.74096	0.00612608	0.0442891
CEP295	751.846	0.766459	0.279645	2.74083	0.00612843	0.0442891
GLRX2	230.267	0.764293	0.278823	2.74114	0.0061226	0.0442891
PRPF40B	91.4767	-0.724929	0.264501	-2.74074	0.00613006	0.0442891
TBC1D13	234.916	0.638316	0.232894	2.7408	0.00612899	0.0442891
ARMCX3	129.636	0.580463	0.211833	2.74019	0.00614039	0.0443376
AFG2A	459.775	-0.313349	0.114383	-2.73947	0.00615377	0.0443821
PIM3	664.889	-0.451168	0.164691	-2.73948	0.00615368	0.0443821
CASK	388.686	-0.722937	0.264094	-2.73742	0.00619234	0.0446342
WDR36	1400.1	-0.518096	0.189309	-2.73678	0.0062044	0.0446949
RNF141	420.336	-0.3266	0.119407	-2.73518	0.00623464	0.0448602
S1PR1	9.36877	1.84779	0.675547	2.73525	0.00623338	0.0448602
DMXL1	1390.37	0.480135	0.175587	2.73445	0.00624851	0.0449075
MRPS9	482.903	-0.558581	0.204275	-2.73445	0.00624843	0.0449075
PPA2	399.545	-0.575906	0.210675	-2.73362	0.00626422	0.0449679
SARM1	191.065	0.604984	0.221297	2.73381	0.0062607	0.0449679
MDH2	1227.83	-0.680186	0.249017	-2.73149	0.00630485	0.0452332
EEF1A1P5	385.402	-0.524604	0.192104	-2.73084	0.0063173	0.0452961
H2AC19	2776.56	-1.00732	0.369084	-2.72924	0.00634811	0.0454904
GIMAP2	535.773	-0.590357	0.216347	-2.72875	0.00635747	0.0455045
PRKCQ	1056.42	-0.512665	0.187863	-2.72894	0.00635389	0.0455045
ZNF446	41.2174	0.857798	0.314398	2.72838	0.00636464	0.0455294
MFNG	1387.75	-0.516906	0.189489	-2.72789	0.00637411	0.0455706
ASB2	1001.42	-0.624208	0.228858	-2.72749	0.00638189	0.0455998
DOCK10	3055.06	-0.464652	0.170419	-2.72652	0.00640052	0.0456616
FAM78A	925.284	-0.539734	0.197961	-2.72647	0.00640167	0.0456616
RPL29	4014.68	-0.583884	0.214144	-2.72659	0.00639921	0.0456616
ZNF672	297.661	0.658768	0.24164	2.72624	0.00640609	0.0456666
SEPTIN8	784.191	0.344084	0.126234	2.72577	0.00641513	0.0457046
ZNF646	391.642	0.686257	0.251927	2.72403	0.00644897	0.0459191
OSCP1	17.3406	1.3401	0.492048	2.72351	0.00645923	0.045939
POLI	78.5298	-0.624146	0.229164	-2.72358	0.00645779	0.045939
ACTB	11385.8	-0.667175	0.245012	-2.72303	0.0064687	0.0459797
TARS2	467.107	-0.431989	0.158688	-2.72226	0.00648373	0.0460599
RPUSD4	383.308	-0.548742	0.201604	-2.72188	0.00649108	0.0460855
RPL18	4312.1	-0.523347	0.192312	-2.72134	0.00650174	0.0461346
PTPN11	3832.21	-0.551312	0.202641	-2.72063	0.00651567	0.0462068
CAMLG	659.154	-0.337392	0.124078	-2.7192	0.00654408	0.0463548
SMC1B	49.4289	1.20556	0.443336	2.7193	0.00654211	0.0463548
HYAL3	52.2341	0.94104	0.346127	2.71877	0.0065526	0.046379
IFFO2	620.048	-0.344003	0.126535	-2.71864	0.00655503	0.046379
TOMM22-DT	24.0109	1.06854	0.393118	2.71811	0.00656554	0.0464267
KRCC1	371.024	0.801006	0.29476	2.71748	0.00657808	0.0464886
RPL27	2522.29	-0.494374	0.181943	-2.71719	0.00658383	0.0465025
SPRYD3	114.466	-0.780589	0.287316	-2.71683	0.006591	0.0465265
D2HGDH	160.725	1.05369	0.388055	2.71531	0.00662146	0.0467147
HSPD1	6713.24	-0.83698	0.308333	-2.71453	0.00663698	0.0467974
GPR18	50.9915	0.773954	0.285191	2.71382	0.00665133	0.0468186
SEC23IP	491.12	-0.439742	0.162039	-2.71381	0.00665141	0.0468186
TRG-AS1	298.541	-0.541101	0.199377	-2.71396	0.00664844	0.0468186
SSB	1010.12	-0.698145	0.257279	-2.71357	0.00665631	0.0468263
TRIM35	411.937	0.581375	0.214278	2.71318	0.00666401	0.0468537
RAB3GAP2	862.735	-0.333268	0.122848	-2.71286	0.00667061	0.0468733
BZW2	864.412	-0.71169	0.262368	-2.71257	0.00667643	0.0468794
TSPOAP1-AS1	184.771	0.887398	0.327182	2.71225	0.0066829	0.0468794
TTLL6	6.81298	2.67105	0.984791	2.7123	0.00668183	0.0468794
PPM1L	4.49881	2.84349	1.04881	2.71116	0.00670473	0.0469791
TMEM44-AS1	63.6358	1.10792	0.408651	2.71116	0.00670476	0.0469791
NRBP2	8.81425	2.32483	0.857788	2.71026	0.00672309	0.0470447
PACSIN1	34.7592	-1.25765	0.464055	-2.71013	0.00672559	0.0470447
WASHC2C	432.257	0.454608	0.167737	2.71025	0.00672329	0.0470447
BMP1	117.178	0.579104	0.21375	2.70926	0.00674332	0.0471191
DMGDH	50.5371	-1.66913	0.616132	-2.70905	0.00674772	0.0471191
RPL24	4054.47	-0.616584	0.227587	-2.70923	0.00674395	0.0471191
PRKCA	1775.5	-1.14905	0.424193	-2.70879	0.00675284	0.0471282
RIC8A	541.623	0.542021	0.200141	2.7082	0.006765	0.0471863
ITGAM	57.9566	0.843851	0.311639	2.70779	0.00677338	0.0472015
OSBPL7	298.407	0.748153	0.276304	2.70771	0.00677486	0.0472015
MRPL42	900.349	-0.495041	0.182931	-2.70616	0.00680665	0.0473961
ZHX3	296.312	0.566434	0.209443	2.70448	0.00684113	0.0476093
LRRC37A3	23.8804	1.24679	0.461145	2.70367	0.00685777	0.0476981
SLC52A2	470.792	0.630241	0.233149	2.70317	0.00686821	0.0477438
ADAM19	3.11526	3.84342	1.42225	2.70236	0.00688491	0.0477886
DUT-AS1	26.9944	1.14738	0.424594	2.70229	0.00688631	0.0477886
LARP1	1863.39	-0.671648	0.248531	-2.70247	0.00688268	0.0477886
NMT1	1037.84	-0.476909	0.176498	-2.70206	0.00689114	0.0477951
ERLEC1	824.804	-0.338279	0.125208	-2.70174	0.00689786	0.0478148
RPL30	4322.6	-0.361974	0.133991	-2.70149	0.00690301	0.0478236
CLTC	6434.18	-0.465164	0.172204	-2.70124	0.0069081	0.0478319
ACAP1	3947.9	-0.406948	0.15071	-2.70021	0.00692947	0.0479529
HTATIP2	235.631	-0.487698	0.180635	-2.69991	0.00693587	0.0479702
C2orf74	178.122	0.599505	0.222114	2.69909	0.00695292	0.0480611
HMGN2P5	54.2163	0.835884	0.309732	2.69873	0.00696049	0.048073
STK38	632.93	0.509501	0.1888	2.69863	0.00696249	0.048073
TJAP1	213.974	0.722949	0.267913	2.69845	0.00696636	0.048073
NADK2	539.058	-0.449094	0.166463	-2.69786	0.00697865	0.0480779
PDK1	804.768	-0.730617	0.270815	-2.69784	0.006979	0.0480779
SARS1	1897.67	-0.572117	0.212072	-2.69775	0.00698095	0.0480779
STC1	116.814	1.36178	0.504799	2.69767	0.0069827	0.0480779
PXK	863.583	-0.413833	0.15351	-2.69581	0.00702184	0.0483203
DCAF1	508.386	-0.522487	0.19388	-2.6949	0.007041	0.0484251
LINC00641	50.1872	-0.965395	0.358302	-2.69436	0.00705241	0.0484627
ZNF408	137.029	0.668347	0.248063	2.69427	0.00705434	0.0484627
CORO2A	93.5966	0.864898	0.321068	2.69382	0.00706393	0.0485015
IQCN	2.52597	4.54537	1.6876	2.69338	0.00707308	0.0485372
COPS8-DT	9.96778	-1.88038	0.698196	-2.69319	0.00707715	0.048538
RPL3	9283.19	-0.708936	0.26337	-2.69179	0.00710693	0.0487151
EEF1AKMT4	208.999	-0.888919	0.330541	-2.68928	0.00716062	0.048974
HGS	1091.86	0.579159	0.215336	2.68956	0.00715463	0.048974
RPL36AL	799.413	-0.530886	0.197373	-2.68977	0.0071502	0.048974
SNORD17	289.683	1.15189	0.428305	2.68942	0.0071577	0.048974
ATP5IF1	884.007	0.501033	0.186425	2.68759	0.00719702	0.0490866
FLOT1	1092.68	-0.579545	0.215625	-2.68774	0.00719376	0.0490866
NUDT17	37.6786	-0.973696	0.362247	-2.68793	0.00718963	0.0490866
NUP88	1304.7	-0.533751	0.198576	-2.6879	0.0071904	0.0490866
ZNF793	100.666	0.732287	0.272461	2.68767	0.00719517	0.0490866
ECPAS	2201.68	-0.41057	0.152828	-2.68649	0.00722079	0.0492214
TMEM184B	185.389	0.431109	0.160502	2.686	0.00723133	0.0492659
STK19	92.5648	0.664162	0.247323	2.68541	0.00724415	0.0493259
MFN1	759.586	-0.411574	0.153275	-2.68519	0.00724884	0.0493306
BRCC3	411.353	0.353387	0.131618	2.68495	0.00725417	0.0493396
PCID2	905.682	-0.467924	0.174295	-2.68468	0.00726001	0.049352
ZNF48	340.745	0.394646	0.147028	2.68416	0.0072713	0.0494015
CA11	53.6984	-0.73058	0.272241	-2.68358	0.00728382	0.0494319
ENPEP	20.4563	1.2899	0.480655	2.68363	0.00728275	0.0494319
VPS54	808.688	-0.36739	0.136958	-2.6825	0.00730737	0.0495645
ST8SIA4	526.101	-0.553586	0.20644	-2.68159	0.00732735	0.0496726
ARRDC1	345.596	0.356426	0.132935	2.68121	0.00733566	0.0497015
NECTIN2	227.93	0.602219	0.224739	2.67964	0.00737018	0.049908

## Sheet: Table S7
Supplementary Table 7. Differentially regulated genes in KAI-3 cell line following BCV treatment
Gene	baseMean	log2FoldChange	lfcSE	stat	pvalue	padj
RGS16	618.261	2.68106	0.18437	14.5418	6.58701e-48	8.15208e-44
LINC01588	402.467	1.82767	0.144118	12.6817	7.46648e-37	4.62026e-33
DDR1	133.83	5.07487	0.402254	12.6161	1.72144e-36	7.10151e-33
HLF	120.109	4.01985	0.3209	12.5268	5.32695e-36	1.64816e-32
FHL2	299.349	2.30285	0.18628	12.3623	4.17851e-35	1.03427e-31
C3	809.899	2.01355	0.177808	11.3243	9.94741e-30	2.05182e-26
CYP1A1	497.824	2.24003	0.200613	11.1659	5.98932e-29	1.05891e-25
IP6K3	77.4765	4.4881	0.409781	10.9524	6.46821e-28	1.00063e-24
L3MBTL2-AS1	147.585	7.42775	0.695433	10.6808	1.2525e-26	1.72232e-23
TP53I3	1102.86	2.50298	0.238639	10.4886	9.74801e-26	1.20641e-22
AFDN	355.201	3.97467	0.381265	10.425	1.90722e-25	2.1458e-22
TRIM22	1560.18	1.94556	0.19412	10.0225	1.2143e-23	1.25235e-20
MYRF	86.2334	5.23546	0.527607	9.92303	3.30551e-23	3.14685e-20
CDKN1A	3994.06	1.70333	0.172256	9.88839	4.67492e-23	4.13263e-20
SESN2	381.904	1.4544	0.148354	9.80358	1.08666e-22	8.96568e-20
POLH	1038.3	1.01234	0.106175	9.53471	1.5031e-21	1.16265e-18
PLEKHG6	125.637	3.31141	0.351105	9.43139	4.04691e-21	2.94615e-18
ATF3	553.031	1.98134	0.213833	9.26583	1.93561e-20	1.33084e-17
ABCA12	338.232	3.39101	0.368256	9.20829	3.31359e-20	2.05045e-17
H1-4	2664.83	-1.86952	0.202977	-9.2105	3.24622e-20	2.05045e-17
CSPG4	65.8242	3.34857	0.365293	9.16681	4.87228e-20	2.87139e-17
ZFP90	623.681	1.24063	0.13637	9.09756	9.2386e-20	5.19713e-17
E2F7	403.183	2.25501	0.249803	9.02714	1.76209e-19	9.48157e-17
GPR68	476.651	1.95059	0.216706	9.00111	2.23449e-19	1.15225e-16
CES4A	168.571	2.00466	0.223571	8.96653	3.06011e-19	1.51488e-16
CMPK2	62.8782	2.66364	0.297531	8.95248	3.47598e-19	1.65457e-16
H2AC25	659.081	-2.61441	0.294298	-8.88357	6.47503e-19	2.96796e-16
H1-3	1062.76	-1.96328	0.223216	-8.79541	1.42523e-18	6.29952e-16
ERO1B	285.002	1.34339	0.153512	8.75101	2.1146e-18	9.02425e-16
ADAM8	1273.9	1.35035	0.154456	8.74265	2.27715e-18	9.39401e-16
RRM2B	2204.22	1.41261	0.161753	8.73317	2.47624e-18	9.88578e-16
TNFRSF10B	1820.01	0.951704	0.109709	8.67481	4.14235e-18	1.60205e-15
H1-2	2309.8	-1.58614	0.184603	-8.59213	8.53705e-18	3.20165e-15
PARP9	43.5661	4.03053	0.471788	8.54309	1.30679e-17	4.75672e-15
PABPC1L	210.638	2.1047	0.246772	8.5289	1.4775e-17	5.22445e-15
TNFSF4	2984.55	2.1601	0.254441	8.4896	2.07356e-17	7.12843e-15
BTG2	883.632	1.82529	0.21518	8.48264	2.20143e-17	7.3635e-15
CCPG1	498.756	1.46579	0.172931	8.47615	2.32762e-17	7.5807e-15
DDIT3	367.642	1.62125	0.192112	8.43905	3.19921e-17	9.96999e-15
H4C8	602.758	-1.90944	0.226285	-8.43821	3.22236e-17	9.96999e-15
PPP3CB	414.886	-1.32045	0.157126	-8.40378	4.32321e-17	1.30498e-14
PLK1	218.08	-1.55449	0.188471	-8.2479	1.61196e-16	4.7499e-14
H2BC26	2308.6	-2.71048	0.328928	-8.24033	1.71737e-16	4.87889e-14
H4C4	1771.4	-2.09584	0.25454	-8.23382	1.81342e-16	4.87889e-14
LACC1	105.809	2.31929	0.281512	8.23868	1.74115e-16	4.87889e-14
ZNF561-AS1	126.675	1.85728	0.225503	8.23615	1.77848e-16	4.87889e-14
PYHIN1	363.84	1.88653	0.230682	8.17804	2.88497e-16	7.59667e-14
BLNK	140.87	2.79366	0.343899	8.12348	4.53011e-16	1.16801e-13
SLC12A4	360.3	1.49571	0.184279	8.11656	4.79567e-16	1.21125e-13
IRF1	668.252	1.17558	0.147231	7.98456	1.41023e-15	3.4906e-13
SERPINE1	88.0176	7.01256	0.878932	7.9785	1.48125e-15	3.59451e-13
ABHD5	513.312	1.26457	0.158697	7.96846	1.60661e-15	3.82372e-13
KLHDC7B	44.6217	2.53906	0.318838	7.96349	1.6726e-15	3.86096e-13
TRIM3	140.233	1.62198	0.2037	7.9626	1.68465e-15	3.86096e-13
WIPI1	163.291	1.4113	0.177909	7.9327	2.14439e-15	4.82527e-13
UNC13A	43.426	5.15053	0.64948	7.93023	2.18734e-15	4.83402e-13
LINC02051	184.265	1.66679	0.210416	7.92141	2.34823e-15	5.09854e-13
CHST6	34.7608	4.04132	0.514778	7.85061	4.14014e-15	8.8342e-13
CENPF	3730.46	-0.983033	0.125726	-7.81882	5.33192e-15	1.11844e-12
HMGB1P6	216.065	-1.49113	0.191629	-7.78133	7.17667e-15	1.48031e-12
CYP4F3	57.6694	5.79223	0.744635	7.77861	7.33233e-15	1.48762e-12
STOX2	78.1229	3.84556	0.49525	7.76488	8.1722e-15	1.63128e-12
SESN1	357.452	1.50442	0.193972	7.75584	8.77598e-15	1.72399e-12
RSAD2	105.933	3.12295	0.403585	7.73804	1.00964e-14	1.9524e-12
ADCY1	1604.61	1.16816	0.151172	7.72737	1.09795e-14	2.09049e-12
DTX3L	81.6883	3.17545	0.412268	7.70239	1.33543e-14	2.50413e-12
CHI3L2	47.2341	2.55382	0.331983	7.69263	1.44139e-14	2.66248e-12
CEACAM1	72.2055	6.36654	0.828445	7.68493	1.53078e-14	2.78602e-12
SRC	33.3449	4.09502	0.533708	7.67277	1.68324e-14	3.01909e-12
E2F2	467.027	1.1598	0.151688	7.64597	2.07375e-14	3.6664e-12
UPB1	43.2078	2.84996	0.373863	7.62302	2.47813e-14	4.31962e-12
ERN1	504.442	1.82428	0.239589	7.61418	2.65361e-14	4.4669e-12
KIAA1671	339.913	1.62902	0.213969	7.61335	2.6709e-14	4.4669e-12
SERPINA1	66.9469	4.56001	0.598756	7.61581	2.62037e-14	4.4669e-12
PIF1	79.9128	-1.67069	0.22044	-7.5789	3.48492e-14	5.75059e-12
CEBPB	199.064	2.02707	0.267862	7.56757	3.80261e-14	6.19225e-12
USP18	89.8967	2.05612	0.272694	7.54003	4.69871e-14	7.5521e-12
ARHGEF12	54.4782	2.15192	0.28611	7.52129	5.42367e-14	8.49662e-12
H2BC15	492.122	-1.61932	0.215277	-7.52201	5.39407e-14	8.49662e-12
SLC3A2	577.137	1.17695	0.156556	7.51776	5.57231e-14	8.62036e-12
H2BC5	1207.6	-1.6719	0.224719	-7.43993	1.00737e-13	1.53916e-11
GPR132	850.896	1.24946	0.168312	7.42347	1.14091e-13	1.72194e-11
SERPINB10	75.1895	3.1734	0.428707	7.40225	1.33895e-13	1.99649e-11
ATP8B4	2508.62	0.799831	0.108786	7.35235	1.94756e-13	2.8694e-11
CHAC1	83.8779	2.6648	0.36266	7.34793	2.01299e-13	2.93092e-11
FRMD4B	361.251	1.41592	0.19289	7.34056	2.12709e-13	3.06104e-11
BUB1	1123.4	-1.20874	0.164938	-7.32843	2.32856e-13	3.31245e-11
GPR87	52.1866	4.40821	0.603243	7.30752	2.72114e-13	3.82691e-11
LCN15	47.7482	5.53531	0.760461	7.27889	3.3659e-13	4.68049e-11
IER3	464.002	1.67892	0.231348	7.25709	3.95508e-13	5.3889e-11
TNFSF10	2040.85	1.4459	0.199247	7.25684	3.96242e-13	5.3889e-11
H4C5	876.482	-1.32159	0.183295	-7.2102	5.58692e-13	7.51562e-11
CENPE	775.953	-0.924326	0.12861	-7.18707	6.61976e-13	8.74594e-11
H2BC17	1320.36	-2.13827	0.297537	-7.18659	6.64285e-13	8.74594e-11
PFKFB3	368.022	1.50358	0.209396	7.18052	6.94444e-13	9.04678e-11
C4B	34.6873	4.20592	0.586408	7.17234	7.37287e-13	9.50486e-11
ADRB2	156.619	2.1741	0.303266	7.16896	7.55672e-13	9.64144e-11
MYBL1	604.738	1.39644	0.195067	7.15878	8.13995e-13	1.02796e-10
PIK3R6	174.063	1.09514	0.153401	7.13906	9.39706e-13	1.17015e-10
TCERG1	720.366	-0.92546	0.129649	-7.13822	9.45502e-13	1.17015e-10
HGSNAT	374.818	1.21446	0.17035	7.12924	1.00926e-12	1.2367e-10
STOM	1095.21	1.1201	0.157278	7.12181	1.06522e-12	1.29247e-10
GPR84	79.0304	2.62833	0.369329	7.11651	1.10692e-12	1.33003e-10
NECTIN4	258.247	1.58621	0.223338	7.10227	1.22721e-12	1.46038e-10
XPC	1157.33	1.08973	0.15375	7.08771	1.36352e-12	1.60714e-10
EDA2R	250.388	1.77688	0.251417	7.06749	1.57766e-12	1.842e-10
NCEH1	960.29	1.29327	0.183466	7.0491	1.80076e-12	2.08282e-10
H2BC12	1440.56	-1.89816	0.269881	-7.03332	2.01669e-12	2.31098e-10
DUX4L50	38.9113	3.40079	0.484053	7.02565	2.13066e-12	2.401e-10
GADD45B	568.682	1.91779	0.272979	7.02543	2.13405e-12	2.401e-10
IKZF1	2504.43	-0.94614	0.134832	-7.01717	2.26406e-12	2.52433e-10
CEP170B	31.6439	5.18168	0.739011	7.01164	2.35537e-12	2.60269e-10
SBNO1	806.253	-0.876245	0.125087	-7.00506	2.46878e-12	2.70386e-10
PLXNB3	69.4068	2.71582	0.388526	6.99007	2.7474e-12	2.98262e-10
SFMBT2	133.962	1.72532	0.246907	6.98772	2.79385e-12	3.00667e-10
INSIG1	968.73	-1.49715	0.214793	-6.97021	3.16475e-12	3.37646e-10
NID1	234.367	1.5302	0.221601	6.90519	5.01347e-12	5.30314e-10
ROCK2	1159.92	-0.84958	0.123528	-6.87763	6.08565e-12	6.38271e-10
GADD45A	275.407	2.16394	0.314793	6.87418	6.2346e-12	6.48399e-10
GCH1	1232.61	1.25858	0.183203	6.86985	6.42706e-12	6.62844e-10
CLEC17A	80.6993	2.94252	0.428698	6.86385	6.70278e-12	6.83941e-10
H4C12	2776.92	-1.65122	0.240596	-6.86302	6.74214e-12	6.83941e-10
LIG3	583.049	-1.01184	0.147949	-6.83916	7.96571e-12	8.01493e-10
TNIP3	154.949	1.20478	0.176363	6.83124	8.4186e-12	8.4023e-10
MTHFD2	4411.72	0.868544	0.127234	6.82635	8.71029e-12	8.62389e-10
DHRS3	272.264	1.69462	0.248406	6.82199	8.97896e-12	8.74989e-10
IRAK2	178.52	2.18363	0.320062	6.82253	8.94487e-12	8.74989e-10
LPXN	1684.6	1.16795	0.171472	6.81129	9.67265e-12	9.35224e-10
VANGL2	30.7543	3.84598	0.565439	6.80175	1.03353e-11	9.9155e-10
H4C13	1084.05	-1.92253	0.282943	-6.79477	1.08482e-11	1.03275e-09
H2AC8	869.403	-1.84593	0.272171	-6.78224	1.18325e-11	1.11786e-09
CSF1	151.409	2.04346	0.301608	6.77522	1.24219e-11	1.16465e-09
PARP14	1105.94	1.48015	0.218778	6.76551	1.32837e-11	1.23608e-09
FAS	1809.63	1.34145	0.198382	6.76196	1.36137e-11	1.25733e-09
SERTAD1	155.355	1.76132	0.260883	6.75136	1.46462e-11	1.34267e-09
STRADA	356.3	0.93147	0.138015	6.74905	1.48817e-11	1.35423e-09
H2BC13	702.319	-2.32644	0.34523	-6.7388	1.59702e-11	1.44268e-09
SAT1	366.909	1.53642	0.228269	6.73074	1.688e-11	1.51381e-09
GBP5	836.973	1.56238	0.232397	6.72289	1.78156e-11	1.57637e-09
RGS1	787.874	1.48946	0.221555	6.72275	1.78322e-11	1.57637e-09
TAX1BP3	164.031	1.02705	0.152886	6.71773	1.84578e-11	1.6201e-09
ITGA1	207.425	1.90819	0.285151	6.69187	2.20338e-11	1.92035e-09
CCL3	83.4541	3.75152	0.560713	6.69063	2.2221e-11	1.92313e-09
SORL1	370.894	1.68516	0.252386	6.67692	2.44013e-11	2.09715e-09
H2BC9	999.51	-1.69556	0.254654	-6.65828	2.77045e-11	2.36463e-09
H4C2	663.97	-1.44103	0.217156	-6.63594	3.22444e-11	2.73327e-09
PTPDC1	188.143	1.09	0.164607	6.62185	3.54728e-11	2.98647e-09
IL5	277.8	2.38414	0.361336	6.59812	4.16401e-11	3.48202e-09
UBE2G1	622.506	-1.03056	0.156713	-6.57607	4.83057e-11	4.01229e-09
IFNG	152.792	2.65933	0.404856	6.56858	5.07984e-11	4.1912e-09
EGR2	46.0427	3.11562	0.474652	6.56401	5.23783e-11	4.29294e-09
PRKG2	43.5266	2.33989	0.35676	6.55873	5.42676e-11	4.39971e-09
RAB30	201.605	1.72895	0.263628	6.55828	5.44307e-11	4.39971e-09
SOS2	814.809	1.05507	0.160896	6.55742	5.47475e-11	4.39971e-09
DQX1	45.2663	6.04036	0.921364	6.55589	5.53114e-11	4.41635e-09
CCNE2	571.617	1.61576	0.247041	6.54047	6.13245e-11	4.86508e-09
H2BC10	969.91	-1.74732	0.267689	-6.52743	6.69071e-11	5.27286e-09
MGAT3	99.5923	2.09106	0.320394	6.52652	6.73167e-11	5.27286e-09
LDB1	558.467	1.01289	0.155657	6.5072	7.65647e-11	5.95953e-09
CCL5	1038.81	0.940703	0.14519	6.4791	9.2271e-11	7.13716e-09
RNF19B	775.397	1.46206	0.225753	6.47635	9.39694e-11	7.22338e-09
H2AC12	884.018	-1.84528	0.285352	-6.46667	1.00188e-10	7.65386e-09
PLAC8	50.2507	2.41422	0.373672	6.46081	1.04144e-10	7.90728e-09
ARHGAP19	576.398	-0.879592	0.136205	-6.45786	1.06195e-10	8.01382e-09
LINC01010	23.6421	3.35417	0.520569	6.44328	1.16922e-10	8.76985e-09
CSNK1G1	900.55	0.825356	0.128208	6.43764	1.21347e-10	9.04692e-09
H2BC27P	139.078	-1.93323	0.300568	-6.43192	1.26003e-10	9.31856e-09
PPP1R15A	569.11	2.11851	0.329406	6.43133	1.26496e-10	9.31856e-09
EBI3	186.88	1.44584	0.226053	6.39601	1.59494e-10	1.16799e-08
CASP1	51.9684	2.11948	0.332854	6.36761	1.92003e-10	1.39778e-08
MR1	1388.22	1.27745	0.200677	6.3657	1.94405e-10	1.40699e-08
IL16	139.869	2.30132	0.36172	6.36217	1.98923e-10	1.43132e-08
PRR5L	31.089	3.94458	0.620661	6.35545	2.07815e-10	1.48666e-08
FGR	202.747	1.98484	0.312418	6.35314	2.10966e-10	1.50053e-08
MIR23AHG	357.623	1.3807	0.217933	6.33546	2.3664e-10	1.67352e-08
CKS2	347.323	-1.08966	0.172183	-6.32849	2.47566e-10	1.74084e-08
H2AC15	270.528	-2.15494	0.340796	-6.32326	2.56097e-10	1.79066e-08
H2BC4	1358.32	-1.95792	0.309732	-6.32133	2.59326e-10	1.80305e-08
CD82	109.559	1.87098	0.296051	6.31978	2.61932e-10	1.81099e-08
PLK3	132.567	1.62501	0.257247	6.3169	2.66864e-10	1.83484e-08
CD80	357.166	1.48811	0.235936	6.30726	2.84025e-10	1.94204e-08
HROB	219.87	1.02628	0.163056	6.29402	3.09343e-10	2.10353e-08
KCTD11	120.512	1.58445	0.252349	6.2788	3.41192e-10	2.29793e-08
KLF10	244.379	1.62533	0.258868	6.2786	3.41644e-10	2.29793e-08
FRMPD2	34.1754	3.98338	0.634781	6.2752	3.49179e-10	2.33591e-08
SLC1A5	1775.85	0.961945	0.153314	6.27435	3.51106e-10	2.33618e-08
ATF5	73.9257	1.8387	0.293181	6.27154	3.57499e-10	2.36599e-08
PASK	1083.32	0.988545	0.157835	6.26314	3.77312e-10	2.48384e-08
ABTB2	37.0673	3.67236	0.587043	6.2557	3.95745e-10	2.5914e-08
ACAD11	222.195	1.2226	0.195625	6.2497	4.11237e-10	2.66464e-08
SH3PXD2B	25.5821	8.04308	1.28692	6.24985	4.10847e-10	2.66464e-08
MICALL2	78.3728	2.14753	0.343948	6.24376	4.27165e-10	2.75343e-08
GTF2E2	361.15	-0.801559	0.128491	-6.23827	4.42443e-10	2.82252e-08
TXNIP	3111.63	1.76451	0.282844	6.23848	4.41854e-10	2.82252e-08
CHD9NB	46.0174	2.49334	0.400006	6.23324	4.56875e-10	2.88671e-08
SCN2A	119.621	4.37327	0.701616	6.23314	4.57172e-10	2.88671e-08
CYTH1	1003.91	1.02606	0.164658	6.23143	4.62197e-10	2.89272e-08
DENND2B	27.6342	4.66412	0.748507	6.23123	4.62798e-10	2.89272e-08
OSBPL3	728.238	0.912341	0.146672	6.2203	4.96215e-10	3.07239e-08
SOCS3	738.33	1.02646	0.165021	6.2202	4.96507e-10	3.07239e-08
CCM2	558.706	0.693578	0.111596	6.2151	5.12908e-10	3.15808e-08
NINJ1	332.258	1.64813	0.265271	6.21302	5.19773e-10	3.18451e-08
LAMB3	34.2926	2.58898	0.417306	6.20405	5.50296e-10	3.35491e-08
LINC01882	150.831	1.66502	0.269003	6.1896	6.03178e-10	3.65928e-08
UBASH3B	88.1076	1.6906	0.273837	6.17376	6.66838e-10	4.02575e-08
H4C11	1461.67	-1.09719	0.178281	-6.15431	7.54058e-10	4.5302e-08
IRF4	9303.59	-0.999854	0.162787	-6.14211	8.14345e-10	4.84535e-08
MDM2	14782.5	1.18878	0.193538	6.14233	8.13171e-10	4.84535e-08
ASPM	2459.7	-0.994711	0.162331	-6.12768	8.91711e-10	5.28029e-08
H3C3	1105.16	-1.17808	0.192324	-6.1255	9.03998e-10	5.32756e-08
EPPK1	28.6153	5.37859	0.878196	6.12459	9.09154e-10	5.33256e-08
AXL	32.1077	4.51152	0.738164	6.11181	9.85053e-10	5.75048e-08
SUSD6	687.691	1.42035	0.232539	6.108	1.00889e-09	5.86197e-08
UBD	78.1235	2.61841	0.429065	6.10259	1.04361e-09	6.03538e-08
OAS3	132.213	1.69718	0.279113	6.0806	1.19732e-09	6.89208e-08
SMAD5	390.407	1.1316	0.186508	6.06729	1.30089e-09	7.4536e-08
MT-ND3	139.004	2.17285	0.358671	6.05806	1.37776e-09	7.85767e-08
H2AC18	5421.4	-1.62813	0.268985	-6.05286	1.423e-09	8.07845e-08
CPEB4	525.915	1.78405	0.295459	6.03824	1.55808e-09	8.80494e-08
H4C3	1998.07	-1.48609	0.246523	-6.0282	1.65792e-09	9.32655e-08
ICAM1	1086.09	1.54025	0.255736	6.02281	1.71417e-09	9.59936e-08
ST3GAL1	803.522	-0.838851	0.139498	-6.01335	1.81725e-09	1.01308e-07
MAP3K12	254.394	1.02293	0.170195	6.01033	1.85143e-09	1.0275e-07
ALDH18A1	898.075	-1.03659	0.172563	-6.007	1.88993e-09	1.03954e-07
H2AC14	1503.33	-1.89473	0.315401	-6.00735	1.88579e-09	1.03954e-07
LPAR6	150.89	1.53236	0.255401	5.99981	1.97552e-09	1.08181e-07
HELZ2	142.585	1.57811	0.263193	5.99601	2.02221e-09	1.10251e-07
SNORD3D	332.234	-1.26716	0.211406	-5.99395	2.04807e-09	1.11171e-07
STARD4	1098.61	0.874732	0.146141	5.98551	2.1571e-09	1.16578e-07
RNF144A	1919.27	0.658178	0.110072	5.97953	2.23784e-09	1.20415e-07
KAT2B	473.92	1.29552	0.216941	5.97179	2.34668e-09	1.25725e-07
SGK1	366.02	1.52906	0.256105	5.97045	2.36601e-09	1.26214e-07
H3C4	891.465	-1.68235	0.2823	-5.95945	2.53096e-09	1.34434e-07
PLXNA3	158.243	1.49802	0.25151	5.95611	2.58314e-09	1.36619e-07
MAPK11	63.6147	1.54524	0.25976	5.94872	2.70244e-09	1.42321e-07
MAF	229.063	2.38121	0.400405	5.94699	2.73121e-09	1.43226e-07
TAF1D	660.749	-0.778884	0.131034	-5.94413	2.77937e-09	1.44527e-07
TRAM2	270.553	1.30241	0.219088	5.94468	2.77006e-09	1.44527e-07
TLR3	54.2159	2.07712	0.35029	5.92972	3.03446e-09	1.57132e-07
GAB2	111.538	2.36397	0.399237	5.92122	3.19557e-09	1.64785e-07
CBR3	123.811	1.3714	0.232019	5.91074	3.40567e-09	1.7489e-07
FCRLA	21.6138	5.00567	0.8486	5.89874	3.66282e-09	1.87318e-07
AMZ2P1	125.478	1.3306	0.225751	5.89411	3.76699e-09	1.91853e-07
TNFSF15	90.1197	1.97124	0.334738	5.88889	3.88787e-09	1.97198e-07
GDPD5	63.5263	1.73085	0.294467	5.87793	4.15431e-09	2.09852e-07
MAST4	185.118	1.81425	0.309185	5.86785	4.41479e-09	2.22103e-07
FN1	1626.7	0.801138	0.136578	5.8658	4.46973e-09	2.23957e-07
RINL	631.554	0.822006	0.140588	5.84691	5.00783e-09	2.49907e-07
INTS10	703.301	-0.861436	0.147975	-5.82148	5.83271e-09	2.88743e-07
TOP2B	1986.37	-0.829806	0.142534	-5.82182	5.82101e-09	2.88743e-07
CUL9	1295.99	1.43353	0.246627	5.81257	6.15217e-09	3.03344e-07
STARD5	69.9167	1.83802	0.316328	5.81048	6.22927e-09	3.05927e-07
PDHB	403.341	-0.994599	0.17126	-5.80754	6.33964e-09	3.10116e-07
CDH1	172.481	1.39569	0.240924	5.79307	6.91105e-09	3.3655e-07
ZNF215	103.505	1.8898	0.326249	5.79251	6.93441e-09	3.3655e-07
ICOSLG	37.8324	1.90054	0.328201	5.7908	7.00539e-09	3.38667e-07
TOB1	263.933	1.20952	0.208999	5.78722	7.15607e-09	3.44605e-07
MTO1	560.69	0.589307	0.101868	5.78502	7.25048e-09	3.47798e-07
NEURL1B	25.4915	8.05641	1.39377	5.78029	7.4571e-09	3.56329e-07
ODR4	272.325	0.778224	0.134695	5.77767	7.57429e-09	3.60536e-07
TAF1B	217.714	-0.911555	0.157942	-5.77147	7.85824e-09	3.72619e-07
CFLAR	1489.47	1.09249	0.189446	5.7668	8.07927e-09	3.81638e-07
RHOB	1188.2	1.34208	0.232755	5.76606	8.11473e-09	3.81855e-07
DENND3-AS1	41.6478	1.80601	0.313356	5.76343	8.242e-09	3.86375e-07
IRF7	143.097	1.70945	0.296869	5.75825	8.4988e-09	3.9691e-07
H2AC16	779.334	-1.62752	0.282856	-5.75388	8.72185e-09	4.04276e-07
PIDD1	304.406	1.06037	0.184287	5.7539	8.72052e-09	4.04276e-07
PTK7	18.6638	4.10534	0.714418	5.7464	9.11616e-09	4.20976e-07
F11R	290.585	1.40076	0.244301	5.73374	9.82416e-09	4.51984e-07
H2AC11	1968.63	-1.46968	0.256829	-5.72239	1.05034e-08	4.80659e-07
H2AC13	1428.78	-1.73936	0.303976	-5.72204	1.05251e-08	4.80659e-07
PSRC1	69.3046	-1.4445	0.252853	-5.71279	1.11138e-08	5.05678e-07
MTREX	704.671	-0.804511	0.140908	-5.70949	1.13317e-08	5.13704e-07
CSF2	89.5091	2.33259	0.408854	5.70519	1.1621e-08	5.24897e-07
CHRM3-AS2	33.9974	2.68868	0.471419	5.70337	1.17462e-08	5.28623e-07
ANXA8	43.2134	3.72977	0.654138	5.70182	1.18537e-08	5.31527e-07
KIF20A	676.726	-1.20486	0.211387	-5.69981	1.19944e-08	5.35892e-07
CDKN2AIP	292.842	0.809301	0.142155	5.69311	1.24749e-08	5.55358e-07
RYR2	64.1714	1.41516	0.248636	5.69169	1.25791e-08	5.57989e-07
ABHD4	133.646	1.88212	0.331527	5.67714	1.36969e-08	6.05403e-07
MAP2K3	223.568	1.18987	0.209823	5.67081	1.42121e-08	6.25941e-07
SPTBN1	1565.14	-1.18128	0.208391	-5.66859	1.43981e-08	6.31882e-07
HNRNPH2	431.805	-0.648833	0.114498	-5.66675	1.45531e-08	6.36428e-07
FBF1	378.575	1.20406	0.212521	5.6656	1.46511e-08	6.38456e-07
CDV3	2181.05	-0.695549	0.122919	-5.6586	1.5261e-08	6.627e-07
ARVCF	113.523	2.23144	0.394565	5.65543	1.55452e-08	6.65701e-07
FNTB	164.509	1.04855	0.185394	5.6558	1.5512e-08	6.65701e-07
HLA-DMB	466.346	-0.776655	0.137305	-5.6564	1.54581e-08	6.65701e-07
SH2B3	245.696	1.31458	0.232434	5.65572	1.5519e-08	6.65701e-07
VDR	208.902	1.60304	0.283641	5.65166	1.58902e-08	6.78127e-07
CD44	1539.6	1.25776	0.222578	5.65085	1.59652e-08	6.78986e-07
TYK2	2549.38	0.922294	0.163337	5.64656	1.63687e-08	6.93763e-07
DUSP5	146.225	2.07279	0.367185	5.64507	1.65114e-08	6.95051e-07
GALNT5	4381.93	-1.01272	0.179385	-5.64548	1.64719e-08	6.95051e-07
RAB11FIP1	1496.24	1.193	0.211413	5.64297	1.67137e-08	7.01182e-07
ZNF79	213.691	1.39687	0.247853	5.63587	1.74174e-08	7.28237e-07
TANK	1356.46	0.990837	0.176127	5.62569	1.84765e-08	7.69917e-07
DCAF7	1532.89	-0.647302	0.115091	-5.62425	1.86319e-08	7.73788e-07
RHOC	768.549	1.03412	0.184034	5.61914	1.91908e-08	7.92367e-07
UBE2N	625.76	-0.903731	0.160835	-5.61899	1.92073e-08	7.92367e-07
H2BC6	985.769	-1.87191	0.333194	-5.61808	1.93094e-08	7.93932e-07
IER5	1483.44	0.987318	0.176108	5.60633	2.06659e-08	8.46892e-07
SMARCC1	1043.65	-0.673185	0.120185	-5.60125	2.12811e-08	8.69222e-07
RAB33B	263.807	1.01096	0.180571	5.59867	2.15996e-08	8.79332e-07
HMGCR	532.557	-0.73535	0.13153	-5.59075	2.26095e-08	9.17427e-07
CD52	52.9443	2.69644	0.482475	5.58876	2.28702e-08	9.24973e-07
POU3F2	190.467	-1.31041	0.234772	-5.58164	2.38264e-08	9.60509e-07
CARM1	309.989	-0.80053	0.143477	-5.57952	2.41189e-08	9.69141e-07
GPR55	189.423	1.35717	0.243378	5.57639	2.45561e-08	9.83515e-07
NCL	1631.89	-1.21714	0.218421	-5.57244	2.51202e-08	1.00286e-06
DLGAP5	837.119	-1.02611	0.18443	-5.56368	2.64143e-08	1.05114e-06
LGR4	120.334	-1.49503	0.269225	-5.55309	2.80658e-08	1.11328e-06
ANXA9	26.6142	2.37509	0.427928	5.5502	2.85336e-08	1.12462e-06
MFGE8	161.121	1.47854	0.266373	5.55062	2.84663e-08	1.12462e-06
SLC7A5P2	49.251	1.86875	0.336902	5.54686	2.90838e-08	1.14267e-06
LBH	30.051	2.40335	0.434253	5.53446	3.12195e-08	1.2227e-06
PHLDA1	776.099	1.01939	0.184228	5.53332	3.14223e-08	1.22676e-06
RALGDS	982.162	1.06125	0.191989	5.52767	3.24518e-08	1.26297e-06
H3C15	5399.03	-1.45751	0.264351	-5.51356	3.51649e-08	1.36427e-06
SULF2	27.9274	7.22171	1.31097	5.50867	3.61562e-08	1.39834e-06
LRP1	117.757	2.1751	0.395429	5.5006	3.78491e-08	1.45925e-06
GOLGA8B	869.378	1.27016	0.231091	5.49637	3.8769e-08	1.49008e-06
SYTL2	267.71	1.81947	0.331774	5.48407	4.1565e-08	1.5926e-06
C9orf40	539.783	-0.887459	0.161966	-5.47929	4.27045e-08	1.62619e-06
PLIN4	24.394	7.02392	1.28188	5.47937	4.2684e-08	1.62619e-06
EPSTI1	125.327	2.00744	0.36664	5.47524	4.36914e-08	1.64977e-06
GDF15	19.1553	3.38192	0.617663	5.47535	4.36647e-08	1.64977e-06
RTL9	37.0463	2.4869	0.454219	5.47511	4.37238e-08	1.64977e-06
KCNN4	181.306	1.31362	0.240112	5.47087	4.47842e-08	1.68465e-06
SCARNA7	1135.05	0.861822	0.157701	5.4649	4.63173e-08	1.73704e-06
TIGAR	306.552	1.64627	0.301558	5.4592	4.78275e-08	1.78826e-06
H4C6	1452.63	-1.29172	0.236822	-5.4544	4.91375e-08	1.8317e-06
PTK2B	284.733	1.22866	0.225319	5.45297	4.95346e-08	1.84096e-06
PPCDC	290.663	0.837339	0.153795	5.44451	5.19468e-08	1.92483e-06
TNC	516.153	0.835924	0.153572	5.44322	5.23273e-08	1.93314e-06
LINC02086	188.728	1.33123	0.244643	5.44154	5.28221e-08	1.94562e-06
H2AC17	1487.09	-1.50123	0.276105	-5.43715	5.41402e-08	1.98825e-06
KCNA2	21.1231	3.14782	0.579084	5.43586	5.45325e-08	1.99673e-06
STPG1	44.8962	1.59129	0.292883	5.4332	5.53509e-08	2.02072e-06
TRAF4	949.466	1.09703	0.201958	5.43196	5.57375e-08	2.02885e-06
TRIM35	476.53	1.09945	0.202787	5.42168	5.90414e-08	2.1428e-06
TUFT1	80.8255	1.25079	0.231072	5.41297	6.19865e-08	2.24311e-06
SMAD7	94.1825	1.06819	0.197417	5.41085	6.27275e-08	2.26331e-06
H2AC6	818.503	-1.23267	0.228116	-5.40369	6.52839e-08	2.3487e-06
KRT7	139.338	1.03539	0.191738	5.40001	6.66387e-08	2.39049e-06
HMGB1	2600.82	-1.22873	0.227579	-5.39916	6.69541e-08	2.39484e-06
PORCN	121.372	1.0146	0.187937	5.39864	6.71467e-08	2.39484e-06
MRC2	17.7101	5.09662	0.944675	5.3951	6.84856e-08	2.43252e-06
TMEM63B	216.645	0.987595	0.183064	5.39481	6.85965e-08	2.43252e-06
ULBP2	41.9004	1.65032	0.306308	5.38779	7.13301e-08	2.52223e-06
FGD2	85.8375	1.30902	0.243517	5.37545	7.63919e-08	2.69352e-06
GINS4	696.199	0.803649	0.149619	5.37129	7.81754e-08	2.74858e-06
SQSTM1	2627.7	1.28311	0.238994	5.36878	7.92728e-08	2.77926e-06
H4C1	458.858	-1.6583	0.309067	-5.36549	8.07281e-08	2.82229e-06
ECE1	377.027	0.78603	0.146716	5.35751	8.43755e-08	2.9415e-06
CAPRIN1	1888.04	-0.529302	0.0989056	-5.35159	8.71861e-08	3.03094e-06
FAM241A	308.731	1.05215	0.196684	5.34947	8.82115e-08	3.05706e-06
SCAP	480.241	-0.569699	0.106505	-5.34902	8.84314e-08	3.05706e-06
HMG20B	238.789	-0.923592	0.172982	-5.33924	9.33367e-08	3.21765e-06
H3C13	2031.14	-1.65574	0.310269	-5.33647	9.47714e-08	3.25267e-06
KAT5	142.959	-0.933116	0.174863	-5.33627	9.48782e-08	3.25267e-06
BHLHE40	1721.26	0.811757	0.152147	5.33535	9.53608e-08	3.26018e-06
CCDC90B	441.944	0.789677	0.148036	5.33435	9.58882e-08	3.26918e-06
TLCD1	39.337	1.94659	0.364965	5.33363	9.62707e-08	3.2732e-06
ASXL1	920.983	-0.696276	0.130671	-5.32846	9.90512e-08	3.35851e-06
BMP1	86.6531	1.35911	0.255403	5.32143	1.02956e-07	3.47188e-06
IGFBP7	99.89	1.35385	0.254399	5.32176	1.02768e-07	3.47188e-06
RAD23B	885.744	-0.745491	0.140129	-5.32003	1.03749e-07	3.48913e-06
PMCH	69.7657	2.30417	0.43318	5.31921	1.04219e-07	3.49544e-06
CYB561A3	1285.16	0.613471	0.115351	5.3183	1.04743e-07	3.5035e-06
CYTH4	145.976	1.95838	0.369198	5.30442	1.13034e-07	3.77063e-06
SNRPF	154.381	-1.07753	0.203215	-5.30243	1.14271e-07	3.80166e-06
PDE4B	170.159	1.19991	0.226503	5.29753	1.17379e-07	3.8946e-06
H4C9	683.855	-1.46637	0.277089	-5.29204	1.20956e-07	4.00255e-06
CCDC50	4398.41	-0.645215	0.121976	-5.28968	1.22533e-07	4.04391e-06
LAIR1	79.0751	2.19018	0.414971	5.27791	1.30668e-07	4.30092e-06
RCBTB2	727.588	1.46032	0.277404	5.26423	1.40776e-07	4.62133e-06
VAPA	1253.63	-0.546168	0.103856	-5.25892	1.44903e-07	4.74424e-06
HNRNPD	373.678	-0.705111	0.134169	-5.25541	1.47699e-07	4.823e-06
GBP4	148.99	1.41852	0.269998	5.25381	1.48982e-07	4.85212e-06
ILF3	1644.41	-0.80235	0.152809	-5.25066	1.51555e-07	4.92296e-06
MMD	301.365	0.86999	0.165834	5.24614	1.55321e-07	5.03208e-06
CD226	322.819	1.4879	0.283647	5.2456	1.55775e-07	5.0336e-06
SF3B1	3576.37	-0.595474	0.113738	-5.23551	1.64532e-07	5.30274e-06
PALS2	633.298	-0.627228	0.119852	-5.23336	1.66455e-07	5.35076e-06
ZNF146	869.454	-0.61113	0.116892	-5.22817	1.71196e-07	5.48891e-06
CLUAP1	108.778	1.05042	0.201092	5.22359	1.75485e-07	5.59742e-06
FUNDC2	167.941	-1.227	0.234893	-5.22367	1.75411e-07	5.59742e-06
UBA1	1557.14	-0.629203	0.120499	-5.22166	1.77325e-07	5.64159e-06
TNFSF8	591.463	1.05815	0.202824	5.21706	1.81786e-07	5.76866e-06
CDCA7	1293.13	-0.802035	0.153761	-5.21613	1.82698e-07	5.7828e-06
RHOU	184.392	0.998101	0.19153	5.21119	1.87632e-07	5.9238e-06
PPM1D	851.647	1.28717	0.247204	5.2069	1.92016e-07	6.04681e-06
GZMB	39.4492	2.87992	0.553274	5.20524	1.93748e-07	6.08585e-06
TCF7	42.5012	3.14901	0.605289	5.2025	1.96626e-07	6.16061e-06
ITPKC	217.769	1.11375	0.214431	5.194	2.05823e-07	6.43249e-06
SNHG26	285.462	-0.849127	0.16358	-5.19091	2.09272e-07	6.52379e-06
MED30	114.088	-1.07384	0.206906	-5.18997	2.10329e-07	6.54028e-06
H3C2	2439.53	-1.38435	0.267162	-5.18168	2.19896e-07	6.82062e-06
BTG1	607.549	1.224	0.236244	5.18108	2.20605e-07	6.82552e-06
POLR3H	184.103	-1.07974	0.208451	-5.17983	2.22085e-07	6.85417e-06
NCAPD2	2081.34	-0.91758	0.177235	-5.17718	2.25261e-07	6.91771e-06
SMIM14	472.057	0.820059	0.158392	5.1774	2.24997e-07	6.91771e-06
FXYD2	16.0454	3.89487	0.752877	5.17332	2.29972e-07	7.01852e-06
SLC49A4	55.8736	1.7011	0.328835	5.1731	2.30246e-07	7.01852e-06
SMC4	2419.66	-0.551802	0.106652	-5.17384	2.29328e-07	7.01852e-06
SCRN1	28.2234	7.24079	1.40068	5.16947	2.34763e-07	7.13865e-06
EIF2B5	397.337	-0.801671	0.155213	-5.16498	2.40463e-07	7.29405e-06
H2BC8	838.643	-1.64967	0.319956	-5.15594	2.52355e-07	7.6063e-06
NCF2	582.091	1.02465	0.198713	5.15641	2.51734e-07	7.6063e-06
NKG7	473.118	0.895691	0.173726	5.15576	2.52601e-07	7.6063e-06
MT-RNR2	2.08018e+06	2.19209	0.425298	5.15425	2.54646e-07	7.64928e-06
ENC1	325.841	0.928804	0.180239	5.15319	2.56094e-07	7.6556e-06
TMSB4X	9931.95	-0.568626	0.110343	-5.15327	2.55986e-07	7.6556e-06
ANKRD36B	329.538	1.32073	0.256427	5.15052	2.59761e-07	7.73563e-06
TWSG1	185.367	1.06317	0.206426	5.15034	2.60021e-07	7.73563e-06
ANK1	19.8693	3.45824	0.671597	5.14928	2.61485e-07	7.76053e-06
AOAH	306.478	0.9308	0.18091	5.14511	2.67364e-07	7.91601e-06
KLF5	39.9798	1.52635	0.296819	5.14235	2.71327e-07	7.9951e-06
NTN1	109.112	1.16175	0.225917	5.14236	2.71305e-07	7.9951e-06
BTBD2	293.311	-1.06654	0.207566	-5.13831	2.77222e-07	8.14941e-06
NAMPT	1467.04	0.943394	0.183811	5.13242	2.86036e-07	8.38857e-06
EIF3A	2004.15	-0.702059	0.136811	-5.13161	2.87275e-07	8.405e-06
TTLL7	209.724	0.830153	0.161806	5.13053	2.88924e-07	8.4333e-06
DUSP14	362.217	1.10929	0.216355	5.12718	2.94108e-07	8.54432e-06
HMSD	94.2153	1.55338	0.302956	5.12742	2.93736e-07	8.54432e-06
IFIH1	186.602	1.11588	0.21769	5.12599	2.95978e-07	8.5785e-06
OPA1	1997.96	-0.713269	0.139291	-5.12073	3.04359e-07	8.8008e-06
MAN1C1	171.679	1.53301	0.299586	5.11708	3.10302e-07	8.95175e-06
MT-RNR1	546459	2.76231	0.540014	5.11527	3.13298e-07	8.9795e-06
MYB	745.313	-0.932591	0.182318	-5.11518	3.13441e-07	8.9795e-06
UCK2	482.364	-0.819355	0.160171	-5.1155	3.12917e-07	8.9795e-06
DNAI2	24.7588	3.26739	0.638964	5.11357	3.1612e-07	9.02114e-06
TTLL6	24.219	2.39107	0.467606	5.11344	3.16352e-07	9.02114e-06
TRMT112	534.984	-0.920601	0.180286	-5.10632	3.28486e-07	9.34562e-06
FDXACB1	72.1811	-1.36431	0.267351	-5.10305	3.34214e-07	9.48678e-06
SERPINB8	58.5566	1.59399	0.312484	5.10104	3.37794e-07	9.56644e-06
SCD	829.023	-1.3994	0.27446	-5.09874	3.41931e-07	9.66149e-06
H2AC7	928.097	-1.2476	0.244722	-5.09804	3.4318e-07	9.67471e-06
CENPU	628.777	0.917813	0.180306	5.0903	3.57489e-07	1.00552e-05
MXD1	148.525	2.07923	0.409227	5.08087	3.75707e-07	1.05436e-05
MAD1L1	672.085	0.86399	0.170083	5.07981	3.77814e-07	1.05788e-05
LCE1E	25.0384	3.95691	0.779227	5.078	3.81435e-07	1.06561e-05
ABCC6	36.425	1.87036	0.368569	5.07465	3.88216e-07	1.07968e-05
ANXA4	244.049	0.785352	0.154756	5.07477	3.87967e-07	1.07968e-05
HBS1L	486.643	-0.651399	0.128496	-5.06942	3.99035e-07	1.10657e-05
MPST	357.322	-0.714178	0.140888	-5.06911	3.99674e-07	1.10657e-05
PXT1	41.1394	1.93439	0.382432	5.05814	4.23367e-07	1.16955e-05
MT-CO3	29471.2	1.37601	0.272063	5.05767	4.24417e-07	1.16984e-05
SYNCRIP	1791.45	-0.846179	0.167414	-5.05443	4.31687e-07	1.18724e-05
H4C14	6327.29	-1.30168	0.257615	-5.0528	4.35387e-07	1.19476e-05
GRWD1	363.501	-1.0798	0.214087	-5.04374	4.56513e-07	1.2472e-05
RPL23AP7	104.25	0.989943	0.196264	5.04394	4.56044e-07	1.2472e-05
LIN28B	196.123	-0.850536	0.168653	-5.04313	4.57984e-07	1.24846e-05
SMARCA4	1019.29	-0.727434	0.144282	-5.04175	4.6129e-07	1.25471e-05
TNFRSF14	168.495	0.989399	0.196525	5.03445	4.79213e-07	1.3006e-05
COX16	294.021	-0.864759	0.171788	-5.03386	4.80698e-07	1.30178e-05
H2BC18	2914.31	-2.39333	0.475505	-5.03324	4.82264e-07	1.30317e-05
DCAKD	334.333	0.696166	0.138468	5.02765	4.96522e-07	1.33877e-05
NEU1	444.242	0.799856	0.159109	5.02711	4.97929e-07	1.33964e-05
H1-5	5888.51	-2.22537	0.44276	-5.02613	5.00481e-07	1.34359e-05
TACC2	18.0645	6.59892	1.31548	5.01637	5.26563e-07	1.41055e-05
NGFR	16.6633	3.73667	0.745129	5.0148	5.30894e-07	1.41908e-05
H2AC21	906.351	-1.34686	0.268934	-5.00815	5.49563e-07	1.46582e-05
DCAF1	411.229	-0.695685	0.139032	-5.00377	5.62208e-07	1.49632e-05
F2RL3	99.0162	1.71401	0.343017	4.99686	5.82713e-07	1.54756e-05
CSTA	37.5953	3.3274	0.666282	4.99398	5.91464e-07	1.56744e-05
IGFLR1	182.809	1.36855	0.274147	4.99202	5.97496e-07	1.58004e-05
GTF2I	1264.72	-0.682347	0.136831	-4.98679	6.13909e-07	1.61999e-05
TCF4	917.573	-0.736345	0.147693	-4.98566	6.17515e-07	1.62603e-05
CKAP5	1639.57	-0.707207	0.141916	-4.98329	6.25109e-07	1.64254e-05
ANK2	199.882	1.37284	0.275538	4.98241	6.27981e-07	1.64659e-05
HIP1	625.973	-0.609986	0.122569	-4.97667	6.46885e-07	1.69257e-05
PADI4	10.5351	6.74312	1.3558	4.97355	6.5739e-07	1.71643e-05
DEPP1	31.7066	2.43086	0.489144	4.96962	6.70852e-07	1.74789e-05
SLC7A11	334.221	1.27778	0.257357	4.965	6.87007e-07	1.78622e-05
NFE2L1	942.615	0.79375	0.159887	4.96443	6.89041e-07	1.78775e-05
APBB2	164.535	1.70164	0.343017	4.96079	7.02064e-07	1.81773e-05
JUN	512.571	1.54508	0.311699	4.95697	7.16012e-07	1.84997e-05
ACER2	78.9135	1.5019	0.303124	4.95475	7.24244e-07	1.86734e-05
TIMM13	177.85	-1.03759	0.209477	-4.95323	7.29906e-07	1.87803e-05
LEPROT	278.758	0.708234	0.143075	4.95008	7.41831e-07	1.90179e-05
RHBDF2	83.5047	1.26997	0.256561	4.94998	7.42214e-07	1.90179e-05
APLF	104.933	1.02329	0.206764	4.9491	7.45583e-07	1.90648e-05
CLU	175.332	1.12817	0.228006	4.94797	7.49906e-07	1.91357e-05
CLPTM1L	864.771	-0.703349	0.142275	-4.9436	7.66946e-07	1.94902e-05
STAT6	995.968	-0.534411	0.108094	-4.94395	7.65565e-07	1.94902e-05
SMC3	769.691	-0.603764	0.122152	-4.94273	7.7035e-07	1.95366e-05
PLA2G4A	94.6391	-1.95041	0.394941	-4.9385	7.87268e-07	1.98841e-05
POLR1B	627.88	-0.831833	0.168428	-4.9388	7.86065e-07	1.98841e-05
AP1S3	132.497	1.45294	0.294433	4.93471	8.02712e-07	2.02329e-05
HCFC1	704.76	-0.748637	0.152265	-4.91667	8.80294e-07	2.21433e-05
STK10	1406.09	0.725829	0.147643	4.91612	8.82753e-07	2.21601e-05
GTF3C2	628.806	-0.549951	0.111887	-4.91523	8.86787e-07	2.22163e-05
PCID2	434.621	-0.62884	0.127955	-4.91454	8.89901e-07	2.22493e-05
USP34	2313.6	-0.45782	0.0931747	-4.91357	8.94347e-07	2.23154e-05
ISCA2	222.554	-0.924507	0.188362	-4.90813	9.19478e-07	2.28503e-05
MYO7B	60.3259	1.99091	0.405604	4.9085	9.17767e-07	2.28503e-05
TP53INP1	394.909	2.4582	0.500905	4.90752	9.22364e-07	2.28761e-05
MORF4L1	503.98	-0.542751	0.110614	-4.90672	9.26134e-07	2.28911e-05
VARS1	651.89	-0.961152	0.195889	-4.9066	9.26667e-07	2.28911e-05
TNFRSF19	58.4919	-2.59601	0.529288	-4.90472	9.35622e-07	2.30662e-05
MT-ND2	1486.11	2.84837	0.581462	4.89863	9.65061e-07	2.37447e-05
TCTA	167.287	0.963407	0.196686	4.89819	9.67241e-07	2.37511e-05
HNRNPUL1	1304.72	-0.722972	0.147641	-4.89683	9.73927e-07	2.38451e-05
NELL1	38.4406	2.38657	0.487389	4.89663	9.74922e-07	2.38451e-05
GBP3	135.838	0.887621	0.181363	4.89416	9.87255e-07	2.40992e-05
PLEKHF1	120.619	0.950421	0.194526	4.88584	1.02991e-06	2.50909e-05
ENO2	99.6677	1.07171	0.21941	4.88451	1.03687e-06	2.51615e-05
RAD21	6305.62	-0.669487	0.137053	-4.88488	1.03491e-06	2.51615e-05
BLCAP	335.777	1.09087	0.223915	4.87181	1.10581e-06	2.67739e-05
PLEK	163.01	0.839529	0.172335	4.87148	1.10765e-06	2.67739e-05
PSMC3IP	139.547	0.936348	0.192237	4.87081	1.11144e-06	2.68131e-05
EIF3J	248.244	-0.651049	0.133827	-4.86486	1.1454e-06	2.75788e-05
SOX6	24.5244	4.32715	0.8896	4.86415	1.14951e-06	2.7624e-05
KLLN	84.3033	1.51037	0.31054	4.86371	1.15207e-06	2.76317e-05
CCL1	34.0963	2.07903	0.427762	4.86024	1.17245e-06	2.80466e-05
SLC2A3	631.48	0.996479	0.205053	4.85961	1.17616e-06	2.80466e-05
ZFP36L1	113.608	1.45097	0.298569	4.85976	1.17529e-06	2.80466e-05
ANKRA2	487.581	0.996053	0.20506	4.85738	1.1895e-06	2.831e-05
IFIT3	330.927	1.51704	0.312344	4.85696	1.19204e-06	2.83162e-05
USP37	904.778	0.718865	0.148069	4.85493	1.2043e-06	2.85526e-05
PTPN4	581.971	1.29112	0.266073	4.85252	1.21904e-06	2.88467e-05
TNFAIP8	1492.98	0.653095	0.134666	4.84975	1.23618e-06	2.91966e-05
VCAM1	618.916	1.36914	0.28259	4.84497	1.26631e-06	2.98512e-05
SAFB	273.102	-0.783616	0.161761	-4.84428	1.2707e-06	2.98977e-05
H2BC14	473.498	-2.42358	0.500423	-4.84305	1.27859e-06	3.00261e-05
MYC	560.443	-1.19692	0.247296	-4.84004	1.2981e-06	3.04267e-05
DUSP1	148.689	1.68266	0.347742	4.83881	1.30618e-06	3.05582e-05
NDRG1	57.4438	1.76218	0.364221	4.83821	1.31015e-06	3.05932e-05
GAS6-AS1	33.2342	2.19745	0.454973	4.82986	1.36631e-06	3.17846e-05
LRIG1	544.071	-0.822508	0.170293	-4.82996	1.36558e-06	3.17846e-05
H2BC21	1560.55	-1.47954	0.306715	-4.82383	1.40827e-06	3.26807e-05
ZBP1	82.8049	1.9995	0.414526	4.82357	1.41011e-06	3.26807e-05
EIF2A	704.407	-1.07347	0.222754	-4.81909	1.44217e-06	3.33613e-05
PXDN	41.8825	6.9731	1.44981	4.80967	1.51178e-06	3.49064e-05
C11orf21	27.9531	2.48247	0.51623	4.80884	1.51811e-06	3.49222e-05
NEMP1	890.71	0.857365	0.178289	4.80886	1.51797e-06	3.49222e-05
DRAM1	464.293	0.977407	0.203301	4.80769	1.52686e-06	3.50583e-05
MRPS34	215.795	-1.14621	0.238436	-4.8072	1.53059e-06	3.50787e-05
MAP3K8	337.082	0.920901	0.191602	4.80633	1.5373e-06	3.51674e-05
BRIP1	923.568	0.656492	0.136762	4.80024	1.58476e-06	3.61862e-05
TCF19	1158.76	0.965369	0.201133	4.79965	1.58946e-06	3.62268e-05
LINC00663	45.523	1.63417	0.340544	4.7987	1.59695e-06	3.63306e-05
WHAMM	63.8165	2.07611	0.433055	4.79409	1.63411e-06	3.71078e-05
EBPL	151.324	-1.07783	0.224951	-4.79139	1.65633e-06	3.74749e-05
OPN3	109.178	-1.07554	0.224467	-4.79151	1.65532e-06	3.74749e-05
MPZL3	69.993	1.68137	0.350992	4.79033	1.66507e-06	3.76038e-05
CX3CR1	43.7469	2.99742	0.626095	4.78747	1.68893e-06	3.80732e-05
KLRK1	416.24	0.722668	0.151047	4.78438	1.71514e-06	3.85938e-05
MDN1	1523.16	-0.589895	0.123319	-4.7835	1.72266e-06	3.86451e-05
TP53TG1	92.6102	1.1172	0.233559	4.78339	1.72367e-06	3.86451e-05
RBM26-AS1	95.9961	0.942787	0.197179	4.78137	1.74103e-06	3.89638e-05
PPP4C	430.064	-0.788824	0.165063	-4.77892	1.7624e-06	3.9371e-05
BSCL2	157.495	0.832898	0.174397	4.77587	1.78931e-06	3.99e-05
GREM2	22.7848	2.13955	0.448153	4.77416	1.80459e-06	4.01684e-05
STON2	19.5503	3.7607	0.787854	4.77335	1.8119e-06	4.02586e-05
KHSRP	977.751	-0.805988	0.168884	-4.77243	1.8202e-06	4.03706e-05
LINC03062	160.082	1.0493	0.219945	4.77076	1.8353e-06	4.06327e-05
E2F5	105.349	-1.24854	0.261816	-4.76878	1.85346e-06	4.08973e-05
FYB1	37.3693	2.03162	0.426028	4.76874	1.85386e-06	4.08973e-05
NDUFAF6	190.436	1.04896	0.220116	4.76549	1.88395e-06	4.14871e-05
CAMK4	624.216	0.653837	0.137325	4.76122	1.92423e-06	4.22989e-05
NCAPH	527.808	-0.849041	0.178354	-4.76042	1.93192e-06	4.23927e-05
ABCA5	114.608	1.25605	0.263885	4.75984	1.93743e-06	4.24384e-05
THOC2	723.628	-0.504116	0.106175	-4.74799	2.05445e-06	4.4922e-05
CAPN12	16.2419	3.29083	0.693256	4.74691	2.06546e-06	4.50538e-05
PPP1R16B	866.82	0.941414	0.198331	4.74669	2.06776e-06	4.50538e-05
USHBP1	17.1439	3.24441	0.683935	4.74374	2.09804e-06	4.56333e-05
CCDC148	27.673	1.87471	0.395492	4.7402	2.13502e-06	4.63562e-05
TMEM229B	115.843	1.18295	0.249755	4.73644	2.17502e-06	4.7142e-05
MKNK2	798.463	0.567374	0.11981	4.73563	2.18373e-06	4.71654e-05
PLCXD2	248.856	0.963189	0.203392	4.73563	2.18371e-06	4.71654e-05
BLOC1S2	496.167	0.745267	0.15739	4.73515	2.18891e-06	4.71951e-05
SLC16A3	130.102	1.20286	0.25416	4.7327	2.21549e-06	4.7685e-05
CRTAM	153.555	1.76804	0.373643	4.7319	2.2243e-06	4.77915e-05
TRA2B	1541.07	-0.733525	0.155034	-4.73139	2.22985e-06	4.78277e-05
CDON	582.493	-0.998675	0.211183	-4.72896	2.2567e-06	4.83199e-05
MAF1	500.154	-0.514436	0.108792	-4.7286	2.26071e-06	4.83221e-05
AP5B1	370.717	-0.668555	0.1416	-4.72144	2.34183e-06	4.99698e-05
NAA25	271.376	-0.7237	0.153383	-4.71825	2.37885e-06	5.06724e-05
FGF9	20.0828	2.68408	0.568929	4.71777	2.38439e-06	5.07031e-05
LINC03024	137.669	-0.837753	0.177868	-4.70996	2.47761e-06	5.2595e-05
EPHA4	38.7675	2.86058	0.607434	4.70929	2.48587e-06	5.268e-05
IL4I1	95.2847	1.48935	0.316825	4.70086	2.59069e-06	5.4775e-05
RCBTB1	978.582	0.614005	0.130622	4.70063	2.59358e-06	5.4775e-05
RRP1B	941.642	-0.827122	0.176027	-4.69883	2.6165e-06	5.5165e-05
KCNJ2	684.838	0.838606	0.178692	4.69302	2.69202e-06	5.66605e-05
ANXA7	1118.85	-0.547274	0.116644	-4.69182	2.70779e-06	5.68957e-05
MCM6	1453.91	-0.591433	0.126121	-4.68942	2.73976e-06	5.74699e-05
ADO	386.179	0.795094	0.169784	4.68297	2.82744e-06	5.92088e-05
CLTC	5604.58	-0.524621	0.112057	-4.68175	2.84432e-06	5.94618e-05
ZNF487	41.991	2.09385	0.447658	4.67735	2.90613e-06	6.06513e-05
FAM228B	64.5261	1.21256	0.259597	4.67095	2.99806e-06	6.24646e-05
CCL2	72.9042	2.03668	0.436423	4.66675	3.05994e-06	6.36468e-05
TXLNA	1719.65	0.612697	0.131371	4.66389	3.10294e-06	6.44329e-05
IFIT5	42.6367	1.60193	0.343678	4.66114	3.14467e-06	6.51899e-05
C20orf204	143.356	1.35182	0.290063	4.66044	3.1553e-06	6.52441e-05
RBM12	1114.75	-0.800432	0.171756	-4.66028	3.15782e-06	6.52441e-05
RND1	121.342	1.67477	0.359547	4.658	3.19295e-06	6.58599e-05
AAAS	357.219	-0.646695	0.13897	-4.65347	3.26396e-06	6.72125e-05
IL32	2746.69	0.764508	0.164339	4.65203	3.28681e-06	6.75707e-05
DUSP11	323.297	0.868661	0.186796	4.65032	3.31428e-06	6.80224e-05
GNPDA1	7.66048	6.28713	1.35453	4.64155	3.45806e-06	7.08558e-05
PDZK1	22.6253	2.86654	0.617795	4.63995	3.4849e-06	7.12878e-05
CSNK2A1	1121.21	-0.691726	0.149281	-4.63373	3.59134e-06	7.33439e-05
HNRNPM	688.828	-0.857446	0.185071	-4.63306	3.60308e-06	7.34625e-05
LAT	117.463	0.928765	0.200488	4.63252	3.61234e-06	7.35301e-05
LINC03004	19.4797	2.4746	0.534328	4.63124	3.63482e-06	7.38662e-05
GZMA	650.255	1.62312	0.35052	4.6306	3.646e-06	7.3972e-05
EXOSC7	219.253	-0.73988	0.1599	-4.62716	3.70721e-06	7.50907e-05
METRNL	68.9558	1.38398	0.299418	4.62224	3.7961e-06	7.66622e-05
TNFAIP3	719.183	1.04804	0.226741	4.62219	3.79718e-06	7.66622e-05
NIPAL2	241.239	0.953165	0.206243	4.62156	3.80874e-06	7.67704e-05
INHBE	21.9782	3.77327	0.81659	4.62076	3.82328e-06	7.69382e-05
FGFR1	436.849	-0.809004	0.175098	-4.6203	3.8319e-06	7.69864e-05
VPS51	484.283	-0.903832	0.195708	-4.61827	3.86949e-06	7.76155e-05
LLGL1	224.828	-0.637506	0.138116	-4.61574	3.91705e-06	7.84425e-05
CDC20	585.193	-1.18844	0.257608	-4.61338	3.96166e-06	7.90799e-05
RAD51D	675.649	0.539107	0.116853	4.61355	3.95856e-06	7.90799e-05
MTCO1P12	115.168	2.05387	0.445712	4.60807	4.06431e-06	8.09982e-05
CEP192	1531.47	-0.705287	0.153119	-4.60613	4.10229e-06	8.16237e-05
TNFRSF10A	39.7802	1.93769	0.421051	4.60202	4.18411e-06	8.3118e-05
H2AC20	1211.45	-1.08784	0.236446	-4.60083	4.2082e-06	8.34626e-05
ACTB	28306.7	-0.695859	0.151321	-4.59856	4.25429e-06	8.42418e-05
HNRNPK	3353.78	-0.653815	0.142261	-4.59588	4.3093e-06	8.51948e-05
MT-ND4L	647.233	3.15784	0.687285	4.59466	4.33457e-06	8.55575e-05
MMADHC	579.514	-0.636854	0.138634	-4.59379	4.35269e-06	8.57785e-05
WHRN	44.0756	2.13136	0.464195	4.59153	4.40014e-06	8.65757e-05
MBD2	1064.65	-0.472231	0.102908	-4.58886	4.45669e-06	8.75491e-05
SLC35D1	510.521	0.999657	0.217922	4.58723	4.49159e-06	8.8095e-05
PNMA1	342.448	-0.656828	0.143349	-4.58203	4.60479e-06	9.01722e-05
MT-CO1	51179.7	2.07865	0.453918	4.57934	4.66439e-06	9.11951e-05
ANAPC11	258.867	-0.825352	0.180256	-4.57876	4.6773e-06	9.13033e-05
PMAIP1	1700.6	0.761358	0.166335	4.57726	4.71109e-06	9.1818e-05
GRASLND	38.8125	1.47821	0.323069	4.57552	4.75029e-06	9.24365e-05
UBXN6	187.765	-0.802059	0.175476	-4.57077	4.85945e-06	9.44122e-05
ARHGAP26	566.157	0.672594	0.147275	4.56692	4.94945e-06	9.58598e-05
YPEL2	446.242	1.18911	0.260372	4.56696	4.94847e-06	9.58598e-05
H3C12	876.61	-2.40501	0.526706	-4.56614	4.96797e-06	9.60682e-05
KPNA2	2300.22	-0.966185	0.211658	-4.56484	4.99874e-06	9.65124e-05
RAB8A	587.301	-0.689923	0.151535	-4.55291	5.29089e-06	0.000101994
ALOX5AP	157.697	1.79247	0.393878	4.55082	5.34383e-06	0.000102854
PLCG2	1061.17	0.676112	0.148648	4.54842	5.40511e-06	0.000103872
ARHGAP25	136.084	0.950063	0.209107	4.54343	5.53461e-06	0.000106196
OTOA	29.1071	3.51712	0.774921	4.53868	5.66084e-06	0.00010845
WDR12	240.096	-0.970511	0.213881	-4.53762	5.68923e-06	0.000108825
LINC00824	25.7986	2.71449	0.598494	4.53554	5.74575e-06	0.000109737
LARP4B	754.764	-0.440155	0.0971521	-4.53058	5.88232e-06	0.000112172
ARRDC3	359.494	1.3984	0.3087	4.52996	5.89941e-06	0.000112325
HNRNPA0	373.041	-0.815881	0.180149	-4.52892	5.92856e-06	0.000112706
GJD3-AS1	107.827	0.939287	0.207427	4.52827	5.94682e-06	0.000112707
SLC2A8	157.897	0.926711	0.204639	4.52852	5.9399e-06	0.000112707
MT-ND4	4542.17	2.85935	0.631936	4.52474	6.04688e-06	0.000114428
ANKRD36C	535.624	1.02808	0.227308	4.52285	6.10116e-06	0.000115279
GOLGA8N	40.3839	1.60391	0.354695	4.52194	6.12763e-06	0.000115603
GCA	113.834	0.943145	0.208668	4.51983	6.18886e-06	0.000116548
ZNF22	382.163	-0.939725	0.207923	-4.51957	6.19658e-06	0.000116548
CEP85L	294.305	1.04622	0.231546	4.5184	6.23096e-06	0.000117017
FSD1L	232.593	0.91769	0.203144	4.51744	6.2592e-06	0.000117369
GZMH	109.871	1.55948	0.345319	4.51606	6.29997e-06	0.000117955
JMY	231.258	1.32723	0.293993	4.5145	6.34653e-06	0.000118647
ODAPH	31.303	2.08648	0.462456	4.51174	6.42967e-06	0.00012002
CASQ1	53.2491	1.87817	0.417087	4.50308	6.69772e-06	0.000124836
STARD9	226.018	1.40451	0.312056	4.50084	6.76844e-06	0.000125964
CCND3	507.585	0.960297	0.213451	4.4989	6.83049e-06	0.000126738
XACT	45.5696	5.35249	1.1897	4.49904	6.82612e-06	0.000126738
HSPA4	1701.54	-0.851559	0.189318	-4.49804	6.85843e-06	0.000127066
OGFOD3	120.911	-0.80289	0.178556	-4.49658	6.90556e-06	0.000127748
TMEM147	225.097	-0.944301	0.210161	-4.49323	7.01493e-06	0.000129577
ZC3H12A	105.301	1.15797	0.257881	4.49031	7.11189e-06	0.000131172
TRIM26	670.955	0.802385	0.178803	4.48754	7.20517e-06	0.000132695
XPO1	3184	-0.672608	0.149927	-4.48625	7.24885e-06	0.000133301
CHD4	2647.66	-0.707579	0.157747	-4.48553	7.27326e-06	0.000133552
HDAC3	816.396	-0.503102	0.112191	-4.48432	7.31465e-06	0.000134113
TWNK	89.949	-0.989988	0.220897	-4.48167	7.40616e-06	0.00013559
PAWR	50.0883	-1.30929	0.292228	-4.48036	7.45172e-06	0.000136222
SBF2	25.5384	3.14065	0.701147	4.47931	7.48864e-06	0.000136695
PRKAB1	239.884	0.890708	0.198879	4.47863	7.51224e-06	0.000136914
SF3B3	1806.35	-0.652128	0.145618	-4.47834	7.52272e-06	0.000136914
NUP188	566.151	-0.712816	0.159265	-4.47565	7.61779e-06	0.00013844
PTGES3	1105	-0.871458	0.194773	-4.47422	7.66918e-06	0.00013917
SPIN4	221.684	0.686194	0.153408	4.47299	7.7134e-06	0.000139767
HNRNPU	4629.11	-0.549996	0.122995	-4.47168	7.76058e-06	0.000140417
C8orf82	54.9686	-1.12453	0.251584	-4.4698	7.82924e-06	0.000141452
TIAM2	131.317	0.969354	0.216942	4.46826	7.88596e-06	0.000142269
PCDH12	11.637	5.06467	1.13459	4.46386	8.04954e-06	0.000145009
EFNA3	22.8042	-1.60926	0.360546	-4.4634	8.06676e-06	0.000145108
CEBPG	561.699	0.795847	0.178356	4.46212	8.11539e-06	0.00014556
INKA1	42.3182	1.3597	0.304721	4.46212	8.11539e-06	0.00014556
DOP1A	321.063	1.06696	0.23916	4.46128	8.14723e-06	0.000145919
C3orf18	293.76	1.20113	0.269363	4.45917	8.22764e-06	0.000147131
USP9X	1746.57	-0.456258	0.102325	-4.45889	8.23864e-06	0.000147131
MRPL58	140.041	-1.08143	0.242733	-4.45521	8.38102e-06	0.000149457
MT-ND6	302.829	4.65187	1.04517	4.45084	8.55347e-06	0.000152313
NOL4L	68	1.50181	0.337525	4.44949	8.60725e-06	0.000153051
SLAMF7	599.263	1.21698	0.273693	4.4465	8.728e-06	0.000154975
SAMSN1	73.8865	2.17609	0.489561	4.44499	8.78961e-06	0.000155846
PSMG2	339.327	-0.574923	0.129354	-4.44459	8.80613e-06	0.000155915
PTPN22	421.793	0.662986	0.149361	4.43881	9.04594e-06	0.000159932
ACIN1	654.01	-0.486315	0.109704	-4.43296	9.2948e-06	0.000163864
ERO1A	1676.01	-0.614594	0.138639	-4.43305	9.29087e-06	0.000163864
DSE	234.883	0.644055	0.145402	4.42949	9.44563e-06	0.000166286
WDR36	766.635	-0.635725	0.143557	-4.42839	9.49406e-06	0.000166901
FAM161B	58.1239	1.28667	0.290863	4.42362	9.70614e-06	0.000170387
MAPRE3	21.9589	2.63106	0.594961	4.42223	9.76853e-06	0.00017124
HNRNPR	1088.69	-0.841054	0.190222	-4.42142	9.80538e-06	0.0001714
ZMIZ2	312.789	0.92756	0.209787	4.42145	9.80429e-06	0.0001714
FCGBP	27.115	2.00103	0.452672	4.42047	9.84842e-06	0.000171668
TBL1XR1	1885.5	-0.458402	0.103696	-4.42063	9.8412e-06	0.000171668
CBX6	1277.1	-0.6758	0.152896	-4.42	9.87001e-06	0.000171802
XRCC5	4806.78	-0.836846	0.189391	-4.41861	9.93399e-06	0.000172673
MT-ND5	2250.71	2.6618	0.603869	4.40791	1.04372e-05	0.000180972
NUP88	420.166	-0.834309	0.189286	-4.40766	1.04491e-05	0.000180972
PLXNB1	80.3764	1.1012	0.249845	4.40754	1.04553e-05	0.000180972
ZNF600	188.751	0.96294	0.218578	4.40548	1.05548e-05	0.000182439
FZD6	262.631	0.65044	0.147663	4.40488	1.05841e-05	0.00018269
STAT4	460.168	0.767472	0.174255	4.40429	1.06129e-05	0.000182932
ABHD3	226.395	0.622487	0.141375	4.4031	1.06713e-05	0.000183173
DHX9	2909.04	-0.837837	0.190274	-4.40331	1.06612e-05	0.000183173
RAET1K	46.5288	1.46564	0.332861	4.40316	1.06685e-05	0.000183173
PCGF5	542.815	0.604685	0.13735	4.40252	1.07002e-05	0.000183416
SMG6	293.057	0.804854	0.183212	4.39301	1.11791e-05	0.000191359
TNFSF9	541.598	0.660107	0.150329	4.3911	1.1278e-05	0.000192786
NT5DC4	42.3505	1.92955	0.439789	4.38746	1.14684e-05	0.00019577
PRPF8	1890.76	-0.594733	0.135613	-4.38552	1.15707e-05	0.000197244
AMD1	562.025	-0.919664	0.2098	-4.38354	1.16769e-05	0.00019878
EPHB1	36.51	1.74778	0.399023	4.38015	1.18595e-05	0.000201612
H3C7	1646.16	-1.21437	0.277333	-4.37873	1.1937e-05	0.000202651
ANK3	532.552	0.830547	0.18984	4.37499	1.21439e-05	0.000205881
RAP1GAP2	29.3156	2.19991	0.503145	4.37232	1.22932e-05	0.000208127
PIM2	2048.29	0.863925	0.19765	4.37099	1.23682e-05	0.000209111
HEXIM1	642.861	1.30598	0.299234	4.3644	1.2747e-05	0.00021522
COPB2	1200.64	-0.560206	0.128454	-4.36115	1.29381e-05	0.000217925
LDLR	568.034	-1.16991	0.268262	-4.36108	1.29424e-05	0.000217925
CALHM1	6.09408	5.97687	1.37096	4.35963	1.30281e-05	0.000218476
POLR3E	253.823	-0.706275	0.161997	-4.3598	1.30183e-05	0.000218476
RTF1	288.765	-0.611713	0.140295	-4.36018	1.29954e-05	0.000218476
ELAC2	563.998	-0.647361	0.148503	-4.35924	1.30515e-05	0.000218572
GPRIN3	717.324	-1.2383	0.284198	-4.35717	1.31753e-05	0.000220348
IGF1R	63.1755	1.90368	0.437208	4.35417	1.3357e-05	0.000223085
PCNT	749.826	0.683566	0.157018	4.35342	1.34033e-05	0.000223556
KAT8	156.206	-0.937383	0.215698	-4.34582	1.38757e-05	0.000231124
PPM1F-AS1	18.0961	3.61904	0.833223	4.34342	1.4028e-05	0.000233348
RAD51AP1	261.085	0.74276	0.171174	4.33921	1.42994e-05	0.000237224
USP7	498.333	-0.742547	0.171122	-4.33928	1.42949e-05	0.000237224
IKBKB-DT	31.3281	1.99079	0.458919	4.33799	1.43791e-05	0.000238228
CDCA8	341.989	-0.758077	0.17477	-4.33757	1.44068e-05	0.000238367
RNF157	1839.38	-0.737729	0.170125	-4.33639	1.44844e-05	0.00023933
UTP18	436.65	-0.980343	0.226159	-4.33475	1.45926e-05	0.000240798
CDC27	1518.77	-0.523753	0.120881	-4.33278	1.47239e-05	0.000242641
TMBIM1	528.733	0.848425	0.195893	4.33107	1.48388e-05	0.000244208
ZFPM1	53.5934	1.34472	0.310697	4.32806	1.50428e-05	0.000247237
DDX54	394.662	-0.719082	0.166289	-4.32428	1.5303e-05	0.000250848
TOMM20	741.379	-0.687616	0.159011	-4.32433	1.52998e-05	0.000250848
ASB16-AS1	105.637	1.00469	0.232528	4.32073	1.55514e-05	0.000254547
YWHAE	826.942	-0.876661	0.202909	-4.32047	1.55698e-05	0.000254547
KRCC1	306.729	0.695733	0.161259	4.31438	1.60055e-05	0.000261324
CLIC5	80.5128	0.882317	0.204607	4.31224	1.61606e-05	0.000263509
ANP32A	606.792	-0.710295	0.164734	-4.31178	1.61942e-05	0.00026371
NEK8	74.4788	1.13511	0.263302	4.31104	1.62491e-05	0.000264257
NDC1	544.281	-0.928313	0.215459	-4.30854	1.64338e-05	0.000266908
G3BP1	4041.39	-0.624159	0.144941	-4.30629	1.66014e-05	0.000269278
RCC1	306.504	-1.05472	0.245017	-4.30468	1.67228e-05	0.000270891
PLA2G4C	33.1005	1.92247	0.446789	4.30286	1.68611e-05	0.000272775
KIAA1217	35.7538	2.397	0.557148	4.30227	1.69061e-05	0.000273088
SOCS1	220.021	1.02733	0.238801	4.30202	1.69246e-05	0.000273088
CLNS1A	412.008	-0.691491	0.160777	-4.30094	1.70073e-05	0.000273709
FOCAD	456.887	-0.516135	0.120001	-4.3011	1.69949e-05	0.000273709
PPP2R1A	995.548	-0.695411	0.161708	-4.30041	1.70484e-05	0.000274015
DNAJB9	125.746	1.30892	0.304504	4.29852	1.71944e-05	0.000276002
ARPC4-TTLL3	140.879	0.905935	0.210814	4.29732	1.72875e-05	0.000276808
DGKA	389.799	0.5486	0.127662	4.2973	1.72893e-05	0.000276808
KPNA1	639.366	1.0422	0.242603	4.29593	1.73966e-05	0.000278166
ECSIT	135.042	-0.764177	0.177947	-4.29441	1.75162e-05	0.000279717
SFXN5	206.957	0.985508	0.229562	4.293	1.76277e-05	0.000281134
FASN	1597.08	-0.934843	0.217876	-4.29072	1.78095e-05	0.000283669
PTPN14	1562.71	0.903954	0.210783	4.28856	1.79833e-05	0.000286069
MASTL	531.971	0.662052	0.15456	4.28346	1.8401e-05	0.000292337
FAM66D	12.8973	3.57892	0.835667	4.28271	1.84627e-05	0.000292941
IL13	653.179	2.32539	0.543007	4.28243	1.84867e-05	0.000292947
FKBP8	875.775	-0.600762	0.140316	-4.28148	1.85653e-05	0.000293815
DDX17	4816.83	-0.532822	0.124463	-4.28098	1.86074e-05	0.000294107
CFH	1372.52	0.766534	0.179147	4.2788	1.87903e-05	0.000296618
KLF6	306.729	0.976635	0.228341	4.2771	1.89346e-05	0.000298516
MT-CYB	2455.95	2.72571	0.637367	4.27651	1.89843e-05	0.000298919
REPIN1	372.355	-0.518834	0.121345	-4.2757	1.9054e-05	0.000299634
TNIP2	495.939	0.909664	0.21279	4.27493	1.91197e-05	0.000300287
MIF	1095.62	-1.2062	0.282688	-4.2669	1.98204e-05	0.000310897
DHRS4L2	84.1788	-1.20864	0.283301	-4.26626	1.98776e-05	0.000311399
CTCF	418.61	-0.641734	0.150604	-4.26107	2.03448e-05	0.000318017
MRPL12	62.4727	-1.1795	0.276832	-4.26072	2.03771e-05	0.000318017
SPNS3	10.9074	4.98283	1.16943	4.26092	2.03583e-05	0.000318017
TMTC3	239.018	1.13164	0.265809	4.25734	2.06873e-05	0.000322451
DOCK8	421.025	1.09138	0.256467	4.25545	2.08626e-05	0.000324774
TSC22D3	76.184	1.46248	0.343951	4.252	2.11869e-05	0.000329408
H3-3A	1235.02	-0.729802	0.171682	-4.25089	2.12927e-05	0.000330638
USP10	578.943	-0.491898	0.115806	-4.2476	2.16069e-05	0.000335096
FCGR3A	31.8766	2.71374	0.639791	4.2416	2.21929e-05	0.000343754
RBX1	367.732	-0.812417	0.191562	-4.241	2.22525e-05	0.000344246
BCL2L1	682.035	1.0656	0.251295	4.24044	2.23078e-05	0.00034467
TM7SF3	1664.42	0.515325	0.121587	4.23832	2.25203e-05	0.000347087
USP2	19.3721	2.08778	0.492565	4.23859	2.24931e-05	0.000347087
MYO5A	752.33	0.733942	0.173232	4.23676	2.26773e-05	0.000349072
CARNMT1	392.672	-0.658075	0.155387	-4.23507	2.2848e-05	0.000351264
PUF60	684.799	-0.816092	0.192777	-4.23335	2.30237e-05	0.000353526
ATXN2L	471.784	0.839931	0.198448	4.2325	2.31105e-05	0.000354419
BAG6	773.173	-0.56033	0.132422	-4.23139	2.32257e-05	0.000355743
NGLY1	295.779	-0.649041	0.153532	-4.22741	2.36397e-05	0.000361637
HSD17B7P2	96.6635	2.11339	0.500533	4.22228	2.41841e-05	0.000369509
CRLF3	368.776	-0.723344	0.171392	-4.22041	2.43855e-05	0.000372127
CST7	30.0554	2.06954	0.490453	4.21965	2.44686e-05	0.000372935
NDFIP2	1542.48	0.808172	0.191626	4.21745	2.47079e-05	0.000376119
HNRNPDL	1452.73	-0.815839	0.193505	-4.21612	2.48541e-05	0.000377879
GNG2	885.622	0.908384	0.215497	4.2153	2.49448e-05	0.000378794
TMEM175	87.3827	1.27113	0.301606	4.21454	2.5029e-05	0.000379607
PRKCQ	167.869	0.814303	0.193244	4.21387	2.51034e-05	0.000380268
GXYLT1	333.698	0.882185	0.209391	4.21309	2.51897e-05	0.00038111
DKC1	544.377	-1.12621	0.267528	-4.20971	2.55704e-05	0.000385926
G2E3	369.69	-0.621254	0.147575	-4.20975	2.55652e-05	0.000385926
NARS2	172.851	-0.73745	0.175191	-4.20942	2.56032e-05	0.000385951
KLRD1	160.091	1.35938	0.323009	4.20849	2.57082e-05	0.000387061
LCAT	23.1248	1.98262	0.471362	4.20615	2.59761e-05	0.000390619
PRMT5	426.747	-0.757415	0.180219	-4.20274	2.637e-05	0.000396061
BATF	55.6464	1.82513	0.434422	4.2013	2.65388e-05	0.000398115
ITFG1	345.686	0.604181	0.143827	4.20076	2.66021e-05	0.00039858
EIF1	1419.89	0.620487	0.147819	4.19762	2.69738e-05	0.000402603
EVL	642.485	1.12423	0.267854	4.19718	2.70263e-05	0.000402603
HDAC2	136.784	-0.897014	0.213721	-4.19712	2.70332e-05	0.000402603
NDUFB7	226.549	-0.920782	0.219379	-4.19722	2.70208e-05	0.000402603
WDR82	858.454	-0.582446	0.13875	-4.19782	2.69494e-05	0.000402603
GRB2	1678.38	-0.431809	0.102909	-4.19601	2.71653e-05	0.000404083
STX3	133.411	1.20276	0.286716	4.19494	2.72941e-05	0.000405512
DAP	370.685	0.763188	0.182008	4.19316	2.75096e-05	0.000407561
MIR22HG	37.8585	1.95959	0.467333	4.19314	2.75124e-05	0.000407561
NOP14-AS1	181.423	0.972985	0.232051	4.19299	2.75308e-05	0.000407561
SSB	555.679	-0.904941	0.215854	-4.19237	2.7605e-05	0.000408171
ABCB9	35.0251	1.49769	0.357296	4.19173	2.76832e-05	0.000408715
TMEM65	249.879	0.740998	0.176784	4.19153	2.77078e-05	0.000408715
KDM1A	679.217	-0.862091	0.205749	-4.19001	2.78939e-05	0.00041097
BZW2	620.467	-0.905767	0.216236	-4.18879	2.80446e-05	0.000412209
LSM7	187.866	-1.03086	0.246085	-4.18905	2.80123e-05	0.000412209
BTG3	281.562	0.726982	0.173664	4.18613	2.83747e-05	0.000416567
SIGLEC17P	37.1404	1.74406	0.416978	4.18262	2.8817e-05	0.000422558
LEO1	249.971	-0.763889	0.182691	-4.18131	2.89829e-05	0.000423986
MRPL54	118.92	-1.1971	0.286286	-4.18147	2.89632e-05	0.000423986
CDK6	1790.44	1.01855	0.243681	4.17985	2.91703e-05	0.000426223
TENT5A	340.507	0.900097	0.215462	4.17752	2.9471e-05	0.00043011
LRG1	24.6136	1.89724	0.454415	4.17513	2.97817e-05	0.000434132
H2BC7	310.497	-1.43023	0.34264	-4.17414	2.99115e-05	0.000435511
RAP2A	1565	-0.453213	0.108706	-4.16915	3.05733e-05	0.000444624
SMIM2-AS1	13.0177	5.20692	1.24903	4.16879	3.06225e-05	0.000444817
HIVEP3	55.6233	1.22923	0.295004	4.16684	3.08857e-05	0.000448114
GRN	664.952	0.595674	0.142999	4.16557	3.10573e-05	0.000450076
ADD1	1179.02	-0.478194	0.114819	-4.16475	3.1169e-05	0.000451167
DHX57	555.754	-0.472346	0.113461	-4.16307	3.13998e-05	0.000453976
SMIM38	13.6225	4.30753	1.03547	4.15996	3.183e-05	0.000459659
GAB1	288.287	1.03673	0.249415	4.15667	3.22927e-05	0.000465255
H3C11	531.724	-1.31045	0.315256	-4.15678	3.22768e-05	0.000465255
CENPA	191.533	-1.075	0.258679	-4.15573	3.24255e-05	0.000466626
LRRC37A4P	217.966	1.15912	0.278964	4.15511	3.25132e-05	0.000466802
MOCS2-DT	49.1886	1.27011	0.30566	4.15531	3.24853e-05	0.000466802
GCSAM	393.758	1.01522	0.244511	4.15206	3.29499e-05	0.000471529
HBEGF	33.6276	1.43989	0.346794	4.15201	3.29567e-05	0.000471529
LINC00892	46.3911	1.58924	0.382727	4.15242	3.28985e-05	0.000471529
DSCAML1	11.1246	3.66882	0.8839	4.15072	3.31431e-05	0.000473634
TMOD2	159.265	0.62447	0.150458	4.15046	3.31804e-05	0.000473634
TUBB3	10.9936	3.32456	0.801229	4.14933	3.33452e-05	0.000475439
PPIP5K2	673.041	-0.518495	0.125008	-4.14768	3.35865e-05	0.000478129
RNF38	298.12	0.973645	0.234754	4.14751	3.36112e-05	0.000478129
NDUFAF3	129.683	-0.778712	0.187771	-4.14715	3.36646e-05	0.000478339
ATP1A4	50.6455	1.66714	0.402318	4.14382	3.41562e-05	0.000484767
APRT	311.055	-0.756638	0.182668	-4.14214	3.44082e-05	0.000487785
LINC00294	120.635	0.860021	0.207666	4.14136	3.45256e-05	0.000488888
ANKRD36	455.923	0.996841	0.240732	4.14088	3.45976e-05	0.000489348
WFS1	117.051	0.847359	0.20469	4.13972	3.47729e-05	0.000491267
TFEC	102.812	1.28881	0.311382	4.13902	3.48791e-05	0.000492205
CUL4A	934.68	-0.606975	0.146667	-4.13845	3.49662e-05	0.000492585
LINC02846	62.6966	1.08877	0.263096	4.13832	3.49856e-05	0.000492585
GPSM2	207.058	-0.726572	0.175611	-4.13738	3.51288e-05	0.000494038
SQLE	456.232	-0.901735	0.218002	-4.13636	3.52853e-05	0.000495676
DYNC2H1	110.703	0.89708	0.216944	4.13507	3.54845e-05	0.000497909
THRAP3	1285.82	-0.638748	0.154494	-4.13446	3.55792e-05	0.000498674
REV3L	529.673	0.66754	0.161593	4.13099	3.61205e-05	0.000505116
USP24	1077.97	-0.401093	0.0970881	-4.13122	3.60837e-05	0.000505116
MAP4K4	976.933	0.594139	0.143944	4.12757	3.6661e-05	0.000511298
NF2	617.195	-0.577277	0.139858	-4.12758	3.66601e-05	0.000511298
OAS1	71.2056	1.31256	0.31801	4.12741	3.66865e-05	0.000511298
MICA	82.1249	0.915007	0.221733	4.12661	3.68151e-05	0.000512513
PPA2	341.505	-0.939127	0.227658	-4.12516	3.7048e-05	0.000515176
SFPQ	2198.27	-0.829356	0.201077	-4.12458	3.71414e-05	0.000515894
EZH1	322.633	0.964409	0.233889	4.12336	3.7338e-05	0.000518044
[truncated: 2,421 more rows]

## Sheet: Table S8
Supplementary Table 8. Differentially regulated pathways in NK-S1 cell line following BCV treatment
[truncated: 204 more rows]

[truncated: 9 more sheets: Table S9, Table S10, Table S11, Table S12, Table S13, Table S14, Table S15, Table S16, Table S17]
